# Supplementary material for: Competition for DNA binding between paralogous transcription factors determines their genomic occupancy and regulatory functions
Source: HighWire-hosted journal article supplement (doi:10.1101/gr.275145.120), 2021-05-11
Supplement: Supplemental_Table_S1.xlsx [file Supplemental_Table_S1.xlsx]

## Sheet: README
Supplemental Table S1. Evolutionary conservation of the DNA-binding domains of Cbf1 and Pho4. We analyzed each proteome for the presence of orthologs from different sub-families using HMMs downloaded from EggNog5 (Huerta-Cepas et al. 2019), as described in Methods. The predicted proteomes were downloaded from either NCBI Genome or JGI Mycocosm. Species are ordered accordingly to the phylogenetic …
Atchley WR, Terhalle W, Dress A. 1999. Positional dependence, cliques, and predictive motifs in the bHLH protein domain. J Mol Evol 48: 501-516.
Huerta-Cepas J, Szklarczyk D, Heller D, Hernandez-Plaza A, Forslund SK, Cook H, Mende DR, Letunic I, Rattei T, Jensen LJ et al. 2019. eggNOG 5.0: a hierarchical, functionally and phylogenetically annotated orthology resource based on 5090 organisms and 2502 viruses. Nucleic Acids Res 47: D309-D314.

## Sheet: Sheet1
Species	Rtg3 family	Alignment to HLH.hmm	Loop between P28 to K50	Cbf1 family	Alignment to HLH.hmm	Loop between P28 to K50	Pho4 family	Alignment to HLH.hmm	Loop between P28 to K50	Genome source
Saccharomyces cerevisiae	Rtg3	KREFHNAVERRRRELIKQKIKELGQLVPDDLGKQIKPNKGIILDRTVEYLQYLA	PSLLNYDDLGKQIKPN	Cbf1	RKDSHKEVERRRRENINTAINVLSDLLP-----VRESSKAAILACAAEYIQKLK	VRESS	Pho4	KRESHKHAEQARRNRLAVALHELASLIP--QNVSAAPSKATTVEAACRYIRHLQ	AEWKQQNVSAAPS	Saccharomyces Genome Database
Wickerhamomyces ciferri	XP_011272801.1	RREFHNQVERRRRDLIKERIKELGVIVPDSDGKEIKPSKSVIINKTVEYVEHLH	PSLLLVDSDGKEIKPS	XP_011271993.1	RKDNHKEVERRRRENINSGIKELSTLLP-----TQDTNKSQILQRAIEYIKRLK	TQDTN	XP_011275851.1	KKASHKLAEQGRRNRMNQAIMELGDLIP-EQLQQTIPSKATTVELATRYILELK	EQLQQTISIPS	GCA_000313485.1 ASM31348v1 (NCBI)
Yarrow lipolytica (CLIB122)	XP_505311.1	RRESHNAVERRRRDNINDRIQELSTLIPTPGTKDGRPNKGTILIKSVEYIKKLQ	ENFLNEPIIGGSPSLGPMGSPPPSQTPGTKDGRPN	YALI0_D24167g	RRDNHKEVERRRRETINDGINTLAELIA-----TSEKNKGQILKNAIEFIKQLK	TSEKN	YALI0F05126p	KRTSHKLAEQGRRNRINNALADLGKLLV---PESASTSKANTVENAIDYIRKLK	PESASTS	GCA_000149445.2 ASM14944v2 (NCBI)
Lipomyces starkeyi	ODQ75060.1	RRESHNAVERRRRDNINEKIQELASLIPAATGKDGKPNKGIILRKSVDYIRQLQ	EHLLAGTGFSSGGSGGGGVNSGSVGTEVSTPGGTAGTPSAVSAAATGKDGKPN	ODQ71232.1	RRDNHKEVERRRRETINEGITELAKIVP-----GCEKNKGSILQRAVQYIQQLK	GCEKN	ODQ75493.1	KRTSHKIAEQGRRNRINNALAELNQLLIEKNELPQQCSKANTVELAIDYIKKLQ	DNINLPISDDEGEKNELPQQCS	GCA_001661325.1_Lipst1_1_protein.faa (NCBI)
Tuber melanosporum	XP_002836960.1	RRESHNMVERRRRDNINERIQELSHLVPTGEEKDKGPNKGDILNGAVGWTRDLM	QHRLEDEKVRKHLVNNGSLSPSVGPSGSPPRATSMLAGGVGRRASGVPTSAGITGEEKDKGPN	XP_002838135.1	RRDNHKEVERRRRETINEGINELAKIVP-----GCEKNKGSILQRAVQYIQQLK	GCEKN	XP_002842394.1	KRTSHKIAEQGRRNRINNALTEIASLLPGGSAGAGQASKASTVEMAIDYIKQLK	QKATPSSSGGGSNSDGGGGGEGRSSINGGGGGGGGGGSAGAGQAS	GCF_000151645.1_ASM15164v1 (NCBI)
Neurospora crassa	XP_011393011.1	RRESHNLVERRRRDNINERIQDLSKLVPPIEEKDKGPNKGDILNGAVSWTRDLM	AHRLEDEKIRKAIQNGTPLSPTLAGISSPSQATSALAGPGARRAAGSTAGNITTGLPIEEKDKGPN	XP_011393982.1	RKDNHKEVERRRRETINEGINELAKIVP-----GCEKNKGSILQRAVQFITQLK	GCEKN	XP_963957.2	KRTSHKIAEQGRRNRINSALQEIATLLP--KAPAIPNSKASTVEMAIEYIKQLQ	KAPAKEGGDGDGDGHSSSGGGGGSGGADREDKREKDKDKAGGGIPNS	GCF_000182925.2_NC12 (NCBI)
Aspergillus nidulans	XP_680930.1			XP_681003.1	HKEGTCSVERRRREAINEGINQIARLVP-----NCDKNKGAILQRAIEYINQLH	NCDKN	XP_681540.1	KRTNHKLAEQGRRNRINTALKEIETLIPKERTGNQPISKASTVEMAIDYIKSLK	AAYVQMRLHKEAATCNGKGEKEKERTGNQPIS	GCF_000149205.2_ASM14920v2 (NCBI)
Taphrina deformans				jgi|Tapde1_1|1414	RKVNHKEVERKRRQTINEGLDELAKLIA-SPHSQPEKNKGAVLQKAVNYIIELK	SPHSQPEKN	jgi|Tapde1_1|1371	RRTSHKAAEQKRRDHLKECFELLRMILP--DRPEPGASKVAILKKGYEHILSLH	DRPEPGAS	Tapde1_1_GeneCatalog_proteins_20130601 (JGI)
Saitoella complicata	XP_019021506.1	RRESHNAVERRRRDNINEKIKELANLLPEAKLEKERTNKGIVLSKSVDHIRYLN	MEDGSFPNVTGASERRNSTSGGDGEGGAGGNKRSPGAEAKLEKERTN	XP_019025661.1	RRDNHKEVERRRREMINDGINALASLVP-----RCEKNKGSILQRAVEHIKELQ	RCEKN	XP_019026520.1	LRVSHKIAERKRRREMKDLFDDLRDNLP--VDKTLKTSKWEILSKAIEYISNLR	VDKTLKTS	GCF_001661265.1_Saico1 (NCBI)
Schizosaccharomyces pombe				NP_593944.1	KRLSHKEVERRRREAISEGIKELANIVP-----GCEKNKGSILQRTAQYIRSLK	GCEKN				GCF_000002945.1_ASM294v2 (NCBI)
Schizosaccharomyces japonicus				XP_002172592.1	RKMSHREVERRRRETINEGIQELAKIVP-----GCEKKKGSIIQRAIQYINTLK	GCEKK				GCF_000149845.2_SJ5 (NCBI)
Atractiellales rhizophila	jgi|Atrsp2|1357463	RRESHNLVERRRRDNINERIAELATLIPQALAAQSKLNKGSILTKTVQYIRNLQ	PAMLEFNPDLDDPEGRQKSSQALAAQSKLN	jgi|Atrsp2|1214945	KKDNHKEVERRRRETINDGINELKKIVP-----GCDKNKGSILQRAVQYLLQLK	GCDKN	jgi|Atrsp2|1328552|gm1.927_g	RKTSHKAAEQKRRDSLKHCFDDLRKILPDPSNPNKGVSKVALLRRSNEYILKLH	PIVLLMGDNEDERRPGEGNVGGQRSGHVDPSNPNKGVS	Atrsp2_GeneCatalog_proteins_20130826 (JGI)
Ustilago maydis	XP_011389354.1	RRESHNAVERRRRDNINGKITELATLLPALAAAQAKPNKGIILRKSVEYIRHLQ	EAMLLDAIVTSTQGGNSGTFAPALAAKAALAAAEAAAAKGETMQDGSQGHLRLPKSSTEAYAAALAPVKANSAALAAAQAKPN	XP_011388733.1	RKDNHKEVERRRRSAINDGIVQLSHIVP--GCDAKNTNKGAIIHAAVRYIQDLK	GCDAKNTN	XP_011389259.1	RRTSHKAAEQKRRDSLKFCFDELRGLLPMARSANKAISKVALLRHSNEYLVRMK	AITLDEDAPNGSLLGPDGAEEDREAEHFDPADVGDPDMARSANKAIS	GCF_000328475.2_Umaydis521_2.0 (NCBI)
Pseudozyma antarctica	jgi|Psean1_1|83473	RRESHNAVERRRRDNINEKITELATLLPALAAAQAKPNKGIILRKSVEYIRHLQ	EAMLLDAIATSTQGGNSGTFAPALAAKAALAAAAAAAAKGEAVTGGPDGQTSLPKSSTEAYAAALAPVHANSAALAAAQAKPN	jgi|Psean1_1|82136	RKDNHKEVERRRRSAINDGITQLSMIVP--GCEEKNTNKGAIIHAAARYIQDLK	GCEEKNTN	jgi|Psean1_1|79106|PANT_5c00027	RRTSHKAAEQKRRDSLKFCFDELRGLLPMARSANKAISKVALLRHSNEYLIRLK	AITLDEDAPNGSLLGPDGVEEDREAERFNPADVGDPEMARSANKAIS	Psean1_1_GeneCatalog_proteins_20140109 (JGI)
Cryptococcus neoformans (Grubbi H99)	XP_012051940.1	RRECHNLVEKRRREHINAKIEELGTLLPAKSQKDAAHCKGRILSQSVSYIRDLK	EKYNQIDEPAEEEDEDGKTTAKKKKNKRGGNTSAKSQKDAAHC	XP_012049467.1	RKDNHREVESRRRQAIADGIAEIAQLLP--SPPAPKEGKGQLLKRAVTYIHELL	SPPAPKEG	XP_012047121.1	RKISHKAAEQKRRDSLKAGFDELRLLLPPDDNPNRGVSKVALLRFGNEYIGKLQ	PINTEALDPLSGEPIPGSSAPRLLPKSSLVPDDNPNRGVS	GCF_000149245.1_CNA3 (NCBI)
Laccaria bicolor	XP_001882321.1	RRESHNAVERRQRDNINEKISELATLIPQ-----QKANKGMILRKSVEYIRYLQ	ECMLDVGGPNRNASSPSAASPSGGGIMSNGLLDPDSLLTPVDVLNGLNSPNPSANGLNGTPTRKDSLGEEGGGQQQGGDGGVVKAN	XP_001879735.1	RKDNHKEVERRRRGNINEGINELGRIVP---NGSGEKAKGAILSRAVQYIHHLK	NGSGEKA	XP_001881147.1	RKTSHKAAEQKRRDSLKTTFDDLRGLLPGGEGPNKGVSKLQLLICGNDYIRALK	PISLPELPSPTDDPNNPVPARPLLPGALPPRGPPKAGGEGPNKGVS	GCF_000143565.1_V1.0 (NCBI)
Serpula lacrymans				XP_007314890.1	RKDNHKEVERRRRGNINEGINELGRIVP---NSSGEKAKGAILSRAVQYIHHLK	NSSGEKA	XP_007313937.1	RK-SHKDAEQKRRDSLKTTFDDLRILLPGGEGPNKGVSKLQLLRCGNDFIRVLK	PIPLPSDENFPDTPILPGALPPRGPPKAGGEGPNKGVS	GCF_000218685.1_v1.0 (NCBI)
Rhizophagus irregularis	XP_025170451.1	RRESHNAVERRRRDNINEKIQELSTLLPLYVDSANKPNKGVILRKSVDYIRRLQ	DLYVDSANKPN	XP_025183259.1	RRENHKEVERRRRDTINAGINELAKIVP-----GCEKNKGSILNRAVQYIQQLK	GCENKN	XP_025175129.1	RRTTHKAAEQKRRDSLKQSFDELKKVVPKSDGSMKNVSKLFLLKRAHDYIVELE	YQSTLNKSNSNSGDVKNNDNKNNINGKSDGSMKNVS	GCF_000439145.1_ASM43914v3 (NCBI)
Mortierella verticillata	KFH66777.1	RRESHNAVERRRRDNINEKIQELSTLLPECYVDSAKPNKGVILRKSVDYIRHLQ	ECYVDSAKPN	KFH62687.1	RRDNHKEVERRRRETINQGITELATIIT-----CTEKNKGQILKEAVKYIQGVQ	CTEKN	KFH68301.1	RRTSHKAAEQKRRDSLKHCFDDLRHMIP--NIVDKAPSKVFLLKKSFDYICQLK	NIVDKAPS	GCA_000739165.1_Mort_vert_NRRL_6337_V1 (NCBI)
Rhizopus delemar	EIE91359.1	RRESHNAVERRRRDNINERIQELCALLPQANTNGRAINKGTILKLSVDHIKELR	ERLIEAAPTSSNVMSVTNGQANTNGRAIN	EIE77544.1	RRESHKLVERKRREAINDGINEIARIVP-----GCEKNKGSILSRAVSYIKQLK	GCEKN	EIE76266.1	RRTAHKAAEQKRRDSLKEWFDKLRREVESCSDTMKPLSKVLLLQYAYEYIASLK	DGYVKRQKSLMSQVIQAQELEGDKSTEDDEGSCSDTMKPLS	GCA_000149305.1_RO3 (NCBI)
Phycomyces blakesleeanus	XP_018293054.1	RRESHNAVERRRRDNINERIQELSTLLPQSGANGKAINKGTILKLSVDHIKDLR	EHLLESAPTSSNVMSTVNSQSGANGKAIN	XP_018288721.1	RRENHKQVERRRRETINDGINEIARIVP-----GCEKNKGSILQRAAAYIRQLK	GCEKN	XP_018290158.1	RRTAHKAAEQKRRDSLKEWFERLRREVEESDAVLKPLSKVLLLRYAYEYISTLK	DGYVKKKSGLASIVIREQEREARGEIEDTSGGESSKTRQSSADEADHSEGADESDAVLKPLS	GCF_001638985.1_Phybl2 (NCBI)
Coemansia reversa	PIA17658.1	RRESHNAVERRRRDNINDRIQELYMLLPTMIDLNMKPNKGVILKKSVEYIRQLK	ETMIDLNMKPN	PIA14159.1	RRDSHKEVERRRREVINHGIDSLAELIP-----GAEKNKGRIIAQAVDYIGRLR	GAEKN	PIA13359.1	RRKNHKNAEQKRRDSLKVCFQDLHERLPEVDP--KLVSKIYLLKKATSYIDQLH	EVDPKLV	GCA_002705745.1_Coere1 (NCBI)
Conidiobolus coronatus	KXN70862.1	RRESHNAVERRRRDVINDRIQELANLLPQNSIPAHKFNKGTILTQSVNYIKYLQ	QNSIPAHKFN	KXN75101.1	RRENHKEVERRRRESINDGINELARLVP-----GCEKNKGSILNRTVQYIHEVR	GCEKN				GCA_001566745.1_Conidiobolus_coronatus_NRRL28638 (NCBI)
Catenaria anguillulae	ORZ39615.1	RRESHNAVERRRRDNINERIAELGLLLPVGSDPNVKPNKGQILRKVVDYVRHVQ	EYYVGSDPNVKPN	ORZ38047.1	RRESHKEVERRRREVINTGINELAKIVP----NCSDRNKGGILLRAVQYIQQLK	NCSDRN	ORZ35577.1	RKNSHRYAEQKRRNAMKDGFDELRRLVPDAKNEGKGISKIMVLKAAYDYCAFLA	GLQNSVTTRRSKYNPIEPQPPVSRKKRRDAKNEGKGIS	GCA_002102555.1_Catan2 (NCBI)
Blastocladiella britannica	jgi|Blabri1|278725	RRESHNAVERRRRDNINERISELGLLLPVGSDPAVKPNKGQILRKVVDYVRHVQ	EYYVGSDPAVKPN	jgi|Blabri1|335476	RRESHKEVERRRREVINTGISELAKIVP----NCSDRNKGGILHRAVQYIQQLK	NCSDRM	jgi|Blabri1|180217	KKNTHRFAEQKRRNAMKDGFDELRRRIPDAKNEGKGISKIMVLKAAYDYCAFMS	GLQNSVTNRKSKFGGGAAAAPEPPEPLGAGARRRRGRDAKNEGKGIS	Blabri1_GeneCatalog_proteins_20160901 (JGI)
Allomyces macrogynus	KNE61282.1	RRESHNAVERRRRDNINERIQEMGLLLPGSDASTAKAHKGQILRKAVDYVGDLQ	ETYTGSDASTAKAH	KNE59978.1 (7)	RRESHKEVERRRREVINTGIAELAKIVP----NCSDRNKGGILHRAVQYIQQLK	NCSDRN	KNE58081.1	KRAVHKDAEQKRRSAMKNGFDELRLIIPQEKAMGKSISKLMVLKTAHDYILFLK	GLQFSVTTRRSKYNPHVPTAAERRRRSKQEKAMGKSIS	GCA_000151295.1_A_macrogynus_V3 (NCBI)
Batrachochytrium dendrobatidis	XP_006676704.1	RRESHNAVERRRRDHINEKIHELSNLLPEFASD-IKPNKGVILRRSVDYIRHMQ	EFASDIQNKPN	XP_006682340.1	RRENHREVERKRRETISDGIAELAKLVP-----DGDKNKGSVLQRAVQYIMNLK	DGDKN	XP_006675343.1	RKSTHKQAEQLRRDTLKSCFDEIRSLLP--PIAEKLPSRVVVIRAAHDYITTLH	PIAEKLP	GCF_000203795.1_v1.0 (NCBI)
Spizellomyces punctatus	XP_016606064.1	RRESHNAVERRRRDNINEKIQELATLLPDFASDSQKPNKGVILRRSVEYIKQMQ	DFASDSQNKPN	XP_016606744.1	RRENHKEVERRRRETINDGINELAKLIP-----EGEKNKGRILSRAVQYIHQLK	EGEKN	XP_016606213.1	RRDCHKQAEQRRRDSLKQCFDELRRVLP--PIHEKNPSKVVVLKKCCEYIADLQ	PIHEKNPS	GCF_000182565.1_S_punctatus_V1 (NCBI)
Piromyces sp. E2	OUM61206.1	RRESHNAVERRRRDNINEKIHELSTLIPNGEGPVGKPNKGIILRKSVEYIKHLQ	EHILNPNNGEGPVGKPN	OUM64305.1	RRANHKEVERRRRETINEGINELAKLIP-----EDEKNKGRIIARAVQYIQHLK	EDEKN	OUM68026.1	RKTNHKNAEQKRRDSLKQGFENLKVIVP--FISDKNPSKIMIITRSYEYICKLK	FISDKNPS	GCA_002157105.1_PirspE2_v1.0 (NCBI)
Neocallimastix californiae	ORY83399.1	RRESHNAVERRRRDNINEKIHELSTLIPNGEGPVGKPNKGIILRRSVEYIKHLQ	EHILNPNNGEGPVGKPN	ORY30858.1	RRANHKEVERRRRETINEGINELAKLIP-----EDEKNKGRIIARAVQYIQRLK	EDEKN	ORY37529.1	RKTNHKNAEQKRRDSLKQGFENLKIVVPFFSSFDKNPSKIMIITRSYEYICELH	FFSSDKNPS	GCA_002104975.1_Neocallimastix_sp._G1_v1.0 (NCBI)
Rozella allomycis				EPZ36235.1	KGETH--VERRRRDYINEGFFQLQKSLP-SFLFEEKMNRGSILHRSLEHIKFLQ	SFLFEEKMN	EPZ35847.1	RRSHHKAAEQKRRDCIKQCFQELRKMLP--MDKDKQPSRMEILQKAYEYIIELQ	MDKDKQPS	GCA_000442015.1_Rozella_k41_t100 (NCBI)
Paramicrosporidium saccamoeba	PJF19915.1	RKENHNLVERRRRDLINIMIARLALLVSLDTNAASKMNKGEILEASVRKILQVN	AHSGGLDTNAASKMN	PJF19414.1	RRQAHIASEQKRRQSINEGFEDLRRVIP--SCTDTSDSKAVVLRKAVNYIRLLQ	SCTDTSDS				GCA_002794465.1_KSL3_v6
Fonticula alba	XP_009497150.1	RREVHNAVERRRRDNINDRIADLSFLVPGSGSTRGSANKGTILRKSADYIRYLH	DCLPDPAMDDYESFTFPAPDRPSIGEAAAAGTSTSGGSGSTRGSAN	XP_009494685.1	RRDNHRDVERRRREAINHGINELGKLLP-GNTPVPKNNKGAILHKAVEYVRYLQ	GNTPVPKNN	XP_009495523.1	RRFAHQNAEQKRRNHIKQAFLDLRLAIP-ETRDKKTVSKAQILHSATVYIAENE	ETRDKKTV	GCF_000388065.1_Font_alba_ATCC_38817_V2 (NCBI)
Sphaeroforma artica	XP_014152861.1	KKASHNAIERKRRYNINDRIKELQEMLPALSRSKIKQCKGSTLKRSIDYIRYLE	AVALSRSKIKQC				XP_014151774.1	RRSAHILAEQKRRNNIKVGFEELQQIIPCQVTPNSKFSKASILQKAIDYVGYLI	SCQVTPNSKFS	GCF_001186125.1_Spha_arctica_JP610_V1
Capsaspora owczarzaki	XP_004364214.2	KKDNHNAIERRRRYNINDRIVELGSLLP-NAEIDPKASKGSILKRSVDYIKYLQ	NAEIDPKAS				XP_004345278.1	RRNAHIQAEQKRRNNIKAGFDELQVMIPCQKSPASRQSKATVLHKAVDYIHHLV	ACQKSPASRQS	GCF_000151315.2_C_owczarzaki_V2
Drosophila melanogaster	Mitf	KKDNHNMIERRRRFNINDRIKELGTLLP--KGSDARPNKGTILKSSVDYIKCLK	KGSDAFYEVVRDIRPN				Bigmax	RREAHTQAEQKRRDAIKKGYDSLQELVPRCQPNDSKLSKALILQKSIEYIGYLN	RCQPNDSSGYKLS	Drosophila_melanogaster.v6.aa.fasta
Mus musculus	Mitf	KKDNHNLIERRRRFNINDRIKELGTLIPKSNDPDMRWNKGTILKASVDYIRKLQ	KSNDPDMRWN				Max-like protein X	RRRAHTQAEQKRRDAIKRGYDDLQTIVP-TCQQQDKLSKAIVLQKTIDYIQFLH	TCQQQDFSIGSQKLS	GCF_000001635.27_GRCm39_protein.faa
Species	MITF family						MLX family
