# Supplementary material for: Competition for DNA binding between paralogous transcription factors determines their genomic occupancy and regulatory functions
Source: HighWire-hosted journal article supplement (doi:10.1101/gr.275145.120), 2021-05-11
Supplement: Supplemental_Table_S2.xlsx [file Supplemental_Table_S2.xlsx]

## Sheet: README
Supplemental Table S2. PBM and competition PBM data. (A) Genomic-context PBM data for Cbf1 and Pho4, shown in Fig. 1C. (B) The TF concentrations used in the competition PBM experiments. (C) The full competition PBM data for Cbf1, shown in Fig. 2B. (D) Competition PBM data for the sites highlighted in blue and red in Fig. 2B,C. (E) The full competition PBM data for Pho4, shown in Fig. 2C. (F) GST-…

## Sheet: A. Data for Fig1C
Probe ID	Probe Sequence	Cbf1 binding levels (FI)	Pho4 binding levels (FI)
NCPTY_D163	CTATTATTGAAAGTGAACGTGATCCAGAACCGCTTCGTCTTGATTCGCTTGACGCTGCTG	6036.07	3634.79
NCPTY_D1768	CTACAGGCAGCAAAAAACGTGATAGTAAAGCTATTCGTCTTGATTCGCTTGACGCTGCTG	5051.23	6491.82
NCPTY_D1808	GAATTTTGTAACGAGCACGTGATTTACAGGGCGTAGGTCTTGATTCGCTTGACGCTGCTG	59515	25236.6
NCPTY_D1852	CTATCATCTTCCTGGAACGTGACTTCCGTAGGCTTCGTCTTGATTCGCTTGACGCTGCTG	9261.4	5208.11
NCPTY_D1880	CTAAAGAAACGCGGTCACGTGAGCAAAATCGAATTCGTCTTGATTCGCTTGACGCTGCTG	66123.3	11437.3
NCPTY_D1945	GAAACTTTTTCGTTTAACGTGACGCATGGTGCGTAGGTCTTGATTCGCTTGACGCTGCTG	1150.68	2915.47
NCPTY_D2520	CTACATTGCCACTATCACGTTGTCAAACTTTGCTTCGTCTTGATTCGCTTGACGCTGCTG	2277.67	7049.76
NCPTY_D3099	GAAGTCACGTACGATAACGTGATCCTGCCACAGTAGGTCTTGATTCGCTTGACGCTGCTG	5431.84	3079.22
NCPTY_D397	CTATCCTATTCTTATCACGTTATTGTTTACTTATTCGTCTTGATTCGCTTGACGCTGCTG	6314.6	3838.66
NCPTY_D464	CTAGGTTCTTAAGATCACGTTAGCATCCTGTTGTTCGTCTTGATTCGCTTGACGCTGCTG	2485.01	2141.73
NCPTY_D5548	GAATAATTTTCAGGACACGTGTTTCGAAAGGTTTAGGTCTTGATTCGCTTGACGCTGCTG	42292.2	28820.2
NCPTY_D5731	CTACCAGAGATGCTCCACGTGAAAGATCACCAATTCGTCTTGATTCGCTTGACGCTGCTG	6078.39	10017.6
NCPTY_D6023	CTAGTAAAAGTACGGCACGTGACCTTCCTGGTATTCGTCTTGATTCGCTTGACGCTGCTG	43717.6	22461.7
NCPTY_D637	GAACTGGAAATCCAAAACGTGATCGTGAGCCACTAGGTCTTGATTCGCTTGACGCTGCTG	6739.53	5263.63
NCPTY_N1010	CTATATGAGCGAGGAAACGTGATTGAGAGTTATTTCGTCTTGATTCGCTTGACGCTGCTG	2940.44	6420.29
NCPTY_N1126	GAAGGTGCCGTTTGTCACGTGGGACGGGATGCGTAGGTCTTGATTCGCTTGACGCTGCTG	21840.9	18586.3
NCPTY_N118	GAAACGCATAATTCTAACGTGACAAATGTTGTTTAGGTCTTGATTCGCTTGACGCTGCTG	708.086	2545.39
NCPTY_N1308	CTATCATTGAAAAGGAACGTGATACAGACGTAATTCGTCTTGATTCGCTTGACGCTGCTG	2317.3	7666.11
NCPTY_N1395	CTACCACTTTTTTATCACGTTTCTTAGCGTTATTTCGTCTTGATTCGCTTGACGCTGCTG	5426.95	7161.38
NCPTY_N1419	GAACAGTTATACTATCACGTTGCACCTGGGGCCTAGGTCTTGATTCGCTTGACGCTGCTG	1457.91	4991.86
NCPTY_N1482	CTACACAAGGAATAACACGTGACATTTTTCTTTTTCGTCTTGATTCGCTTGACGCTGCTG	50564.5	23358
NCPTY_N1582	CTACATAGAATTGTTCACGTGGTCTAAATATGTTTCGTCTTGATTCGCTTGACGCTGCTG	28598.3	18298.2
NCPTY_N1589	GAAAGTCACTTTAACCACGAGGGGAAAAAACACTAGGTCTTGATTCGCTTGACGCTGCTG	364.597	9455.3
NCPTY_N1678	GAATTGCTTAGAGTGAACGTGATAGCTTTACGGTAGGTCTTGATTCGCTTGACGCTGCTG	1432.69	4264.98
NCPTY_N1749	CTAAGCATTTTTTATCACGTTATTCGGTGACACTTCGTCTTGATTCGCTTGACGCTGCTG	5533.03	3120.83
NCPTY_N1846	GAAGCTGATACAGGGCACGTGAGAGGTCACTGATAGGTCTTGATTCGCTTGACGCTGCTG	24713.4	14242
NCPTY_N1863	GAAATATCCTGCACTGACGTGTCACAAGAAAAATAGGTCTTGATTCGCTTGACGCTGCTG	156.754	1920.51
NCPTY_N1869	CTAGCTTAAAAAGGTCACGTGAAGCTCTATTTTTTCGTCTTGATTCGCTTGACGCTGCTG	54977.5	8762.27
NCPTY_N1923	CTAGCAATGGCGATTCACGTGTTCGGTAACCACTTCGTCTTGATTCGCTTGACGCTGCTG	14287.8	11776.8
NCPTY_N1963	GAATCTTTTGTACATCACGTTTCACTATATATTTAGGTCTTGATTCGCTTGACGCTGCTG	12221.5	6576.65
NCPTY_N1993	GAAGAACAATTGTGAAACGTGATCAATTCGTGTTAGGTCTTGATTCGCTTGACGCTGCTG	24051.9	6795.44
NCPTY_N1996	CTACAGCATATACGTCACGTTCTGCTCATCGTGTTCGTCTTGATTCGCTTGACGCTGCTG	7139.05	6477.01
NCPTY_N2042	GAAATTAATGTTTATCACGTTATTATTTTTTTGTAGGTCTTGATTCGCTTGACGCTGCTG	4441.58	3747.99
NCPTY_N2068	GAAGGTTTTAAAAGTCACGTGCTTAAGTCCATTTAGGTCTTGATTCGCTTGACGCTGCTG	54533.2	22974.4
NCPTY_N2316	CTATTATGAAAAGGGAACGTGATATAAAAAAACTTCGTCTTGATTCGCTTGACGCTGCTG	14345.5	7977.82
NCPTY_N2403	GAATCTATATCGGGAAACGTGATTGATTGCGCATAGGTCTTGATTCGCTTGACGCTGCTG	4671.45	6326.38
NCPTY_N2512	GAATAAGTAATTTCTAACGTGATAAAGTAGTTATAGGTCTTGATTCGCTTGACGCTGCTG	343.645	2084.5
NCPTY_N261	CTAGGCATCGTCTCTCACGTGAAATCTGTGGGGTTCGTCTTGATTCGCTTGACGCTGCTG	14543.9	4985.02
NCPTY_N2655	GAATTACTGAAGCCTCACGTGAGGGCAATCTGGTAGGTCTTGATTCGCTTGACGCTGCTG	13024.1	6726.37
NCPTY_N2862	CTAAAGAAAATAAAGAACGTGATAATGATGAATTTCGTCTTGATTCGCTTGACGCTGCTG	3083.25	7696.46
NCPTY_N2891	CTATGTTGAATGTGACACGTAACTCTAGGCCATTTCGTCTTGATTCGCTTGACGCTGCTG	127.1	2116.75
NCPTY_N2911	GAATCTTTCTTCTTTCACGTGTTCTTTTTGTCTTAGGTCTTGATTCGCTTGACGCTGCTG	28817.6	11694.7
NCPTY_N2979	GAAATGAGAAGAGAACACGTGAAGAACTTAGGGTAGGTCTTGATTCGCTTGACGCTGCTG	22672.7	11120.3
NCPTY_N3065	GAAGTTATCATTTACCACGAGGTTGACTGTCTTTAGGTCTTGATTCGCTTGACGCTGCTG	145.448	8348.25
NCPTY_N3069	GAAAGGTTAAGTGGAAACGTGATAAACTGCGGCTAGGTCTTGATTCGCTTGACGCTGCTG	2160.54	5879.33
NCPTY_N3243	GAAAATGTAATTTCTCACGTGTTCCTTTAGCAGTAGGTCTTGATTCGCTTGACGCTGCTG	22318.9	13122.6
NCPTY_N3266	CTATGAGGAAAAAATCACGTTAAATAGTTTCATTTCGTCTTGATTCGCTTGACGCTGCTG	362.535	1673.96
NCPTY_N3281	GAAAGCGGTTTTAATCACGTTACCGTTTATTTCTAGGTCTTGATTCGCTTGACGCTGCTG	30223.4	2701.1
NCPTY_N3290	GAAGCTTTTAATTATCACGTTGCCACTTTAACATAGGTCTTGATTCGCTTGACGCTGCTG	7031.32	6457.64
NCPTY_N3378	CTATGGGATAACCGTCACGTGACTCTCACTAGGTTCGTCTTGATTCGCTTGACGCTGCTG	53915.2	15091.9
NCPTY_N3398	CTACTGGCCTCTGATCACGTTACTTTATTACCCTTCGTCTTGATTCGCTTGACGCTGCTG	27709.1	3147.22
NCPTY_N3436	GAACCAGATTGCCCTCACGTGAGGCTTCAGTAATAGGTCTTGATTCGCTTGACGCTGCTG	30151.2	7543.09
NCPTY_N3441	GAAAATCATTACCAAAACGTGACGATTAACATATAGGTCTTGATTCGCTTGACGCTGCTG	13231.9	8073.66
NCPTY_N3535	GAAGAATCTTCGTCTCACGTGGTTTCTCAGCGTTAGGTCTTGATTCGCTTGACGCTGCTG	24104.3	11577.1
NCPTY_N3650	GAACGAGTGATGCGACACGTGATAGGTAGTAACTAGGTCTTGATTCGCTTGACGCTGCTG	37005.1	12804.4
NCPTY_N3701	CTAGTGACTATTGAGCACGTGAGTATACGTGATTTCGTCTTGATTCGCTTGACGCTGCTG	30555.2	18621.2
NCPTY_N3710	CTACATGCCAATTCGCACGTGACTTGAAACTATTTCGTCTTGATTCGCTTGACGCTGCTG	61719.5	19995.2
NCPTY_N3788	GAAGTTACTGTGGTTCACGTGATTCAAGTGTGCTAGGTCTTGATTCGCTTGACGCTGCTG	41051	8024.65
NCPTY_N3890	CTACTGATTACGGATCACGTTCAAATTGGTAAATTCGTCTTGATTCGCTTGACGCTGCTG	5825.4	3448.67
NCPTY_N4005	CTAAGACAGTGACAAAACGTGATAGATTACATATTCGTCTTGATTCGCTTGACGCTGCTG	2887.48	6591.94
NCPTY_N4026	GAATATTTCCCGTGTAACGTGATATATTTGTGATAGGTCTTGATTCGCTTGACGCTGCTG	12612.8	2795.52
NCPTY_N4205	GAAGTCTATAGTGCAAACGTGATCAATGTAAAGTAGGTCTTGATTCGCTTGACGCTGCTG	10340.1	5059.52
NCPTY_N422	GAATGAATTTTCATTCACGTGATCTACATTCCCTAGGTCTTGATTCGCTTGACGCTGCTG	72925.1	9766.13
NCPTY_N4327	GAAAACACCAAAAATCACGTTTTCAAAATATGTTAGGTCTTGATTCGCTTGACGCTGCTG	10379.9	6063.57
NCPTY_N4506	GAATGTTCTCTCTTTCACGTGATAAGGTTTGCATAGGTCTTGATTCGCTTGACGCTGCTG	24976	9035.77
NCPTY_N4586	CTAAATGGTAATCAAAACGTGATCGCTTATATTTTCGTCTTGATTCGCTTGACGCTGCTG	12750.7	6708.92
NCPTY_N475	GAATCTAATAGGAGTCACGTGGTTCCATCGTTTTAGGTCTTGATTCGCTTGACGCTGCTG	48681.5	17712.9
NCPTY_N4767	CTATTCAGAGATGATCACGTGATATAAACGTGATTCGTCTTGATTCGCTTGACGCTGCTG	68468.8	13370.6
NCPTY_N4893	CTATTATGCATATGAAACGTGATATCCACCGTTTTCGTCTTGATTCGCTTGACGCTGCTG	3878.52	5782.19
NCPTY_N4905	GAACGTGGAGCGCTTCACGTGAAAAGAGTGGCCTAGGTCTTGATTCGCTTGACGCTGCTG	8135.74	5051.56
NCPTY_N5018	GAAAGAAATAAACATCACGTGATATGTAATACCTAGGTCTTGATTCGCTTGACGCTGCTG	38446.3	13010.7
NCPTY_N5103	GAAACTCTTCTTCGACACGTGTCGAGAAAAAAATAGGTCTTGATTCGCTTGACGCTGCTG	19265.3	19715.4
NCPTY_N5128	CTATTCCAACACCATCACGTTATCAATTCTTTCTTCGTCTTGATTCGCTTGACGCTGCTG	4160.16	3346.59
NCPTY_N5206	GAAAAGTTGTACATTCACGTGGGCCTTATCGCCTAGGTCTTGATTCGCTTGACGCTGCTG	14668.4	15387
NCPTY_N5211	GAATACTGTTTTCGTCACGTTCCGAACAGCAGCTAGGTCTTGATTCGCTTGACGCTGCTG	2722.87	5783.82
NCPTY_N5425	CTAAAAAATTTTTATCACGTTTCTTTTTCTTGATTCGTCTTGATTCGCTTGACGCTGCTG	4387.47	7288.39
NCPTY_N562	GAACAGTTATGTCATAACGTGATTTTTACAATATAGGTCTTGATTCGCTTGACGCTGCTG	7387.88	2350.55
NCPTY_N5748	CTAAATTATTATTATCACGTTTCACGGATTATTTTCGTCTTGATTCGCTTGACGCTGCTG	7997.11	5813.82
NCPTY_N579	GAAAGCTACCAATAAAACGTGATAGATACTAACTAGGTCTTGATTCGCTTGACGCTGCTG	2890.95	5760.55
NCPTY_N586	CTATAAGCTATTTGTCACGTTACTATTTCTCTCTTCGTCTTGATTCGCTTGACGCTGCTG	13919.3	3241.3
NCPTY_N5921	CTAACAAAGTTGGGTCACGTTTCTCGCAATTATTTCGTCTTGATTCGCTTGACGCTGCTG	22823.4	5117.65
NCPTY_N5996	CTAGCTTAATGGAATAACGTGATTTTTGTACCATTCGTCTTGATTCGCTTGACGCTGCTG	7250.19	2460.21
NCPTY_N6037	GAACTTTTTCCTTATCACGTTGAGCCATTAGTATAGGTCTTGATTCGCTTGACGCTGCTG	1814.12	5016.32
NCPTY_N6040	GAACTCACTTTCTGTCACGTGCTCGCATTGCGATAGGTCTTGATTCGCTTGACGCTGCTG	52074.6	31335.7
NCPTY_N6079	GAAATTATGGTATCCCACGTGATTGAGTGTAACTAGGTCTTGATTCGCTTGACGCTGCTG	31598.2	18076.8
NCPTY_N6152	CTACACAATTCAAGTCACGTGGAAAGGCCTTCATTCGTCTTGATTCGCTTGACGCTGCTG	66254.3	16548.9
NCPTY_N6154	GAAATGAATACCCTAAACGTGATAAGTTTGTGCTAGGTCTTGATTCGCTTGACGCTGCTG	1320.57	5519.03
NCPTY_N6211	GAATAAAAAAATAAAAACGTGATCCGTACTTATTAGGTCTTGATTCGCTTGACGCTGCTG	25314.9	9361.46
NCPTY_N6239	GAAAAACGGGCCTCCCACGTGACGTAAAGTAGGTAGGTCTTGATTCGCTTGACGCTGCTG	42871.6	18266.5
NCPTY_N6330	GAAAAAAAATGCAATCACGTTTTCACATTTTTTTAGGTCTTGATTCGCTTGACGCTGCTG	11533.6	8129.47
NCPTY_N6446	GAACAGACCCTTCAGCACGTGACAGACAGCAAATAGGTCTTGATTCGCTTGACGCTGCTG	48190.7	16408.6
NCPTY_N6584	GAATTCCAATCGGAGCACGTGAATTTGTAACCATAGGTCTTGATTCGCTTGACGCTGCTG	25408.7	14389.8
NCPTY_N6680	CTATAAATTTGAAATTACGTGTCACTTCGTTTTTTCGTCTTGATTCGCTTGACGCTGCTG	148.809	2578.45
NCPTY_N6788	GAATCTGTGCTTACTCACGTGAAAGAGAGGGAATAGGTCTTGATTCGCTTGACGCTGCTG	15752.1	6606.84
NCPTY_N7081	GAAAACAAAGTTTATCACGTTGTTGGTACTTAGTAGGTCTTGATTCGCTTGACGCTGCTG	2431.48	5388.37
NCPTY_N7147	GAAATGGCACTTTCTCACGTGCCTTTCAGACTATAGGTCTTGATTCGCTTGACGCTGCTG	22226.7	13363.4
NCPTY_N7269	GAAGTTCCTTGCTATCACGTTTGTGCAAGGTATTAGGTCTTGATTCGCTTGACGCTGCTG	782.347	4863.91
NCPTY_N7325	CTAATTGCACCCGTGCACGTCACACATAAGCTTTTCGTCTTGATTCGCTTGACGCTGCTG	878.151	5216.93
NCPTY_N7354	CTAAAAACGAAGTGACACGTAATTTCAAATTTATTCGTCTTGATTCGCTTGACGCTGCTG	73.5213	1862.65
NCPTY_N7487	CTATTTGCGTTATGAAACGTGATGCTTCGATATTTCGTCTTGATTCGCTTGACGCTGCTG	2423.71	5828.92
NCPTY_N877	CTAATGTATTACTATCACGTGGGTGGGGAAGACTTCGTCTTGATTCGCTTGACGCTGCTG	38012	17890.8
NCPTY_N959	GAATATAAACACGATCACGTTTCACTCTTGAAATAGGTCTTGATTCGCTTGACGCTGCTG	16332.9	6761.49
NCPTY_N993	CTATTCTTGGTGGACCACGTGCCTTGCTTAAAGTTCGTCTTGATTCGCTTGACGCTGCTG	23980.4	28806.4
NCPT_D1093	GAATCTCAGACCCTGAACGTGACCGTCCATCATTAGGTCTTGATTCGCTTGACGCTGCTG	3140.37	3716.53
NCPT_D1248	CTATCGCCCCAGTTACACGTGGGGACAATGGCGTTCGTCTTGATTCGCTTGACGCTGCTG	6392.42	16033.8
NCPT_D1271	GAACGTTTGTTGGAGCACGTGGGAAATCCCCAATAGGTCTTGATTCGCTTGACGCTGCTG	14477	21720.4
NCPT_D1318	CTAATTTAATAGTTCCACGTGGACGTGTTATTTTTCGTCTTGATTCGCTTGACGCTGCTG	13980.5	28892.4
NCPT_D1339	GAAATCCAGTGAATACACGTGTATATTTGACGGTAGGTCTTGATTCGCTTGACGCTGCTG	8507.43	21183.9
NCPT_D1397	GAAGAAACCCGTGGGCACGTGGCTGTTATATTTTAGGTCTTGATTCGCTTGACGCTGCTG	24165.9	26455.6
NCPT_D1708	CTACTCAAAACAGTGCACGTGCACCCATGGCATTTCGTCTTGATTCGCTTGACGCTGCTG	42558.5	26697.7
NCPT_D2271	CTATATCGACAGCTTCACGTGCCATTTGCCATTTTCGTCTTGATTCGCTTGACGCTGCTG	16961.6	13039.7
NCPT_D2350	GAAAAGAATCTCTTGCACGTGACGGTTTACTAATAGGTCTTGATTCGCTTGACGCTGCTG	53938.4	18994
NCPT_D2526	CTACCGTGGAAAGAGCACGTGCCTCGCTGGATCTTCGTCTTGATTCGCTTGACGCTGCTG	37810.2	25482.8
NCPT_D2800	CTACTGGCTTTTCTCCACGTGTCTGCTTGTTGCTTCGTCTTGATTCGCTTGACGCTGCTG	12197.9	20691
NCPT_D2983	GAATAATTTCCGCCCCACGTGCTGGAAATAACATAGGTCTTGATTCGCTTGACGCTGCTG	43755	37128.2
NCPT_D2994	GAAGAATTTCGTTGTCACGTTGTTTTGGTAAGTTAGGTCTTGATTCGCTTGACGCTGCTG	13561.5	6973.72
NCPT_D3024	GAAATGGTATGGGTGCACGTGGGATTCTAGGGGTAGGTCTTGATTCGCTTGACGCTGCTG	14531.8	28242.6
NCPT_D3213	CTATAGCGCTTTGATCACGTGCTCGGGCGCTATTTCGTCTTGATTCGCTTGACGCTGCTG	55081.4	15572.1
NCPT_D3285	GAACTGTTGCAAGCTCACGTGAAAATGTGGATTTAGGTCTTGATTCGCTTGACGCTGCTG	12317.8	5742.04
NCPT_D365	GAACTTCAAACAAACCACGTGATGGTCTACACGTAGGTCTTGATTCGCTTGACGCTGCTG	33862.6	14918.7
NCPT_D4028	GAAGGCCACGGAACGCACGTGGCGGGACTCGTATAGGTCTTGATTCGCTTGACGCTGCTG	8509.26	21740.1
NCPT_D4074	GAAGCCGTACTTTTACACGTGACCGTAGAGGCTTAGGTCTTGATTCGCTTGACGCTGCTG	57404.8	10655.7
NCPT_D43	CTAGCGGCGGAAAAAAACGTGACGCCTTTTAGCTTCGTCTTGATTCGCTTGACGCTGCTG	12202.3	5777.96
NCPT_D4530	CTAAGGCACACCCACCACGTGCCTGTTGGCTGATTCGTCTTGATTCGCTTGACGCTGCTG	11381.7	19024.8
NCPT_D5057	CTAAGCACACGCCCTCACGTGAGTGAATTTGCCTTCGTCTTGATTCGCTTGACGCTGCTG	29927	7825.22
NCPT_D5283	GAAAGAGGACCACCCCACGTGCCAGAATTGTTTTAGGTCTTGATTCGCTTGACGCTGCTG	17588.8	32598.9
NCPT_D5514	GAACTCCACGGTGAGAACGTGATGTGATAGCCGTAGGTCTTGATTCGCTTGACGCTGCTG	2651.85	5614.72
NCPT_D5798	CTATGCTTACCCTCCCACGTGCTAGATTTTTCGTTCGTCTTGATTCGCTTGACGCTGCTG	24189.4	27209.9
NCPT_D5813	CTATGCTTGTGAGTGCACGTGTATACGCTATGCTTCGTCTTGATTCGCTTGACGCTGCTG	26648.6	23816.6
NCPT_D6135	CTAGAGATGGGAGGCAACGTGATGTGGTTCATATTCGTCTTGATTCGCTTGACGCTGCTG	3091.37	5800.34
NCPT_D6300	CTATATCCTGGGCTGCACGTGATAATATGTTACTTCGTCTTGATTCGCTTGACGCTGCTG	31571.6	18259.8
NCPT_D6447	GAAAAGCTATTCAACCACGTGAAGATAGCAGGGTAGGTCTTGATTCGCTTGACGCTGCTG	19740.6	12585
NCPT_D6546	CTATGGCGACTTTTGCACGTGAACGACGTCCCCTTCGTCTTGATTCGCTTGACGCTGCTG	13286.8	11094.6
NCPT_D7029	GAACTGATATATATACACGTGAAGCAAAAAAGGTAGGTCTTGATTCGCTTGACGCTGCTG	18706.1	11258.7
NCPT_D7129	CTAGTAAATAACACACACGTGCTTACCCTACCATTCGTCTTGATTCGCTTGACGCTGCTG	22362.8	26447.7
NCPT_D7194	CTACTACCATGAATGCACGTGTCGCTGTCCTCATTCGTCTTGATTCGCTTGACGCTGCTG	11992.8	21827.3
NCPT_D7262	CTAGGTAGATCTCAGCACGTGTGCATGCGCATATTCGTCTTGATTCGCTTGACGCTGCTG	12541.8	25445.3
NCPT_N1005	GAACTCCCACCATTGAACGTGATTATGACTTCCTAGGTCTTGATTCGCTTGACGCTGCTG	478.46	2712.52
NCPT_N1084	CTATCTTGGCGTTCACACGTGGGTTTAAAAAGGTTCGTCTTGATTCGCTTGACGCTGCTG	14863.3	22059.2
NCPT_N1127	GAATGTTCCTCGATTCACGTGCTCAGTATCTTGTAGGTCTTGATTCGCTTGACGCTGCTG	28599.2	17383.2
NCPT_N1212	GAACTCAGTCTAGTGCACGTGAGATTACACTGCTAGGTCTTGATTCGCTTGACGCTGCTG	16624.4	12539.8
NCPT_N1267	CTAATAACGCCACAGAACGTGATCTGACTATTGTTCGTCTTGATTCGCTTGACGCTGCTG	5710.5	6075.09
NCPT_N127	CTAAAAAAGAAGTTGAACGTGATTTCATTTGTTTTCGTCTTGATTCGCTTGACGCTGCTG	3237.96	3468.3
NCPT_N1460	GAAACCAAAAAAGGGAACGTGACACGGCCTCGCTAGGTCTTGATTCGCTTGACGCTGCTG	6779.57	7945.3
NCPT_N150	GAAAGATAATTTTGTCACGTTTGTTCTGGTGGGTAGGTCTTGATTCGCTTGACGCTGCTG	4591.93	5023.67
NCPT_N1501	GAAAAGGAAGGTGTTCACGTTGTGAACTTTAATTAGGTCTTGATTCGCTTGACGCTGCTG	181.895	3549.45
NCPT_N151	CTATGGGGTGAGTGTCACGTGCACAACGACGGTTTCGTCTTGATTCGCTTGACGCTGCTG	35480.9	17770.9
NCPT_N1514	GAAAAAGGCGGGGCAAACGTGATGGCGCTTGCTTAGGTCTTGATTCGCTTGACGCTGCTG	335.998	4245.41
NCPT_N1527	GAAGTAGAATACGCACACGTGTACGCATGCTCCTAGGTCTTGATTCGCTTGACGCTGCTG	17944.3	21292.1
NCPT_N1556	GAATACTTTTCGTTCAACGTGATCTTTGTGTTCTAGGTCTTGATTCGCTTGACGCTGCTG	5855.76	4903.61
NCPT_N1560	GAATATAATATGGTTCACGTGCGCTTCATCTTTTAGGTCTTGATTCGCTTGACGCTGCTG	22424.8	17005
NCPT_N1585	CTAATCGGAAAATATCACGTTGTACGTAACAATTTCGTCTTGATTCGCTTGACGCTGCTG	3625.81	7771.89
NCPT_N1616	GAACCTACAGACCACAACGTGTCACTGCTAAGCTAGGTCTTGATTCGCTTGACGCTGCTG	97.3827	6382.06
NCPT_N1626	GAAGTACGTTTTAACAACGTGAAGCACAACTGTTAGGTCTTGATTCGCTTGACGCTGCTG	197.142	4289.98
NCPT_N1667	GAATTAAAACGGTATCACGTTTAAATATGTGACTAGGTCTTGATTCGCTTGACGCTGCTG	3231	4252.63
NCPT_N1681	CTATGGTATATGCTGCACGTGTAGTCTAATGTTTTCGTCTTGATTCGCTTGACGCTGCTG	27750.8	28946.3
NCPT_N170	GAATCCAAATCTGATCACGTTAGGAAATATACATAGGTCTTGATTCGCTTGACGCTGCTG	7790.18	2168.96
NCPT_N1703	GAAGCACTTTTTATGCACGTGCATCGTACAATTTAGGTCTTGATTCGCTTGACGCTGCTG	31480.5	31423.4
NCPT_N1705	GAACGGATGCTATGTCACGTTGAATTAGACCGTTAGGTCTTGATTCGCTTGACGCTGCTG	2018.99	3450.3
NCPT_N1774	CTAAGAGAAGACCCCCACGTGCCCTAAAAATAATTCGTCTTGATTCGCTTGACGCTGCTG	21627.1	24297.9
NCPT_N1824	GAAGCAAAAAGATTTCACGTTGTTCGGGAGGTATAGGTCTTGATTCGCTTGACGCTGCTG	188.25	3316.45
NCPT_N1828	GAAATTCAAATATATCACGTTGTGAGCAGCCCTTAGGTCTTGATTCGCTTGACGCTGCTG	3454.48	5569.15
NCPT_N1855	CTACGGAAAAACCTCCACGTGTTAGGTTATTCCTTCGTCTTGATTCGCTTGACGCTGCTG	16704.5	19985.3
NCPT_N1871	GAAGTTCACCGTTTTCACGTGCACAAATTCGAGTAGGTCTTGATTCGCTTGACGCTGCTG	29799.1	11710.9
NCPT_N1881	CTAAGTTAGAACGATCACGTTGACTCTGAAATATTCGTCTTGATTCGCTTGACGCTGCTG	4390.32	4916.22
NCPT_N1907	GAATAATAAAACATAAACGTGATGCTTTTACCATAGGTCTTGATTCGCTTGACGCTGCTG	4181.01	6727.21
NCPT_N192	GAACGCTGGGTAATGGACGTGTCACTCTACTTCTAGGTCTTGATTCGCTTGACGCTGCTG	53.5972	2091.38
NCPT_N1944	CTATGTATACCACTTCACGTGCCACCGAGTAGGTTCGTCTTGATTCGCTTGACGCTGCTG	19257.2	11266
NCPT_N1962	CTAAGTTTTTAGAACCTCGTGGTGAGGAGTGTTTTCGTCTTGATTCGCTTGACGCTGCTG	206.232	6340.59
NCPT_N1985	CTATTCCATAACACAAACGTGACGTGCAAATAATTCGTCTTGATTCGCTTGACGCTGCTG	9550.67	6886.78
NCPT_N2007	GAACTTACCCCTCTACACGTGGCTTCTCAGAAGTAGGTCTTGATTCGCTTGACGCTGCTG	7487.85	16036.2
NCPT_N2089	GAAAACGTGCACCAACACGTGTGCGGCAACCTGTAGGTCTTGATTCGCTTGACGCTGCTG	12557.3	23127.6
NCPT_N2094	GAACTTGGAATGTGTCACGTTGGGCATTTTTAATAGGTCTTGATTCGCTTGACGCTGCTG	7105.98	6525.88
NCPT_N2155	CTAAATCGCATACTCCACGTGAGAACAAGAAAATTCGTCTTGATTCGCTTGACGCTGCTG	7159.38	11565.7
NCPT_N2207	CTACCACTCTTTCTCCACGTGGCTTTGCTTTCCTTCGTCTTGATTCGCTTGACGCTGCTG	5198.93	25207.2
NCPT_N2215	CTAGCATAATATTAATACGTGTCACTCTCACTATTCGTCTTGATTCGCTTGACGCTGCTG	115.086	2369.05
NCPT_N2249	CTATTGTGTGAGTTCCACGTGCGGATGACTTAATTCGTCTTGATTCGCTTGACGCTGCTG	7842.47	24604.5
NCPT_N2290	CTATCCTTAGTTAAGCACGTGCCGATGATATCATTCGTCTTGATTCGCTTGACGCTGCTG	29818.8	25607.3
NCPT_N2311	GAAACCATCACTTATCACGTTGTGGTGACAACGTAGGTCTTGATTCGCTTGACGCTGCTG	1878.37	5603.71
NCPT_N2317	GAACTTGTTGCTAGGAACGTGATGATGGATTTCTAGGTCTTGATTCGCTTGACGCTGCTG	1092.07	5813.44
NCPT_N2351	CTATGCGACGGTATCCACGTGCAGAACAACATATTCGTCTTGATTCGCTTGACGCTGCTG	6815.59	23268.5
NCPT_N2445	CTAAGTTCATCATTTCACGTGTGCAGCATAGTGTTCGTCTTGATTCGCTTGACGCTGCTG	9886.11	8361.39
NCPT_N2461	GAACGCTAAGATTTTCACGTGCTCATCAATGTGTAGGTCTTGATTCGCTTGACGCTGCTG	21652.5	14141.2
NCPT_N248	CTAGCAAAAAGATTTCACGTTGTTCGGGAGGTATTCGTCTTGATTCGCTTGACGCTGCTG	117.102	2920.8
NCPT_N2528	GAAACAAGGCTTTTAAACGTGATTGTGTTGTATTAGGTCTTGATTCGCTTGACGCTGCTG	557.356	3869.99
NCPT_N2541	GAAAGGCAATCGAAACACGTGGAAAAGTACTCTTAGGTCTTGATTCGCTTGACGCTGCTG	14920	27817.7
NCPT_N2596	CTATACCCAACATGTCACGTTTCACGAATTCTCTTCGTCTTGATTCGCTTGACGCTGCTG	18325.9	6902.94
NCPT_N2642	CTAAAGACTGACAGTCACGTTGAGTCCTATTATTTCGTCTTGATTCGCTTGACGCTGCTG	4736.07	4585.03
NCPT_N2694	GAAAATTTATTAGCTCACGTGTATACATGTATATAGGTCTTGATTCGCTTGACGCTGCTG	32664.8	12835.2
NCPT_N276	CTATTGCTTGAGCCACACGTGTATATAAAAATGTTCGTCTTGATTCGCTTGACGCTGCTG	11518.3	21145.2
NCPT_N2762	CTACGTTTCTGCCGTCACGTTTCCTATTATCACTTCGTCTTGATTCGCTTGACGCTGCTG	7868.7	6365.92
NCPT_N2763	GAAGCACCCCCAATCCACGTGTGTTTTATACGCTAGGTCTTGATTCGCTTGACGCTGCTG	5899.17	17864.4
NCPT_N2785	GAACGATAGCTAAATCACGTTTAACGAAGATTTTAGGTCTTGATTCGCTTGACGCTGCTG	2047.6	3975.5
NCPT_N2794	GAAAGGAGGGACCTCCACGTGCCAAACGACACTTAGGTCTTGATTCGCTTGACGCTGCTG	7938.11	16427
NCPT_N2840	GAAACCAGTGGCACACACGTGAACTACATCACTTAGGTCTTGATTCGCTTGACGCTGCTG	9311.31	9603.29
NCPT_N2889	CTACCAGGTTTTGACAACGTGATGAGGTAATCTTTCGTCTTGATTCGCTTGACGCTGCTG	11084.1	6603.82
NCPT_N296	GAAACATTTTCACATCACGTTTCTTTTTTTTCTTAGGTCTTGATTCGCTTGACGCTGCTG	19571.8	8828.69
NCPT_N3117	CTATTTTTTTAGCGTCACGTTAATCAGCCCAATTTCGTCTTGATTCGCTTGACGCTGCTG	4160.81	2002.22
NCPT_N3129	CTACTCCGCTTTATTCACGTGAAATGGGGTCGATTCGTCTTGATTCGCTTGACGCTGCTG	7855.97	4638.68
NCPT_N3144	GAAAAACGAGCCACTCACGTGAAAACATATAGATAGGTCTTGATTCGCTTGACGCTGCTG	13932.1	6661.27
NCPT_N3154	GAACAAGCCTCGCTTCACGTGTAACATACACAGTAGGTCTTGATTCGCTTGACGCTGCTG	6865.86	7388.8
NCPT_N3157	CTATGTTATTGTCCTCACGTGAATTGAATTGAATTCGTCTTGATTCGCTTGACGCTGCTG	31974.5	7663.27
NCPT_N3194	GAAATAATGTGTGAAAACGTGATGCTTTCTCGATAGGTCTTGATTCGCTTGACGCTGCTG	6037.76	8112.77
NCPT_N3223	CTAAAATAGACAATCAACGTGATGGGGTTTAAATTCGTCTTGATTCGCTTGACGCTGCTG	2240.15	5514.67
NCPT_N3253	CTATTCGCGGCGTTACACGTGAGTTCATATTATTTCGTCTTGATTCGCTTGACGCTGCTG	13452.8	11884.3
NCPT_N3268	CTAAAACGAAGAAAGCACGTGAGGATTGAAGAATTCGTCTTGATTCGCTTGACGCTGCTG	35229.6	13995.8
NCPT_N3309	CTAGTCACTTTTCATCACGTGTGTATTTAAGTATTCGTCTTGATTCGCTTGACGCTGCTG	41067	17115.3
NCPT_N3320	CTACTATGACCTGTTCACGTGGCCAAATGTTCTTTCGTCTTGATTCGCTTGACGCTGCTG	23453.9	11504.6
NCPT_N3336	GAATCTTCCAAAAATCACGTTGATGCCACCAGGTAGGTCTTGATTCGCTTGACGCTGCTG	1371.66	3718.26
NCPT_N3347	CTAATATCTGACACGCACGTGATGACCACGTAATTCGTCTTGATTCGCTTGACGCTGCTG	34739	21339.3
NCPT_N3377	GAATATTCACTTTTGAACGTGACGGTAATTTTGTAGGTCTTGATTCGCTTGACGCTGCTG	2469.85	4835.94
NCPT_N3432	GAAAAAGTTTCAAGTCACGTTCATTTTCACACCTAGGTCTTGATTCGCTTGACGCTGCTG	10969.2	4545.07
NCPT_N3455	GAATGTGTCTGCAGCCACGTGCAAAGTACGGTCTAGGTCTTGATTCGCTTGACGCTGCTG	11634.5	18397.7
NCPT_N3470	CTATGGTATTCTGACAACGTGTTGTCATACCTGTTCGTCTTGATTCGCTTGACGCTGCTG	208.973	8619.27
NCPT_N3480	CTAGAATTTGAATAGAACGTGACTCAACAGAAATTCGTCTTGATTCGCTTGACGCTGCTG	7806.68	7079.37
NCPT_N3516	GAATCCATTTCAGCTAACGTGATACAACAGGTCTAGGTCTTGATTCGCTTGACGCTGCTG	1407.65	1994.31
NCPT_N3555	GAATGTAATTATCAACACGTGCATTACCCAGCGTAGGTCTTGATTCGCTTGACGCTGCTG	17396.8	19605.4
NCPT_N3571	GAATATCATATTTTCCACGTGAGGGAGCTCAAATAGGTCTTGATTCGCTTGACGCTGCTG	9466.54	10971.4
NCPT_N3616	CTAACCCTCATAAAGCACGTGGCCTCTTATCGATTCGTCTTGATTCGCTTGACGCTGCTG	21412.1	20679
NCPT_N366	CTAAAAAAGTATAATCACGTTAATCAAGGCTGCTTCGTCTTGATTCGCTTGACGCTGCTG	461.365	1805.59
NCPT_N3698	GAATTTCAGGCTTTGAACGTGATTTTCCCAAACTAGGTCTTGATTCGCTTGACGCTGCTG	275.78	2964.68
NCPT_N375	GAAACTTTTTTCCCACACGTGCTTATGGGCCGCTAGGTCTTGATTCGCTTGACGCTGCTG	11934.1	22661.6
NCPT_N3764	GAAAAAGGTAGTATTCACGTGTGGCTTCAAGAATAGGTCTTGATTCGCTTGACGCTGCTG	5495.81	9517.21
NCPT_N3884	CTACATTGCTAGTGTCACGTTCAGAAAACGAGATTCGTCTTGATTCGCTTGACGCTGCTG	1507.48	4568.42
NCPT_N3898	GAAAATCGAAGTGCCCACGTGCTGCTCATTCTCTAGGTCTTGATTCGCTTGACGCTGCTG	34385.8	38451.6
NCPT_N3901	CTACCTTTTGATTATCACGTTGAGTGTCGAAGATTCGTCTTGATTCGCTTGACGCTGCTG	789.924	4246.48
NCPT_N3925	GAAAAAAAGTTTAATCACGTTCCCGCTTCTTTTTAGGTCTTGATTCGCTTGACGCTGCTG	5617.87	7409.77
NCPT_N3963	GAACTTCTCCATTTTCACGTGCTAAAAAAGTTCTAGGTCTTGATTCGCTTGACGCTGCTG	28531.1	14578.4
NCPT_N3970	GAAACGTTTCTTTTTCACGTGCTAAGTGATCTATAGGTCTTGATTCGCTTGACGCTGCTG	29738.5	13939.4
NCPT_N3986	CTATGACTCTTCTACAACGTGAATGCCTTTGATTTCGTCTTGATTCGCTTGACGCTGCTG	123.572	3653.39
NCPT_N40	CTAATTGTACGTATTCACGTGTGAATTGCTAAATTCGTCTTGATTCGCTTGACGCTGCTG	15840.5	7544.76
NCPT_N4015	GAAGAAAAAAACATACACGTGTGTTTTTAGACTTAGGTCTTGATTCGCTTGACGCTGCTG	9585.32	17882.2
NCPT_N408	GAACTTCTTAGACCGCACGTGATGATATTGAGATAGGTCTTGATTCGCTTGACGCTGCTG	32564.5	22514.7
NCPT_N4093	CTATACAGAGCAAGGAACGTGATGTAATGCATTTTCGTCTTGATTCGCTTGACGCTGCTG	1529.03	7148.16
NCPT_N4123	GAATTTTTGATAATTCACGTGTAATTAAGAACATAGGTCTTGATTCGCTTGACGCTGCTG	7700.73	10834.9
NCPT_N4149	CTAAGTTCTTCAGCAAACGTGATTTGCAAAACATTCGTCTTGATTCGCTTGACGCTGCTG	3541.86	3661.29
NCPT_N4174	GAACCAAAAAGTCAGCACGTGATCTGCTAAGAATAGGTCTTGATTCGCTTGACGCTGCTG	76098.4	21715.9
NCPT_N4181	CTAGTTGTGATCCGTCACGTGTATGCAAAACGCTTCGTCTTGATTCGCTTGACGCTGCTG	40400.8	16887.1
NCPT_N4214	CTAACAAACGGGGCACACGTGCGGGAGTTTCAATTCGTCTTGATTCGCTTGACGCTGCTG	18614	20923.8
NCPT_N4295	GAAAAACATCTGCAGCACGTGCTTGTTATGCTTTAGGTCTTGATTCGCTTGACGCTGCTG	37100.4	26523.3
NCPT_N4313	GAAGCGGTAATTCAACACGTGAATTTCAGCTATTAGGTCTTGATTCGCTTGACGCTGCTG	19648.8	8564.29
NCPT_N4332	CTATTGGAATGATATCACGTTCGAAGTCTCTGTTTCGTCTTGATTCGCTTGACGCTGCTG	604.74	4017.65
NCPT_N4333	CTACAAAGCTGTCTCCACGTGGAAAGTTTATTTTTCGTCTTGATTCGCTTGACGCTGCTG	12883.6	26244.4
NCPT_N4421	CTATATTAACCTCACAACGTGATAGAAACCTTGTTCGTCTTGATTCGCTTGACGCTGCTG	1713.1	6161.46
NCPT_N4459	CTAAGTTGCCAAGCCAACGTGATGTCACAGGTCTTCGTCTTGATTCGCTTGACGCTGCTG	828.296	4050.87
NCPT_N453	CTAAATCTCTAAGTACACGTGCATTTGGACCTATTCGTCTTGATTCGCTTGACGCTGCTG	12576.9	18266.9
NCPT_N455	CTATATGCTAAAATTCACGTGTACGCATTTCAATTCGTCTTGATTCGCTTGACGCTGCTG	19618.7	9607.84
NCPT_N4557	GAAAATACTGAGTGTCACGTTAATAATACGGATTAGGTCTTGATTCGCTTGACGCTGCTG	2035.1	2497.67
NCPT_N458	CTATAGTAGGAATATCACGTTTAACGATGCCCCTTCGTCTTGATTCGCTTGACGCTGCTG	637.416	4466.66
NCPT_N4631	GAATGAATTGTGTTGCACGTGACTAAACATTGTTAGGTCTTGATTCGCTTGACGCTGCTG	76624.3	24782.8
NCPT_N4640	CTAATAAAGGGAACACACGTGAAAGTGAAGGACTTCGTCTTGATTCGCTTGACGCTGCTG	10050.8	8977.74
NCPT_N4642	GAAAAGCCTTTTCTCAACGTGACTGGAGTAACGTAGGTCTTGATTCGCTTGACGCTGCTG	5680.49	3830.14
NCPT_N4695	CTACACAAATATTTACACGTGAGAGAAAGGAAGTTCGTCTTGATTCGCTTGACGCTGCTG	20116.9	9220.38
NCPT_N4713	CTACAGTATTTTTTTCACGTGCTTTTTTTTCAATTCGTCTTGATTCGCTTGACGCTGCTG	19266.3	15620.6
NCPT_N4757	CTATTATAATGAAACCACGTGAGCACGATGAAATTCGTCTTGATTCGCTTGACGCTGCTG	43415.3	15371
NCPT_N4819	CTAACACTTCAACAACACGTGTCTGTGACCGCTTTCGTCTTGATTCGCTTGACGCTGCTG	15767.4	18968.7
NCPT_N4856	GAACAACTGGCTGAACACGTGCCCCTCTATCTGTAGGTCTTGATTCGCTTGACGCTGCTG	30378.3	29211.2
NCPT_N4907	CTATGGGTATACAATCACGTGTACTATCAAATATTCGTCTTGATTCGCTTGACGCTGCTG	39708.4	17387.4
NCPT_N4917	CTAGCCAAGAAAGAGCACGTGTAAAAATGGAATTTCGTCTTGATTCGCTTGACGCTGCTG	23228.4	24698.9
NCPT_N4918	CTATTTTGCGGGCATCACGTTCGTCGTGACATATTCGTCTTGATTCGCTTGACGCTGCTG	746.923	5226.3
NCPT_N4928	CTAATCACAAAATGTCACGTGCATGTTAGTCCATTCGTCTTGATTCGCTTGACGCTGCTG	48440.8	19324
NCPT_N4937	GAAGATTGCTCGAATCACGTTTTTCTTGTTTTTTAGGTCTTGATTCGCTTGACGCTGCTG	10354	6519.55
NCPT_N494	GAAATACCTTCGTAAAACGTGACGACTTTCATATAGGTCTTGATTCGCTTGACGCTGCTG	11286.6	7731.53
NCPT_N4961	GAACTAGTTTATTATCACGTGCGGTGTAAGAAGTAGGTCTTGATTCGCTTGACGCTGCTG	34007.3	14239.4
NCPT_N4997	GAAAAGTTTAGCATTCACGTGTAACTGCAATGATAGGTCTTGATTCGCTTGACGCTGCTG	9975.83	10534.7
NCPT_N4998	CTATTTTTCACCTTCCACGTGGATATTTTCACGTTCGTCTTGATTCGCTTGACGCTGCTG	8971.44	19377.7
NCPT_N5004	CTAACTAGGTATTTACACGTGAAAGTATTGAATTTCGTCTTGATTCGCTTGACGCTGCTG	13996.7	8563.3
NCPT_N5058	CTAAAATAACATACACACGTGTAAGAATATATATTCGTCTTGATTCGCTTGACGCTGCTG	18504.7	17369.2
NCPT_N506	CTATCTCGAAGTGGTCACGTGCGGGTCTAGGCCTTCGTCTTGATTCGCTTGACGCTGCTG	42784.9	17937.4
NCPT_N5065	CTACACATAGAAAGACACGTGGAAATAACAGTCTTCGTCTTGATTCGCTTGACGCTGCTG	11798.7	20688.5
NCPT_N5076	GAAAGAAATGTGCCCAACGTGACCATGGCTCTTTAGGTCTTGATTCGCTTGACGCTGCTG	13101	4330.09
NCPT_N5121	GAAAGTTGACGAATCAACGTGATAATTGTGTAATAGGTCTTGATTCGCTTGACGCTGCTG	886.337	4073.38
NCPT_N5194	GAATTCATATAAGATCACGTTGTTTATATGAATTAGGTCTTGATTCGCTTGACGCTGCTG	21867.7	7599.66
NCPT_N5227	GAACAAACTTATGCCAACGTGACCATTTATTATTAGGTCTTGATTCGCTTGACGCTGCTG	16054.7	6515.81
NCPT_N5229	CTATAGCCCTCTAAACACGTGGAGAGTAACCTTTTCGTCTTGATTCGCTTGACGCTGCTG	14406.5	23949.1
NCPT_N5243	GAATCTTGTAGTTGCCACGTGAAACCTGACAACTAGGTCTTGATTCGCTTGACGCTGCTG	12377	11788.1
NCPT_N5255	GAATAAATCCTGAGGAACGTGACACATAAAGTTTAGGTCTTGATTCGCTTGACGCTGCTG	13802.6	8307.39
NCPT_N5263	CTATTAAACACTAACCACGTGCAACCAACAGAATTCGTCTTGATTCGCTTGACGCTGCTG	21434.7	20940.8
NCPT_N5374	GAACTACTATTTAAGCACGTGCATAAATTGGGTTAGGTCTTGATTCGCTTGACGCTGCTG	42101.5	25082
NCPT_N543	CTAATCCATAAAAGAAACGTGATGGTCGTTCCCTTCGTCTTGATTCGCTTGACGCTGCTG	1424.53	5612.1
NCPT_N5464	GAAATTTTCCAGCCACACGTGAAGTAAGCTGCATAGGTCTTGATTCGCTTGACGCTGCTG	8945.12	10410.7
NCPT_N5488	GAAATGGAATTACCTCACGTTGTTCACATTAGTTAGGTCTTGATTCGCTTGACGCTGCTG	329.482	4503.27
NCPT_N5489	CTAACACACCGCGCACACGTGCTTTATTTCTTTTTCGTCTTGATTCGCTTGACGCTGCTG	27273.1	26383
NCPT_N5494	CTAATCAATTGAGATCACGTGCAAACCGAAGAATTCGTCTTGATTCGCTTGACGCTGCTG	52949.1	14156.4
NCPT_N5643	CTATTCAAGCAAGTACACGTGCGCAAGTTGTACTTCGTCTTGATTCGCTTGACGCTGCTG	17970.1	20840.3
NCPT_N5655	GAAGATGGGTCTTGCAACGTGATCTAGTAGATATAGGTCTTGATTCGCTTGACGCTGCTG	5195.6	5401.92
NCPT_N5666	GAACCCTTCGTGAAACACGTGGGATACCGGTTATAGGTCTTGATTCGCTTGACGCTGCTG	10287.3	18634.7
NCPT_N5725	GAATCATATCTTTCCCACGTGGCCTTAACTACGTAGGTCTTGATTCGCTTGACGCTGCTG	11195.9	27072.5
NCPT_N5733	CTAACACATGCGCTGCACGTGCGGCCGGAACAATTCGTCTTGATTCGCTTGACGCTGCTG	18338.5	22550.7
NCPT_N5756	GAAACGGTACGTATCCACGTGGAGAAGCACATTTAGGTCTTGATTCGCTTGACGCTGCTG	4933.9	21422.1
NCPT_N5760	CTACTGCCACCATACCACGTGTGTCCCTCGCAATTCGTCTTGATTCGCTTGACGCTGCTG	9820.96	19616.9
NCPT_N5764	GAAACCGTCGCTGTGCACGTGACACTCACTTCATAGGTCTTGATTCGCTTGACGCTGCTG	39124	20859.1
NCPT_N5780	GAAGTGGATTACGCTCACGTGCTTTCCGCGGAATAGGTCTTGATTCGCTTGACGCTGCTG	35812.6	17728.2
NCPT_N58	CTACTGTGCTAGTCCCACGTGTGAGTGCCAAGGTTCGTCTTGATTCGCTTGACGCTGCTG	3444.2	18363.7
NCPT_N5827	GAAAACTGAGTTCCAAACGTGACAAGGTAAGTTTAGGTCTTGATTCGCTTGACGCTGCTG	1450.26	3305.8
NCPT_N5831	CTATTGCTGAATAGTCACGTTGATGAGCACGAATTCGTCTTGATTCGCTTGACGCTGCTG	5775.71	5244.25
NCPT_N5892	GAAGGATGTGCATATCACGTTCGGATCTATGTATAGGTCTTGATTCGCTTGACGCTGCTG	333.851	4078.88
NCPT_N5901	GAAATATCACAACGTCACGTTGAATAAGGCCATTAGGTCTTGATTCGCTTGACGCTGCTG	923.632	4209.47
NCPT_N5958	GAAATTTGAAGTCATCACGTTTGCCCACATCAATAGGTCTTGATTCGCTTGACGCTGCTG	857.473	4105.59
NCPT_N5979	GAATTCCATTATCATCACGTGTAGCGTTTCTGCTAGGTCTTGATTCGCTTGACGCTGCTG	47632.4	15092.5
NCPT_N6066	CTATTAAAAAAAAATCACGTGGTGCAAAAAAAATTCGTCTTGATTCGCTTGACGCTGCTG	74303.3	26024.7
NCPT_N6075	GAAAGTAACCTCAGGAACGTGACAACTACTTTTTAGGTCTTGATTCGCTTGACGCTGCTG	3733.37	7386.11
NCPT_N6090	GAAACAGGGAAAGTACACGTGAAATTTTAAACTTAGGTCTTGATTCGCTTGACGCTGCTG	15491.8	8547.98
NCPT_N6159	CTAATACTAGTTCTCCTCGTGGTATAGGAATCCTTCGTCTTGATTCGCTTGACGCTGCTG	166.896	5735.27
NCPT_N6180	GAAGATAATAATAATCACGTTTATATCACGTGATAGGTCTTGATTCGCTTGACGCTGCTG	48109.3	12452.6
NCPT_N6213	GAAAAGAGCTACGAGCACGTGCAAATATATGAATAGGTCTTGATTCGCTTGACGCTGCTG	43309.8	24381.3
NCPT_N6249	GAAGACTAGAATGGGCACGTGATCATAAAATTATAGGTCTTGATTCGCTTGACGCTGCTG	70909.3	22113
NCPT_N6298	CTAAGCCGGTGTAGCCACGTGTTAAATCTTGACTTCGTCTTGATTCGCTTGACGCTGCTG	19744.2	23544.2
NCPT_N6325	GAAATGAGTCAAAACCACGTGTAATTAATAAAGTAGGTCTTGATTCGCTTGACGCTGCTG	19671.5	17871.3
NCPT_N6405	CTAAGAAGAAACACGCACGTGTACCCAAAAATATTCGTCTTGATTCGCTTGACGCTGCTG	21750.4	23632.2
NCPT_N6540	GAAATTAATTATAATCACGTTGTTCCTTCCCAATAGGTCTTGATTCGCTTGACGCTGCTG	8943.47	6502.8
NCPT_N6543	CTACCGGCTTTCTCCCACGAGGTTTCACTGCTGTTCGTCTTGATTCGCTTGACGCTGCTG	102.464	6672.33
NCPT_N6548	CTAATAACTCAACAAAACGTGACAAAAAATCACTTCGTCTTGATTCGCTTGACGCTGCTG	10657.6	8249.84
NCPT_N6569	GAAGTTCGAAAATAGCACGTGCCTATTGATCTTTAGGTCTTGATTCGCTTGACGCTGCTG	39300.7	22210.7
NCPT_N6631	CTATATCGAGTCTCCCACGAGGTTGACAAATAATTCGTCTTGATTCGCTTGACGCTGCTG	209.639	12218.5
NCPT_N664	GAAAGCATAAACTATCACGTTGAAGATAGCATATAGGTCTTGATTCGCTTGACGCTGCTG	798.542	3887.17
NCPT_N6715	CTATGTTGTTATATTCACGTGCCTGTTTGCTTTTTCGTCTTGATTCGCTTGACGCTGCTG	21892.4	18229.3
NCPT_N6732	CTAAATATACTTGTTAACGTGATTAAACGTTTTTTCGTCTTGATTCGCTTGACGCTGCTG	3589.08	2958.86
NCPT_N6745	CTAATGTAGTATACACACGTGGACGACCATTAATTCGTCTTGATTCGCTTGACGCTGCTG	17442.8	25053.1
NCPT_N6764	GAAATGCTTTATTGACACGTGAGAAGGGAAACTTAGGTCTTGATTCGCTTGACGCTGCTG	24461.7	10542.7
NCPT_N6770	GAACGCGTTCCGTGACACGTTAAAGGATAATAGTAGGTCTTGATTCGCTTGACGCTGCTG	706.569	3589.24
NCPT_N6794	CTACAGAGCAAATATCACGTGCACAAAGAACTATTCGTCTTGATTCGCTTGACGCTGCTG	42942.5	16547.7
NCPT_N6848	CTATAGTCATATTACCACGTGGAGCATCATGAATTCGTCTTGATTCGCTTGACGCTGCTG	12464.5	26716.4
NCPT_N6887	GAATGCCTTGACATACACGTGTCTATTTCTTTTTAGGTCTTGATTCGCTTGACGCTGCTG	24324.1	23756.5
NCPT_N6908	CTATTGGTCTGAAAACACGTGTAGTACTTTCTCTTCGTCTTGATTCGCTTGACGCTGCTG	18002.6	21247.8
NCPT_N7059	CTAAAAAAGAAAATACACGTGCTGTTAATATACTTCGTCTTGATTCGCTTGACGCTGCTG	30306.5	22040.4
NCPT_N7074	CTATTCCCAGCTTTTCACGTGCGAGGTGGACTATTCGTCTTGATTCGCTTGACGCTGCTG	11329.9	9921.08
NCPT_N709	GAAATGCAATTCAGTCACGTTCCACACAGTTTGTAGGTCTTGATTCGCTTGACGCTGCTG	12296.9	8603.54
NCPT_N7141	GAAATACCGCCTTCTCACGTGGTACAGGCACAATAGGTCTTGATTCGCTTGACGCTGCTG	24942.1	13549.8
NCPT_N7149	GAATGACTCAAGTGTCACGTGCATCAGTTTTTCTAGGTCTTGATTCGCTTGACGCTGCTG	34549.6	18750.6
NCPT_N7178	GAACTCTCCCCCCCACACGTGATAGCCTTTCTTTAGGTCTTGATTCGCTTGACGCTGCTG	34765	14861.1
NCPT_N7179	CTAACTCAGGTCCAGAACGTGACACATCTTTGCTTCGTCTTGATTCGCTTGACGCTGCTG	6934.99	4885.1
NCPT_N7189	CTAATAATGCTATCACACGTGCATAATAAAATATTCGTCTTGATTCGCTTGACGCTGCTG	29533.9	26941.5
NCPT_N724	GAATAGTTGCGGTAGAACGTGATGTTGATATAGTAGGTCTTGATTCGCTTGACGCTGCTG	2061.48	6598.69
NCPT_N725	CTATACAAGAAATATCACGTTGGCGCGCGCTAATTCGTCTTGATTCGCTTGACGCTGCTG	1025.97	5637
NCPT_N732	CTATCCACCTGCGAACACGTGGAAGTCGCAATTTTCGTCTTGATTCGCTTGACGCTGCTG	13304	21651.4
NCPT_N7355	GAACTGATCACTCCGCACGTGCGCGCTGAGAGGTAGGTCTTGATTCGCTTGACGCTGCTG	16496.7	29870.7
NCPT_N7381	CTACCTCTTTTTTTTCACGTGCTGCGCTGATGTTTCGTCTTGATTCGCTTGACGCTGCTG	18389.6	13802.7
NCPT_N7399	CTAGAACACTACGCCAACGTGATTGGCAATTGTTTCGTCTTGATTCGCTTGACGCTGCTG	4096.39	5415.29
NCPT_N7425	CTAAGTAGAATACTACACGTGCAATCGGTAGCATTCGTCTTGATTCGCTTGACGCTGCTG	13319.2	13658.3
NCPT_N7444	GAAATTTTTTATGAGCACGTGTTATTTATTCCTTAGGTCTTGATTCGCTTGACGCTGCTG	53268.1	22965
NCPT_N75	GAAAAAAGGCAATATCACGTGCTTTTACAAATATAGGTCTTGATTCGCTTGACGCTGCTG	56896.3	23753.3
NCPT_N7507	CTAATCCTTTTTTAGCACGTGAACGGTAATAACTTCGTCTTGATTCGCTTGACGCTGCTG	21542.7	16383.8
NCPT_N783	CTAACGAATGAAAAGCACGTGAACTAACAAACTTTCGTCTTGATTCGCTTGACGCTGCTG	16936.9	13213.4
NCPT_N784	CTAAGTTTTGAATAACACGTGCCTTTGATTTTTTTCGTCTTGATTCGCTTGACGCTGCTG	22489.7	23302
NCPT_N794	GAATTGATGATTTCGCACGTGGGAAAAGTAATCTAGGTCTTGATTCGCTTGACGCTGCTG	13305.3	23458
NCPT_N826	CTACTCATATATGGTCACGTGGCTCGATGTTTATTCGTCTTGATTCGCTTGACGCTGCTG	72343.3	20996.1
NCPT_N833	CTAAAAAGAGAAAAACACGTGTGGAGAACTTTTTTCGTCTTGATTCGCTTGACGCTGCTG	16396.2	17896
NCPT_N864	CTACTTAATGGAACAAACGTGATCTGGGATAAATTCGTCTTGATTCGCTTGACGCTGCTG	11026.6	4965.9
NCPT_N893	CTAAAAGAAAAATTAAACGTGATCGGTCTATCGTTCGTCTTGATTCGCTTGACGCTGCTG	6010.08	4710.51
NCPT_N905	CTAATGACACTATTAAACGTGACGGTGCTGCTGTTCGTCTTGATTCGCTTGACGCTGCTG	1035.83	4498.42
NCPT_N96	CTATCTGGAAAATTCCACGAGGTCCGTATATGATTCGTCTTGATTCGCTTGACGCTGCTG	108.037	4842.1
NCPT_N989	CTAAGTGTTTCAACAAACGTGATGTTGTATATGTTCGTCTTGATTCGCTTGACGCTGCTG	2124.36	4890.3
NCPT_N995	CTAACGTTGCTCTTGCACGTGTATTTCGCTGCTTTCGTCTTGATTCGCTTGACGCTGCTG	8445.34	15778
NCP_D1009	GAACTTGATGGTCTACACGTTGTTTCAAGTGCATAGGTCTTGATTCGCTTGACGCTGCTG	108.146	6660.5
NCP_D1076	GAAGTACATGTGAAGCATGTGGTAACAGATGGATAGGTCTTGATTCGCTTGACGCTGCTG	407.057	6802.04
NCP_D1134	GAATCAAGTAGGTCCCTCGTGTCACATACGAGTTAGGTCTTGATTCGCTTGACGCTGCTG	155.297	5731.51
NCP_D1298	CTACGAAATTGAGTGCACATGCTCGCAAGATAATTCGTCTTGATTCGCTTGACGCTGCTG	1458.3	7371.26
NCP_D1394	CTATCTTCATCTATGCATGTGCCTCTCCCAACGTTCGTCTTGATTCGCTTGACGCTGCTG	191.029	5219.3
NCP_D1475	CTAATGACGACCTCGCACGAGGCTTATCATTGCTTCGTCTTGATTCGCTTGACGCTGCTG	154.122	4968.39
NCP_D1538	CTATTAATAGTGATACATGTGCTCAATTACGGTTTCGTCTTGATTCGCTTGACGCTGCTG	1559.69	5990.28
NCP_D1567	GAAGTTCAACCCGGACACGTTGTTATTAGCTGGTAGGTCTTGATTCGCTTGACGCTGCTG	158.271	9678.47
NCP_D1578	CTATCAGGAAGAGGCCACATGCATTACAGAGAATTCGTCTTGATTCGCTTGACGCTGCTG	159.395	4197.81
NCP_D1778	GAAGAAGAAAAAGAACACGTTGAAAACGAACATTAGGTCTTGATTCGCTTGACGCTGCTG	152.47	6523.09
NCP_D1884	CTACAGCCAATCAAACACGAGGAATGTGGGATGTTCGTCTTGATTCGCTTGACGCTGCTG	120.864	5795.28
NCP_D193	CTAACATATACTATGCACGTTTTTTATATGACGTTCGTCTTGATTCGCTTGACGCTGCTG	581.181	11828.4
NCP_D1973	CTACTGCGGCTCCGCCTCGTGCTGCTCAAGGGCTTCGTCTTGATTCGCTTGACGCTGCTG	86.6234	4723.81
NCP_D1982	CTAGTTTCCATTTGCCACGTTGCTTTGCCTTCTTTCGTCTTGATTCGCTTGACGCTGCTG	174.269	9579.63
NCP_D2200	GAAGCATCATGCGGGAACGTGCAGTAAAGCTCATAGGTCTTGATTCGCTTGACGCTGCTG	99.1579	10915.8
NCP_D2219	GAATTAACTTTATTGCACGTTATTGCTTCCACATAGGTCTTGATTCGCTTGACGCTGCTG	274.765	4655.14
NCP_D2235	GAAGAACCTTTACTACATGTGCTGACAACCAAATAGGTCTTGATTCGCTTGACGCTGCTG	202.816	4857.96
NCP_D2263	GAATCTCGGTTGAGCAACGTGAAAAACCTTCCATAGGTCTTGATTCGCTTGACGCTGCTG	57.9943	2978.84
NCP_D2376	GAATTCTATTGAAGCAACGTGCAAGATGATCACTAGGTCTTGATTCGCTTGACGCTGCTG	435.894	8814.81
NCP_D2378	CTAGTTGTCGTACCCCATGTGCCCTATTCTTTGTTCGTCTTGATTCGCTTGACGCTGCTG	242.169	8202.52
NCP_D2395	GAAATAAGATAATTGCACATGCAAACAGTCAATTAGGTCTTGATTCGCTTGACGCTGCTG	148.93	4080.36
NCP_D2477	CTACATACACGAACCCGCGTGCGCCTGGTAAATTTCGTCTTGATTCGCTTGACGCTGCTG	101.081	6763.41
NCP_D2505	GAATAGAACCAGCCGCACATGGCCGGAGAAACTTAGGTCTTGATTCGCTTGACGCTGCTG	154.41	4885.45
NCP_D2519	GAATTAAATCTTGCGCATGTGCAGATTTTAAAATAGGTCTTGATTCGCTTGACGCTGCTG	1873.63	7801.39
NCP_D2527	CTAATATGGCCACTCAACGTGCCCAAGGAAAGTTTCGTCTTGATTCGCTTGACGCTGCTG	121.234	6831.26
NCP_D2722	CTATGTGCTGACTCCAATGAAATAACTCTAAAATTCGTCTTGATTCGCTTGACGCTGCTG	96.6341	1443.41
NCP_D2730	CTAAAAAATCAAGAAAACGTGCCACGAGTGTGGTTCGTCTTGATTCGCTTGACGCTGCTG	798.678	14042.9
NCP_D2831	GAACACTGGTACTGGCACGGGTGTTTGGAAAAATAGGTCTTGATTCGCTTGACGCTGCTG	155.741	3803.19
NCP_D294	GAAATCCATTATCCACACGTTGCTGTGTCGACTTAGGTCTTGATTCGCTTGACGCTGCTG	135.684	6579.6
NCP_D2962	GAACGAGTTCGAGGGCACGTTAGTTGGTTTCGATAGGTCTTGATTCGCTTGACGCTGCTG	139.607	4137.16
NCP_D2970	CTATCTGTGGCTTCCCACGTTGTGTTAGCATTATTCGTCTTGATTCGCTTGACGCTGCTG	310.435	10472.4
NCP_D302	CTAACTGAGACCATCCACGTTGTGGGCACCACCTTCGTCTTGATTCGCTTGACGCTGCTG	108.702	7478.07
NCP_D3023	CTAGACATTCTGGCCAACGTGCATTCGACGGAATTCGTCTTGATTCGCTTGACGCTGCTG	79.9979	7775.75
NCP_D3053	CTACCAATTCCACGGCACATGTAGATCTGCGAGTTCGTCTTGATTCGCTTGACGCTGCTG	247.376	3585.96
NCP_D316	CTAGAAAGAATGCTCAACGTGAGTATGATAACCTTCGTCTTGATTCGCTTGACGCTGCTG	251.174	3726.7
NCP_D3188	GAAGGAAATCAGTTGCATGTGCCCAAGGAATGGTAGGTCTTGATTCGCTTGACGCTGCTG	376.895	4613.64
NCP_D3272	GAAAGATCAACGAAGCACGCGATGAAATTCTGCTAGGTCTTGATTCGCTTGACGCTGCTG	203.984	4003.27
NCP_D330	CTAAGAACGCTGAAACACGTTGTTCACATCACCTTCGTCTTGATTCGCTTGACGCTGCTG	129.317	9498.04
NCP_D3313	CTACCATCCTTTCTGCACATGTTACGCTGTTTATTCGTCTTGATTCGCTTGACGCTGCTG	278.092	5683.15
NCP_D370	CTACGATGTTCAAACAACGTGTTATCAGAGAAATTCGTCTTGATTCGCTTGACGCTGCTG	156.728	8364.9
NCP_D3762	GAAAGCAAATTCACACACGTTGTAGACGGCTGTTAGGTCTTGATTCGCTTGACGCTGCTG	73.2902	7100.27
NCP_D38	GAAGAATACGAAAAACACGAGGTATACCAAGGCTAGGTCTTGATTCGCTTGACGCTGCTG	164.061	6114.34
NCP_D3827	GAACGCAACTGCAACCACATGCAAATGCTGGCATAGGTCTTGATTCGCTTGACGCTGCTG	115.688	3076.31
NCP_D3935	CTATTCTCACTCGTATACGCAATCATTTAAATATTCGTCTTGATTCGCTTGACGCTGCTG	73.2858	1695.08
NCP_D4058	GAAGTATGCCAAGGCCTCGTGCATGTAGTGCGATAGGTCTTGATTCGCTTGACGCTGCTG	79.9253	5185.8
NCP_D4113	GAATTTTTTGTGTGGCATGTGCAGCGAGCGATGTAGGTCTTGATTCGCTTGACGCTGCTG	464.315	4912.84
NCP_D4180	GAATGCTGTTGGGAAAACGTGCCTTCTAATCTCTAGGTCTTGATTCGCTTGACGCTGCTG	343.198	14065.7
NCP_D4360	GAAATCGTTCATCTCCTCGTGTTTTGGGGAGGATAGGTCTTGATTCGCTTGACGCTGCTG	149.548	4305.94
NCP_D4529	GAAACTGCCCACGAGCACATGGGGTGAGTTATATAGGTCTTGATTCGCTTGACGCTGCTG	221.418	8949.95
NCP_D4534	CTAATAAGGTGTCAGCATGTGGGGTGAGGATAATTCGTCTTGATTCGCTTGACGCTGCTG	233.329	6570.67
NCP_D4554	GAACAGTATCTACTGCACGTTCTTCCGTAAGTATAGGTCTTGATTCGCTTGACGCTGCTG	159.308	9723.46
NCP_D4576	CTATGGGCGAAGGTGCACGTTCTGGTATTACACTTCGTCTTGATTCGCTTGACGCTGCTG	342.515	10051.9
NCP_D4600	GAAAAGATCACGTACCATGTGCAGAATCTGAGATAGGTCTTGATTCGCTTGACGCTGCTG	4627.66	5596.33
NCP_D5158	GAATTCTGTTCATCGCATGTGCATATATATATATAGGTCTTGATTCGCTTGACGCTGCTG	229.905	5866.53
NCP_D5163	CTAAAGGTACTTTTGCATGTGGGCGTCCACAGGTTCGTCTTGATTCGCTTGACGCTGCTG	106.384	3584.78
NCP_D5287	CTAATGTGTCAACTTCGCGTGCTCGTAAAAAAGTTCGTCTTGATTCGCTTGACGCTGCTG	94.8721	3425.28
NCP_D5317	CTATGATGGTGGTGGCACGCGATAGTACGGCACTTCGTCTTGATTCGCTTGACGCTGCTG	217.112	3257.01
NCP_D5369	CTACCGGGTCCCACACATGTGCGCCCTTAGCCTTTCGTCTTGATTCGCTTGACGCTGCTG	135.854	6182.72
NCP_D538	CTAAGAAATCTGCTGCACATGCCACACGCAGTATTCGTCTTGATTCGCTTGACGCTGCTG	297.804	5065.13
NCP_D5536	GAACTACACGAGTCGCACGAGGACCCTGAAAAATAGGTCTTGATTCGCTTGACGCTGCTG	195.069	7577.97
NCP_D5636	GAATGGCGAAAAATGCACGCGCGTAAATAATGATAGGTCTTGATTCGCTTGACGCTGCTG	189.549	6243.93
NCP_D5722	GAAAGAATGGCAAACCACATGCAAGCATCCAGTTAGGTCTTGATTCGCTTGACGCTGCTG	134.137	3106.22
NCP_D5729	CTATAACCCAGTTTCAACGTGTTATTACTCAACTTCGTCTTGATTCGCTTGACGCTGCTG	93.296	4316.57
NCP_D5757	GAAATTGGGCCAAGGCACGTTTGGTAAAGTACTTAGGTCTTGATTCGCTTGACGCTGCTG	68.5562	6411.69
NCP_D5801	GAACCCCGTATCCCGCACGTTGTTAAGTTAAACTAGGTCTTGATTCGCTTGACGCTGCTG	169.974	9476.94
NCP_D5856	CTAGTTAAAATGAACCATGTGCAAATCAGAAACTTCGTCTTGATTCGCTTGACGCTGCTG	307.895	4327.67
NCP_D5962	GAACTAGGGAAATTGCACATGGAAGTATCTGGATAGGTCTTGATTCGCTTGACGCTGCTG	149.55	2921.14
NCP_D6063	GAACTCGGTATATCCAACGTGCAGGCCAATATCTAGGTCTTGATTCGCTTGACGCTGCTG	128.153	6515.49
NCP_D6246	CTACACCTTCCTTAGCACGGGTTCTTGCTGTCTTTCGTCTTGATTCGCTTGACGCTGCTG	298.5	4607.5
NCP_D6417	GAACTTATCGCTTTGCACGCGACTCTTTTTTCTTAGGTCTTGATTCGCTTGACGCTGCTG	314.489	3126.32
NCP_D6522	GAACGTTCTTTTTTTCGCGTGCTGTGCAAGAAATAGGTCTTGATTCGCTTGACGCTGCTG	95.7267	3539.11
NCP_D6640	GAATGTCGGAATCAGCACGCGCAAGAACCAAATTAGGTCTTGATTCGCTTGACGCTGCTG	351.966	6452.1
NCP_D6685	GAACCTGAATGGAAAAACGTGCCCCCATATATGTAGGTCTTGATTCGCTTGACGCTGCTG	498.115	16964.9
NCP_D6705	GAAGGTATTAGCATGCACGTTTTCTTTCCTTTGTAGGTCTTGATTCGCTTGACGCTGCTG	491.436	12057.8
NCP_D6777	GAACATGAAAAGGTCCACGTTGCTGTCGCTGGATAGGTCTTGATTCGCTTGACGCTGCTG	109.664	10434.9
NCP_D68	GAATCACTTGATGTCATCAAGGCATTCACCAGATAGGTCTTGATTCGCTTGACGCTGCTG	195.186	1286.59
NCP_D6809	CTATGCACTTGAAACAACGTGTAGACCATCACGTTCGTCTTGATTCGCTTGACGCTGCTG	211.962	7384.59
NCP_D6892	CTATCGAACATTTCTACCACTAATCACACCAGGTTCGTCTTGATTCGCTTGACGCTGCTG	85.7893	1492.64
NCP_D7046	GAAGATGAATCCTGGCACGGGTTTGATTCTGATTAGGTCTTGATTCGCTTGACGCTGCTG	388.316	3891.99
NCP_D7130	CTATCTTGTTTCAGGCACGTTCATGTTAGTGTCTTCGTCTTGATTCGCTTGACGCTGCTG	179.83	8275.75
NCP_D7169	GAAAAATCGTGCAAGAACGTGAGGATCTGTATATAGGTCTTGATTCGCTTGACGCTGCTG	156.347	5405.13
NCP_D7218	GAATCCTGCACACTGCACGTTGAGACCTGAATCTAGGTCTTGATTCGCTTGACGCTGCTG	100.793	5316.86
NCP_D7267	GAATCCAAGAACTACCTCGTGCCATACCTGTTATAGGTCTTGATTCGCTTGACGCTGCTG	399.333	10146.1
NCP_D7524	GAAGGTTATCCATGCCTCGTGTTGCTGCCAAGATAGGTCTTGATTCGCTTGACGCTGCTG	129.76	5052.44
NCP_D770	GAACATCCTAACGAGCACATGTCGGTGGACCAATAGGTCTTGATTCGCTTGACGCTGCTG	184.702	4627.86
NCP_D857	CTATTATACCACCACCACATGCCATACTCACCCTTCGTCTTGATTCGCTTGACGCTGCTG	183.018	5556.74
NCP_N1004	CTATAAAAAGAAAAACACGAGGGGACCAGGTTGTTCGTCTTGATTCGCTTGACGCTGCTG	210.505	6840.59
NCP_N1027	GAAAAGAAAATTCAGCATGTGCGAAGGAAGGTATAGGTCTTGATTCGCTTGACGCTGCTG	218.715	6350.86
NCP_N1040	CTACGCGATCAGCCGCACATGTCCATTATCATTTTCGTCTTGATTCGCTTGACGCTGCTG	325.238	5546.46
NCP_N1052	GAAATATACCACAGTAACGTGCAGGTAAAACATTAGGTCTTGATTCGCTTGACGCTGCTG	531.39	4247.01
NCP_N1059	GAACGGTAACCAATTCACGTTGCCGATCGAGGTTAGGTCTTGATTCGCTTGACGCTGCTG	67.8762	3289.61
NCP_N1071	GAATTTTGTGATGGCCACGAGGGTCCTTTCACTTAGGTCTTGATTCGCTTGACGCTGCTG	197.037	9187.86
NCP_N1080	CTAGGACATTATAACAACGTGCAGATGGTGATGTTCGTCTTGATTCGCTTGACGCTGCTG	150.085	7866.45
NCP_N1108	CTAGGCATAAAGAGGCACATGCGTCGTTTGTAGTTCGTCTTGATTCGCTTGACGCTGCTG	272.491	6899.1
NCP_N1113	GAACCTAACTACGAGCACGTACGTCTAGAATTCTAGGTCTTGATTCGCTTGACGCTGCTG	96.7837	3130.08
NCP_N1137	GAACTTTATATATCCCACGAGGAGACTGCGCGATAGGTCTTGATTCGCTTGACGCTGCTG	133.1	7757.46
NCP_N1145	GAATATCTCTAGTATAACGTGCCGTATATTTCCTAGGTCTTGATTCGCTTGACGCTGCTG	466.145	4748.9
NCP_N1157	GAAGGCGCCACAGGGCACATGGAGTTTATTTATTAGGTCTTGATTCGCTTGACGCTGCTG	293.702	4580.78
NCP_N1175	CTATTTTTCGTGACGCACATGTCTTCAACTGCATTCGTCTTGATTCGCTTGACGCTGCTG	269.651	6919.59
NCP_N1217	CTATTCCCGGTTATGCACGAGGTCAATGAGACCTTCGTCTTGATTCGCTTGACGCTGCTG	255.374	8417.58
NCP_N1234	CTATTGTATCAGGCTAACGTGCACTTGGAAGGTTTCGTCTTGATTCGCTTGACGCTGCTG	170.454	3574.99
NCP_N1243	CTAGGGAAGACTCAGCACGTTATATACTATTAATTCGTCTTGATTCGCTTGACGCTGCTG	197.232	4736.85
NCP_N1250	GAACTTTTTAATATCCTCGTGCTGCTCAAGGTATAGGTCTTGATTCGCTTGACGCTGCTG	379.461	8190.59
NCP_N1278	GAAATTTGATCATAGCATGTGCTCTATATTGTATAGGTCTTGATTCGCTTGACGCTGCTG	854.203	6484.26
NCP_N1315	GAAGCAAGGATAATCCACATGCCGAAAATACGATAGGTCTTGATTCGCTTGACGCTGCTG	138.654	3665.21
NCP_N1321	CTATTGAAAATATACAACGTGGTTACATAAAGATTCGTCTTGATTCGCTTGACGCTGCTG	446.714	14264.6
NCP_N1332	GAAATCTTCAATGGACCCGTGCTTTGTAACCCGTAGGTCTTGATTCGCTTGACGCTGCTG	217.73	3796.47
NCP_N136	GAATATTCCCATAATAACGTGCAAAAGTCCCTATAGGTCTTGATTCGCTTGACGCTGCTG	335.177	3994.08
NCP_N1365	CTACAATTAAAAAAACACGAGGAACAGAATGTCTTCGTCTTGATTCGCTTGACGCTGCTG	277.103	5721.72
NCP_N1372	GAATATTGTGATGCGCACGTTGAAATTCACTATTAGGTCTTGATTCGCTTGACGCTGCTG	132.927	7253.67
NCP_N139	GAATGTGCAGCACTGCATGTGCGAATGGTCCATTAGGTCTTGATTCGCTTGACGCTGCTG	61.8231	3513.96
NCP_N1398	GAAGGGAGACACAAACACGAGGTAAGTCTCAAATAGGTCTTGATTCGCTTGACGCTGCTG	186.274	6097.09
NCP_N1407	CTAGCCGATACGGCACCCGTGCGATACGAGACATTCGTCTTGATTCGCTTGACGCTGCTG	96.5118	3120.93
NCP_N1432	CTAGGGAGGGAGGCGCATGTGCTCTATTACTTTTTCGTCTTGATTCGCTTGACGCTGCTG	465.217	11051.2
NCP_N1454	CTAGTCAGGAGGGTGCACGTTGAAGCAGTGCGTTTCGTCTTGATTCGCTTGACGCTGCTG	110.958	6802.61
NCP_N1541	CTACGACGCCGTAGTCGCGTGCCCTTGCCCTTATTCGTCTTGATTCGCTTGACGCTGCTG	118.819	3478.23
NCP_N1557	GAAGAGCGCGCTGGGCATGTGCAATTCACATTTTAGGTCTTGATTCGCTTGACGCTGCTG	120.044	4023.01
NCP_N1564	CTACGATACCCTATGAACGTGCACCTTTTTTGTTTCGTCTTGATTCGCTTGACGCTGCTG	194.892	8026.99
NCP_N1573	CTATGTAATTTTTGGCATGTGCTATTGTATGAATTCGTCTTGATTCGCTTGACGCTGCTG	511.969	5522.96
NCP_N1588	GAAGAATATTCAAGCCATGTGCAGAAATAGACGTAGGTCTTGATTCGCTTGACGCTGCTG	581.004	6193.77
NCP_N1628	CTATCTCGAGGTGCCCACATGCAATCTTTACTGTTCGTCTTGATTCGCTTGACGCTGCTG	119.053	4630.62
NCP_N1648	GAAATAATCGGTCACCTCGTGTGTCGTGATAAATAGGTCTTGATTCGCTTGACGCTGCTG	1070.85	7435.39
NCP_N1652	GAAATCAATATAAGCAACGTGAAACGATCGAAGTAGGTCTTGATTCGCTTGACGCTGCTG	118.148	4444.18
NCP_N167	CTAATTTTCACGCAGAACGTGCCTAAGAAAAAATTCGTCTTGATTCGCTTGACGCTGCTG	189.856	10879
NCP_N1670	CTATTGATAATTTGGCATGTGCGATCTCTTCGATTCGTCTTGATTCGCTTGACGCTGCTG	213.032	4968.17
NCP_N1722	GAATTTTCATATATGCACATGTAAATATATGCGTAGGTCTTGATTCGCTTGACGCTGCTG	256.693	3600.77
NCP_N1735	CTATTTCTGCTCCATCGCGTGCTCGAGACTATATTCGTCTTGATTCGCTTGACGCTGCTG	156.437	4281.19
NCP_N1739	CTACGCTTGTTTAAACATGTGCTAGGTAAGCGATTCGTCTTGATTCGCTTGACGCTGCTG	266.562	5105.7
NCP_N174	CTACGCTCTTGTTTTCGCGTGCCTCTTCTACAATTCGTCTTGATTCGCTTGACGCTGCTG	106.808	2756.91
NCP_N1752	CTAGCCCTCCTTCGGCACGCGGCTCGGAACATATTCGTCTTGATTCGCTTGACGCTGCTG	54.864	3269.61
NCP_N1763	GAAGAACGATACGCCCTCGTGTATATACAGTATTAGGTCTTGATTCGCTTGACGCTGCTG	191.402	5414.79
NCP_N1770	GAATACAAAAAAAGGCATGTGGGTGAATTACAATAGGTCTTGATTCGCTTGACGCTGCTG	134.616	8449.44
NCP_N1771	GAAAGAAACATATACCTCGTGCTAAAGAAAATATAGGTCTTGATTCGCTTGACGCTGCTG	934.293	9563.16
NCP_N1772	CTAAAAATTGACCTGCACATGGAGAAAGCGTAATTCGTCTTGATTCGCTTGACGCTGCTG	154.214	3512.1
NCP_N1793	GAATACTGTCCCTCCCCCGTGCACAGCATGTTGTAGGTCTTGATTCGCTTGACGCTGCTG	203.752	5674.58
NCP_N1795	CTATTGATGCTCGCCAACGTGAGATAGCTGGTCTTCGTCTTGATTCGCTTGACGCTGCTG	68.7457	2801.33
NCP_N1818	CTAAGAATAATACGGCACGTTAAATGTTATTTTTTCGTCTTGATTCGCTTGACGCTGCTG	352.114	3338.4
NCP_N1821	CTAGGACATTCATGCAACGTGGTAAATATGTGTTTCGTCTTGATTCGCTTGACGCTGCTG	159.729	11099.5
NCP_N1823	GAAATACATACAGAGCACATGCATGCCATATGATAGGTCTTGATTCGCTTGACGCTGCTG	471.603	6508.96
NCP_N1831	CTAAGCGAGTCAGAGCACATGTTTAGACAATATTTCGTCTTGATTCGCTTGACGCTGCTG	339.421	7255.3
NCP_N1832	CTAAGGTGGTGTTTCCTCGTGTCCGTATCAAGCTTCGTCTTGATTCGCTTGACGCTGCTG	114.491	5649.07
NCP_N1833	GAACGTATTTGCGCTCACGTTGCACGAACACGGTAGGTCTTGATTCGCTTGACGCTGCTG	713.321	4554.69
NCP_N1850	GAACCGAAAATAAAGCACATGTAAAGCATTAAGTAGGTCTTGATTCGCTTGACGCTGCTG	366.52	4366.52
NCP_N1860	GAATGAAAATAACGGCACGTTCCATGCTTCAAATAGGTCTTGATTCGCTTGACGCTGCTG	226.957	10772.3
NCP_N1865	GAAAAAATGATACTACATGTGCATGAAGTATTATAGGTCTTGATTCGCTTGACGCTGCTG	191.16	4128.91
NCP_N1875	GAAAGACAAAATATCAACGTGTTTTATTTATACTAGGTCTTGATTCGCTTGACGCTGCTG	306.196	7364.54
NCP_N1876	GAAATATGAGTTTCTAACGTGCAATGTTTGGTGTAGGTCTTGATTCGCTTGACGCTGCTG	107.296	3106.51
NCP_N1877	CTATGTGGTATTGAGCACGCGGTACTAGAAGGATTCGTCTTGATTCGCTTGACGCTGCTG	220.194	6398.15
NCP_N1889	GAATATTAGTTGTAGCATGTGCTCATCTCCATGTAGGTCTTGATTCGCTTGACGCTGCTG	794.521	7305.4
NCP_N1912	CTATGCTCGGTCGACAACGTGTATGTTTTTGCCTTCGTCTTGATTCGCTTGACGCTGCTG	183.014	7047.93
NCP_N1939	CTAAGGAACAAGAAGCACGGGTACTCGTGTTAGTTCGTCTTGATTCGCTTGACGCTGCTG	247.521	5201.4
NCP_N1941	GAACGATACAATACGCACGAGGATAATAAGCCCTAGGTCTTGATTCGCTTGACGCTGCTG	130.624	8204.03
NCP_N1953	CTAACCTCACCTTACCACATGTTGGTCCGTTGCTTCGTCTTGATTCGCTTGACGCTGCTG	103.399	5737.78
NCP_N1966	GAATCATGGAAGTGGCACGTTTGTGCTTCGGCGTAGGTCTTGATTCGCTTGACGCTGCTG	124.863	7132.57
NCP_N1968	CTAAACTAGGCCCAGCACGGGTTTGGCGAGGCCTTCGTCTTGATTCGCTTGACGCTGCTG	85.2898	2335.42
NCP_N1969	CTATTCAACTTATTTAACGTGCCCAATGGAAATTTCGTCTTGATTCGCTTGACGCTGCTG	130.824	3657.99
NCP_N1980	CTATCCAGTCTCATGCACATGTCAAATATGTGGTTCGTCTTGATTCGCTTGACGCTGCTG	498.633	6296.59
NCP_N1984	GAATTTATTTTATTGCATGTGCTGTTTTCCCCATAGGTCTTGATTCGCTTGACGCTGCTG	718.648	5790.46
NCP_N1987	GAATTTTGGACTTTTCACGTTGCAGGGACAGCATAGGTCTTGATTCGCTTGACGCTGCTG	113.857	2865.03
NCP_N1989	GAATCTTCGCAAGTACATGTGCGCAGCAGCCATTAGGTCTTGATTCGCTTGACGCTGCTG	204.375	4629.26
NCP_N1990	GAATTTGTTTCCGCCCATGTGCTCCCTCTACCGTAGGTCTTGATTCGCTTGACGCTGCTG	274.771	6214.8
NCP_N1998	GAATCCTTGTACCAGCACATGGCCGAGCTTGAATAGGTCTTGATTCGCTTGACGCTGCTG	106.986	4227.46
NCP_N2014	GAATCTAGTTTTCAACATGTGGTGGCTTGTTCTTAGGTCTTGATTCGCTTGACGCTGCTG	225.901	4563.68
NCP_N2017	CTATGTAGTCCTCAACATGTGCAGACGAATAAATTCGTCTTGATTCGCTTGACGCTGCTG	172.169	5226.17
NCP_N2022	CTAGATATGGACAAACACGTTGTTTTGATTTCTTTCGTCTTGATTCGCTTGACGCTGCTG	601.205	11445.5
NCP_N2028	GAAATGCTGCACAAAAACGTGCCAGCAATGCAATAGGTCTTGATTCGCTTGACGCTGCTG	374.208	12855.2
NCP_N2040	CTATGTCTTTTCTACCACATGCACAATGAAAGCTTCGTCTTGATTCGCTTGACGCTGCTG	285.664	4922.99
NCP_N2047	GAAAAATGAAATCTCAACGTGGTTGTAAGAGTTTAGGTCTTGATTCGCTTGACGCTGCTG	88.1495	6384.9
NCP_N2066	GAACTCTGCGCAGTGCACGTTCAAAAGAAAAGCTAGGTCTTGATTCGCTTGACGCTGCTG	104.039	6213.09
NCP_N2075	GAATCCTTTGGTTTGCACGCGCGCTATGTTATCTAGGTCTTGATTCGCTTGACGCTGCTG	117.048	5562.19
NCP_N2079	GAACAGTCATACAAGCACGAGGAAAAAGAGGACTAGGTCTTGATTCGCTTGACGCTGCTG	168.396	6348.69
NCP_N2103	CTATAATAAATAGTACACGTTGCAGACATATTTTTCGTCTTGATTCGCTTGACGCTGCTG	176.688	8738.41
NCP_N2137	CTAAGTATCAAAAGAAACGTGCATAAGGACATGTTCGTCTTGATTCGCTTGACGCTGCTG	149.805	10155.5
NCP_N2176	CTATGCAGGACTGGGCACGTTTTACAATACGTATTCGTCTTGATTCGCTTGACGCTGCTG	216.247	12174.9
NCP_N220	GAAAGGTTTGCCTTCCACGTTGAAGTACTAAAATAGGTCTTGATTCGCTTGACGCTGCTG	70.9252	4431.83
NCP_N2205	GAAACTAATTTAAACAACGTGTATTATTGTGCTTAGGTCTTGATTCGCTTGACGCTGCTG	209.523	8490.73
NCP_N2225	GAATTGCTATAGCGTAACGTGCGTCACTAGTCTTAGGTCTTGATTCGCTTGACGCTGCTG	83.6495	4030.34
NCP_N2227	GAAAAATACAAAGACAACGTGGGCTGATTACAGTAGGTCTTGATTCGCTTGACGCTGCTG	279.303	17795
NCP_N2229	CTAAAAACTTTTATCCACATGCAGTAAAAATAATTCGTCTTGATTCGCTTGACGCTGCTG	196.064	4291.5
NCP_N2251	GAAATGCCCAGGGAACACGTTGATTTAGAAGCATAGGTCTTGATTCGCTTGACGCTGCTG	164.649	6916.34
NCP_N2252	CTATTTTGGAAAAGCAACGTGCGCAACAATGAATTCGTCTTGATTCGCTTGACGCTGCTG	341.832	12203
NCP_N227	GAAATAATAAAAGAAAACGTGCATATATACATATAGGTCTTGATTCGCTTGACGCTGCTG	644.717	11155
NCP_N2276	GAACGAGGTTTTAAAAACGTGTGATTAGCTTGATAGGTCTTGATTCGCTTGACGCTGCTG	211.034	7173.09
NCP_N2321	CTAGGAGGATGCCCCCATGTGCTGATTCTCCCCTTCGTCTTGATTCGCTTGACGCTGCTG	106.932	5319.93
NCP_N2338	CTAAAAATTTTTGTTCACGTTGAACAGAGGGTATTCGTCTTGATTCGCTTGACGCTGCTG	517.699	3066.13
NCP_N2356	GAAGACTATTTTGACCATGTGCTCAACTAGAAGTAGGTCTTGATTCGCTTGACGCTGCTG	4686.54	6878.38
NCP_N2358	GAATTTGATTGGTCTCACGTTGGCTTGTATATTTAGGTCTTGATTCGCTTGACGCTGCTG	236.995	4315.36
NCP_N2359	GAATTATGAGCTACCCTCGTGGCCTGAAAGATGTAGGTCTTGATTCGCTTGACGCTGCTG	179.935	8907.81
NCP_N2362	GAATCCAAGTCAGGACACGGGGAAAATCTTTACTAGGTCTTGATTCGCTTGACGCTGCTG	156.433	3268.97
NCP_N2368	CTAACTTGACTGCACCTCGTGTCGGAAGATTTTTTCGTCTTGATTCGCTTGACGCTGCTG	198.239	6071
NCP_N2381	CTACAATCATTCGCGCACGAGGCATGGACAGAATTCGTCTTGATTCGCTTGACGCTGCTG	206.342	8840.31
NCP_N2391	GAAAGGTTCTATCCCCATGTGCCTCGTCATCGGTAGGTCTTGATTCGCTTGACGCTGCTG	104.459	5752.44
NCP_N2410	GAAAAGCGTCTGAACCACATGCTTCTTCTATCTTAGGTCTTGATTCGCTTGACGCTGCTG	135.938	4149.37
NCP_N2444	GAATAAAACTAGTGGCACGTTTAAATGACTTTTTAGGTCTTGATTCGCTTGACGCTGCTG	135.195	8065.65
NCP_N2456	CTACCCACCCATTCGCACGGGTCTTCTGTGCGATTCGTCTTGATTCGCTTGACGCTGCTG	109.124	2973.16
NCP_N2492	CTAGTCACTGTCAAACACGTTGCATTGATTAGATTCGTCTTGATTCGCTTGACGCTGCTG	112.933	8268.42
NCP_N2496	CTAATTTTGTAGGTGCACGTTTGCAACTTTATTTTCGTCTTGATTCGCTTGACGCTGCTG	170.928	8029.01
NCP_N2499	CTAACCAATAGAGTGCACGTTTCTTGATGCTATTTCGTCTTGATTCGCTTGACGCTGCTG	221.726	11528.1
NCP_N2523	GAATAACTCATCTTGCACATGCTATTCTTTTCGTAGGTCTTGATTCGCTTGACGCTGCTG	221.254	5018.02
NCP_N2543	GAAACAGGAGTTCTGCATGTGCGTAATTCGAAGTAGGTCTTGATTCGCTTGACGCTGCTG	109.71	4548.28
NCP_N2556	GAAGACAATTGTTGCCTCGTGGCGGGGCTATTTTAGGTCTTGATTCGCTTGACGCTGCTG	225.272	6122.48
NCP_N2564	CTAGTTTTCAAACAACATGTGCCATGTAAGATATTCGTCTTGATTCGCTTGACGCTGCTG	579.138	6863.96
NCP_N2588	CTATGTTAATAGATGCACGTTTCATTGACATCTTTCGTCTTGATTCGCTTGACGCTGCTG	173.281	8248.61
NCP_N2592	CTAACCACATCTTCAAACGTGCATATAGAATGGTTCGTCTTGATTCGCTTGACGCTGCTG	212.295	6168.17
NCP_N2599	GAACCTCTTGCTGTCCACATGTGTTGAGTGTCATAGGTCTTGATTCGCTTGACGCTGCTG	160.731	4643
NCP_N2600	GAAAAGATCGTAAGCAACGTGTTCAACACGTACTAGGTCTTGATTCGCTTGACGCTGCTG	975.619	9075.72
NCP_N2608	GAAACAACGTGCGTCCATGTGCAAGAACAAGTATAGGTCTTGATTCGCTTGACGCTGCTG	246.92	12417.8
NCP_N2616	CTATAGAAAGATAGGCACATGCCAATTGTGTGCTTCGTCTTGATTCGCTTGACGCTGCTG	237.344	5817.47
NCP_N2617	CTAATACAGGAGTGCCACATGCGAAAGCGGAGTTTCGTCTTGATTCGCTTGACGCTGCTG	140.599	3378.77
NCP_N2623	GAACGCGATCAGCCGCACATGGGCATTATCATTTAGGTCTTGATTCGCTTGACGCTGCTG	184.761	6118.26
NCP_N2654	GAAAATGGATATATACATGTGGTACTATTTCTCTAGGTCTTGATTCGCTTGACGCTGCTG	210.502	3906.75
NCP_N2659	GAACTTTTGTTTTAACACGTTGAGACTATCTAATAGGTCTTGATTCGCTTGACGCTGCTG	66.3706	5295.16
NCP_N2676	GAATTAACATATTAGCACGGGGAGGCCGATGTTTAGGTCTTGATTCGCTTGACGCTGCTG	202.268	3867.55
NCP_N2681	GAAAACATGCTGGATAACGTGCATGATTCAATTTAGGTCTTGATTCGCTTGACGCTGCTG	683.17	4894.2
NCP_N2685	CTAGAACAAATTTTCCACATGCTTGTGCCTGCTTTCGTCTTGATTCGCTTGACGCTGCTG	112.938	3890.55
NCP_N2693	GAAATGATGAATGTGCACATGCTGTCGAAACCATAGGTCTTGATTCGCTTGACGCTGCTG	468.582	6367.08
NCP_N2698	CTATAGGAAATATGACATGTGGGCTATCTGTTTTTCGTCTTGATTCGCTTGACGCTGCTG	213.598	8525.37
NCP_N271	GAAAAAGCTCTCCCCCTCGTGTAATTATGCACGTAGGTCTTGATTCGCTTGACGCTGCTG	101.913	4204.7
NCP_N2719	GAATAAATTCTGCAGAACGTGAAAGGTTCGATTTAGGTCTTGATTCGCTTGACGCTGCTG	124.696	3771.53
NCP_N2726	CTATTGAGTCCACTGCATGTGGAAAACAGAGTTTTCGTCTTGATTCGCTTGACGCTGCTG	84.5655	2024.89
NCP_N2745	GAAATGATCTTCATACACGTTGTAATGCTACTGTAGGTCTTGATTCGCTTGACGCTGCTG	100.852	6860.81
NCP_N2748	CTACTTAAACTACTCCTCGTGCTGTCCACATTTTTCGTCTTGATTCGCTTGACGCTGCTG	316.748	8596.27
NCP_N275	GAATCATGTGATTTCCATGTGCGGCAACTTCAATAGGTCTTGATTCGCTTGACGCTGCTG	9190	4007.83
NCP_N2760	CTAACTAAATATTTCAACGTGTGTCTTTCAATTTTCGTCTTGATTCGCTTGACGCTGCTG	123.614	5236.84
NCP_N2788	CTAAGGATTTATAGGCGCGTGCGTGCAGCCTTATTCGTCTTGATTCGCTTGACGCTGCTG	213.037	6918.27
NCP_N279	GAATAGTAATTTACACACGAGGTGAGGAATACGTAGGTCTTGATTCGCTTGACGCTGCTG	187.062	6735.71
NCP_N2801	CTATTACAAGAGCGCCACGAGGCAAGGAAAAAATTCGTCTTGATTCGCTTGACGCTGCTG	201.332	7689.03
NCP_N2810	GAAAACGTTAACACACATGTGCTTCTTTATTGTTAGGTCTTGATTCGCTTGACGCTGCTG	766.502	9396.46
NCP_N2814	CTACACTACCGTAACAACGTGGTAGTTGGCAGATTCGTCTTGATTCGCTTGACGCTGCTG	160.77	9865.83
NCP_N2829	CTACTTAAATATAGGCACGGGTGTTTAAAGCCGTTCGTCTTGATTCGCTTGACGCTGCTG	278.558	4714.25
NCP_N2838	GAACACGGATTTCAGCACGGGTTTCAGCACGGATAGGTCTTGATTCGCTTGACGCTGCTG	232.247	4446.11
NCP_N2851	GAATTTCGGCGAGCCCTCGTGTTGCTATGGTAATAGGTCTTGATTCGCTTGACGCTGCTG	193.436	5805.07
NCP_N2885	CTAAATGGACGACTCCACGTTGTAGTAGTTGTCTTCGTCTTGATTCGCTTGACGCTGCTG	34.6778	5854.06
NCP_N2903	GAATTTCTATATTTACATGTGGGAAATGTGGTTTAGGTCTTGATTCGCTTGACGCTGCTG	127.645	4149.14
NCP_N2904	CTAGGTAGTCTAAAGAACGTGCATCAGAGAAGATTCGTCTTGATTCGCTTGACGCTGCTG	113.619	10707.6
NCP_N2907	CTAAAGACCCAGAGGCACATGCAAGATAGTTGTTTCGTCTTGATTCGCTTGACGCTGCTG	201.633	4501.74
NCP_N2922	GAAATACGGAGGTACCCCGTGTTGAGATCCAACTAGGTCTTGATTCGCTTGACGCTGCTG	281.908	3505.45
NCP_N2927	CTAAATCCCAGACGTCGCGTGCTAAAAATCCTTTTCGTCTTGATTCGCTTGACGCTGCTG	243.775	4832.65
NCP_N2938	GAAATATTATTTATGCACGTTGCTCATTTAATTTAGGTCTTGATTCGCTTGACGCTGCTG	847.907	13964.9
NCP_N2945	GAAGATCTGCTATTGCATGTGGTGAAAGTTATATAGGTCTTGATTCGCTTGACGCTGCTG	98.8359	3753.01
NCP_N295	GAAGCCAAAGTAAACCCCGTGTACTTTCAAAAGTAGGTCTTGATTCGCTTGACGCTGCTG	369.071	3643.9
NCP_N2967	GAAATTATCAGCCTCCATGTGCTTGCGTGCTGTTAGGTCTTGATTCGCTTGACGCTGCTG	118.663	4287.2
NCP_N2978	GAACCAAACGAAACCCCCGTGCTTCTGTTTCTCTAGGTCTTGATTCGCTTGACGCTGCTG	271.664	6631.36
NCP_N2985	GAATGGTTATACGCGCACATGTATATAAGGAGATAGGTCTTGATTCGCTTGACGCTGCTG	261	5259.04
NCP_N3006	GAAAACAATAAACTCAACGTGTACACTTATGCTTAGGTCTTGATTCGCTTGACGCTGCTG	94.1031	5363.72
NCP_N3011	CTACGGGCGGCTATGCACGTTTGAACAAGTATATTCGTCTTGATTCGCTTGACGCTGCTG	81.7649	5679.15
NCP_N3041	GAAATTCGTACGTCCCATGTGCTCGGTCATACTTAGGTCTTGATTCGCTTGACGCTGCTG	151.779	6356.68
NCP_N3046	GAACTATTTGCTTCTCACGTTCTATAATATAGTTAGGTCTTGATTCGCTTGACGCTGCTG	451.275	4745.37
NCP_N3061	CTAAGCTTTCTATTACATGTGGGAAGACTAATATTCGTCTTGATTCGCTTGACGCTGCTG	138.471	4029.01
NCP_N3062	CTATCCATTTTCTCGCATGTGGCGGTTTTCAGTTTCGTCTTGATTCGCTTGACGCTGCTG	265.649	5020.24
NCP_N307	CTAGCAGGAAATAGCCCCGTGCTATTCCATCCTTTCGTCTTGATTCGCTTGACGCTGCTG	316.723	4057.51
NCP_N3070	GAATGGTGAATTTACAACGTGTTCAATATACTTTAGGTCTTGATTCGCTTGACGCTGCTG	321.107	7772.85
NCP_N311	CTACAAGTAAAATGCAACGTGCAAATGCTGATCTTCGTCTTGATTCGCTTGACGCTGCTG	266.197	9676.46
NCP_N3116	GAAAGTAGCTCGATTCACGTTCTATTAGCGGCATAGGTCTTGATTCGCTTGACGCTGCTG	108.534	3413.57
NCP_N3132	CTAGGTTGCTTCAGGCATGTGCCTGGGAAATGATTCGTCTTGATTCGCTTGACGCTGCTG	200.064	4610.05
NCP_N3145	CTATAATATAATGTGCACGTTCTAAAAATAATTTTCGTCTTGATTCGCTTGACGCTGCTG	885.31	10913.6
NCP_N3184	GAACTGACCATAGTACATGTGCAAGTTATTCAATAGGTCTTGATTCGCTTGACGCTGCTG	187.389	4550.07
NCP_N3211	GAATCGCGTCTTTCGCACGTTGAATCAGAACGATAGGTCTTGATTCGCTTGACGCTGCTG	43.6775	5517.04
NCP_N3214	GAATTTAACTTAAACCCCGTGTTTAGCGAAATTTAGGTCTTGATTCGCTTGACGCTGCTG	730.303	3969.32
NCP_N3239	CTACTCTGCGCAGTGCACGTTCAAAAGAAAAGCTTCGTCTTGATTCGCTTGACGCTGCTG	145.602	6759.61
NCP_N3246	GAAAAATGTATGCAGCACATGTTTTTTAGAGTGTAGGTCTTGATTCGCTTGACGCTGCTG	280.256	6881.19
NCP_N3249	GAAGAATCCTAATTCAACGTGAAATTGGTGGACTAGGTCTTGATTCGCTTGACGCTGCTG	153.975	1918.05
NCP_N3251	CTACGGCGTTACTCGCATGTGCAGATATCAGCGTTCGTCTTGATTCGCTTGACGCTGCTG	137.404	3630
NCP_N3257	GAAAATCATTAGCAGCACATGTCGAGCAACAGATAGGTCTTGATTCGCTTGACGCTGCTG	371.658	5560.09
NCP_N3283	GAAAATGTTTACACGAACGTGCCTGATCGACATTAGGTCTTGATTCGCTTGACGCTGCTG	96.3259	13356.3
NCP_N3305	CTATGAGTAGGATCCAACGTGCCAAAGAATTTATTCGTCTTGATTCGCTTGACGCTGCTG	237.97	8068.81
NCP_N3315	CTATTCTTCTCTGTGCACGTTTTAATGCATGAATTCGTCTTGATTCGCTTGACGCTGCTG	297.086	9431.39
NCP_N3344	GAAATCTTCCGATGGCGCGTGCGTCTATTGTAGTAGGTCTTGATTCGCTTGACGCTGCTG	109.885	6489.2
NCP_N335	CTATTTCGCCATAGCCATGTGCCTATATTAAATTTCGTCTTGATTCGCTTGACGCTGCTG	440.724	6134.67
NCP_N3357	CTATATTCATTTTTCCTCGTGTTGTTATAACGATTCGTCTTGATTCGCTTGACGCTGCTG	191.431	5718.62
NCP_N3360	GAATGTCATAATTACCACATGCCCTTTATATGTTAGGTCTTGATTCGCTTGACGCTGCTG	276.595	5609.09
NCP_N3361	GAAGGTAGTCTAAAGAACGTGCATCAGAGAAGATAGGTCTTGATTCGCTTGACGCTGCTG	168.864	11884.4
NCP_N3366	GAATCATACTAGTCACACGTTGCTCGAGAACAGTAGGTCTTGATTCGCTTGACGCTGCTG	180.917	7507.49
NCP_N3369	GAACATTATAAGATGCACGTTTCAACATACTGTTAGGTCTTGATTCGCTTGACGCTGCTG	255.995	9643.63
NCP_N3393	CTAAGTAAATACCATAACGTGCTCACATTTGTCTTCGTCTTGATTCGCTTGACGCTGCTG	819.022	5395.31
NCP_N3399	CTAGTGCAGCCGGCCCTCGTGCGCCTGCGCCGTTTCGTCTTGATTCGCTTGACGCTGCTG	81.1938	6006.07
NCP_N341	GAATGTATGTTTTTTAACGTGCATAATTATTAATAGGTCTTGATTCGCTTGACGCTGCTG	159.657	3572.61
NCP_N3416	CTACAGGACAGTTTGCACGTTATCAGATAAACTTTCGTCTTGATTCGCTTGACGCTGCTG	720.972	4065.57
NCP_N3433	CTAAACGACTATATGCACGTTGCAGTATTGTTCTTCGTCTTGATTCGCTTGACGCTGCTG	467.475	9780.14
NCP_N3453	GAATGACAAGACTGCCACGTTGATCGCTGCGCTTAGGTCTTGATTCGCTTGACGCTGCTG	141.503	6897.6
NCP_N346	CTACTGCTCTCGCTCCACGTTGTCATCCCACCCTTCGTCTTGATTCGCTTGACGCTGCTG	129.399	9130.42
NCP_N3472	GAATATTATTTAATGCACATGTTAATGGACGGTTAGGTCTTGATTCGCTTGACGCTGCTG	411.145	5094.66
NCP_N3491	CTACGGTGGAGCATGCATGTGCTTACTAGAAGTTTCGTCTTGATTCGCTTGACGCTGCTG	166.172	5500.8
NCP_N3507	GAAGATAAAACTCCGCACGTTGCTTGATTAATTTAGGTCTTGATTCGCTTGACGCTGCTG	417.064	13633.6
NCP_N3509	GAAATACCAGAGTTGCACGTTAGGCTGATAAATTAGGTCTTGATTCGCTTGACGCTGCTG	93.1242	2616.4
NCP_N3522	CTAAATCATATTTCGCACGTTACCCGACTGCTTTTCGTCTTGATTCGCTTGACGCTGCTG	175.045	4849.3
NCP_N3536	CTATCACTTTTTTTACATGTGCTTATATTTAACTTCGTCTTGATTCGCTTGACGCTGCTG	878.13	4329.68
NCP_N3565	GAATATCTTTTTATGCACATGTAATTCTTCCCATAGGTCTTGATTCGCTTGACGCTGCTG	186.216	4098.43
NCP_N3578	GAATACAAAATTTTACATGTGGTACTATTTCTCTAGGTCTTGATTCGCTTGACGCTGCTG	234.95	3358.05
NCP_N358	GAAGTGCAGTAACTCCTCGTGCTTACGCTAACTTAGGTCTTGATTCGCTTGACGCTGCTG	152.948	6015.27
NCP_N3581	CTACGTAGGATTGGACACGAGGTTCTTTTTTTATTCGTCTTGATTCGCTTGACGCTGCTG	632.876	6536.57
NCP_N3582	GAAAACGTTCAAGGCAACGTGTATGTTTGTTATTAGGTCTTGATTCGCTTGACGCTGCTG	124.127	10020.5
NCP_N3587	CTAAGAGACATTGGCCACGAGGAGTGTAGCGGCTTCGTCTTGATTCGCTTGACGCTGCTG	78.4504	5434.08
NCP_N3588	CTAGCGTTATATTTACATGTGGTATATCCGGATTTCGTCTTGATTCGCTTGACGCTGCTG	220.381	3728.75
NCP_N3604	GAACATGTCACTATGCACGTTGTGGGACAATTATAGGTCTTGATTCGCTTGACGCTGCTG	268.213	8470.17
NCP_N3607	GAAAAAAGTTCAAAACATGTGGAACGGGTAACATAGGTCTTGATTCGCTTGACGCTGCTG	137.654	5655.87
NCP_N3635	GAATGGTCCCATGACCATGTGCCGAAATCTTTTTAGGTCTTGATTCGCTTGACGCTGCTG	6321.31	6025.57
NCP_N3646	GAATCTTCTTTTTAGCATGTGCTGTAATTTGGCTAGGTCTTGATTCGCTTGACGCTGCTG	513.706	5892.23
NCP_N3648	GAAATCTGCGCCGTGCACGTTTTTACTTCCCCTTAGGTCTTGATTCGCTTGACGCTGCTG	399.988	11194.7
NCP_N3656	CTATGGGTAGAGCGGCACATGGATGTAACAATCTTCGTCTTGATTCGCTTGACGCTGCTG	118.71	4134.68
NCP_N3670	CTACCGTGCGTTCTCCCCGTGCCTTGATAAGCATTCGTCTTGATTCGCTTGACGCTGCTG	153.336	4433.39
NCP_N371	GAATTTTTGTGATTGAACGTGTGATCTTTTCCTTAGGTCTTGATTCGCTTGACGCTGCTG	178.915	4450.15
NCP_N3739	GAAAATGAGTATCAACACGAGGAACAGTACAGGTAGGTCTTGATTCGCTTGACGCTGCTG	136.135	5452.2
NCP_N3743	GAAATGCATTAGAATAACGTGCCGTTAATTTTGTAGGTCTTGATTCGCTTGACGCTGCTG	1109.3	5096.37
NCP_N3749	CTAATATTATACGAAAACGTGCAGAACGGCACATTCGTCTTGATTCGCTTGACGCTGCTG	215.399	9133.53
NCP_N3765	GAACAGACTCTCCTGCACGTTCCATACTATGTTTAGGTCTTGATTCGCTTGACGCTGCTG	139.326	9425.45
NCP_N3784	CTACCAATAGAGCCGCACATGTAATTACTGGTTTTCGTCTTGATTCGCTTGACGCTGCTG	206.119	3686.65
NCP_N3793	GAAGTTATTGCAATCAACGTGAGCCTTAACCAATAGGTCTTGATTCGCTTGACGCTGCTG	336.451	3724.45
NCP_N3825	CTATGCTTTTGTTCGCATGTGGTGTTATTCCAGTTCGTCTTGATTCGCTTGACGCTGCTG	222.239	5445.23
NCP_N3880	CTAAATTGCGGGCAGCACATGTATATATTATACTTCGTCTTGATTCGCTTGACGCTGCTG	177.457	5824.14
NCP_N3883	CTAAAAAGAAACAAGCACGCGCAAGAAAACCGCTTCGTCTTGATTCGCTTGACGCTGCTG	263.515	7026.65
NCP_N3905	GAACGGTCCGGGTGACACGTCCGCCGTGCTTCATAGGTCTTGATTCGCTTGACGCTGCTG	61.5196	1879.67
NCP_N3911	CTAAAGCTAATCGTGCACGTAAACAACAATCTATTCGTCTTGATTCGCTTGACGCTGCTG	120.817	3769.51
NCP_N3913	CTACTATCTGAACTGCACGTTTAAATTTTTACCTTCGTCTTGATTCGCTTGACGCTGCTG	117.429	6332.31
NCP_N3916	GAATGATAACGCTTCAACGTGCAAAGGAACCGTTAGGTCTTGATTCGCTTGACGCTGCTG	191.232	5634.51
NCP_N393	GAATGTATCATTGCCCTCGTGTTAGATTGGTGATAGGTCTTGATTCGCTTGACGCTGCTG	252.851	6478.12
NCP_N3939	GAAAAATTATCGAAGCACGGGTATAGTTAATTGTAGGTCTTGATTCGCTTGACGCTGCTG	564.653	5295.21
NCP_N3958	CTACCGGAAATAAAGCACATGTAAAGCATTGAGTTCGTCTTGATTCGCTTGACGCTGCTG	254.663	3691.11
NCP_N3984	CTATTGATATGCATGCATGTGGACGCAAGCACATTCGTCTTGATTCGCTTGACGCTGCTG	158.046	4845.1
NCP_N3992	CTATATGTATGTATGCACATGCAATTCCTACATTTCGTCTTGATTCGCTTGACGCTGCTG	151.055	4520.54
NCP_N4041	GAAAGCCCAAAACTTAACGTGCACCAACACGTGTAGGTCTTGATTCGCTTGACGCTGCTG	16115	15063.2
NCP_N4060	CTAAATTTTCAATAGCATGTGCATATGTTTAATTTCGTCTTGATTCGCTTGACGCTGCTG	338.824	5448.89
NCP_N4086	GAACATTAAAAGCCGCATGTGGCATCCTGAATTTAGGTCTTGATTCGCTTGACGCTGCTG	269.099	5720.38
NCP_N4087	CTATACCATGTGCGCCACGAGGCCTCAAACGTATTCGTCTTGATTCGCTTGACGCTGCTG	455.745	12452.8
NCP_N4091	CTAGCTTTCGATTACCATGTGCAATCTGTCTATTTCGTCTTGATTCGCTTGACGCTGCTG	167.109	4520.3
NCP_N4092	GAATATTCATGCTTGCACGTTATACCTGGCCGGTAGGTCTTGATTCGCTTGACGCTGCTG	145.301	3453.78
NCP_N410	CTAGCGCGGATGTGGCACATGCTGTTGAGATCTTTCGTCTTGATTCGCTTGACGCTGCTG	258.604	5418.23
NCP_N4119	CTAAACAATTACCAACATGTGGTACATATTGGATTCGTCTTGATTCGCTTGACGCTGCTG	574.511	6459.19
NCP_N415	GAATATTTTCTCCCACACGAGGATTCTGTGGTTTAGGTCTTGATTCGCTTGACGCTGCTG	87.4858	4187.76
NCP_N4155	GAAGATTAACACGAGAACGTGAGTACTCAATCATAGGTCTTGATTCGCTTGACGCTGCTG	272.868	4492.15
NCP_N4165	GAACCTGGCAAGCACAACGTGTGACACAGAAGATAGGTCTTGATTCGCTTGACGCTGCTG	469.075	7728.27
NCP_N419	CTAAGGATAGTGTGCAACGTGGCATAAGCTATGTTCGTCTTGATTCGCTTGACGCTGCTG	128.444	10388.2
NCP_N4213	CTACGAGAAAACTTGCGCGTGCAGTAGGAAAATTTCGTCTTGATTCGCTTGACGCTGCTG	164.567	6262.07
NCP_N4216	CTATTGTTTATCTTGCACATGGCAAGGCCATCGTTCGTCTTGATTCGCTTGACGCTGCTG	282.661	4124.52
NCP_N4239	CTACAATACGTAAACAACGTGCGAAAATATCTATTCGTCTTGATTCGCTTGACGCTGCTG	234.08	11740
NCP_N4249	CTAATCAGCCACGGCCCCGTGTAAGCCGTAAAGTTCGTCTTGATTCGCTTGACGCTGCTG	115.969	2691.6
NCP_N4251	CTAATATAACATTAACATGTGCATGTACACACGTTCGTCTTGATTCGCTTGACGCTGCTG	271.782	7455.98
NCP_N4253	CTATGCTCAAACGGTCGCGTGCTGAGCGGAACGTTCGTCTTGATTCGCTTGACGCTGCTG	167.829	3025.99
NCP_N4257	GAAACACAGGTTGCGCACATGGGAAGTGCACTATAGGTCTTGATTCGCTTGACGCTGCTG	219.413	6568.7
NCP_N4282	GAATTAGATGGTAAACACGTTGTCTTGATGACTTAGGTCTTGATTCGCTTGACGCTGCTG	115.722	9663.89
NCP_N4288	CTACGCTGATATCTGCACATGTGAGTAACGCAGTTCGTCTTGATTCGCTTGACGCTGCTG	997.274	4260.79
NCP_N4291	CTAATCACACGCTTGCACGTTGGTTCATATCGTTTCGTCTTGATTCGCTTGACGCTGCTG	162.089	6766.59
NCP_N4292	GAAACAATATACACGCGCGTGCGTAGATATATATAGGTCTTGATTCGCTTGACGCTGCTG	477.876	11555.7
NCP_N4305	CTATTCGAAGAGTGCAACGTGTTGAAAGAACCCTTCGTCTTGATTCGCTTGACGCTGCTG	112.446	7896.9
NCP_N4306	CTACCCTTCTCACCCCCCGTGTTACGCAAAGAATTCGTCTTGATTCGCTTGACGCTGCTG	190.144	4964.52
NCP_N4322	GAAAGTGACAACGAGCACGGGTGCACCATATGGTAGGTCTTGATTCGCTTGACGCTGCTG	275.974	4752.65
NCP_N4367	GAATTCAGTCCATTGCGCGTGCAAGAATTTTCCTAGGTCTTGATTCGCTTGACGCTGCTG	227.722	5196.85
NCP_N4375	CTATACTATCAATTAAACGTGCACTAGGTGCTGTTCGTCTTGATTCGCTTGACGCTGCTG	89.5797	7565.6
NCP_N4378	CTAATCAGTGGTAGCAACGTGGTAGCACGGAAGTTCGTCTTGATTCGCTTGACGCTGCTG	85	9483.69
NCP_N4387	GAATATATATTCATGCACATGTGTAACAATGTATAGGTCTTGATTCGCTTGACGCTGCTG	986.712	8500.31
NCP_N4394	CTACCCTCCCCCATGCATGTGGAGTCATAGGAGTTCGTCTTGATTCGCTTGACGCTGCTG	167.091	3563.63
NCP_N4432	GAATGAAAGACGCACCACATGTACATATCACGTTAGGTCTTGATTCGCTTGACGCTGCTG	1562.33	5533.43
NCP_N4442	GAAGACTTTTTATTCCTCGTGGCAAAGAATGGCTAGGTCTTGATTCGCTTGACGCTGCTG	254.743	7014.77
NCP_N4450	GAATATTGCTTGTTCAACGTGAACTGGGTACGTTAGGTCTTGATTCGCTTGACGCTGCTG	100.836	2687.21
NCP_N4463	GAAAAAACATAAAGCAACGTGGAATATGTCACATAGGTCTTGATTCGCTTGACGCTGCTG	115.859	7407.77
NCP_N448	GAATATGTAGTCTACCACATGCTCAAGGTCGATTAGGTCTTGATTCGCTTGACGCTGCTG	267.214	4922.4
NCP_N452	GAAAGTTAAGTACTGCACGTTTCATATCGGAGGTAGGTCTTGATTCGCTTGACGCTGCTG	94.7254	8803.25
NCP_N4524	CTACTAAACCCAGCTCACGTTCCCTATTAGTGGTTCGTCTTGATTCGCTTGACGCTGCTG	243.219	4170.1
NCP_N4532	GAAAAACTCAAAAACCACATGCTTCTCTTGAGTTAGGTCTTGATTCGCTTGACGCTGCTG	165.536	3813.01
NCP_N4565	GAATTTTCAATAACGCACATGGTGGTGTACGGGTAGGTCTTGATTCGCTTGACGCTGCTG	200.5	7282.39
NCP_N4608	CTAGCCTAAAGACACAACGTGTTTGTTAATTATTTCGTCTTGATTCGCTTGACGCTGCTG	285.572	9490.44
NCP_N4610	CTACAGATAGATGGGCACATGGCAAACTTAGCTTTCGTCTTGATTCGCTTGACGCTGCTG	395.17	6106.96
NCP_N4620	CTATTAATGATTACGCATGTGGATGTGTTCAGTTTCGTCTTGATTCGCTTGACGCTGCTG	135.277	4484.63
NCP_N4627	CTATCTCCCCCCTTCCTCGTGCTGCGCGACTGTTTCGTCTTGATTCGCTTGACGCTGCTG	162.996	8309.75
NCP_N4662	CTATAGAATATTAGAAACGTGCATGCCTACAATTTCGTCTTGATTCGCTTGACGCTGCTG	237.039	12182.1
NCP_N4667	GAATCCTTGAAGTAGCACATGCGTTAGGGCTAGTAGGTCTTGATTCGCTTGACGCTGCTG	81.2575	4698.6
NCP_N4668	CTAATTAGCTTTAAGCACATGTATATTGGACATTTCGTCTTGATTCGCTTGACGCTGCTG	114.891	5156.01
NCP_N4681	GAAGCTTTTGTCCTACACGAGGAATGTATCAAATAGGTCTTGATTCGCTTGACGCTGCTG	86.317	3939.21
NCP_N4694	GAAAGTCTTAAATAGCACGAGGAAATTTCCATGTAGGTCTTGATTCGCTTGACGCTGCTG	282.884	6945.69
NCP_N4751	GAAGAACAATTTAGGCACGGGGAAATTCGATCGTAGGTCTTGATTCGCTTGACGCTGCTG	250.642	5250.56
NCP_N4754	CTAAGAAGTGCTTGCCATGTGCTTTGAAAACTTTTCGTCTTGATTCGCTTGACGCTGCTG	367.687	5755.5
NCP_N476	GAATGTCGTTACCCGCACGTTGTGTTTTTTGAGTAGGTCTTGATTCGCTTGACGCTGCTG	157.795	9397.36
NCP_N4765	GAATAAATACTTGAAAACGTGCATGTGATGATGTAGGTCTTGATTCGCTTGACGCTGCTG	15430.8	13598.1
NCP_N4769	CTAAAAAACCCTTTTCGCGTGCCTGTGATGCTTTTCGTCTTGATTCGCTTGACGCTGCTG	153.222	2899.04
NCP_N4801	CTAGTATTTGAATGACACGTTGCCTTCATTCCTTTCGTCTTGATTCGCTTGACGCTGCTG	318.592	8656.14
NCP_N4809	GAACCTTGGGAAACGCACGCGCGAAGGAGGAAATAGGTCTTGATTCGCTTGACGCTGCTG	130.427	6765.41
NCP_N4817	GAACAATTCTAATTAAACGTGCACAGATCTTTTTAGGTCTTGATTCGCTTGACGCTGCTG	213.006	8232.49
NCP_N4866	GAAGACGTTTATGTGCACGTTTACGTTTGTTTTTAGGTCTTGATTCGCTTGACGCTGCTG	307.059	9216.6
NCP_N49	GAAAAAAAAAAAAAACATGTGGTGATGAAAACGTAGGTCTTGATTCGCTTGACGCTGCTG	627.006	6602.64
NCP_N4943	GAATTGTGGTTAATGCACATGTAAAGTTGTGAATAGGTCTTGATTCGCTTGACGCTGCTG	174.83	3407.48
NCP_N4964	CTATCCTTCGAGCACAACGTGGCATTATATATATTCGTCTTGATTCGCTTGACGCTGCTG	225.166	11797.7
NCP_N4974	GAACACTGTCTATTCCTCGTGGACCCTCTTTCGTAGGTCTTGATTCGCTTGACGCTGCTG	138.432	5048.56
NCP_N4978	CTATTAACAATTGATAACGTGCCCTTTATTGAATTCGTCTTGATTCGCTTGACGCTGCTG	2130.6	7117.56
NCP_N501	CTACATCTGTACCACCACATGCTGTGTAGTTATTTCGTCTTGATTCGCTTGACGCTGCTG	153.546	4260.16
NCP_N5028	CTACCACGATAAAAGCACGCGACCGAAAAGGCGTTCGTCTTGATTCGCTTGACGCTGCTG	1010.3	4448.04
NCP_N5029	CTATATAGAAGTGACAACGTGTTTTTTCGTTTTTTCGTCTTGATTCGCTTGACGCTGCTG	216.438	10214.3
NCP_N5032	GAAGTGGCTCACACACATGTGGGCGCTATCCCCTAGGTCTTGATTCGCTTGACGCTGCTG	141.18	5741.62
NCP_N5036	CTATAACTTGACTCGCACATGCCTGCTGGGTCATTCGTCTTGATTCGCTTGACGCTGCTG	106.17	4216.15
NCP_N504	CTATACAAAAGAATCCTCGTGTGTTTGTGTGTGTTCGTCTTGATTCGCTTGACGCTGCTG	144.019	5529.72
NCP_N5056	CTATGGATTGCCAGAAACGTGACGTGAAATACCTTCGTCTTGATTCGCTTGACGCTGCTG	14222.4	6192.04
NCP_N5082	GAATCAAATTCGTCACACGTTTCCAATTTGCAATAGGTCTTGATTCGCTTGACGCTGCTG	316.945	7487.83
NCP_N5089	GAAGGCCTCGTGGCGCACATGGTACGCTGTGGTTAGGTCTTGATTCGCTTGACGCTGCTG	321.177	6995.04
NCP_N5117	GAATTTTGGTAAATCAACGTGCAGAAAAAATAATAGGTCTTGATTCGCTTGACGCTGCTG	362.541	8895.67
NCP_N5125	CTAACTCTTCTATCGCACATGTATGGTTCTTATTTCGTCTTGATTCGCTTGACGCTGCTG	126.342	4664.98
NCP_N5130	GAAATGGATGCTGAACATGTGGAATACCAGTTTTAGGTCTTGATTCGCTTGACGCTGCTG	162.868	4122.77
NCP_N5132	GAATATAATTGACAGCACGAGGAGAAACAAAATTAGGTCTTGATTCGCTTGACGCTGCTG	341.855	8451.51
NCP_N5141	GAATGCATTCACTGCCATGTGCAAATAAAGGCTTAGGTCTTGATTCGCTTGACGCTGCTG	213.21	4308.88
NCP_N5142	CTATTGGCGAATCGCCACATGCCATTTACGTAATTCGTCTTGATTCGCTTGACGCTGCTG	379.123	4956.37
NCP_N5157	CTATCCAGACAAAAGAACGTGCAGGCGCTTGGCTTCGTCTTGATTCGCTTGACGCTGCTG	90.9991	8018.35
NCP_N516	CTACTCTATTGTTAACACGAGGGAAAAGATGGATTCGTCTTGATTCGCTTGACGCTGCTG	262.364	5888.76
NCP_N518	CTATTAGCACCATCGCGCGTGCATCACTGCATGTTCGTCTTGATTCGCTTGACGCTGCTG	79.8665	4649.39
NCP_N5180	GAAACATAAGCAAAGCACATGGGAATAGACAATTAGGTCTTGATTCGCTTGACGCTGCTG	196.457	5677.61
NCP_N5181	GAAGCCCCACGCAAGCATGTGCAGCAACGGACATAGGTCTTGATTCGCTTGACGCTGCTG	171.796	4446.92
NCP_N5190	GAAGATCCTTCTTACCGCGTGCTGGGTGAAAAGTAGGTCTTGATTCGCTTGACGCTGCTG	74.6396	3854.42
NCP_N5222	CTATCCACTTTTTTCAACGTGCAAAAGTTGTCCTTCGTCTTGATTCGCTTGACGCTGCTG	119.264	5003.31
NCP_N5225	GAACTTTGAATTACGCACATGCAGAACTCCTGTTAGGTCTTGATTCGCTTGACGCTGCTG	81.7567	4803.74
NCP_N526	GAAAAAACACAAAGGCACATGGTTGTATAGATCTAGGTCTTGATTCGCTTGACGCTGCTG	329.138	6078.48
NCP_N5266	CTATTGCGCTTGCGGCACATGTAATGTAGTTTCTTCGTCTTGATTCGCTTGACGCTGCTG	145.781	3203.75
NCP_N5277	GAAGATGCACAATGGCACATGCAGTTGGGTGCATAGGTCTTGATTCGCTTGACGCTGCTG	79.462	3651.3
NCP_N5286	CTAGTGGCTCACACACATGTGGGCGCTATCCCCTTCGTCTTGATTCGCTTGACGCTGCTG	183.971	6376.59
NCP_N5304	CTAATATAGGGAATGCATGTGCACAATTGGTTTTTCGTCTTGATTCGCTTGACGCTGCTG	251.966	5206.37
NCP_N5321	CTAAGACCGAATGAACATGTGCCTTTGCATTACTTCGTCTTGATTCGCTTGACGCTGCTG	435.876	5636.7
NCP_N5345	CTATTTAAATCGTGACATGTGCTTTAATAGAAATTCGTCTTGATTCGCTTGACGCTGCTG	5720.89	8114.83
NCP_N5346	GAAAAAAATTTTCGCCTCGTGGCCCGAAACACGTAGGTCTTGATTCGCTTGACGCTGCTG	273.683	8967.16
NCP_N5349	GAACTAACTGAAAGGCATGTGGGTTTGTGTGTGTAGGTCTTGATTCGCTTGACGCTGCTG	140.632	5893.87
NCP_N5352	GAATACGACTCCCTGCACATGGTTGCTATTTTTTAGGTCTTGATTCGCTTGACGCTGCTG	459.282	5568.83
NCP_N5361	CTATAGAAGGAAAAGCACATGGTACCCAGGCAGTTCGTCTTGATTCGCTTGACGCTGCTG	186.388	5721.98
NCP_N5397	GAATTGAAAGGGCATAACGTGCAGACAAAAACATAGGTCTTGATTCGCTTGACGCTGCTG	337.252	5054.89
NCP_N5411	GAAATACCACTCAAGAACGTGCATAGATCCGCATAGGTCTTGATTCGCTTGACGCTGCTG	153.375	10067.2
NCP_N542	GAAATGTTTGGTTAGCACATGTGTAACTACTGCTAGGTCTTGATTCGCTTGACGCTGCTG	300.796	7820.19
NCP_N5421	GAACCCTCAACTTAGCATGTGCTGATTACACTATAGGTCTTGATTCGCTTGACGCTGCTG	345.054	5311.05
NCP_N5428	GAAAAAAAAAAACTACATGTGCTCATGAATATATAGGTCTTGATTCGCTTGACGCTGCTG	1749.12	5459.43
NCP_N5430	GAAGAACGTAGTATCCACATGCCATCCTCCTTGTAGGTCTTGATTCGCTTGACGCTGCTG	179.866	3844.83
NCP_N5434	GAATTCCAAGTCTCACACGAGGCCTTTGTATTTTAGGTCTTGATTCGCTTGACGCTGCTG	86.4416	4149.5
NCP_N5438	CTAAAAGGGAAAAGCCACATGCGGAAGAATTTTTTCGTCTTGATTCGCTTGACGCTGCTG	571.247	5514.37
NCP_N5441	GAAAGTTTATTATTCAACGTGTCCAATTTTCACTAGGTCTTGATTCGCTTGACGCTGCTG	113.638	6558.38
NCP_N546	CTAATTTTAGTTAAGCACATGCATACATAAATTTTCGTCTTGATTCGCTTGACGCTGCTG	492.807	7443.22
NCP_N5466	CTATACAAGCTTTGGCACATGTTCGTGATACCTTTCGTCTTGATTCGCTTGACGCTGCTG	672.875	6069.8
NCP_N5471	GAATACGCACAAATGCACATGTATACATACGCATAGGTCTTGATTCGCTTGACGCTGCTG	137.619	4245.62
NCP_N5492	GAACTGCACTTCTGGCACATGGTCTAGCCTTTCTAGGTCTTGATTCGCTTGACGCTGCTG	318.17	4830.35
NCP_N550	GAATACAGTTAGCTGCACATGTTTCTCGAATAGTAGGTCTTGATTCGCTTGACGCTGCTG	324.784	6070.59
NCP_N5540	CTAAAGAAAATTCAGCACATGCCAGATGGCGAGTTCGTCTTGATTCGCTTGACGCTGCTG	223.856	4291.61
NCP_N5542	CTAACTTTTGAAGAGCACATGTAATATTTGCTCTTCGTCTTGATTCGCTTGACGCTGCTG	288.331	4255.46
NCP_N556	CTACGCTGTTTTCCGCACGAGGTTTCTCCGGACTTCGTCTTGATTCGCTTGACGCTGCTG	221.218	5810.16
NCP_N5566	CTAAGCGGCTGGCAGCATGTGCATGATAATGATTTCGTCTTGATTCGCTTGACGCTGCTG	201.226	5298.48
NCP_N557	CTAAACTTGTACTTGCACATGTATCTTATTGTTTTCGTCTTGATTCGCTTGACGCTGCTG	382.531	4419.1
NCP_N5590	CTAAGTTTCATTAGGAACGTGAGCAGAAAAATATTCGTCTTGATTCGCTTGACGCTGCTG	1236.06	6808.06
NCP_N5596	GAAAATAGACGTAGCCACATGCAGCCTTTAATATAGGTCTTGATTCGCTTGACGCTGCTG	169.518	3988.88
NCP_N56	CTAAAAAGTTCCCCCCTCGTGGCCAGCGACGTTTTCGTCTTGATTCGCTTGACGCTGCTG	73.1191	6261.27
NCP_N5614	GAACCCTTTTTGGTGCACGTTCGCTCGGCGAGTTAGGTCTTGATTCGCTTGACGCTGCTG	107.007	7746.69
NCP_N5621	GAATACATCGACAAACATGTGCAACAGCTCTAATAGGTCTTGATTCGCTTGACGCTGCTG	121.751	5052.9
NCP_N5626	CTATCAAGAAGCCCGCATGTGCTACTTACGTTTTTCGTCTTGATTCGCTTGACGCTGCTG	158.798	5518.8
NCP_N5641	GAAAAACGATCCGACAACGTGCATGGTAATTCATAGGTCTTGATTCGCTTGACGCTGCTG	574.267	14135
NCP_N5653	CTACTTGAAAATTGGCACGTTTTCTTCTTGTTTTTCGTCTTGATTCGCTTGACGCTGCTG	460.384	14135
NCP_N5656	CTATACGGACATAAGAACGTGCCGCCCATTCTGTTCGTCTTGATTCGCTTGACGCTGCTG	155.334	11535.3
NCP_N566	GAATCTGAGTTTTCGCACGTTGCACGAGTCGCATAGGTCTTGATTCGCTTGACGCTGCTG	347.253	7986.18
NCP_N5664	GAAGCAGTAATTGTGCACATGCAGTTTTTGTTTTAGGTCTTGATTCGCTTGACGCTGCTG	283.019	4959.84
NCP_N567	GAAAATTTGTTGTTACACGAGGAGTATTAAAAATAGGTCTTGATTCGCTTGACGCTGCTG	137.242	5246.91
NCP_N5674	GAAGCTTTTGTAGAACATGTGGCTGTTTCTGTATAGGTCTTGATTCGCTTGACGCTGCTG	589.636	6144.74
NCP_N5703	CTACGGGTACCCTCCCTCGTGCTATTATATTACTTCGTCTTGATTCGCTTGACGCTGCTG	685.129	8266.2
NCP_N5721	CTACTATAGACGCCGCACATGCTTTCAAATAGATTCGTCTTGATTCGCTTGACGCTGCTG	278.28	5989.1
NCP_N573	GAACCTGCTATGCTCCACATGTTAAAGGGAAAATAGGTCTTGATTCGCTTGACGCTGCTG	136.035	3701.68
NCP_N5743	GAACGGGGTCCGGGTAACGTGCTTGCGCGCGGATAGGTCTTGATTCGCTTGACGCTGCTG	304.569	4060
NCP_N578	CTACTCATGCTTTGGCGCGTGCGCATCTATATATTCGTCTTGATTCGCTTGACGCTGCTG	212.11	7229.18
NCP_N5803	GAATTATACGGTACACATGTGGAGAAACAATTTTAGGTCTTGATTCGCTTGACGCTGCTG	343.298	6051.73
NCP_N5832	GAACTTCTAGTCGAGCACATGGTCAAAATAGTCTAGGTCTTGATTCGCTTGACGCTGCTG	1960.42	8202.67
NCP_N5835	GAAAAAAAATAAAAGCATGTGCGAACTCTAGTTTAGGTCTTGATTCGCTTGACGCTGCTG	221.482	6552.19
NCP_N5853	GAAAAAATTGACCTGCACATGGAGAAAGCGTAATAGGTCTTGATTCGCTTGACGCTGCTG	113.931	4067.4
NCP_N5864	CTATCATGAGAAGCGCACATGTCGTGATATCAATTCGTCTTGATTCGCTTGACGCTGCTG	752.817	7541.77
NCP_N5896	CTACAATAACATATGCACATGGCAACGGGTCTTTTCGTCTTGATTCGCTTGACGCTGCTG	221.42	5091.08
NCP_N590	GAAATCCTTGTCAATAACGTGCTTGAGTGCTCATAGGTCTTGATTCGCTTGACGCTGCTG	200.123	4649.81
NCP_N5915	CTAGTTTTTTTAAACCATGTGCGAAGAAATTCTTTCGTCTTGATTCGCTTGACGCTGCTG	1529.68	5991.78
NCP_N5923	GAAGTTTATCCTTTTCACGTTCTAAAAATCAATTAGGTCTTGATTCGCTTGACGCTGCTG	146.338	3257.91
NCP_N5926	GAATAGCCGGTTAAGCACGTTGATATTGTTCTTTAGGTCTTGATTCGCTTGACGCTGCTG	176.373	11019.1
NCP_N593	GAATGGGCATCATAGCATGTGGTACTAAACCCTTAGGTCTTGATTCGCTTGACGCTGCTG	142.715	4918.89
NCP_N5940	CTAAATAATCTAAGACACGTTGCATTATACATGTTCGTCTTGATTCGCTTGACGCTGCTG	146.612	8333.66
NCP_N5950	GAAGTACGCCTTTTCCGCGTGCGCCGGTCTTTATAGGTCTTGATTCGCTTGACGCTGCTG	130.177	5226.67
NCP_N5995	GAAATAGCTTCCGTGCACGTTCCAGTCTTCCCTTAGGTCTTGATTCGCTTGACGCTGCTG	228.28	8731.73
NCP_N6007	CTAAAGTAATATCATAACGTGTGATGACTACTGTTCGTCTTGATTCGCTTGACGCTGCTG	104.962	3209.69
NCP_N6057	GAACTATTACATTACAACGTGCATATAACAGAATAGGTCTTGATTCGCTTGACGCTGCTG	223.897	10685.6
NCP_N6060	CTACATTCATATTTACATGTGCGTTACTACTTATTCGTCTTGATTCGCTTGACGCTGCTG	145.424	5123.36
NCP_N6087	GAACTAAACGGAAGGCACATGCATCGCATAATTTAGGTCTTGATTCGCTTGACGCTGCTG	185.599	5447.43
NCP_N6116	GAATGGAAAGTGTGGCATGTGCTTCACACAATATAGGTCTTGATTCGCTTGACGCTGCTG	726.747	6273.4
NCP_N612	CTAGTGCTGCCCCGCCACATGCAATCGGGCCGTTTCGTCTTGATTCGCTTGACGCTGCTG	206.8	2647.92
NCP_N6132	GAAGGCACAGGAAACCCCGTGCACTCTGCCACTTAGGTCTTGATTCGCTTGACGCTGCTG	403.099	4347.59
NCP_N6151	GAATCGATGAACAAGCACGTTATTTCTTAAACGTAGGTCTTGATTCGCTTGACGCTGCTG	371.515	5700.21
NCP_N6153	GAATTTTACCCTCTACACGTTGTCACCCCTTTCTAGGTCTTGATTCGCTTGACGCTGCTG	173.371	8703.15
NCP_N6157	CTAATCTTGACTAACAACGTGTACAACTCTTTTTTCGTCTTGATTCGCTTGACGCTGCTG	97.701	8607.27
NCP_N6164	CTACGGAAATCATGACATGTGCTATGGCCTGTGTTCGTCTTGATTCGCTTGACGCTGCTG	346.644	5576.27
NCP_N6178	GAATTGTATGTGAAGCACGTTGCTGCCCCCTTTTAGGTCTTGATTCGCTTGACGCTGCTG	725.906	19012.1
NCP_N6181	CTATGTTAGAAAAGGCATGTGCACTCACAATTCTTCGTCTTGATTCGCTTGACGCTGCTG	227.77	5085.45
NCP_N6208	CTAGTAATGCATAACAACGTGCAATGCAAAGGATTCGTCTTGATTCGCTTGACGCTGCTG	386.57	8348.92
NCP_N6220	GAAGAATACAGTGGGCACATGCCACCTGTTATTTAGGTCTTGATTCGCTTGACGCTGCTG	550.327	6153.39
NCP_N6229	CTATAGGCTAAACGGCACATGTTAACTTTTTTCTTCGTCTTGATTCGCTTGACGCTGCTG	774.377	5257.86
NCP_N6245	CTACAACTTCACGCCCACGTTGAGAGTACATTCTTCGTCTTGATTCGCTTGACGCTGCTG	216.323	8534.07
NCP_N6256	GAACAGAAGGTCTACCACATGTGTTTTGAATATTAGGTCTTGATTCGCTTGACGCTGCTG	292.964	5593.85
NCP_N6262	CTAGGGTAGTTAGTGCACGCGGGGAACTACCTCTTCGTCTTGATTCGCTTGACGCTGCTG	105.658	4968.55
NCP_N6265	CTATGGATCAACAAGCACATGTTTTTCTAATTATTCGTCTTGATTCGCTTGACGCTGCTG	335.204	6358.87
NCP_N6276	GAAACTGCAATAATGCACATGTATCTTTTCAGTTAGGTCTTGATTCGCTTGACGCTGCTG	193.569	4276.23
NCP_N6277	CTACCATTTGTCAAGCACATGCTTAATCCAACATTCGTCTTGATTCGCTTGACGCTGCTG	455.701	6725.51
NCP_N6284	CTAGGCACACTTTAACATGTGCATATATGTGTATTCGTCTTGATTCGCTTGACGCTGCTG	280.107	5414.33
NCP_N63	CTACAGCAATTGCACCACATGCATGTCACATATTTCGTCTTGATTCGCTTGACGCTGCTG	277.81	5400.82
NCP_N6323	GAATAGACGATGACTCGCGTGCCAAATAGAATTTAGGTCTTGATTCGCTTGACGCTGCTG	138.655	3313.93
NCP_N6329	GAAACGATGTTAGCGCACATGCTACATGACTTGTAGGTCTTGATTCGCTTGACGCTGCTG	176.297	5765.69
NCP_N6331	CTATCATGATTACCCAACGTGCCGTTACAAATGTTCGTCTTGATTCGCTTGACGCTGCTG	246.342	10350.1
NCP_N6347	CTAAAATTCCTCCTTCACGTTCTGTTGAAGGGATTCGTCTTGATTCGCTTGACGCTGCTG	103.987	3293.92
NCP_N6355	CTAGAGTGAGGAGAAAACGTGCAGTTAATAAAATTCGTCTTGATTCGCTTGACGCTGCTG	365.551	9979.16
NCP_N6360	GAAAGCTGTTAGTGCCACATGTTTCTATACAAATAGGTCTTGATTCGCTTGACGCTGCTG	380.465	5608.61
NCP_N6377	GAACGTTAAAACCAGAACGTGCACAATTTTTTTTAGGTCTTGATTCGCTTGACGCTGCTG	485.01	12014.6
NCP_N6420	GAACAACAACCAGCTCACGTTGCTGAACAGCCGTAGGTCTTGATTCGCTTGACGCTGCTG	185.629	4435.99
NCP_N644	GAATAGTATGGTGAGCACATGCTTTAAGTCCGATAGGTCTTGATTCGCTTGACGCTGCTG	408.166	6487.59
NCP_N6472	CTAATGACAATTGTACACGTTGAAACGGAATTATTCGTCTTGATTCGCTTGACGCTGCTG	98.5021	5361.16
NCP_N6498	CTAATTGATCAAGGCCACATGCAAAATAGGGAATTCGTCTTGATTCGCTTGACGCTGCTG	285.495	4383.15
NCP_N6562	CTACCCATATGGATGCACGTTGAAAGCACTGTGTTCGTCTTGATTCGCTTGACGCTGCTG	143.286	6173.17
NCP_N6576	CTATAGATCACTTTGCACGCGGGCATTGAATGATTCGTCTTGATTCGCTTGACGCTGCTG	187.967	4646.87
NCP_N6579	CTAGTTCTTTGCGAGCATGTGCTATACAGTCTTTTCGTCTTGATTCGCTTGACGCTGCTG	502.812	6484.15
NCP_N6587	GAATACCCTGCCGGCCACATGCCGAATTAAATTTAGGTCTTGATTCGCTTGACGCTGCTG	149.005	4213.44
NCP_N6594	CTAACTCTGCATCAGCACGCGGGCTCTGGAAGGTTCGTCTTGATTCGCTTGACGCTGCTG	80.7915	4297.77
NCP_N6595	GAACTGACAGCCAACAACGTGCCACTAGCAGGATAGGTCTTGATTCGCTTGACGCTGCTG	155.982	9159.46
NCP_N6602	CTACCACGACTACAACATGTGCAAGTACTATCCTTCGTCTTGATTCGCTTGACGCTGCTG	273.197	5647.15
NCP_N6620	CTATGCCCGAAATCCAACGTGCATTCTATTCTCTTCGTCTTGATTCGCTTGACGCTGCTG	136.374	6265.73
NCP_N6632	GAAATGCTGCACCCTAACGTGCATGTATATATATAGGTCTTGATTCGCTTGACGCTGCTG	60.07	4041.37
NCP_N6633	CTATGAAGGTTTGTACATGTGCGAGTTCATGAGTTCGTCTTGATTCGCTTGACGCTGCTG	157.694	4792.36
NCP_N6639	CTATCCGTAATTAGCCACGAGGCCAGAAAGGAATTCGTCTTGATTCGCTTGACGCTGCTG	254.85	7404.76
NCP_N6658	CTAGTCAGAAAAAGAAACGTGCACCCGCCCGTCTTCGTCTTGATTCGCTTGACGCTGCTG	295.42	10487.8
NCP_N668	GAACCGTGCCTGCACCTCGTGTATCGTGATGCGTAGGTCTTGATTCGCTTGACGCTGCTG	849.116	5153.98
NCP_N6694	CTAGACCAGCTAAAACACGTTGAAAGCAGATATTTCGTCTTGATTCGCTTGACGCTGCTG	77.3166	4849.58
NCP_N6696	CTATGGTTGTACTTCCTCGTGTGTCAGATACTTTTCGTCTTGATTCGCTTGACGCTGCTG	212.213	5091.45
NCP_N67	GAATAAAAAGTGTACCACATGTCATTAAAAGTTTAGGTCTTGATTCGCTTGACGCTGCTG	1171.01	6512.64
NCP_N6724	CTAATTGTCATTTAACACGGGGATGAGCTTCTTTTCGTCTTGATTCGCTTGACGCTGCTG	187.758	3573.78
NCP_N6734	GAATCATCTACCATCCACATGCTTGCTTTACTCTAGGTCTTGATTCGCTTGACGCTGCTG	157.286	4417.1
NCP_N6743	GAAGTCAGGTTGATACATGTGCCTTTTATTCCATAGGTCTTGATTCGCTTGACGCTGCTG	703.139	5806.38
NCP_N6776	CTAGTTCTTCGAAGGCACATGGCGCCCCTATAATTCGTCTTGATTCGCTTGACGCTGCTG	355.208	5624.82
NCP_N6779	GAACGGTCCTGCTCTCACGTTCTTCCTTATTGGTAGGTCTTGATTCGCTTGACGCTGCTG	151.902	4405.39
NCP_N679	CTAGGACAAATGAAGCACATGCAAAGAGTTAACTTCGTCTTGATTCGCTTGACGCTGCTG	291.288	4522.49
NCP_N6798	CTACTACCACAAATGCACGTTTCGCGATTACTGTTCGTCTTGATTCGCTTGACGCTGCTG	191.965	9554.62
NCP_N6818	GAATTGAGCAAAGAGCACGTTGCGAATACGTTTTAGGTCTTGATTCGCTTGACGCTGCTG	215.671	9781.9
NCP_N6823	CTAGCCCCACGCCCCCACGTTGTTGAGGTGTTTTTCGTCTTGATTCGCTTGACGCTGCTG	220.067	12459.5
NCP_N6830	GAATACAACCCCGAACCCGTGCGTGGGCTATTCTAGGTCTTGATTCGCTTGACGCTGCTG	117.251	4807.57
NCP_N6834	CTAAAGCATCAACACCATGTGCATACCATACCGTTCGTCTTGATTCGCTTGACGCTGCTG	178.099	6047.13
NCP_N6837	CTAATTTCAGAGTTGCACGTTGGTATATCCTAATTCGTCTTGATTCGCTTGACGCTGCTG	81.3991	8920.83
NCP_N6843	CTACAAAAGTACAAACACGGGGAAAGAGAGCCATTCGTCTTGATTCGCTTGACGCTGCTG	210.871	3905.21
NCP_N6845	CTACCGCTAATTAGTAACGTGCCGTGATTCTTTTTCGTCTTGATTCGCTTGACGCTGCTG	2501.1	5116.91
NCP_N6852	GAATACCTATTACTGCATGTGGAGAAAAGATTATAGGTCTTGATTCGCTTGACGCTGCTG	135.42	3832.98
NCP_N6879	GAATTTCCCTTCCCTCGCGTGCCATTCGGCGATTAGGTCTTGATTCGCTTGACGCTGCTG	59.9763	3028.07
NCP_N6885	GAACGAATAAATAGCAACGTGAATAAGTAAGTCTAGGTCTTGATTCGCTTGACGCTGCTG	190.56	4787.95
NCP_N6889	GAATTCCTGGATATGCGCGTGCTAACTAGAGCATAGGTCTTGATTCGCTTGACGCTGCTG	107.139	5326.88
NCP_N6896	CTATAGGGATATCTGCACATGGGGCCTCGAGCATTCGTCTTGATTCGCTTGACGCTGCTG	76.1411	5393.08
NCP_N6918	GAATTAATGGCAGTGCACATGTTTAAGGACGTTTAGGTCTTGATTCGCTTGACGCTGCTG	397.565	5560.56
NCP_N6925	GAATGTTTTTCTTCGCACATGGCTGGTTCTGCTTAGGTCTTGATTCGCTTGACGCTGCTG	365.141	4400.86
NCP_N6969	GAAACAACTTTGTCACACGTTCTAAAAATAAAATAGGTCTTGATTCGCTTGACGCTGCTG	265.876	8503.06
NCP_N6974	CTATACTCACTTTCGCACATGCGATTACGTGTATTCGTCTTGATTCGCTTGACGCTGCTG	112.821	4737.55
NCP_N6975	GAAATCGGTACATCACCCGTGCCAAAATATGTGTAGGTCTTGATTCGCTTGACGCTGCTG	280.137	4358.82
NCP_N6976	GAACTTTATTTATTGAACGTGTGATTCCCCTGATAGGTCTTGATTCGCTTGACGCTGCTG	336.026	4563.21
NCP_N6979	CTACGTATATCACATCACGTTTACGCGTATGGTTTCGTCTTGATTCGCTTGACGCTGCTG	5486.5	5431.51
NCP_N698	CTATTTGGCTCAGCAAACGTGCAGCACCATGATTTCGTCTTGATTCGCTTGACGCTGCTG	77.9944	6164.52
NCP_N6983	CTACTGTGATTGGCGCACGGGTGTGGAGGTGTCTTCGTCTTGATTCGCTTGACGCTGCTG	194.122	4542.24
NCP_N6997	CTATAGTTTTGTCTCAACGTGTATTTTATCGGTTTCGTCTTGATTCGCTTGACGCTGCTG	272.163	6016.02
NCP_N7007	GAATTTCTACGTAACCACGTTGTTTACGTACTATAGGTCTTGATTCGCTTGACGCTGCTG	318.181	11187.9
NCP_N7015	GAATGTAATCAATTGCATGTGCCAAGGATGATCTAGGTCTTGATTCGCTTGACGCTGCTG	196.659	4392.74
NCP_N7018	CTATGATAAATTCACCACATGTATCTATATATGTTCGTCTTGATTCGCTTGACGCTGCTG	299.214	4965.57
NCP_N7027	CTATGAGGAATTGACAACGTGTTTGTATAAGATTTCGTCTTGATTCGCTTGACGCTGCTG	201.518	11434.3
NCP_N7040	GAAGGTAAATATGGTAACGTGCGACAATAAACATAGGTCTTGATTCGCTTGACGCTGCTG	1767.78	5680.87
NCP_N7048	GAATATATATTAATGCACATGGCTCTGTTGTATTAGGTCTTGATTCGCTTGACGCTGCTG	221.215	5606.52
NCP_N7063	CTACAAATAATTAAGCATGTGGAAAAAGAAGGGTTCGTCTTGATTCGCTTGACGCTGCTG	247.613	4511.84
NCP_N7073	GAATGCAATGTTCTGCACGTTATTTACTTCGATTAGGTCTTGATTCGCTTGACGCTGCTG	212.97	5278.07
NCP_N7104	CTAAATTTCGCTAAACACGGGGTTTAAGTTTAATTCGTCTTGATTCGCTTGACGCTGCTG	728.868	4296.95
NCP_N7115	GAATAGAGATTTTTGCACGAGGATTATTGCCGTTAGGTCTTGATTCGCTTGACGCTGCTG	261.409	5272.85
NCP_N7117	CTAATGTTTCACCGGCACGTTTTGTTTTGTCCCTTCGTCTTGATTCGCTTGACGCTGCTG	367.307	12372.6
NCP_N7118	CTATGCCACTGCCTGCACATGCATTGATACTGCTTCGTCTTGATTCGCTTGACGCTGCTG	155.882	4076.98
NCP_N7128	CTATGAATATACTGCAACGTGCCTATTGAATCCTTCGTCTTGATTCGCTTGACGCTGCTG	382.458	12707.2
NCP_N715	GAATCGTAAGTTGTGCGCGTGCACATTTCGCCCTAGGTCTTGATTCGCTTGACGCTGCTG	360.909	7248.76
NCP_N7206	GAAAAAATGCGGCTGCACGTTGCTTATTACGTGTAGGTCTTGATTCGCTTGACGCTGCTG	266.205	10199
NCP_N7208	CTAATCCATTTTTAAAACGTGTGACTGTTTTCCTTCGTCTTGATTCGCTTGACGCTGCTG	404.763	7049.49
NCP_N7217	GAATTAAATACTAACAACGTGCCAAATAACAGCTAGGTCTTGATTCGCTTGACGCTGCTG	1357.11	10961.4
NCP_N7231	GAAACAATATTTATACATGTGCGTTAAATACTTTAGGTCTTGATTCGCTTGACGCTGCTG	359.809	6821.91
NCP_N7233	GAAGCAAACGAGAAAAACGTGCCAACCTGGCATTAGGTCTTGATTCGCTTGACGCTGCTG	223.806	13775
NCP_N7258	GAACAGTTACTAGCGCACGAGACAAGGCAAAGCTAGGTCTTGATTCGCTTGACGCTGCTG	194.904	3979.98
NCP_N7271	GAATGAGATTTAATGCACGTTATGTTTCGTTCTTAGGTCTTGATTCGCTTGACGCTGCTG	222.709	4989.54
NCP_N7282	CTACGCCATGTCCAACACGTTGCTGGCCGCAAATTCGTCTTGATTCGCTTGACGCTGCTG	174.41	6362
NCP_N7297	GAATATCAGTTACCCCGCGTGCCACCTTCAGTTTAGGTCTTGATTCGCTTGACGCTGCTG	162.285	5828.67
NCP_N7299	CTATCTAACGCAACGCACGAGGCGGCTCACTCATTCGTCTTGATTCGCTTGACGCTGCTG	117.607	6105.72
NCP_N7308	GAAAAGATGTATGCACCCGTGCCCCCGCTGTAGTAGGTCTTGATTCGCTTGACGCTGCTG	200.672	5099.52
NCP_N731	CTAAAAGTCATCTGGCACGTTTAATTATCAGAGTTCGTCTTGATTCGCTTGACGCTGCTG	242.124	7951.28
NCP_N7313	CTATAGGTTCACATCCATGTGCACTGGTGCTGCTTCGTCTTGATTCGCTTGACGCTGCTG	151.63	4139.65
NCP_N7332	CTACCGATGGAATAGCACATGGTGATGGTACAATTCGTCTTGATTCGCTTGACGCTGCTG	183.486	5900.16
NCP_N7338	GAATGAGTTACACCCCGCGTGCTAAAAAAGGGGTAGGTCTTGATTCGCTTGACGCTGCTG	187.627	6154.33
NCP_N7343	CTAGAATTCCTTTGTAACGTGCAAAGCATTTTATTCGTCTTGATTCGCTTGACGCTGCTG	267.603	5088.96
NCP_N737	GAAAATTGGCACTTCAACGTGTATGGAAGTTGCTAGGTCTTGATTCGCTTGACGCTGCTG	56.9882	4539.09
NCP_N7370	GAACTGATGCGATTCCTCGTGTACCATGATCTGTAGGTCTTGATTCGCTTGACGCTGCTG	126.474	3976.01
NCP_N7377	CTACGAATTCCCGAGCACATGGAGTCGCTGAACTTCGTCTTGATTCGCTTGACGCTGCTG	151.63	3571.47
NCP_N7406	CTAACAAACAAAGGCAACGTGCAGTAAACAACCTTCGTCTTGATTCGCTTGACGCTGCTG	308.921	12100.9
NCP_N7411	CTAGTTCATAACTGGCACATGCTTTTCTTCCTTTTCGTCTTGATTCGCTTGACGCTGCTG	529.095	4912.52
NCP_N7442	CTATGTGTCATTTTGCACGTTACATCGGTTTGCTTCGTCTTGATTCGCTTGACGCTGCTG	107.674	3555.47
NCP_N745	CTACTTCCTCTTCTGCACGTTTCTCTAGTAATGTTCGTCTTGATTCGCTTGACGCTGCTG	141.278	11648.1
NCP_N7468	CTACATCTTTAAAGGCACGCGATGTACTGTCTTTTCGTCTTGATTCGCTTGACGCTGCTG	165.963	4844.5
NCP_N7496	CTATTTCCTAATGGGCACGCGACATACGTTTCATTCGTCTTGATTCGCTTGACGCTGCTG	510.37	4363.55
NCP_N7513	CTACCTTTGCGTGTGCACGTTTGTTTACTTTCTTTCGTCTTGATTCGCTTGACGCTGCTG	460.692	9098.35
NCP_N755	GAAAGCGTCAAGAATAACGTGCATTTAATTTTTTAGGTCTTGATTCGCTTGACGCTGCTG	448.552	4348.66
NCP_N756	CTATTTTTACGAGGGCACGTTATAACGTTGGACTTCGTCTTGATTCGCTTGACGCTGCTG	278.771	6038.72
NCP_N822	GAATAACAAGAGGCGCACATGCCTTTTGACTCATAGGTCTTGATTCGCTTGACGCTGCTG	174.945	5085.18
NCP_N842	GAAATAAGTTCGCAGCATGTGGATTCAAGTCCATAGGTCTTGATTCGCTTGACGCTGCTG	51.0105	4129.35
NCP_N852	GAATAAACTTCCTACCCCGTGTTATTAAGATCATAGGTCTTGATTCGCTTGACGCTGCTG	403.077	3957.06
NCP_N867	GAATCAATTGATTACCACATGCAACCCCATTGATAGGTCTTGATTCGCTTGACGCTGCTG	247.571	4558.63
NCP_N875	CTAAAAAAAGCAGGGCACATGTCAAACTCTTGGTTCGTCTTGATTCGCTTGACGCTGCTG	561.606	6664.47
NCP_N883	CTAGGTGAGCAAACGCATGTGGAAATGAACAACTTCGTCTTGATTCGCTTGACGCTGCTG	55.7692	3259.76
NCP_N900	CTAGTTAATAACTACCATGTGCATGCTACAAAGTTCGTCTTGATTCGCTTGACGCTGCTG	433.462	6337.02
NCP_N909	GAAAATTTTTGAGCCCACATGCTTTCGAATGAGTAGGTCTTGATTCGCTTGACGCTGCTG	179.77	6091.67
NCP_N915	GAATGTAAATGTAAACACGAGGCAAACTTCTCCTAGGTCTTGATTCGCTTGACGCTGCTG	252.694	6778.08
NCP_N947	GAATGGGTCCTAATGCATGTGGTGCATGGGTCCTAGGTCTTGATTCGCTTGACGCTGCTG	97.3669	3482.46
NCP_N960	CTATGCACATGGACGCACGTTGTGTGTTCATATTTCGTCTTGATTCGCTTGACGCTGCTG	294.156	10434
NCP_N972	CTACAGATGTCAGACAACGTGCAGCATCTTTTTTTCGTCTTGATTCGCTTGACGCTGCTG	164.63	12742.7
NCP_N976	CTATAGCAAATGTACAACGTGTGAAAGTAAAGATTCGTCTTGATTCGCTTGACGCTGCTG	430.44	8022.63
NCP_N982	CTACAAATAAAGTTGCATGTGGATTATTATGTTTTCGTCTTGATTCGCTTGACGCTGCTG	234.247	4479.78
NCTY_D1233	CTATGAAATTTGTTTCTCGTGACATTAATGATCTTCGTCTTGATTCGCTTGACGCTGCTG	5285.51	1797.47
NCTY_D1416	CTAGTGGGCATAGATCACGCTTCAGCCGCTCTGTTCGTCTTGATTCGCTTGACGCTGCTG	291.326	1354.67
NCTY_D1451	GAATAATACCCCAGTCACGAAAGGTGTGCTGCTTAGGTCTTGATTCGCTTGACGCTGCTG	146.137	2499.29
NCTY_D1631	CTAGGTCTTCTTCATCACGCCCATATTCATTGTTTCGTCTTGATTCGCTTGACGCTGCTG	135.356	2365.26
NCTY_D2092	GAATTCACTGTACATCACGGGTCCGCCTGGCACTAGGTCTTGATTCGCTTGACGCTGCTG	838.977	1992.31
NCTY_D2217	GAATAAGGATTGGATCAGGTGCTTACAAATTTTTAGGTCTTGATTCGCTTGACGCTGCTG	5486.67	1896.94
NCTY_D2379	GAAAGAAAAAAAGATCACGCGACTCTTGCCGGATAGGTCTTGATTCGCTTGACGCTGCTG	13960.3	2842.74
NCTY_D2460	CTATACCGTTCACGCCACCTGACATTATACCACTTCGTCTTGATTCGCTTGACGCTGCTG	2397.59	1867.24
NCTY_D2553	CTACCTTACGACAATTGCGTGACAAATATCACCTTCGTCTTGATTCGCTTGACGCTGCTG	241.072	1720.58
NCTY_D2631	GAAAATTGCATGATTCAGCTGACTGCATATGTGTAGGTCTTGATTCGCTTGACGCTGCTG	552.504	1973.73
NCTY_D266	CTACTGCTGCAGAATTACGTGACATTTCTCAGTTTCGTCTTGATTCGCTTGACGCTGCTG	129.18	1708.36
NCTY_D2784	GAACGAATTGTATATCACGAGAGGTGATGGCACTAGGTCTTGATTCGCTTGACGCTGCTG	1665.01	1810.91
NCTY_D3212	CTATTTCCTTTTTGCCTCGTGATGTTCAAGAAGTTCGTCTTGATTCGCTTGACGCTGCTG	3260.87	3741.82
NCTY_D3375	GAATCTGTGAGGCAACTCGTGATTTCGAAACAATAGGTCTTGATTCGCTTGACGCTGCTG	4544.31	2150.65
NCTY_D3534	GAACGCGGAGAATGCCACATGAGTTTGATGATTTAGGTCTTGATTCGCTTGACGCTGCTG	177.08	1859.39
NCTY_D3594	GAAACTACTTTGTATCACGCTTGTGCTAACATCTAGGTCTTGATTCGCTTGACGCTGCTG	272.383	2491.06
NCTY_D3760	GAAAGTTGTTCCGCTCACGCGAACAGGTTTTTCTAGGTCTTGATTCGCTTGACGCTGCTG	135.527	1481.2
NCTY_D3787	CTAAATCATTCGTGCCTCGTGATATTGAGAAGATTCGTCTTGATTCGCTTGACGCTGCTG	4559.53	3970.37
NCTY_D3849	CTACAAAAATGTTAACATGTGACATTCACGTCATTCGTCTTGATTCGCTTGACGCTGCTG	21882.7	4727.97
NCTY_D4485	GAAAGCACGTGACCCACGCTTGGCCCGCTATGATAGGTCTTGATTCGCTTGACGCTGCTG	26084.1	19013.1
NCTY_D4550	CTAGCTTCTCTAAACCACCTGATGCTTCTATCTTTCGTCTTGATTCGCTTGACGCTGCTG	971.489	1444.5
NCTY_D4560	GAACTAGTGTCGTTGTGCGTGATTTTTCACTTTTAGGTCTTGATTCGCTTGACGCTGCTG	91.8834	2224.24
NCTY_D4648	GAATGAATAAATAAAATCGTGACTAATACGTCCTAGGTCTTGATTCGCTTGACGCTGCTG	936.133	1788.61
NCTY_D468	CTAAAAGCGGCCAATCACGCCCGAAGACGGGACTTCGTCTTGATTCGCTTGACGCTGCTG	40.8594	1057.36
NCTY_D4737	CTATTTGCAACACGATGCGTGACGGTAATGCTTTTCGTCTTGATTCGCTTGACGCTGCTG	212.828	4317.59
NCTY_D4951	CTAAACGGCTATTATCACGCTATGGAAGAACCCTTCGTCTTGATTCGCTTGACGCTGCTG	117.637	1613.46
NCTY_D5067	CTAATTGGCATTACTCAGCTGATACTTATTAATTTCGTCTTGATTCGCTTGACGCTGCTG	290.577	1567.76
NCTY_D515	CTAATGTCAAAAAATCTCGTGAGGCCTCCGGAATTCGTCTTGATTCGCTTGACGCTGCTG	116.877	1464.98
NCTY_D525	CTAACGTCGGAGAGGCAGGTGATCTTCGGCTCGTTCGTCTTGATTCGCTTGACGCTGCTG	739.004	1480.74
NCTY_D5258	CTATGCATTATTCATCATGTGGTCCAAAGCTTTTTCGTCTTGATTCGCTTGACGCTGCTG	7067.44	3116.27
NCTY_D5297	CTACTCAAAGTGTATCACGTCCCCGTCAATTTCTTCGTCTTGATTCGCTTGACGCTGCTG	194.462	2032.93
NCTY_D5419	GAATGCTGTGACTGTCACGCAACATGTCCACCATAGGTCTTGATTCGCTTGACGCTGCTG	144.973	2029.69
NCTY_D5423	GAACGACGATTTCCTCACGAGATGGGATGGTAATAGGTCTTGATTCGCTTGACGCTGCTG	129.174	1821.3
NCTY_D6337	GAAACAAACCGCCGTCACGATGAGGCAGGTGTCTAGGTCTTGATTCGCTTGACGCTGCTG	137.646	1847.09
NCTY_D6345	CTATCCATTTATCATATAAAAAATTTTGGCTTATTCGTCTTGATTCGCTTGACGCTGCTG	70.6278	1118.78
NCTY_D6371	CTAGTAACTCAACATCACGAACGACGTTTATGTTTCGTCTTGATTCGCTTGACGCTGCTG	45.6019	1517.32
NCTY_D6399	GAAATCACTTTCCGTTGCGTGACTATTGATGATTAGGTCTTGATTCGCTTGACGCTGCTG	339.124	1890.95
NCTY_D643	GAATTGTCATGTGAAGGCGTGATAGGTATGTCGTAGGTCTTGATTCGCTTGACGCTGCTG	2658.95	2772.46
NCTY_D6437	CTACAAATGGACTTTAGCGTGACCGTGCTTACCTTCGTCTTGATTCGCTTGACGCTGCTG	224.31	3345.03
NCTY_D6497	CTATCAACAAAATGGGGCGTGATGAAGAAAAAATTCGTCTTGATTCGCTTGACGCTGCTG	659.29	2773.62
NCTY_D6515	GAAGGCGTTCATCATCACGCCAACATATTTCTTTAGGTCTTGATTCGCTTGACGCTGCTG	94.5205	1158.36
NCTY_D6596	CTAATCCATTGGAATCACGCCCTAGTTCAGCAATTCGTCTTGATTCGCTTGACGCTGCTG	209.637	1809.16
NCTY_D6626	CTATGTCTTACAAAGCTCGTGATATTAGTATGCTTCGTCTTGATTCGCTTGACGCTGCTG	1320.37	2411.53
NCTY_D691	GAACCTAGACATTATCACGCAGCCCAAGTCTCTTAGGTCTTGATTCGCTTGACGCTGCTG	59.0671	1389.69
NCTY_D6931	GAAGGTGGGAACCACAGCGTGATGCTGACAAATTAGGTCTTGATTCGCTTGACGCTGCTG	268.143	1696.69
NCTY_D7187	GAATTCTCTTGAGGTCACATGATCGCAAAATGGTAGGTCTTGATTCGCTTGACGCTGCTG	55292.6	2504.25
NCTY_D7230	GAATGCTGCTTGTTTCAGGTGATGTGAACAACGTAGGTCTTGATTCGCTTGACGCTGCTG	171.784	1301.83
NCTY_D7314	GAAGCGGACCAAGATCACGTACCATGTGCAGAATAGGTCTTGATTCGCTTGACGCTGCTG	1632.41	4458.94
NCTY_D798	CTAACTATATAAAGTCACGTTAGAATGCAATTTTTCGTCTTGATTCGCTTGACGCTGCTG	10574.6	2152.28
NCTY_D836	CTATACTGCCTTTATCATGTGACTGAACTACGCTTCGTCTTGATTCGCTTGACGCTGCTG	19099.1	2441.85
NCTY_D841	GAAGAATACTGACATCAGCTGATTTCTCATAGATAGGTCTTGATTCGCTTGACGCTGCTG	4128.14	1442.47
NCTY_D9	CTAGTCCATCACGGTCACATGGTGCAGTACTTCTTCGTCTTGATTCGCTTGACGCTGCTG	17302.3	3989.82
NCTY_D91	GAACCAGACAAGAGTCAGGTGACGCTGCAGATGTAGGTCTTGATTCGCTTGACGCTGCTG	25036.9	1479.79
NCTY_D926	CTATTAGGTGTGGGTCACCTGAATTTATTATTCTTCGTCTTGATTCGCTTGACGCTGCTG	2500.86	1894.75
NCTY_D957	CTAATTTGCCCTCATTACGTGATAACACCACTCTTCGTCTTGATTCGCTTGACGCTGCTG	175.088	1740.46
NCTY_D979	CTAGTTGTTATTATTATCGTGATTATTATTTAGTTCGTCTTGATTCGCTTGACGCTGCTG	348.596	1727.91
NCTY_N10	CTAAAGGACCCCCATATCGTGATAATCATTGATTTCGTCTTGATTCGCTTGACGCTGCTG	102.099	1487.64
NCTY_N101	GAAGATGAATAAAATCATGTGAGTATAATTTTCTAGGTCTTGATTCGCTTGACGCTGCTG	8532.5	2109.94
NCTY_N1015	GAAGAGTCAATGAGTGGTGTGACCCCAATACCATAGGTCTTGATTCGCTTGACGCTGCTG	963.599	1815.01
NCTY_N1025	CTACTCCACTTCCATCACGCAATCGTTAGTGCTTTCGTCTTGATTCGCTTGACGCTGCTG	109.356	1802.92
NCTY_N1030	CTAATCAGTTCGTTTCGCGTGATAACAAACAGTTTCGTCTTGATTCGCTTGACGCTGCTG	304.174	1983.22
NCTY_N1035	CTATTTTTTAAATCTCACGTTATTTTTCATTTATTCGTCTTGATTCGCTTGACGCTGCTG	512.923	2003.28
NCTY_N1047	CTAAAATTTTATGTTTGCGTGATTGTTGGTGATTTCGTCTTGATTCGCTTGACGCTGCTG	121.324	1913.85
NCTY_N105	GAATGCTGTATTATTATCGTGATTTCTCGATTATAGGTCTTGATTCGCTTGACGCTGCTG	138.149	1322.35
NCTY_N1072	CTATTACTCCAAGGGTTCGTGACGTCGAATTCCTTCGTCTTGATTCGCTTGACGCTGCTG	262.509	1359.48
NCTY_N1074	CTAATCTATCTAAAAAGCGTGATTTTTCCCACGTTCGTCTTGATTCGCTTGACGCTGCTG	404.969	4760.27
NCTY_N1095	GAATTAAGGTTGTCTGTCGTGATTAACGGAGCCTAGGTCTTGATTCGCTTGACGCTGCTG	94.0823	1543.53
NCTY_N1100	CTAGTGGCTTAGCATCTCGTGAGGATATGGAAGTTCGTCTTGATTCGCTTGACGCTGCTG	164.017	1822.95
NCTY_N1131	GAATCATTCACTGTTCAGCTGATACAAAACATATAGGTCTTGATTCGCTTGACGCTGCTG	312.769	1593.31
NCTY_N1136	GAAATAGCTGAGCATCATGTGAGTAAACGAGTATAGGTCTTGATTCGCTTGACGCTGCTG	1442.7	1912.33
NCTY_N1159	GAAACCTTATCCGCTCACGCGCGTATTACTTCCTAGGTCTTGATTCGCTTGACGCTGCTG	196.321	3049.87
NCTY_N117	CTATTTGTTTTCCTTCACATGATGAAGAAGGTTTTCGTCTTGATTCGCTTGACGCTGCTG	1074.22	2183.88
NCTY_N1174	GAACTAGAATTAAATCACGCGAAGATCATTAAATAGGTCTTGATTCGCTTGACGCTGCTG	549.66	2262.08
NCTY_N1178	CTAGACAGCCAGTGTCACGCAGACAAATAACATTTCGTCTTGATTCGCTTGACGCTGCTG	279.476	1845.85
NCTY_N1189	GAATCTCTTCTGAGTCACGAAATCAACAGTAATTAGGTCTTGATTCGCTTGACGCTGCTG	165.209	1176.69
NCTY_N1194	GAAAATGAACACTCTCATGTGATTAAAATGTATTAGGTCTTGATTCGCTTGACGCTGCTG	6867.63	2025.95
NCTY_N1218	CTAGCTAACGATCAACACCTGACCGAGATAACATTCGTCTTGATTCGCTTGACGCTGCTG	3843.49	1750.88
NCTY_N1236	GAAATCTTTTTTTTTTGCGTGATCTTTATCAATTAGGTCTTGATTCGCTTGACGCTGCTG	274.781	1947.7
NCTY_N1240	CTAAGCGGCTGTCGTCACGCACCATGGGTACCATTCGTCTTGATTCGCTTGACGCTGCTG	261.602	2115.72
NCTY_N1249	GAATTATACATCTGTCACGTAAACCATTGAAAATAGGTCTTGATTCGCTTGACGCTGCTG	141.032	2042.86
NCTY_N1295	CTACGTTGCCCTAGTCACGCTGGTTACATAAATTTCGTCTTGATTCGCTTGACGCTGCTG	775.241	1734.74
NCTY_N1333	CTATATCCTCATCGTAACGTGAATTTTTTTGTCTTCGTCTTGATTCGCTTGACGCTGCTG	38.6349	1717.4
NCTY_N1349	GAAAGATTAACTGACTACGTGATTTTTTAACTGTAGGTCTTGATTCGCTTGACGCTGCTG	273.408	1971.52
NCTY_N1356	CTAACGACTTCTTATCACGTATAGGAGTGATATTTCGTCTTGATTCGCTTGACGCTGCTG	128.776	1867.78
NCTY_N1357	CTAGTGGCTTCTTGTCACGCCATACGTTACGCGTTCGTCTTGATTCGCTTGACGCTGCTG	710.599	1906.47
NCTY_N1375	CTATTCTACGTTAAAATCGTGATTACTTTACGATTCGTCTTGATTCGCTTGACGCTGCTG	125.878	1521.36
NCTY_N1379	GAACGGAAAAAAAAGCACGTCACGAAAATAAAATAGGTCTTGATTCGCTTGACGCTGCTG	246.748	2614.14
NCTY_N1402	GAACTTCTTTGTTGTCACGCTTTTGTTATTTCCTAGGTCTTGATTCGCTTGACGCTGCTG	4067.09	2752.92
NCTY_N1417	CTATTATATGGTAAATACGTGACAGTGTTCTACTTCGTCTTGATTCGCTTGACGCTGCTG	196.126	2185.52
NCTY_N1434	CTAGTACATCTAATTTACGTGACCTAGACGTTGTTCGTCTTGATTCGCTTGACGCTGCTG	382.476	1671.77
NCTY_N1461	GAACGAGTTGTATGTCTCGTGATTCAGGTACTATAGGTCTTGATTCGCTTGACGCTGCTG	4941.31	2019.95
NCTY_N1478	CTAACCACCTCTTGTCACATGACCATTTTTGTTTTCGTCTTGATTCGCTTGACGCTGCTG	44076	3183.57
NCTY_N1489	GAATGCTTAATAATTAGCGTGATTTCAATGGAATAGGTCTTGATTCGCTTGACGCTGCTG	138.396	1503.53
NCTY_N1494	GAAGCAGTAAACGATCACGCAACTACTCCATTTTAGGTCTTGATTCGCTTGACGCTGCTG	216.298	1683.67
NCTY_N1504	CTAAATTTGGAACAGTTCGTGACTGTTTATTAATTCGTCTTGATTCGCTTGACGCTGCTG	494.372	2046.68
NCTY_N1520	CTAAAAAAGTAAAGTAACGTGAGAATGTCTGATTTCGTCTTGATTCGCTTGACGCTGCTG	331.692	1995.28
NCTY_N1522	GAAAGACATGTGCGTCACGAAAAAAGAAATCAATAGGTCTTGATTCGCTTGACGCTGCTG	373.798	6345.73
NCTY_N1532	GAATGCGATACTTATCACGTACTTTGTATACATTAGGTCTTGATTCGCTTGACGCTGCTG	203.035	2175.75
NCTY_N1550	GAAATATAACAAGCGTACGTGATCCCTTTCATTTAGGTCTTGATTCGCTTGACGCTGCTG	238.014	2312.92
NCTY_N1561	GAATATTATCATTATCACGAGGAACCTCAATGTTAGGTCTTGATTCGCTTGACGCTGCTG	1624.32	3266.04
NCTY_N1576	CTATAGTTTAGTTATGGCGTGACATAATAACGGTTCGTCTTGATTCGCTTGACGCTGCTG	2387.65	2321.92
NCTY_N1579	CTACATATGATGTCCCACATGACGCAAGTAACTTTCGTCTTGATTCGCTTGACGCTGCTG	1172.83	3775.19
NCTY_N158	CTAACAACTAAAAATCACGAAAACAAAATGATATTCGTCTTGATTCGCTTGACGCTGCTG	87.8972	1441.69
NCTY_N1581	CTAATATGCAAATATCACGTAGTTAAAAAACTATTCGTCTTGATTCGCTTGACGCTGCTG	245.699	2546.98
NCTY_N1584	GAATAGTAACGCCGTATCGTGATTAACGTATTATAGGTCTTGATTCGCTTGACGCTGCTG	254.28	2008.39
NCTY_N1599	CTAAATAGGAAATATCACGCTACCTGACAAAAATTCGTCTTGATTCGCTTGACGCTGCTG	751.337	1753.7
NCTY_N16	GAATTCGCCTGCAATCACCTGAACATGTTGGTCTAGGTCTTGATTCGCTTGACGCTGCTG	223.268	1844.07
NCTY_N1607	GAACAAAGTACGAGTCACGACATGTAACAAGGGTAGGTCTTGATTCGCTTGACGCTGCTG	927.105	1943.46
NCTY_N1650	GAACCTAGTGTCGGCCACCTGATAAAGGTTTTTTAGGTCTTGATTCGCTTGACGCTGCTG	227.855	1331.31
NCTY_N1660	GAAGAAGTAAGTAGTCACGCTTATTCTGACGCTTAGGTCTTGATTCGCTTGACGCTGCTG	1128.13	1535.16
NCTY_N1673	CTAAGTAAAAAAAGTCACGCAATAAGCTCTCAATTCGTCTTGATTCGCTTGACGCTGCTG	791.989	1236.89
NCTY_N1674	GAATTTGACATTGTTCACATGATTGTTGCTCTGTAGGTCTTGATTCGCTTGACGCTGCTG	1680.95	1512.46
NCTY_N1682	GAATGATCTCATAATCACGTCCCATTCCCGGCTTAGGTCTTGATTCGCTTGACGCTGCTG	100.429	1555.52
NCTY_N1683	GAATTTTTTTGGGTTTACGTGATACTGCGTAAATAGGTCTTGATTCGCTTGACGCTGCTG	126.644	1570.13
NCTY_N1684	GAACAGGTATTACGTCAGGTGAAAAAAGCGGCCTAGGTCTTGATTCGCTTGACGCTGCTG	630.099	1109.25
NCTY_N1695	CTATTCAGCATTGGTCACGCTAAAATATACGTTTTCGTCTTGATTCGCTTGACGCTGCTG	544.055	1645.37
NCTY_N1707	GAAACCACTGCTTTCCACCTGATTTACTCTCATTAGGTCTTGATTCGCTTGACGCTGCTG	165.444	1043.95
NCTY_N1709	GAACTCCGATTTTGTCACGCAGCGTTCGTTTTTTAGGTCTTGATTCGCTTGACGCTGCTG	246.021	2732.89
NCTY_N1733	GAAGTAGCTCTTTATCACGCACACCTCATTTGCTAGGTCTTGATTCGCTTGACGCTGCTG	116.215	3101.11
NCTY_N1743	CTAAAGGCAGAGAATCACGATTGATAAAGATCATTCGTCTTGATTCGCTTGACGCTGCTG	67.0935	1098.49
NCTY_N175	CTAAAGTGTGGCGGTCACGCTGAACGCAGGAGATTCGTCTTGATTCGCTTGACGCTGCTG	1440.2	1409.64
NCTY_N1750	CTAGAATCCGAGAATCACATGAGGTTTGGGATATTCGTCTTGATTCGCTTGACGCTGCTG	422.49	1575.09
NCTY_N1786	GAAACAACAAAAATTTGCGTGATTGATAGAAGGTAGGTCTTGATTCGCTTGACGCTGCTG	138.318	1603.19
NCTY_N1801	CTACAATCGAGAGACTTCGTGATTTGTAAAAGTTTCGTCTTGATTCGCTTGACGCTGCTG	155.522	1200.28
NCTY_N1813	CTAATATAAATAAATCACGTCAAACGGTGCGTCTTCGTCTTGATTCGCTTGACGCTGCTG	111.721	1505.53
NCTY_N1817	GAACTATAATATTGTTGCGTGACAGCAAGTCTTTAGGTCTTGATTCGCTTGACGCTGCTG	223.465	2062.46
NCTY_N1826	GAATATAGTCAAAGTCACGCCTATACACTTAATTAGGTCTTGATTCGCTTGACGCTGCTG	1785.83	1791.01
NCTY_N1857	GAATGTGCGTCGTGTGACGTGATATTAATATAGTAGGTCTTGATTCGCTTGACGCTGCTG	1510.37	3388.4
NCTY_N1891	CTATGCTAAACTGGTCACGCCGTTATAGACAGCTTCGTCTTGATTCGCTTGACGCTGCTG	5529.21	1803.36
NCTY_N1906	CTATGAGAACGTTATCACGCGGATTATTTAGTTTTCGTCTTGATTCGCTTGACGCTGCTG	1275.03	3453.03
NCTY_N1913	GAAGTACACTTTCATCACGCAGTACGGATTTTTTAGGTCTTGATTCGCTTGACGCTGCTG	104.187	1882.52
NCTY_N1914	GAATGTTTATGACTTCACGCGACATGTATAGATTAGGTCTTGATTCGCTTGACGCTGCTG	171.998	2697.66
NCTY_N1915	GAACGTTTACCGTTTCGCGTGATCAACATCACATAGGTCTTGATTCGCTTGACGCTGCTG	1931.94	1911.83
NCTY_N1928	GAATGTCACTATCATCACGCCCTAGAGCCAAGTTAGGTCTTGATTCGCTTGACGCTGCTG	213.78	1790.69
NCTY_N1935	CTATTTATACACTATCACGCACATTAGGGTTCTTTCGTCTTGATTCGCTTGACGCTGCTG	199.133	2083.52
NCTY_N1947	GAATAAAGCAGAAATCACGATTCAAAAAAAAAATAGGTCTTGATTCGCTTGACGCTGCTG	144.203	1523.43
NCTY_N1951	GAACACGAGAATAATCACGAGAATAGAATGCACTAGGTCTTGATTCGCTTGACGCTGCTG	907.546	2956.38
NCTY_N1976	CTATAAAAGCATATATACGTGATTCATATGAAGTTCGTCTTGATTCGCTTGACGCTGCTG	165.742	1802.49
NCTY_N1978	CTACCGCGTAGAAATCACGTCGCGCAATGTGCGTTCGTCTTGATTCGCTTGACGCTGCTG	604.774	2948.95
NCTY_N1979	CTACCGGCCTCGTTATTCGTGATGCCTACTTAATTCGTCTTGATTCGCTTGACGCTGCTG	77.3874	1317.05
NCTY_N1991	GAACCTGTGTTCTATAACGTGAACCATAAGCTTTAGGTCTTGATTCGCTTGACGCTGCTG	114.714	2127.16
NCTY_N2002	GAAGCCGAGAGGAAGCGCGTGATGAAAGCACGATAGGTCTTGATTCGCTTGACGCTGCTG	783.15	2660.23
NCTY_N2039	GAAAGACGTGATTCGGGCGTGATTAATATTCCTTAGGTCTTGATTCGCTTGACGCTGCTG	534.23	1934.59
NCTY_N2112	CTATATAATACTAATCACGCATTGCAACTTCACTTCGTCTTGATTCGCTTGACGCTGCTG	507.391	2021.24
NCTY_N2114	CTAACACCCACCCAGATCGTGATTTTTGTTACCTTCGTCTTGATTCGCTTGACGCTGCTG	152.156	1989.22
NCTY_N2115	GAAGTCTCTGCCTGGAGCGTGACATTTAGGACGTAGGTCTTGATTCGCTTGACGCTGCTG	304.237	1382.16
NCTY_N213	CTATTTTGGTGAGGGTGCGTGACTTGAAACTAATTCGTCTTGATTCGCTTGACGCTGCTG	3136.33	3064.78
NCTY_N2159	CTAAGGATCGTCCGTGACATGAGTGTTTTTTTTTTCGTCTTGATTCGCTTGACGCTGCTG	178.494	1800.43
NCTY_N2181	GAAGAGTCCCATCATCACGCCCATCCTTTTGCATAGGTCTTGATTCGCTTGACGCTGCTG	158.95	1904.04
NCTY_N2197	GAATCTAGCAGTACTAGCGTGATGTTAATGTTATAGGTCTTGATTCGCTTGACGCTGCTG	155.908	1594.04
NCTY_N2204	GAACATAGTTTAGATCACGCTTAATAATGTCAATAGGTCTTGATTCGCTTGACGCTGCTG	1446.17	1618.31
NCTY_N2210	CTATATCTTACGCGTCACGCGTCGCGTTGCCGTTTCGTCTTGATTCGCTTGACGCTGCTG	3641.57	3058.84
NCTY_N2232	GAACGTAATAGGTATCACGCTATTTACTCTTGCTAGGTCTTGATTCGCTTGACGCTGCTG	312.368	1786.45
NCTY_N2256	CTATCTCTGGCCGATCACGCGCCATTGTCCCTCTTCGTCTTGATTCGCTTGACGCTGCTG	2229.59	2242.77
NCTY_N2258	GAATCTCCCACTTTATTCGTGATTTAGTGTAGATAGGTCTTGATTCGCTTGACGCTGCTG	80.761	1021.23
NCTY_N2269	GAATAACTCACTCATCACGCTGTTTCCGCTGAATAGGTCTTGATTCGCTTGACGCTGCTG	172.955	1917.58
NCTY_N228	GAACCAAAAGCTAATCACGAAATTGAGTGGATGTAGGTCTTGATTCGCTTGACGCTGCTG	92.7118	1287.48
NCTY_N2287	CTAAAATGGCATAATCACGTAGCAACCTGGAAATTCGTCTTGATTCGCTTGACGCTGCTG	137.211	1933.96
NCTY_N229	CTAGAACTCCGCCATCATGTGCTCAAGACTAGATTCGTCTTGATTCGCTTGACGCTGCTG	1145.58	2973.01
NCTY_N2309	GAATTTAACCGCCGTCACGCTCGTGCAGCGCGATAGGTCTTGATTCGCTTGACGCTGCTG	168.85	4185.02
NCTY_N2332	GAACCAGTGATGAAGCACCTGATTCAACTGCCGTAGGTCTTGATTCGCTTGACGCTGCTG	704.496	1275.81
NCTY_N2333	CTACTCAGGTGATGAAGCGTGATGACGATGACATTCGTCTTGATTCGCTTGACGCTGCTG	830.063	1621.48
NCTY_N2348	GAATGCGGATACGGTCACGCATCCGCAGAACAGTAGGTCTTGATTCGCTTGACGCTGCTG	828.271	1858.65
NCTY_N2365	CTAGCCCCTAGATGTCACCTGAGCTGTAGTCAATTCGTCTTGATTCGCTTGACGCTGCTG	1764.6	1036.17
NCTY_N2383	CTAAGACTTATATATCACGTAAAATTTGTCTCTTTCGTCTTGATTCGCTTGACGCTGCTG	137.869	1394.96
NCTY_N2394	CTAAGTAAAGTCGATCACGCCCTGTCAGGAACATTCGTCTTGATTCGCTTGACGCTGCTG	1001.21	2051.97
NCTY_N240	GAATAACCTGCTCTACACCTGACTCACATGACATAGGTCTTGATTCGCTTGACGCTGCTG	15860.1	2024.12
NCTY_N2423	CTACAGAAGACGTGCCGCGTGATTCCAAAGGTGTTCGTCTTGATTCGCTTGACGCTGCTG	1480.58	3283.11
NCTY_N2429	GAACCTTTATTTCATCGCGTGATTGAGGAGCATTAGGTCTTGATTCGCTTGACGCTGCTG	2051.34	2211.9
NCTY_N2430	CTATATTTTAATCAACACCTGATATTTTCTTGATTCGTCTTGATTCGCTTGACGCTGCTG	637.183	1377.84
NCTY_N2480	GAAAAATGATTTCGACAGGTGACCTTTAAGTTCTAGGTCTTGATTCGCTTGACGCTGCTG	5370.65	1590.94
NCTY_N2485	GAAAGGGCCCTTAAAGGCGTGACTACAAAAAGGTAGGTCTTGATTCGCTTGACGCTGCTG	4335.98	1900.49
NCTY_N2491	CTATTTAAAAAGCGTTGCGTGATGTTTGGGTGCTTCGTCTTGATTCGCTTGACGCTGCTG	143.397	2239.94
NCTY_N2498	CTAAGACATCTTAGTCAGCTGAGACAAGAAAGGTTCGTCTTGATTCGCTTGACGCTGCTG	901.997	1309.2
NCTY_N2502	CTAGCCTGATGTAATCACGAACTCGAACAAAAGTTCGTCTTGATTCGCTTGACGCTGCTG	70.6701	1591.42
NCTY_N2504	GAAACATGTACATATCACGTAAGATGTTCCTATTAGGTCTTGATTCGCTTGACGCTGCTG	136.296	2372.05
NCTY_N2506	GAAGTAAGATCGGATCACGCTGCCAAGGCGCATTAGGTCTTGATTCGCTTGACGCTGCTG	1145.65	2430.09
NCTY_N2511	CTAATCCGGAAAAACTACGTGACAGGAACGATGTTCGTCTTGATTCGCTTGACGCTGCTG	209.747	2079.72
NCTY_N2517	CTAACCTAATAACTTCATGTGATCTGCTCCCCCTTCGTCTTGATTCGCTTGACGCTGCTG	2531.22	1753.5
NCTY_N2536	CTACTAGTATATTATCACATGATATTTCTCAAATTCGTCTTGATTCGCTTGACGCTGCTG	20942.4	2013.15
NCTY_N2539	CTAATTAACTATTTTAGCGTGACTGACTGATAATTCGTCTTGATTCGCTTGACGCTGCTG	276.94	1945.52
NCTY_N2545	GAATGCATAATGACGGACGTGACTATAAATTTCTAGGTCTTGATTCGCTTGACGCTGCTG	1019.31	1879.05
NCTY_N2546	GAAAGTCGGAACTATCACGTAGTTTGAAAATGTTAGGTCTTGATTCGCTTGACGCTGCTG	167.352	1733.5
NCTY_N2552	GAACACGCGTCCGAACGCGTGAGCATATATGCATAGGTCTTGATTCGCTTGACGCTGCTG	323.209	4256.64
NCTY_N2554	CTACAATTTTAAGAATACGTGATAGATGCTTCGTTCGTCTTGATTCGCTTGACGCTGCTG	150.63	2163.31
NCTY_N2555	GAATAAAAAATGCATCACGACTCGTTTAGACAATAGGTCTTGATTCGCTTGACGCTGCTG	145.129	1928.06
NCTY_N257	CTAGATGCTTGGGATCACGTATGCCGTTAACTCTTCGTCTTGATTCGCTTGACGCTGCTG	178.978	1478.14
NCTY_N2572	GAATTATTATTTTGTCACACGTCTCCCTTGAATTAGGTCTTGATTCGCTTGACGCTGCTG	215.627	2306.81
NCTY_N2580	CTAAATGATTCGTATCACATGTTTTTCTATCGTTTCGTCTTGATTCGCTTGACGCTGCTG	17971.2	3810.99
NCTY_N2585	GAAATTGATTTCAATCACGCTTTAAAGTTTTTTTAGGTCTTGATTCGCTTGACGCTGCTG	716.341	1624.77
NCTY_N2597	GAATCCGCCGCAATTTTCGTGACGAATGTCGTTTAGGTCTTGATTCGCTTGACGCTGCTG	172.242	1445.3
NCTY_N2598	CTAGCTAAATTTAAGGGCGTGATCTCAGAACTCTTCGTCTTGATTCGCTTGACGCTGCTG	1540.01	1767.21
NCTY_N260	GAAACACGGGCGGCATTCGTGATGACAATAGATTAGGTCTTGATTCGCTTGACGCTGCTG	120.647	3025.42
NCTY_N2611	CTACTTTACCTAAATCATGTGGCCTATCTTCAGTTCGTCTTGATTCGCTTGACGCTGCTG	2031.82	3095.52
NCTY_N2612	GAAATTCCCTATAATCACGACGATAGGACTGTATAGGTCTTGATTCGCTTGACGCTGCTG	108.785	1469.23
NCTY_N2613	GAATCTCCCCCAGGTCACGATATAAATGTCAATTAGGTCTTGATTCGCTTGACGCTGCTG	1564.84	1613.63
NCTY_N2620	GAAGTAACAAAAAATCAGGTGAGTAATATCAGTTAGGTCTTGATTCGCTTGACGCTGCTG	1163.85	1364.81
NCTY_N2625	CTAATAACGACATGTCAGGTGGTACTGTAAGTTTTCGTCTTGATTCGCTTGACGCTGCTG	3589.2	2291.04
NCTY_N2682	CTATGGAGGGCAAATCACGATAGGAAGAGGCATTTCGTCTTGATTCGCTTGACGCTGCTG	108.873	1674.62
NCTY_N2699	CTAATTTAGAGTTTTCACGTTATGTGACCATCTTTCGTCTTGATTCGCTTGACGCTGCTG	172.223	1798.82
NCTY_N2718	GAATGCTTATATAATCACGAACACCTTTACGTATAGGTCTTGATTCGCTTGACGCTGCTG	88.7888	1801.12
NCTY_N2735	CTAATGCTCTATTATATCGTGATTTAATGACGGTTCGTCTTGATTCGCTTGACGCTGCTG	160.941	1460.75
NCTY_N2739	GAACCACTCATAAATCACGACGCTACGTAGTTCTAGGTCTTGATTCGCTTGACGCTGCTG	133.516	1669.35
NCTY_N2742	CTACTCTTTACACCGTACGTGATAATACACTAATTCGTCTTGATTCGCTTGACGCTGCTG	122.116	2320.92
NCTY_N2752	CTAACTTCATTTCATCACGCTCATATTGTTTGTTTCGTCTTGATTCGCTTGACGCTGCTG	199.14	2109.44
NCTY_N2764	CTACGATAGCTTTATTGCGTGATCTTCCCTTACTTCGTCTTGATTCGCTTGACGCTGCTG	141.712	1583.14
NCTY_N2765	CTACAGTCACTCAGTCAGCTGATGCGATGCGATTTCGTCTTGATTCGCTTGACGCTGCTG	7393.28	1379.72
NCTY_N2777	CTAACTAAAACTATGTGCGTGATAAATGGTTCTTTCGTCTTGATTCGCTTGACGCTGCTG	224.009	2772.9
NCTY_N2780	CTATCTATATTCACTCACGTTATGCGCCTGAATTTCGTCTTGATTCGCTTGACGCTGCTG	315.499	2457.2
NCTY_N2793	GAAGAAGGAGAGAATCACGCAAAAATCACATTATAGGTCTTGATTCGCTTGACGCTGCTG	142.408	1798.25
NCTY_N2797	CTAAATATTGTATAGTACGTGATTCTGGCTAGTTTCGTCTTGATTCGCTTGACGCTGCTG	330.553	1948.33
NCTY_N28	CTAAGGTAGTTGGATCAGCTGAAGTATTTGGGTTTCGTCTTGATTCGCTTGACGCTGCTG	71.5611	1234.66
NCTY_N2806	GAAACAACGATTGATCACGCAGATGACTAACCGTAGGTCTTGATTCGCTTGACGCTGCTG	632.163	1941.57
NCTY_N2819	GAAAAGAGTTTAGATCACGAGTATTTTCGCTCTTAGGTCTTGATTCGCTTGACGCTGCTG	4607.73	1928.34
NCTY_N2820	CTAAAACTCAACAGCTGCGTGATGAACGCGCTGTTCGTCTTGATTCGCTTGACGCTGCTG	91.384	1809.65
NCTY_N2837	CTAGCTTGTGTTGATCACGTCTTACGGGAAATATTCGTCTTGATTCGCTTGACGCTGCTG	639.664	1956.55
NCTY_N2847	CTAACCATTGTTCATCACGATCATGAAACTCGCTTCGTCTTGATTCGCTTGACGCTGCTG	98.445	1549.81
NCTY_N2866	GAAAGCAAAAGGCAGTGCGTGATAATGTTTCTATAGGTCTTGATTCGCTTGACGCTGCTG	154.577	2516.64
NCTY_N2880	CTAGCGCTGCTAAATCATGTGAGTTTAGCGCGTTTCGTCTTGATTCGCTTGACGCTGCTG	2140.16	1518.98
NCTY_N2884	CTAGGGCAAGTAAGTCACGTACTTTTTTTTTTTTTCGTCTTGATTCGCTTGACGCTGCTG	3188.35	2672.39
NCTY_N2913	CTACCCCGCTTTCATCATGTGAACATCTATAGATTCGTCTTGATTCGCTTGACGCTGCTG	1822.38	2183.12
NCTY_N292	CTATTTGATGAAAATCACGATAGTTAATTTTTCTTCGTCTTGATTCGCTTGACGCTGCTG	80.8657	1123.57
NCTY_N2931	GAAAAACTGAGTCATCACGTAATATTCTAATTATAGGTCTTGATTCGCTTGACGCTGCTG	140.662	1689.86
NCTY_N2935	CTAACGGTGAACTGTCACGAGAACCCTTACTTGTTCGTCTTGATTCGCTTGACGCTGCTG	696.535	1496.97
NCTY_N2949	CTAAATCTCATTTTTTTCGTGATTATTAATTTTTTCGTCTTGATTCGCTTGACGCTGCTG	112.106	1316.03
NCTY_N2951	CTAGTGATTTAATGATTCGTGACTATTTCTTTGTTCGTCTTGATTCGCTTGACGCTGCTG	199.971	1562.37
NCTY_N2960	CTATAAATAAGAGGGTACGTGATTATAAACAGATTCGTCTTGATTCGCTTGACGCTGCTG	482.406	2368.68
NCTY_N2966	GAATGCACACGAAATCACGAGAATAATCACGAGTAGGTCTTGATTCGCTTGACGCTGCTG	3800.26	2223.11
NCTY_N297	CTACAGATGATTTTTCACATGATTTTTGTTAGATTCGTCTTGATTCGCTTGACGCTGCTG	547.118	1680.93
NCTY_N298	GAATGAAGGCATCGTGACGTGATGATATAGGTGTAGGTCTTGATTCGCTTGACGCTGCTG	619.872	2933.28
NCTY_N2984	GAACATCGCAAAAATCAGCTGAAAAATTTTGAATAGGTCTTGATTCGCTTGACGCTGCTG	88.2631	1230.71
NCTY_N2988	GAAAGAATACCAGATCACCTGTTTGGATATATATAGGTCTTGATTCGCTTGACGCTGCTG	5540.92	1790.75
NCTY_N3016	GAAAAAAGTAGTAGTCACGTAGCTTAATTGTATTAGGTCTTGATTCGCTTGACGCTGCTG	907.056	2353.61
NCTY_N3030	CTATGGCTCAGTAATCACGAATAAAAGTAGGTGTTCGTCTTGATTCGCTTGACGCTGCTG	83.241	1570.05
NCTY_N3032	CTATTTTATTAATGTCAGCTGAACCTCGTATTTTTCGTCTTGATTCGCTTGACGCTGCTG	432.458	1220.3
NCTY_N3057	GAAGAGCTAAAAAGTCACGTATGTAGTGCTAATTAGGTCTTGATTCGCTTGACGCTGCTG	572.918	1854.84
NCTY_N3060	GAACCCATATTAAATCACGCCTATCAACACTTATAGGTCTTGATTCGCTTGACGCTGCTG	322.48	2296.86
NCTY_N3064	GAATTGCACTTACGTGACGTGACGAAATATTAGTAGGTCTTGATTCGCTTGACGCTGCTG	1417.77	2193.9
NCTY_N3067	GAAAACCGTCCCTGTCACGCTGGTGCCCCCACATAGGTCTTGATTCGCTTGACGCTGCTG	220.393	2485.96
NCTY_N3068	CTAAAGATTTACTCTCCCGTGATGCCGGGCCAATTCGTCTTGATTCGCTTGACGCTGCTG	602.215	1276
NCTY_N3075	CTAAATTTCTATCTTCACGCGCTTTCTCACTAATTCGTCTTGATTCGCTTGACGCTGCTG	93.1704	2461.62
NCTY_N3087	CTAAAAGAAGTATATCACGCTACAAAAATTCATTTCGTCTTGATTCGCTTGACGCTGCTG	453.363	1703.93
NCTY_N3096	CTACTTTACAATCGTGATGTGCCTATTTAATTCTTCGTCTTGATTCGCTTGACGCTGCTG	260.144	2109.66
NCTY_N3103	GAATTTTCACGTCGTCATGTGTTTCTTCAGCGCTAGGTCTTGATTCGCTTGACGCTGCTG	1709.35	3435.24
NCTY_N3119	GAACCGAATTGTAATCTCGTGAAATACAAAAGGTAGGTCTTGATTCGCTTGACGCTGCTG	338.696	1682.23
NCTY_N3122	CTATTAGGAAACAATCACGAGACGATAACGACGTTCGTCTTGATTCGCTTGACGCTGCTG	4741.37	2431.07
NCTY_N3143	GAAGGAACGGCAAATCACGAAAATTTTCTGTCATAGGTCTTGATTCGCTTGACGCTGCTG	92.6555	1290.97
NCTY_N3153	CTAATTATAGAGAGTCACGCTGAACACGCGGCGTTCGTCTTGATTCGCTTGACGCTGCTG	1275.32	3342.68
NCTY_N3159	GAATAATAGTGGAATCAGGTGCCTAAATAAATGTAGGTCTTGATTCGCTTGACGCTGCTG	3976.76	1679.01
NCTY_N3180	CTACAAGCGAGAAGTCACGCTTATAACGCAAGTTTCGTCTTGATTCGCTTGACGCTGCTG	1517.28	1740.62
NCTY_N3201	GAACCGGATCGTAGTCACATGATCAAATAAATTTAGGTCTTGATTCGCTTGACGCTGCTG	42769.9	2591.77
NCTY_N3217	GAAACTACGATGTTGTACGTGATCGAGAAAATTTAGGTCTTGATTCGCTTGACGCTGCTG	474.82	2051.12
NCTY_N3237	CTAGTTCTCAAACGTCACGCTATGAACAGTACATTCGTCTTGATTCGCTTGACGCTGCTG	169.619	1896.46
NCTY_N3248	CTACAAAAAATTCATCACGAAGTGCTAAAGGAATTCGTCTTGATTCGCTTGACGCTGCTG	110.321	2106.93
NCTY_N325	CTACGACTGCGTGCGTGCGTGATTGGTAATGCATTCGTCTTGATTCGCTTGACGCTGCTG	341.418	5555.96
NCTY_N3254	CTACGGTCGCTTACATGCGTGATATTTAGGGGATTCGTCTTGATTCGCTTGACGCTGCTG	156.08	2621.96
NCTY_N329	GAATATCTTACTCATCACGCAAGACAGCAGCAGTAGGTCTTGATTCGCTTGACGCTGCTG	51.6099	1541.43
NCTY_N3296	CTAAGATAAAAAGAGAGCGTGATATAAATGAATTTCGTCTTGATTCGCTTGACGCTGCTG	420.19	2048.97
NCTY_N3300	GAATTCAAGTTATATAACGTGAGAGATAAAATATAGGTCTTGATTCGCTTGACGCTGCTG	409.361	2048.77
NCTY_N3333	GAAAAGCATATGAGTCACGACGTGACCCTCGAATAGGTCTTGATTCGCTTGACGCTGCTG	2459.31	2407.83
NCTY_N3338	CTACATATCACTTAGTACGTGATAGTGCCCAAATTCGTCTTGATTCGCTTGACGCTGCTG	130.331	2138.6
NCTY_N3343	GAACACAATTAATGTCATGTGGCCGACGTAATGTAGGTCTTGATTCGCTTGACGCTGCTG	4101.08	3427.25
NCTY_N3350	CTAACAGGACCGCATCACGTCAGAATAGTTTTTTTCGTCTTGATTCGCTTGACGCTGCTG	104.278	1639.63
NCTY_N338	GAATGGAAACTCCGACGCGTGAGGCCTCGCGTCTAGGTCTTGATTCGCTTGACGCTGCTG	53.4822	1444.58
NCTY_N3386	CTAGAACACTTTAATCACGCTTATTTAATTAAGTTCGTCTTGATTCGCTTGACGCTGCTG	2047.49	2058.51
NCTY_N339	GAACTTCGCATTAAGCGCGTGAAACTATTGGCATAGGTCTTGATTCGCTTGACGCTGCTG	125.917	2064.18
NCTY_N3401	GAACTTTATTTTTTTGGCGTGACCAGCGGGTACTAGGTCTTGATTCGCTTGACGCTGCTG	1368.22	1648.26
NCTY_N3449	GAACCAATTTTTTGTCACGCTTATTAGAATATTTAGGTCTTGATTCGCTTGACGCTGCTG	4709.76	2412.69
NCTY_N345	CTATTAAAGAACGATCAGCTGAAGCTGTGATAATTCGTCTTGATTCGCTTGACGCTGCTG	115.032	1541.92
NCTY_N3476	GAAGAGGCTGCTTATGTCGTGATGCTTATACTATAGGTCTTGATTCGCTTGACGCTGCTG	165.49	1529.91
NCTY_N3499	GAAAATTATCAATGCGACGTGATTTCTGGTTGCTAGGTCTTGATTCGCTTGACGCTGCTG	201.579	2200.1
NCTY_N3514	GAAACGAAAATCTATCAGCTGAACATCTAGACTTAGGTCTTGATTCGCTTGACGCTGCTG	111.431	1260.47
NCTY_N3545	CTAATTGTGCAGGTTCAGCTGATGTATAGGCTGTTCGTCTTGATTCGCTTGACGCTGCTG	92.5007	1388.64
NCTY_N3558	CTAAAGTCCATCCTTCACATGACTTGAATCCCTTTCGTCTTGATTCGCTTGACGCTGCTG	5702.42	1755.97
NCTY_N356	GAATTCAAAATTCAGCACCTGATTTAGTAAAGGTAGGTCTTGATTCGCTTGACGCTGCTG	1984.98	1347.41
NCTY_N3579	CTATCGCAACGGTACGTCGTGATTTTTTTATGGTTCGTCTTGATTCGCTTGACGCTGCTG	199.449	1405.7
NCTY_N3589	CTAGCGAAAAGATGTCACACGTCAGTAAATCCGTTCGTCTTGATTCGCTTGACGCTGCTG	409.591	1766.82
NCTY_N3596	CTAAAGTAGTTGGATCAGCTGAAGTAGTTTGAATTCGTCTTGATTCGCTTGACGCTGCTG	117.443	1539.66
NCTY_N3601	GAATGATGTTGCAGACTCGTGATCACAGTTTACTAGGTCTTGATTCGCTTGACGCTGCTG	15664	2900.97
NCTY_N3608	GAATTCTTGCATTTTCGCGTGATATCAAAATTATAGGTCTTGATTCGCTTGACGCTGCTG	607.813	2031.23
NCTY_N3612	GAACACGGGATTTGTCACGCAGCGGATTTATTTTAGGTCTTGATTCGCTTGACGCTGCTG	2934.78	3193.37
NCTY_N3624	CTAGTTTACAATAATCACGAAAATACATATAGGTTCGTCTTGATTCGCTTGACGCTGCTG	87.9564	1518.73
NCTY_N3631	CTAACTTATTTTCATCACGAATACGAGAAGGGCTTCGTCTTGATTCGCTTGACGCTGCTG	67.4301	1196.82
NCTY_N3636	CTATCACGCCCGAATCACGTCTATTGCAGATATTTCGTCTTGATTCGCTTGACGCTGCTG	216.479	2004.47
NCTY_N3639	GAACTTTTCTGGATGGGCGTGATTGTATTAGCTTAGGTCTTGATTCGCTTGACGCTGCTG	227.35	2152.26
NCTY_N3651	GAAAGTAATAAGCTTGACGTGATGTACTTAGTCTAGGTCTTGATTCGCTTGACGCTGCTG	96.9681	1161.73
NCTY_N3658	CTAATTGAACCTAAGAGCGTGATATTTTTACTCTTCGTCTTGATTCGCTTGACGCTGCTG	126.714	1651.94
NCTY_N3687	CTAGCTCAACTTCATCACGTCCTTGGTTTTTACTTCGTCTTGATTCGCTTGACGCTGCTG	133.716	1846.33
NCTY_N3700	GAAAAAATAAGGCGTCAGGTGACCAGGCACCTCTAGGTCTTGATTCGCTTGACGCTGCTG	40235.7	1422.16
NCTY_N3704	CTATACTCAAGAAGTCACGCTGTCATTTGATGGTTCGTCTTGATTCGCTTGACGCTGCTG	3782.99	2264.58
NCTY_N3713	CTAGGCTCTTCAAACCATGTGACACCAAACTTCTTCGTCTTGATTCGCTTGACGCTGCTG	16086.4	3430.55
NCTY_N3717	CTAATAAACTTCAATCAGGTGATTTTTTTTTTGTTCGTCTTGATTCGCTTGACGCTGCTG	19860.9	1644.07
NCTY_N3721	CTACACGAATAACATCACGAAATTTATCGACAGTTCGTCTTGATTCGCTTGACGCTGCTG	137.135	1941.89
NCTY_N3722	CTAGCATCTGCAATGTGCGTGATTTCTCCGTTATTCGTCTTGATTCGCTTGACGCTGCTG	111.707	2423.2
NCTY_N3735	CTAAAATAACTAAGTCACGATATTTGTTTTATGTTCGTCTTGATTCGCTTGACGCTGCTG	5989.32	1796.64
NCTY_N3742	CTACGCTCATAATATCATGTGATTCTCTCGATGTTCGTCTTGATTCGCTTGACGCTGCTG	18895.6	1460.65
NCTY_N3744	GAAAACCATCCACTTCACGAGACTGATCTCCTCTAGGTCTTGATTCGCTTGACGCTGCTG	142.75	1517.12
NCTY_N3747	GAACCGCTTAATGATCACGCACAAAAAAAAAAATAGGTCTTGATTCGCTTGACGCTGCTG	3050.78	2621.98
NCTY_N3759	GAATCTTGTCGTAGTAGCGTGATTCTATTCAGTTAGGTCTTGATTCGCTTGACGCTGCTG	306.562	1663.2
NCTY_N3816	CTATGGAGATCCAGTCACGCCGGATGACTGGGTTTCGTCTTGATTCGCTTGACGCTGCTG	560.618	1402.13
NCTY_N383	GAAGCCCTTATCAATCACGCTAAAAATTGCCCCTAGGTCTTGATTCGCTTGACGCTGCTG	172.651	1832.42
NCTY_N3831	CTAAGCACGTGAGTATACGTGATTAAGCACACATTCGTCTTGATTCGCTTGACGCTGCTG	18397.7	15029.2
NCTY_N3834	GAACACTAGCTTATATACGTGACTTCTGTGACTTAGGTCTTGATTCGCTTGACGCTGCTG	364.984	1728.9
NCTY_N3843	CTAATATTCTGATTTCTCGTGATCGAATCTGTTTTCGTCTTGATTCGCTTGACGCTGCTG	1891.09	1336.7
NCTY_N3855	GAAAAGAATCTTAATCACGAATTAGGCGTATTGTAGGTCTTGATTCGCTTGACGCTGCTG	171.499	1641.68
NCTY_N3867	GAACTCCGCTTGAATCACGTCTTCTAAGCGGGATAGGTCTTGATTCGCTTGACGCTGCTG	258.31	1302.73
NCTY_N3877	GAATTTCAGTTTCCGCGCGTGACTTAGATTTGGTAGGTCTTGATTCGCTTGACGCTGCTG	13194.3	2873.01
NCTY_N3885	CTAAAAAACCGCAATCACGTAACCGTGGCTTCCTTCGTCTTGATTCGCTTGACGCTGCTG	341.108	2233.64
NCTY_N3897	GAAGGGTCAGCAACTGACGTGACTCAGCCTGGCTAGGTCTTGATTCGCTTGACGCTGCTG	129.557	914.617
NCTY_N390	GAACTAAACCGATATCACGCTAGTATTTATTTCTAGGTCTTGATTCGCTTGACGCTGCTG	214.686	1899.47
NCTY_N3907	CTATTAGGTGCCTGTCACGCAATCCGTCCGCTGTTCGTCTTGATTCGCTTGACGCTGCTG	201.147	1971.66
NCTY_N3926	CTAAGCTTTTCAAATCACGCAATGGAATATTTGTTCGTCTTGATTCGCTTGACGCTGCTG	179.691	1865.98
NCTY_N3930	CTATTAATGACGAATCACGAAGAAAATATATCTTTCGTCTTGATTCGCTTGACGCTGCTG	105.179	1457.92
NCTY_N3948	CTATTCAACATTGCGGGCGTGATTATAGGTCAGTTCGTCTTGATTCGCTTGACGCTGCTG	169.254	1995.39
NCTY_N3978	GAACTTTCAGCTGGTCACGCTATGCCTAAAGAATAGGTCTTGATTCGCTTGACGCTGCTG	3999.88	1467.03
NCTY_N3981	CTACGTTTTATATATCACGCTAAAGTGAGACTATTCGTCTTGATTCGCTTGACGCTGCTG	207.843	1939.12
NCTY_N3998	CTACCTTCGCCATAGTTCGTGATGAAAACTTTATTCGTCTTGATTCGCTTGACGCTGCTG	143.492	1423.22
NCTY_N400	CTATCATTTACTATTCTCGTGATATTTTAGTAGTTCGTCTTGATTCGCTTGACGCTGCTG	1344.36	1962.74
NCTY_N4000	CTAGCATCAATATATGGTGTGACCAGATTGGACTTCGTCTTGATTCGCTTGACGCTGCTG	375.938	1390.4
NCTY_N402	CTATTTTGTTACTGTCATGTGAATAAAACTTATTTCGTCTTGATTCGCTTGACGCTGCTG	2194.32	2243.83
NCTY_N4020	CTAAATCTTCAAAATCATGTGGATTTTTATTGATTCGTCTTGATTCGCTTGACGCTGCTG	1025.57	1848.74
NCTY_N4032	GAATGTAAACTGTATCACGCATACTTTTTGCTGTAGGTCTTGATTCGCTTGACGCTGCTG	252.336	2636
NCTY_N4037	GAAAATACCCGGCATCACGCATTTATTATATGATAGGTCTTGATTCGCTTGACGCTGCTG	192.582	2370.95
NCTY_N4049	GAAATCGGTCAGTATCACGCTCATATGACAAGATAGGTCTTGATTCGCTTGACGCTGCTG	261.822	1734.87
NCTY_N4097	GAAGTAGAAGGTCATCACGAATATTAATTTTGTTAGGTCTTGATTCGCTTGACGCTGCTG	89.2756	1455.62
NCTY_N4104	CTAAGTTTTCATTGTCACGTATCTGCAATGGCATTCGTCTTGATTCGCTTGACGCTGCTG	391.202	2131.09
NCTY_N411	CTACGTATCCTTGTACGCGTGATTTATTTATATTTCGTCTTGATTCGCTTGACGCTGCTG	4504.07	3344.42
NCTY_N4115	GAATTATATGTGTATTACGTGATATACAGTGACTAGGTCTTGATTCGCTTGACGCTGCTG	201.141	1963.52
NCTY_N4129	GAACTAATGTGAGTTCACGTTATAGAAGCTGGATAGGTCTTGATTCGCTTGACGCTGCTG	233.555	1858.94
NCTY_N4156	GAACTGTACACGTATATCGTGACCCGGCGCCAATAGGTCTTGATTCGCTTGACGCTGCTG	1094.62	2445.24
NCTY_N4157	GAACTCGAGTTCAATCACGTCACCAATAGTAATTAGGTCTTGATTCGCTTGACGCTGCTG	250.432	1638.06
NCTY_N4167	GAAGTTTTATCGTATCACGGGATTTTATGCTCTTAGGTCTTGATTCGCTTGACGCTGCTG	22219.7	2073.65
NCTY_N4168	CTAGCCCAGTTAATTTTCGTGATTTTTCCCTTCTTCGTCTTGATTCGCTTGACGCTGCTG	63.2616	1392.53
NCTY_N4173	GAAATTTTTAAAAATCACGTAGGATAAATAGTATAGGTCTTGATTCGCTTGACGCTGCTG	318.233	2111.54
NCTY_N4182	CTAGTCAGTATTTATAGCGTGATAGTTCATTACTTCGTCTTGATTCGCTTGACGCTGCTG	161.465	1405.89
NCTY_N4187	CTACAGTCGCTTTAATGCGTGATTATAGAAAAGTTCGTCTTGATTCGCTTGACGCTGCTG	158.787	2014.46
NCTY_N4224	GAAAGGTAACCGCATCACGACTTATCGCATTTCTAGGTCTTGATTCGCTTGACGCTGCTG	91.1647	2022.16
NCTY_N4225	GAATATTTCTCATTTCACGTTATTTTCTCCAAATAGGTCTTGATTCGCTTGACGCTGCTG	256.315	2519.76
NCTY_N423	GAAACCGAGTGAGTCAGCGTGATCGGCCTCATTTAGGTCTTGATTCGCTTGACGCTGCTG	383.836	1597.55
NCTY_N424	CTAAAGTATATAAGCAGCGTGATTGTCCGATCGTTCGTCTTGATTCGCTTGACGCTGCTG	191.35	2017.7
NCTY_N4241	CTAATCCTTTCCTGTCACATGAAGAGAAAAAGGTTCGTCTTGATTCGCTTGACGCTGCTG	6613.44	1599.98
NCTY_N4275	GAAAGACTCATATCCTTCGTGATTAGTTTCTTTTAGGTCTTGATTCGCTTGACGCTGCTG	145.102	1244.31
NCTY_N4279	GAATTTGTTATTGATCACGCCTTGTAGGGGAAATAGGTCTTGATTCGCTTGACGCTGCTG	3662.83	2110.77
NCTY_N4289	CTACATTGAAATAATATCGTGATTATGGGCTGGTTCGTCTTGATTCGCTTGACGCTGCTG	310.142	1657.52
NCTY_N4304	CTATTTTTCTTCTGTCAGGTGAAAGTATATGACTTCGTCTTGATTCGCTTGACGCTGCTG	508.435	1068.75
NCTY_N4349	CTATTCCAATGGGATTGCGTGATTATGTTTCGTTTCGTCTTGATTCGCTTGACGCTGCTG	147.204	1654.39
NCTY_N4354	CTAGGTCAAAAAAATCAGGTGGATACATAACTTTTCGTCTTGATTCGCTTGACGCTGCTG	497.483	1373.32
NCTY_N4364	CTAAGATATGTTACTCACGCGTCGCGTCGCTCCTTCGTCTTGATTCGCTTGACGCTGCTG	96.2639	2070.65
NCTY_N4392	GAACGAATAGAGTATCAGCTGACGGAATGGAGATAGGTCTTGATTCGCTTGACGCTGCTG	3145.18	1307.85
NCTY_N4425	GAACCATAAAGCCTTCACGTTATACTTTTTTTTTAGGTCTTGATTCGCTTGACGCTGCTG	197.642	2264
NCTY_N4429	GAAAACTAGATGGCGCTCGTGATCCTGAAAACGTAGGTCTTGATTCGCTTGACGCTGCTG	2851.88	2395.93
NCTY_N4465	GAATATGGTTAATGTCACGAGATGAATTGTTATTAGGTCTTGATTCGCTTGACGCTGCTG	12321.9	2875.14
NCTY_N4467	CTATCTGCTCCGCATCACGATACACGAGGTGCATTCGTCTTGATTCGCTTGACGCTGCTG	633.354	5785.35
NCTY_N4471	CTACGATATCTTTATCAGGTGATTCTTACGCGCTTCGTCTTGATTCGCTTGACGCTGCTG	12015.9	1467.22
NCTY_N4479	CTAAGTGATTTTGTAGGCGTGATCAAGTGCTTATTCGTCTTGATTCGCTTGACGCTGCTG	4144.61	2180.84
NCTY_N4503	GAACGTCGTGATGTTCACGCGCTTTGCCCACATTAGGTCTTGATTCGCTTGACGCTGCTG	232.956	2430.74
NCTY_N4512	CTACCCTTTTTCTATCACGAGGTTACTGAGCCATTCGTCTTGATTCGCTTGACGCTGCTG	8106.29	4084.19
NCTY_N4527	GAATCAGACAGTTCTGTCGTGATGGGAGAACTGTAGGTCTTGATTCGCTTGACGCTGCTG	90.5233	1503.41
NCTY_N4528	GAAGCGTGTTCTAGTCACGAAACGCGCCAAAAATAGGTCTTGATTCGCTTGACGCTGCTG	101.725	2106.66
NCTY_N4531	GAAGTCATAAAAAGAGACGTGATTAAACCTAAATAGGTCTTGATTCGCTTGACGCTGCTG	200.32	2250.68
NCTY_N4552	GAACTCTTTACCACTCAGCTGACTTTATTATTTTAGGTCTTGATTCGCTTGACGCTGCTG	3362.67	1675.42
NCTY_N4575	CTATTAAGTTGAAATCACGCTAACATATGACTATTCGTCTTGATTCGCTTGACGCTGCTG	184.481	1539.56
NCTY_N4589	CTAGAACTCTTTCAACACCTGACGAATGTATAATTCGTCTTGATTCGCTTGACGCTGCTG	661.287	1362.52
NCTY_N4607	CTAAATAATTAGTATCCCGTGATTTTGAGCTGTTTCGTCTTGATTCGCTTGACGCTGCTG	12133.6	1696.77
NCTY_N461	GAATTGTCTTAGTATCACCTGAGTGGTTATTCATAGGTCTTGATTCGCTTGACGCTGCTG	1567.38	1463.53
NCTY_N4629	CTATACATATACTGTCACGCGACATTTTCACCTTTCGTCTTGATTCGCTTGACGCTGCTG	8534	4124.67
NCTY_N4643	CTATTACAACATAATCACGCTTTCTTCTAGTTGTTCGTCTTGATTCGCTTGACGCTGCTG	367.95	1931.15
NCTY_N4673	GAACCAAGCCATGGTCATGTGATTTCCATGTGCTAGGTCTTGATTCGCTTGACGCTGCTG	31416.7	2730.02
NCTY_N4692	GAATCATAAGAGAGGAGCGTGATCTGTAATTCCTAGGTCTTGATTCGCTTGACGCTGCTG	5511.5	1912.6
NCTY_N4704	GAACGCGATGTTGCAAGCGTGACAGATCTATACTAGGTCTTGATTCGCTTGACGCTGCTG	241.503	1996.38
NCTY_N4714	CTAATGTAGTATGCGCACCTGATGCGCATAATATTCGTCTTGATTCGCTTGACGCTGCTG	1587.05	2266.49
NCTY_N4717	GAAGGGATGCTTCGTCACGTAAAATGGCCGCCGTAGGTCTTGATTCGCTTGACGCTGCTG	145.79	1646.7
NCTY_N4720	GAATACTTATGTATTTGCGTGATAAACTTGCTTTAGGTCTTGATTCGCTTGACGCTGCTG	84.8808	1623.62
NCTY_N4736	CTAATAAATCATAATCACGTAAAGCCACCGAAATTCGTCTTGATTCGCTTGACGCTGCTG	216.321	1396.87
NCTY_N4746	CTAACAGTATTTCATCACGACAAGCATATCCAATTCGTCTTGATTCGCTTGACGCTGCTG	134.677	1686.55
NCTY_N4798	CTAATGTACATAAGTCACGTTTTTGCAGCCAATTTCGTCTTGATTCGCTTGACGCTGCTG	14108.5	7886.7
NCTY_N48	GAAAACTCGTCAAGTCACGTTTGGTGGACGGCCTAGGTCTTGATTCGCTTGACGCTGCTG	4648.93	2963.53
NCTY_N4805	GAAATTCAGCATTATCACGCCCTTCCACCAACGTAGGTCTTGATTCGCTTGACGCTGCTG	118.99	1839.42
NCTY_N4815	CTAATGCGGTGGTATCACATGAAGAGTAAATAATTCGTCTTGATTCGCTTGACGCTGCTG	1508.79	1999.91
NCTY_N4827	CTAAATAGTAATTGTCACGCAATATCTTGTGGATTCGTCTTGATTCGCTTGACGCTGCTG	174.557	1863.21
NCTY_N4831	GAATTTGTATCTTTTGACGTGATCAAAAGTAATTAGGTCTTGATTCGCTTGACGCTGCTG	251.543	1521.37
NCTY_N4838	CTAACACTGCGCCTTTTCGTGATGATGCATTTGTTCGTCTTGATTCGCTTGACGCTGCTG	63.843	2277.86
NCTY_N4844	CTAGTACAAAATGATCACGCAACTTTTGACAATTTCGTCTTGATTCGCTTGACGCTGCTG	722.24	1629.57
NCTY_N4871	CTAGCATATCAAAATCACGTATTGACTATGACATTCGTCTTGATTCGCTTGACGCTGCTG	82.5889	1782.62
NCTY_N4888	CTAGCTCTGTTTAGTCACATGATTCTTTCCCAATTCGTCTTGATTCGCTTGACGCTGCTG	34054.1	2369.69
NCTY_N489	CTAGCGTCGTTTGCTTACGTGATTGTCATGTGCTTCGTCTTGATTCGCTTGACGCTGCTG	3790.97	3354.33
NCTY_N4900	GAACTCCCCCTAAATCTCGTGATTAGAGTTTCATAGGTCTTGATTCGCTTGACGCTGCTG	9646.23	1863.24
NCTY_N4902	GAACTTTCATCAATTCACGTTATTTTGCCGCCGTAGGTCTTGATTCGCTTGACGCTGCTG	136.576	1827.96
NCTY_N4909	GAACAAGATCAACGTCACGTCATAGTCAACTTCTAGGTCTTGATTCGCTTGACGCTGCTG	169.416	1714.53
NCTY_N4915	GAAATGCAGAAAATGTACGTGATAGTTAAGCTTTAGGTCTTGATTCGCTTGACGCTGCTG	100.775	2117.75
NCTY_N4924	GAATTACTTATATATCACCTGCCGTCTCAGACGTAGGTCTTGATTCGCTTGACGCTGCTG	404.829	1525.73
NCTY_N4952	GAACCAACATTATTAATCGTGACTAATATAACATAGGTCTTGATTCGCTTGACGCTGCTG	672.162	1711.32
NCTY_N4980	CTATAGTATATACGTCACGAATACAGGAACACCTTCGTCTTGATTCGCTTGACGCTGCTG	162.391	2129.36
NCTY_N4984	CTAAGAGACTACGCAGACGTGACGGTCATCTAGTTCGTCTTGATTCGCTTGACGCTGCTG	121.502	1272.55
NCTY_N4990	GAACACCAATGCAGTCACATGTTTATGAGAACATAGGTCTTGATTCGCTTGACGCTGCTG	16441.3	4676.19
NCTY_N5002	CTAAAGATTCTTGTTCATGTGATACAGCTTTTCTTCGTCTTGATTCGCTTGACGCTGCTG	12830.2	1759.83
NCTY_N5003	CTAATCAGAACTAAATGCGTGATCGGAAGTAATTTCGTCTTGATTCGCTTGACGCTGCTG	381.415	1962.23
NCTY_N5024	CTACTTTTTTTTTCTTGCGTGATCCTGCACTATTTCGTCTTGATTCGCTTGACGCTGCTG	148.095	1715.1
NCTY_N5071	CTAAATATTTTACTTCACGTTATATTCTTTTTTTTCGTCTTGATTCGCTTGACGCTGCTG	201.18	1786.68
NCTY_N5072	GAAGTTATCAATTATAACGTGAAAGGTTTTGCATAGGTCTTGATTCGCTTGACGCTGCTG	190.422	1998.5
NCTY_N508	CTACTCGGTGAAAATCACGAAAAACTTGACACTTTCGTCTTGATTCGCTTGACGCTGCTG	73.9562	1184.48
NCTY_N5134	CTACCGTCCTCTACTCATGTGATTCGAACTATGTTCGTCTTGATTCGCTTGACGCTGCTG	3057.47	1633.04
NCTY_N5144	CTATAAATAAGCCTCGTCGTGATGAACTTAAATTTCGTCTTGATTCGCTTGACGCTGCTG	105.962	1430.08
NCTY_N5161	CTATATTGAGTTTGCCACATGAGCGGTATACGATTCGTCTTGATTCGCTTGACGCTGCTG	107.052	2240.61
NCTY_N5162	CTATCCACAAGATATTGCGTGACAATTACTATTTTCGTCTTGATTCGCTTGACGCTGCTG	198.866	1729.59
NCTY_N517	GAATTTCTATTCGATCACGAGCTCTACTGCTGGTAGGTCTTGATTCGCTTGACGCTGCTG	2690.54	2535
NCTY_N5172	GAATTTTTATGTCCTCACGTTACACCGCATGTGTAGGTCTTGATTCGCTTGACGCTGCTG	539.1	3989.7
NCTY_N520	CTAAATATAGTGTGTCACGCATACAATAATTGATTCGTCTTGATTCGCTTGACGCTGCTG	1797.19	3322.08
NCTY_N5220	CTAATTAGCTATAGTCACGTTTCGCGTTGAAACTTCGTCTTGATTCGCTTGACGCTGCTG	8346.32	5069.23
NCTY_N5224	CTATCTCGACTATTTTGCGTGACACTTCCTTAGTTCGTCTTGATTCGCTTGACGCTGCTG	106.479	1859.44
NCTY_N5265	GAAATCACAAAAAGTCACCTGATGGACCTTATGTAGGTCTTGATTCGCTTGACGCTGCTG	11706.9	1375.72
NCTY_N5267	CTAAGCTTCAATAAATGCGTGACTGGCTATAGTTTCGTCTTGATTCGCTTGACGCTGCTG	509.464	2269.16
NCTY_N5273	GAAACTTTCGGAAATCACGCAAATATTATGCACTAGGTCTTGATTCGCTTGACGCTGCTG	123.191	2015.18
NCTY_N5288	GAAAAACTACATTATCTCGTGAAGAATATTTAATAGGTCTTGATTCGCTTGACGCTGCTG	270.979	1736.89
NCTY_N5309	CTATAGGTATACAGTCACGACTATAATATCATATTCGTCTTGATTCGCTTGACGCTGCTG	409.491	2022.62
NCTY_N5319	CTAGGTAAACCGAGTCACGAAGCTCAATCTTTTTTCGTCTTGATTCGCTTGACGCTGCTG	149.469	1376.67
NCTY_N5333	GAATTAGTATAAAGTCACGCAAACGGATCTCTGTAGGTCTTGATTCGCTTGACGCTGCTG	241.95	1624.46
NCTY_N5357	GAAACAAATTTTGCTAGCGTGACTCTTTATTACTAGGTCTTGATTCGCTTGACGCTGCTG	2809.12	1600.87
NCTY_N5359	CTAAGACCCTCCTATCACGCTCATAATATCATGTTCGTCTTGATTCGCTTGACGCTGCTG	143.294	1622.7
NCTY_N5365	GAATAGAAACATTATCACGCACTGCGTTTTGCTTAGGTCTTGATTCGCTTGACGCTGCTG	159.622	2482.54
NCTY_N5382	GAATAATTCAGCCGTCACGCATGAACAGAAGGATAGGTCTTGATTCGCTTGACGCTGCTG	182.962	2190.99
NCTY_N5401	GAAGCTGTTTCTAATCACGTCTATCTAATTCATTAGGTCTTGATTCGCTTGACGCTGCTG	407.244	1738.42
NCTY_N5437	CTAAAATGCCAAGAATGCGTGACGGTTTCCCTCTTCGTCTTGATTCGCTTGACGCTGCTG	85.0611	1727.85
NCTY_N5439	CTAAAAATAATCTCTCACGTTATACGCAATAAATTCGTCTTGATTCGCTTGACGCTGCTG	710.757	1955.8
NCTY_N5456	GAAAAACCTGCAATACTCGTGATGAATATTTAATAGGTCTTGATTCGCTTGACGCTGCTG	4742.53	2523.29
NCTY_N5460	CTACACCAATGTTGCAGCGTGATTTAATTTTGATTCGTCTTGATTCGCTTGACGCTGCTG	1046.59	2445.48
NCTY_N5472	GAAATACCACAAAAGCAGGTGACAGCAATTGTGTAGGTCTTGATTCGCTTGACGCTGCTG	2607.38	1647.7
NCTY_N5478	GAATCTACTTTTGATCACGTCTCTATCTAATGATAGGTCTTGATTCGCTTGACGCTGCTG	1146.09	1787.6
NCTY_N5503	CTACGGACGGATTATCACGCAAGTTTTTTAACGTTCGTCTTGATTCGCTTGACGCTGCTG	84.2448	1712.98
NCTY_N5516	GAATTTTTTTGCAGTCATGTGAATTTTCCGACTTAGGTCTTGATTCGCTTGACGCTGCTG	7795.03	1769.66
NCTY_N5545	GAAATCACGCTTCATCACCTGAGAAAAGTAACATAGGTCTTGATTCGCTTGACGCTGCTG	1147.74	1610.62
NCTY_N5569	CTAAGCAAAACTGTTGTCGTGATTTATTTAAATTTCGTCTTGATTCGCTTGACGCTGCTG	151.469	1604.56
NCTY_N5570	GAATAAACGGCAACCTGCGTGATAAAAACTATCTAGGTCTTGATTCGCTTGACGCTGCTG	141.402	1843.12
NCTY_N5583	CTAAATATGTACGGTCACGCCAATTCTTTTTCTTTCGTCTTGATTCGCTTGACGCTGCTG	951.455	1847.53
NCTY_N5584	GAATCAGGTCCGGGTCACACCACTACCCTTACTTAGGTCTTGATTCGCTTGACGCTGCTG	482.119	1404.38
NCTY_N5602	CTATAGTGAATATATCACGAGTTACAATAGAGTTTCGTCTTGATTCGCTTGACGCTGCTG	3212.99	2256.86
NCTY_N5620	CTAAACGTTGCCTTTGTCGTGATTTTGTGCGAGTTCGTCTTGATTCGCTTGACGCTGCTG	113.038	1808.02
NCTY_N5631	GAATCGACTAGTATTCACGTTACTAGTATATTCTAGGTCTTGATTCGCTTGACGCTGCTG	658.338	1927.39
NCTY_N5644	GAATCAAGGCATGGCCGCGTGATGGCATTGCACTAGGTCTTGATTCGCTTGACGCTGCTG	275.433	2076.13
NCTY_N5645	GAAAGATATTTTTTCTTCGTGATTTTCTAGTCCTAGGTCTTGATTCGCTTGACGCTGCTG	110.712	1393.97
NCTY_N5650	GAACCGAGCGAGAATCACGTAAAGAAGGTTCTATAGGTCTTGATTCGCTTGACGCTGCTG	80.6462	1129.37
NCTY_N5659	CTACTGGTCCAAGAAGACGTGATTTACAAGACATTCGTCTTGATTCGCTTGACGCTGCTG	136.182	1485.29
NCTY_N5667	GAAGTATTGAATGTTTTCGTGATGCTTTATTGATAGGTCTTGATTCGCTTGACGCTGCTG	89.4934	1569.5
NCTY_N5683	CTAGTCGCTGATAAAATCGTGATTCTCGATCAATTCGTCTTGATTCGCTTGACGCTGCTG	67.0175	1590.27
NCTY_N5686	CTAGATAATCTACATCATGTGGTACGTTAACGATTCGTCTTGATTCGCTTGACGCTGCTG	3089.06	3312.13
NCTY_N5689	GAAGGTGCGAAATTTTACGTGATTCATTTTCTTTAGGTCTTGATTCGCTTGACGCTGCTG	132.891	1757.76
NCTY_N5692	CTATTTGTGGCCGATCACGCTAAAGATTAGGCATTCGTCTTGATTCGCTTGACGCTGCTG	125.667	1399.88
NCTY_N570	GAATTCTCCTCAGTTCACATGATAAAGATACTTTAGGTCTTGATTCGCTTGACGCTGCTG	925.586	1426.19
NCTY_N5739	CTAAAAGGTGCCAGTGACGTGATGGTTACGCCTTTCGTCTTGATTCGCTTGACGCTGCTG	103.073	1370.97
NCTY_N5758	GAATTGTTCCAAAATATCGTGATATTTGAAAGTTAGGTCTTGATTCGCTTGACGCTGCTG	164.489	1218.58
NCTY_N577	GAAATACAGAGGCTTCATGTGACCGGAGAAAGGTAGGTCTTGATTCGCTTGACGCTGCTG	10640.5	1338.15
NCTY_N5788	GAATTCCGAGATCATCACGGGATTTGTCACGCATAGGTCTTGATTCGCTTGACGCTGCTG	5628.29	2315.13
NCTY_N5789	GAACCGCGGTCGTGCTGCGTGATCAGCTACATGTAGGTCTTGATTCGCTTGACGCTGCTG	584.495	3003.74
NCTY_N5790	GAACTCCCAAAATATCAGCTGACGTTTTCATATTAGGTCTTGATTCGCTTGACGCTGCTG	4940.04	1423.96
NCTY_N5812	GAACTCATATGAGTTCATGTGATATTTCATGTTTAGGTCTTGATTCGCTTGACGCTGCTG	1943.26	2031.08
NCTY_N5826	CTACACAAAGCATGTCACGTCATGTAGCTGATCTTCGTCTTGATTCGCTTGACGCTGCTG	420.72	2749.94
NCTY_N5844	GAATTACATAGGCATCACGAAAAAAAGTCGCATTAGGTCTTGATTCGCTTGACGCTGCTG	69.7085	1367.59
NCTY_N5861	GAAAGGTTTATATTCGACGTGATTTTTTTTTCTTAGGTCTTGATTCGCTTGACGCTGCTG	327.364	2047.54
NCTY_N5869	CTAAGCTTTTCTATTCATGTGATACATCGCCTTTTCGTCTTGATTCGCTTGACGCTGCTG	1690.82	1728.27
NCTY_N5883	CTACTGTATTTCTATCACGTATCCTTCTAGGTTTTCGTCTTGATTCGCTTGACGCTGCTG	198.857	2032.83
NCTY_N589	GAAAATTATTTCTTTCACATGATTAAAATTATATAGGTCTTGATTCGCTTGACGCTGCTG	14644.8	1619.26
NCTY_N5894	GAATTATCTGTATGTCACGAGGCATTTTTCATTTAGGTCTTGATTCGCTTGACGCTGCTG	9793.64	4693.5
NCTY_N5917	GAATTCCTGTTTTTTGACGTGATATACTCAAAGTAGGTCTTGATTCGCTTGACGCTGCTG	95.5095	1417.38
NCTY_N5918	GAAGAAAATCTAAATGTCGTGATGTATAACTTGTAGGTCTTGATTCGCTTGACGCTGCTG	287.379	1726.81
NCTY_N5931	CTAAAACAACAAAGCCATGTGATATCAGTCATTTTCGTCTTGATTCGCTTGACGCTGCTG	5561.56	3672.94
NCTY_N5934	CTAAAGCCTAAGTATCACGCTAATTGAAGTTTTTTCGTCTTGATTCGCTTGACGCTGCTG	77.8984	1650.63
NCTY_N5939	GAATACTCTATACATCACGAAGTCTACGGCAACTAGGTCTTGATTCGCTTGACGCTGCTG	89.5329	1605.1
NCTY_N5943	GAATCAGTTCAAGTTCAGCTGATCTAAGTAGCTTAGGTCTTGATTCGCTTGACGCTGCTG	205.493	1039.07
NCTY_N5953	CTAAGTAGAGAGAATCACGATCTAAATAATAATTTCGTCTTGATTCGCTTGACGCTGCTG	125.35	1230.35
NCTY_N597	GAAGATAGTTTTTTTATCGTGATGAAGTGTTGGTAGGTCTTGATTCGCTTGACGCTGCTG	142.097	1326.1
NCTY_N5981	GAAATATGTAATAGACATGTGATACATTTTTATTAGGTCTTGATTCGCTTGACGCTGCTG	8862.86	4700.14
NCTY_N5985	GAACAAAACATAGTTTGCGTGATAACAGCGTGTTAGGTCTTGATTCGCTTGACGCTGCTG	131.411	2677.37
NCTY_N6000	GAATTTTTTTTTCATCACGCAAAGGAAATACAATAGGTCTTGATTCGCTTGACGCTGCTG	219.099	1659.82
NCTY_N6006	GAACGCGTCAATAAACACATGATGAGTATGTGTTAGGTCTTGATTCGCTTGACGCTGCTG	721.595	2962.85
NCTY_N6012	GAAGAAAACAAACTTGGCGTGACTTGGCGTGGATAGGTCTTGATTCGCTTGACGCTGCTG	478.182	1714.87
NCTY_N6013	GAACGAATAGTTCGTCAGGTGCCAGCACTGAGATAGGTCTTGATTCGCTTGACGCTGCTG	2118.5	1478.94
NCTY_N6022	CTACGCGATGTTGCAAGCGTGACAGATCTATACTTCGTCTTGATTCGCTTGACGCTGCTG	271.379	1837.77
NCTY_N6032	GAAAACCTCATTCGTCATGTGAGAGATGCATGCTAGGTCTTGATTCGCTTGACGCTGCTG	3418.9	3199.24
NCTY_N6045	GAAGAATCCGCTTGGCGCGTGATTGAGCCAATGTAGGTCTTGATTCGCTTGACGCTGCTG	446.237	2086.19
NCTY_N6046	CTACTCTATTTTGATCACGCATGCAATTGCACATTCGTCTTGATTCGCTTGACGCTGCTG	3296.01	3532.23
NCTY_N6050	CTACGATTGGTTTATCACGTAAGTTTCTTATGATTCGTCTTGATTCGCTTGACGCTGCTG	98.1985	1530.64
NCTY_N6052	GAATCTGTTTCTGGTTGCGTGATTTTTCTTTAGTAGGTCTTGATTCGCTTGACGCTGCTG	337.025	1873.03
NCTY_N6068	GAAGCTTTAAAAAATCACGCTCTGTGGTGCTAATAGGTCTTGATTCGCTTGACGCTGCTG	338.209	1432.18
NCTY_N6073	CTATTTTGGCTTCATCACGCTCGTCAGTTGAGCTTCGTCTTGATTCGCTTGACGCTGCTG	57.1283	1350.06
NCTY_N6078	GAATCTGGAGTAATTCTCGTGATCTTGTTTAATTAGGTCTTGATTCGCTTGACGCTGCTG	3352.05	2347.57
NCTY_N6093	CTATGTAGTAAAAAAATCGTGATGTATACAAACTTCGTCTTGATTCGCTTGACGCTGCTG	159.431	1891.31
NCTY_N6117	GAAATTTCTTCCCCTCTCGTGATTTCTAGATAATAGGTCTTGATTCGCTTGACGCTGCTG	965.019	1614.59
NCTY_N6119	CTAGCGCGTGAACATCACGACGCGCCTTCCCGTTTCGTCTTGATTCGCTTGACGCTGCTG	390.082	2273.7
NCTY_N6125	CTACGCTATTCGGATGACGTGATGACGCTTCGGTTCGTCTTGATTCGCTTGACGCTGCTG	192.157	1583.79
NCTY_N6140	CTAAACGAGCTAGATCATGTGAGAGAGATAGTATTCGTCTTGATTCGCTTGACGCTGCTG	10019.4	1700.82
NCTY_N6184	CTAGGCAACACTAATCACGCAACGCTAGAACTCTTCGTCTTGATTCGCTTGACGCTGCTG	51.0553	1612.79
NCTY_N6185	CTACCAACAAAGCATCACGCTGTCGTATCTCAATTCGTCTTGATTCGCTTGACGCTGCTG	209.06	2165.93
NCTY_N619	CTACCCCACTTCCATCACGTCCATACCAGGTGCTTCGTCTTGATTCGCTTGACGCTGCTG	127.246	1891.21
NCTY_N6207	CTATACTATCCGTGAAGCGTGACCGGCCCTTCTTTCGTCTTGATTCGCTTGACGCTGCTG	1981.23	1945.69
NCTY_N6224	GAAGTATAGATGAATCACGCTTGATTTGATGGATAGGTCTTGATTCGCTTGACGCTGCTG	185.09	1655.52
NCTY_N6225	CTACCCTATACTATTCATGTGAGTGGTAGCATGTTCGTCTTGATTCGCTTGACGCTGCTG	133.693	2463.8
NCTY_N6237	CTATTTCACAAAAAACATGTGATATGCTTTCAATTCGTCTTGATTCGCTTGACGCTGCTG	8433.33	3363.49
NCTY_N6242	CTACGAATGTTGAATCACGCCAGAATCACCAAATTCGTCTTGATTCGCTTGACGCTGCTG	112.667	1485.53
NCTY_N6248	CTAAAATATTTATGTCACGTAGCGAGCTTACTTTTCGTCTTGATTCGCTTGACGCTGCTG	1226.83	2137.03
NCTY_N6272	CTAGAGACATGATCGGTCGTGATTATCTTGTTGTTCGTCTTGATTCGCTTGACGCTGCTG	128.13	1689.97
NCTY_N6317	GAAACGACTTGAACTTACGTGATTATATGTATATAGGTCTTGATTCGCTTGACGCTGCTG	125.798	1835.88
NCTY_N6318	CTAACATGTGTTAATCACGCGTTGATACAATGTTTCGTCTTGATTCGCTTGACGCTGCTG	2588.05	4995.31
NCTY_N6326	CTATGGCTCAGTAACCTCGTGATAGAAAAAGGGTTCGTCTTGATTCGCTTGACGCTGCTG	9383.97	4318.9
NCTY_N6341	CTAGTTAATATTGATCACGAGAATAACAGATCTTTCGTCTTGATTCGCTTGACGCTGCTG	12376.5	1894.27
NCTY_N6342	CTATCATGAACGGTTTACGTGACTATTTTCACTTTCGTCTTGATTCGCTTGACGCTGCTG	318.831	1651.1
NCTY_N6343	GAATTCATGATGTGCCACATGAGTACAGCCGATTAGGTCTTGATTCGCTTGACGCTGCTG	126.859	2535.5
NCTY_N6350	CTAAATAACAAAAATCACGAAAAAAAAAAGCTTTTCGTCTTGATTCGCTTGACGCTGCTG	140.199	1522.78
NCTY_N6379	CTAAAAAGTGCGCATCACGATTTATCATCCTTCTTCGTCTTGATTCGCTTGACGCTGCTG	107.795	1724.34
NCTY_N6383	CTATCAAAGAAAAATCACGAATTGAATAAGCTTTTCGTCTTGATTCGCTTGACGCTGCTG	56.9849	1177.61
NCTY_N6400	GAATTATTTACAATTTTCGTGATTCTGTGTAAATAGGTCTTGATTCGCTTGACGCTGCTG	171.639	1580.29
NCTY_N6410	GAATGTAACAGTAATCACGAATAGCAGCAGATTTAGGTCTTGATTCGCTTGACGCTGCTG	87.0516	1592.17
NCTY_N6454	CTAAGGGATTAGAATCACGTAAGACTCTTGATCTTCGTCTTGATTCGCTTGACGCTGCTG	90.8032	1006.45
NCTY_N6461	CTACTATTTTTCTATCACGTAAGTTGACATTTGTTCGTCTTGATTCGCTTGACGCTGCTG	151.677	1876.71
NCTY_N6463	GAACCACCAGATTATCACGCTATAAATTTTAAATAGGTCTTGATTCGCTTGACGCTGCTG	177.186	1635.22
NCTY_N6464	GAATATTCCTGATATCACGAGCTTGTCTTATAGTAGGTCTTGATTCGCTTGACGCTGCTG	1268.78	2409.87
NCTY_N6476	GAAGGGTCAACAGATCACGAGCCAATTTGAATTTAGGTCTTGATTCGCTTGACGCTGCTG	4966.68	2191.51
NCTY_N6521	GAACCCTGCCAATTAGACGTGATGAAAAATATTTAGGTCTTGATTCGCTTGACGCTGCTG	151.533	1545.69
NCTY_N6533	CTAAATAAATCTGCTTACGTGACATTTTTTACTTTCGTCTTGATTCGCTTGACGCTGCTG	520.135	2005.44
NCTY_N6538	GAAGATGCATCTTTTCACATGGTCCACTGTTTTTAGGTCTTGATTCGCTTGACGCTGCTG	164.164	2272.78
NCTY_N6554	CTACTTGCTATAGATCACGCACCCTTTTGGCAATTCGTCTTGATTCGCTTGACGCTGCTG	1167.67	2540.29
NCTY_N6583	CTACATTCAGTGCGTCACGACGCGAATAGGGCTTTCGTCTTGATTCGCTTGACGCTGCTG	173.194	1961.69
NCTY_N6585	CTAGCCTTCCCGTCGCGCGTGATTTGGAGATACTTCGTCTTGATTCGCTTGACGCTGCTG	713.563	2318.11
NCTY_N6597	CTATTTGTTTCGTACTTCGTGACTGTTTGGCATTTCGTCTTGATTCGCTTGACGCTGCTG	186.329	1725.09
NCTY_N6598	CTAAGGTAGTTGGGTCAGCTGAAGTAGTTGGGTTTCGTCTTGATTCGCTTGACGCTGCTG	140.253	1443.59
NCTY_N6605	CTAGCCGATTCTAATCATGTGACTCCTTTTCCCTTCGTCTTGATTCGCTTGACGCTGCTG	32298.8	2137.31
NCTY_N6630	CTACCCTGGTTTGGTCACGCAAAACCGAAAGGCTTCGTCTTGATTCGCTTGACGCTGCTG	139.404	1282.87
NCTY_N6649	GAACTACACCTGACTCACATGACAGCATTTCCTTAGGTCTTGATTCGCTTGACGCTGCTG	9216.39	2659.68
NCTY_N6653	CTATATTATATATGCCACATGACTGCAGGGTCCTTCGTCTTGATTCGCTTGACGCTGCTG	4799.57	3019.79
NCTY_N6675	GAACGAGTAGGCTATCACGTATGCATGGAACGTTAGGTCTTGATTCGCTTGACGCTGCTG	108.687	2464.96
NCTY_N6679	CTATTCCGAGATCCTCAGCTGACAAATAAATGTTTCGTCTTGATTCGCTTGACGCTGCTG	883.085	1633.55
NCTY_N670	GAATATGAGCCTGATAACGTGAGTCATTCGTTTTAGGTCTTGATTCGCTTGACGCTGCTG	320.008	2062.89
NCTY_N6721	GAAACGTTAATGTCTCATGTGACTGAGCTGCAGTAGGTCTTGATTCGCTTGACGCTGCTG	10756.1	1678.34
NCTY_N6737	GAAGATGTGTTTTATCACGAGGCCCAATCGAAATAGGTCTTGATTCGCTTGACGCTGCTG	1762.12	3145.06
NCTY_N6742	CTACTTCAATAAAGTCACGCGTAGTTAAAATATTTCGTCTTGATTCGCTTGACGCTGCTG	9091.65	3274.94
NCTY_N6748	CTAAATGGCACTAATCACCTGCCTTCTGTTGACTTCGTCTTGATTCGCTTGACGCTGCTG	358.833	1479.23
NCTY_N6758	CTAAAAACCGCGCGTCACGAAAAAGCAGGAAGCTTCGTCTTGATTCGCTTGACGCTGCTG	75.7955	1495.21
NCTY_N677	CTAAACCCCCGGTATCACGCGGCACTAAAGTTGTTCGTCTTGATTCGCTTGACGCTGCTG	596.898	3114.91
NCTY_N6787	CTACGCTTTACGGGTCACGCGCGGATTTTGACTTTCGTCTTGATTCGCTTGACGCTGCTG	13033.8	2947.66
NCTY_N680	CTACCGATTAAAGTGGTCGTGATTCAGTATTTTTTCGTCTTGATTCGCTTGACGCTGCTG	304.152	1692.15
NCTY_N6829	CTATGTGCCACATATCACGTAATCATATATTGTTTCGTCTTGATTCGCTTGACGCTGCTG	403.49	2198.02
NCTY_N6868	CTAGTGGTATAGGCTCACGCGGCCTGGCCGGAATTCGTCTTGATTCGCTTGACGCTGCTG	92.022	2008.04
NCTY_N6876	GAATGCCGGTGAGATCACGAGTAGCAGAAGAAATAGGTCTTGATTCGCTTGACGCTGCTG	3333.79	1677.37
NCTY_N6891	CTAATTTTTTCTTATTGCGTGACCGCAATGAAATTCGTCTTGATTCGCTTGACGCTGCTG	2145.57	1720.19
NCTY_N6910	GAAGAAAGGAGACGTCACGTCACTTAGGCAAGATAGGTCTTGATTCGCTTGACGCTGCTG	210.76	1667.85
NCTY_N6923	GAAATGAATACTGATCATGTGAAACATGATTAATAGGTCTTGATTCGCTTGACGCTGCTG	12419.1	2141.84
NCTY_N6938	CTAGCACCCTTTGGACTCGTGATTCCGTGGAAATTCGTCTTGATTCGCTTGACGCTGCTG	1300.37	1668.21
NCTY_N694	GAAGTTAGACAAAATCACGCTTTTTCATTGGGATAGGTCTTGATTCGCTTGACGCTGCTG	323.586	1738.75
NCTY_N6940	GAATATTAGAAGGATCAGCTGAAACCTAAAGATTAGGTCTTGATTCGCTTGACGCTGCTG	101.762	1097.29
NCTY_N695	CTATTGAATAGTAGTCACATGATCGTTGATTATTTCGTCTTGATTCGCTTGACGCTGCTG	37275.2	2597.4
NCTY_N6951	CTAGTGATACCGCGTCACATGACCATTTAAAAGTTCGTCTTGATTCGCTTGACGCTGCTG	70696.8	2606.95
NCTY_N6952	GAAATGCTAAAATATGGCGTGACCGTAATAACATAGGTCTTGATTCGCTTGACGCTGCTG	9287.95	2012.79
NCTY_N6972	GAAGATCTTTTCCATCACGCTAACACATGATAATAGGTCTTGATTCGCTTGACGCTGCTG	1254.43	2139
NCTY_N6973	GAACAAGATTATGTTCTCGTGATTGACAACTTATAGGTCTTGATTCGCTTGACGCTGCTG	2427.44	1586.56
NCTY_N6989	CTATTTTCCCATTGTCACGAGAACATAATTGTTTTCGTCTTGATTCGCTTGACGCTGCTG	6218.59	2333.68
NCTY_N7	GAAATTTTTGTCCATATCGTGATAATTTTTTTGTAGGTCTTGATTCGCTTGACGCTGCTG	189.197	1806.24
NCTY_N7011	GAAACTCATTAAAGCCACCTGACTCAAGTCTTCTAGGTCTTGATTCGCTTGACGCTGCTG	3413.63	1223.75
NCTY_N7022	GAAAGGCAAAAAAGTTTCGTGACTGAACTTCTTTAGGTCTTGATTCGCTTGACGCTGCTG	93.1316	1322.8
NCTY_N7051	CTACAAAAAATGAGTCACGCACGCACAATCACGTTCGTCTTGATTCGCTTGACGCTGCTG	2410.1	5549.95
NCTY_N7053	GAACTAAAAAGATGTTTCGTGATTCTCCTAGTATAGGTCTTGATTCGCTTGACGCTGCTG	73.9167	1428.93
NCTY_N7064	GAAAAAAGATCTCATAGCGTGACATCCGTATATTAGGTCTTGATTCGCTTGACGCTGCTG	660.735	2009.23
NCTY_N7066	GAAATGCACATCAGCCTCGTGACAGATGAGGATTAGGTCTTGATTCGCTTGACGCTGCTG	4219.22	3731.45
NCTY_N707	GAACCGAGAACGCGTAGCGTGATGATAATGGTGTAGGTCTTGATTCGCTTGACGCTGCTG	197.586	1704.4
NCTY_N71	GAAATTTGAGCTATTTACGTGACTTCATCTTAGTAGGTCTTGATTCGCTTGACGCTGCTG	358.386	1827.81
NCTY_N7102	GAAGACTGTGGTGCTTACGTGATAACAAACAACTAGGTCTTGATTCGCTTGACGCTGCTG	187.163	1144.56
NCTY_N7112	GAATTTGCTTGTTCTTTCGTGATTACGAAACCCTAGGTCTTGATTCGCTTGACGCTGCTG	33.1486	1247.24
NCTY_N7119	GAACAAAAATTTTATCACGCTCGAGGTTAGAAGTAGGTCTTGATTCGCTTGACGCTGCTG	130.798	1918.53
NCTY_N7126	CTAACATAAAGGAAGCGCGTGATGTATCAGTAATTCGTCTTGATTCGCTTGACGCTGCTG	1929.49	3969.83
NCTY_N7133	GAAGAAAAAACTTCTCAGCTGACTCCACCATATTAGGTCTTGATTCGCTTGACGCTGCTG	482.522	1770.72
NCTY_N7136	CTAAAACCGCCCAATCACGCTGACCCCTTTGGCTTCGTCTTGATTCGCTTGACGCTGCTG	506.719	1814.29
NCTY_N7138	CTAATACACTTTTATCATGTGAAGATTGAAAGGTTCGTCTTGATTCGCTTGACGCTGCTG	285.38	1681.7
NCTY_N7146	CTATCCCGCAGTCCTGGCGTGATAAGCCACTGCTTCGTCTTGATTCGCTTGACGCTGCTG	118.603	1202
NCTY_N7148	CTACTCTCAAATTCTCACGAGATTATTTGACTTTTCGTCTTGATTCGCTTGACGCTGCTG	306.581	1430.64
NCTY_N7155	GAAGTCTTAATGAGTCACGGGAGGTCAAGATGCTAGGTCTTGATTCGCTTGACGCTGCTG	6737.52	1971.74
NCTY_N7165	GAAAACAATTGAAGAGACGTGACTAATGCTATGTAGGTCTTGATTCGCTTGACGCTGCTG	544.317	2301.04
NCTY_N7168	GAATGCGGAAGCTATCACGCGATAACTAGGTACTAGGTCTTGATTCGCTTGACGCTGCTG	815.667	2549.35
NCTY_N7173	GAACGAAATTTTCATCACGCTGTAGGACGCAAATAGGTCTTGATTCGCTTGACGCTGCTG	402.193	1893.32
NCTY_N72	CTAAATAACCTAATTCACGTTACCCACCTTTTTTTCGTCTTGATTCGCTTGACGCTGCTG	495.165	2630.98
NCTY_N7210	GAAGCTTGTAAACATTTCGTGACTGCCCTCGAATAGGTCTTGATTCGCTTGACGCTGCTG	107.313	1154.03
NCTY_N7234	GAAGGAGAAAATAAACGCGTGAGCAGTAGCTGATAGGTCTTGATTCGCTTGACGCTGCTG	186.982	3084.14
NCTY_N7276	CTAACGCAATATTTCTACGTGATATCTATAAAATTCGTCTTGATTCGCTTGACGCTGCTG	309.534	1832.76
NCTY_N7294	GAATCTCTAAAAGGGAGCGTGATAGATAAAGCATAGGTCTTGATTCGCTTGACGCTGCTG	475.038	1586.18
NCTY_N7310	GAAAAGTGTTTTACCTACGTGACAGTAAGAGTATAGGTCTTGATTCGCTTGACGCTGCTG	333.022	2505.38
NCTY_N7312	GAACTTCTTGCTCATCACGATAATTATACTATTTAGGTCTTGATTCGCTTGACGCTGCTG	85.7628	1212.69
NCTY_N7319	GAAGTTGAATAAGGCCATGTGACACGGGTTTCTTAGGTCTTGATTCGCTTGACGCTGCTG	18770	5428.52
NCTY_N7326	GAAAATATTTATCGTCACGAATAAATCCCGTGATAGGTCTTGATTCGCTTGACGCTGCTG	12637.1	1816.43
NCTY_N7334	CTAAGGCCATATTATCACGTAACAAACCTAATTTTCGTCTTGATTCGCTTGACGCTGCTG	93.6871	1747.45
NCTY_N7335	CTAGCACTATCATCATGCGTGATTGATATTTAATTCGTCTTGATTCGCTTGACGCTGCTG	722.077	2394.29
NCTY_N7346	GAATCTAACAAAAATCATGTGAAAAATCATGTGTAGGTCTTGATTCGCTTGACGCTGCTG	882.353	2405.81
NCTY_N7351	GAAGGAAAGATTACCCACCTGATATGCGTTAATTAGGTCTTGATTCGCTTGACGCTGCTG	417.185	2408.33
NCTY_N7353	GAATAATGTACTAGTAACGTGAATACTAGTCCATAGGTCTTGATTCGCTTGACGCTGCTG	171.481	2182.16
NCTY_N7368	CTAGTCTATCTTATAGGCGTGATAGATGTCATTTTCGTCTTGATTCGCTTGACGCTGCTG	138.34	1436.9
NCTY_N738	GAAATAATACTTATCAGCGTGATTGGATTGTAGTAGGTCTTGATTCGCTTGACGCTGCTG	597.518	2023.4
NCTY_N7391	CTAATTATATACACCCACATGATTCTATAGACATTCGTCTTGATTCGCTTGACGCTGCTG	908.006	3825.31
NCTY_N740	CTATCTTTGAAAAATCACGAGATGGTGCATATTTTCGTCTTGATTCGCTTGACGCTGCTG	3796.15	2168.98
NCTY_N7401	CTATTGTACAGTTTTCACATGACGATTGGAAATTTCGTCTTGATTCGCTTGACGCTGCTG	669.078	1765.47
NCTY_N7402	GAAAATGATTATGGGTGCGTGATCACCAATCTGTAGGTCTTGATTCGCTTGACGCTGCTG	5478.81	2939.07
NCTY_N743	GAAGTAACAGAACATCACGCTACAATCTTAATCTAGGTCTTGATTCGCTTGACGCTGCTG	290.581	1672.09
NCTY_N7431	CTATCAAAATTAAATCACGCTGCAACATTGGTGTTCGTCTTGATTCGCTTGACGCTGCTG	1128.62	2210.58
NCTY_N7434	CTACGCGTTATTTTTCGCGTGACATAATAGAAATTCGTCTTGATTCGCTTGACGCTGCTG	2318.35	2136.55
NCTY_N7436	CTATTTTTTCAGCATCACGAAGAAAAAAAGCTTTTCGTCTTGATTCGCTTGACGCTGCTG	113.816	1161.97
NCTY_N7438	CTACTAGTATTCAATCACGTAAGGTGGAAGAGATTCGTCTTGATTCGCTTGACGCTGCTG	334.225	1338.34
NCTY_N7443	GAAATCCTGCGCGATCACGTAACATGCTATGAATAGGTCTTGATTCGCTTGACGCTGCTG	381.148	2091.73
NCTY_N7470	GAACGTTGGTGTGCCGACGTGATACAGAGCGGTTAGGTCTTGATTCGCTTGACGCTGCTG	95.4754	2563.52
NCTY_N7485	GAATAAAGTACAGATCACGTAACGGAATGCTACTAGGTCTTGATTCGCTTGACGCTGCTG	364.645	1878.94
NCTY_N7486	CTACAAATATAAGATCACGCTATACTATCAATGTTCGTCTTGATTCGCTTGACGCTGCTG	2936.36	2142.27
NCTY_N750	GAACCTTTCTCCGGTCACATGAAGCCTCTGTATTAGGTCTTGATTCGCTTGACGCTGCTG	10561.1	1405.01
NCTY_N7520	CTAAACTTCTAATGTCACGCAAGAAGTGAAAGTTTCGTCTTGATTCGCTTGACGCTGCTG	132.896	1441.47
NCTY_N7523	GAATAAAGATGAGATCACGCCCAGATTTTGTCTTAGGTCTTGATTCGCTTGACGCTGCTG	591.277	1999.91
NCTY_N772	CTACCTCTCAGCCGTCACGTCTCTAGCTGAAGCTTCGTCTTGATTCGCTTGACGCTGCTG	112.025	1655.85
NCTY_N774	CTACTTGATTAAAGTCACGCTTTCACCAAATATTTCGTCTTGATTCGCTTGACGCTGCTG	8098.39	2210.41
NCTY_N797	CTAGGGAACACCTTACGCGTGAGCTGTGCCCACTTCGTCTTGATTCGCTTGACGCTGCTG	47.3335	1449.03
NCTY_N799	GAAAGCAGAAATATGGACGTGATTCTGAGTTTATAGGTCTTGATTCGCTTGACGCTGCTG	98.4379	1670.21
NCTY_N80	GAAATACGCAACAGTCACGTTATATTCATGCAATAGGTCTTGATTCGCTTGACGCTGCTG	8597.97	3386.84
NCTY_N814	CTACATACTTTCATTGTCGTGATTCTTTAGGCATTCGTCTTGATTCGCTTGACGCTGCTG	146.52	1694.23
NCTY_N847	GAAAAGCATCTACATCACGAATATACGGGATATTAGGTCTTGATTCGCTTGACGCTGCTG	81.22	1495.15
NCTY_N861	CTAGATATGTCTTATTGCGTGATTTCACGGTGTTTCGTCTTGATTCGCTTGACGCTGCTG	88.8248	1636.29
NCTY_N876	CTATTTCGTTCGTGCAGCGTGATTAACCGAGCCTTCGTCTTGATTCGCTTGACGCTGCTG	341.684	2522.76
NCTY_N896	CTAAAAGAAAAAAGTCACGCAAAGTTGCAAACATTCGTCTTGATTCGCTTGACGCTGCTG	301.304	1416.39
NCTY_N897	GAATTAGCCCCTTGTCACGCTGCACGACGCGTATAGGTCTTGATTCGCTTGACGCTGCTG	333.199	2695.89
NCTY_N899	CTAACGTGTTGAAATCACGATACTGGCATCCGATTCGTCTTGATTCGCTTGACGCTGCTG	274.092	2246.54
NCTY_N956	GAACACAGGTCCAATCACGCAGCTTCATTACAGTAGGTCTTGATTCGCTTGACGCTGCTG	103.149	1755.1
NCTY_N973	GAACCCCTGAACAATCAGCTGAGGTCAGAGATCTAGGTCTTGATTCGCTTGACGCTGCTG	68.9329	1275.15
NCTY_N977	CTATCTCCTTGTCGTCATGTGAAAGTCAAACAGTTCGTCTTGATTCGCTTGACGCTGCTG	927.454	1599.82
NCTY_N999	CTACTAATCAAATGTATCGTGACTGGGTGTTGCTTCGTCTTGATTCGCTTGACGCTGCTG	720.775	2084.96
NCT_D1014	CTAAGCACAAACCGTCACATGCCGTTCCGAAATTTCGTCTTGATTCGCTTGACGCTGCTG	3668.61	3270.4
NCT_D1083	CTAGAACCCATACCTCACGTTTGAAATTGACACTTCGTCTTGATTCGCTTGACGCTGCTG	90.6515	2467.91
NCT_D1129	GAAGGGGCACAAATACAGGTGATTCGAGAAATATAGGTCTTGATTCGCTTGACGCTGCTG	233.635	1917.74
NCT_D1370	GAATTCCATCGATGCCATGTGACCTGGTGAATCTAGGTCTTGATTCGCTTGACGCTGCTG	22347.2	3463.92
NCT_D1455	CTACGACCGAATCCACCCGTGATGCCAACTTCATTCGTCTTGATTCGCTTGACGCTGCTG	276.92	1729.29
NCT_D1498	GAATTGCGCTAGCTTCAGCTGATGTGCCATGTATAGGTCTTGATTCGCTTGACGCTGCTG	73.1232	1499.42
NCT_D1549	CTAAAAGAAGAAATAGATTGCTTTGCGTGAAATTTCGTCTTGATTCGCTTGACGCTGCTG	61.0758	1217.02
NCT_D1575	GAAAAGTTCGTGCGTCACCTGCACCAGCATATTTAGGTCTTGATTCGCTTGACGCTGCTG	527.696	2814.02
NCT_D1710	GAAATGACCCTATTGCAGGTGATCCTGATGTAGTAGGTCTTGATTCGCTTGACGCTGCTG	167.659	1474.2
NCT_D1958	CTATTGGAGCAGAGGCACCTGATAATGGAAGCGTTCGTCTTGATTCGCTTGACGCTGCTG	180.864	1534.06
NCT_D1995	CTAAATTGTTTTTATCAGGTGTTTCCCTATTTATTCGTCTTGATTCGCTTGACGCTGCTG	529.545	1769.19
NCT_D2281	GAAGCAATTTGAGATCAGGTGCCCAAGAACTCGTAGGTCTTGATTCGCTTGACGCTGCTG	3917.47	1099.51
NCT_D25	CTAGCGAAGCTTCCTCACATGGAAAAGGCTTCTTTCGTCTTGATTCGCTTGACGCTGCTG	68.9651	1363.65
NCT_D3295	CTATAGTATAAGAATCACATGTTTTCCATTCTTTTCGTCTTGATTCGCTTGACGCTGCTG	13758	3894.97
NCT_D3299	GAACTGTCAAGGTTCCTCGTGACTTTGACGAATTAGGTCTTGATTCGCTTGACGCTGCTG	7351.69	2581.13
NCT_D3380	CTACTTGTAATCGTTCATGTGGCAACTGTTTCATTCGTCTTGATTCGCTTGACGCTGCTG	185.906	2292.05
NCT_D3440	CTAGGAAGGTATCATCACGTAAACTAAAACGCATTCGTCTTGATTCGCTTGACGCTGCTG	109.236	1946.23
NCT_D3495	GAACGGATATTGAATCACATGGGATTTCAGATTTAGGTCTTGATTCGCTTGACGCTGCTG	6301.36	3417.37
NCT_D3895	GAAAATTAGCATATTCACGCGCGACTACCAAACTAGGTCTTGATTCGCTTGACGCTGCTG	139.238	2498.97
NCT_D4296	CTAAGCCAAACTCCCCACCTGACAATGTCTTCATTCGTCTTGATTCGCTTGACGCTGCTG	224.673	1521.01
NCT_D4324	GAATAAAGCAAATCTCACATGAAAACGCTGAAATAGGTCTTGATTCGCTTGACGCTGCTG	106.883	1281.21
NCT_D5114	CTATTTCGAACCCGTCAGGTGCAGGCTTGGATCTTCGTCTTGATTCGCTTGACGCTGCTG	238.706	1286.63
NCT_D5221	CTAATGGGCACTTGTCACATGTTAATGAAGTCATTCGTCTTGATTCGCTTGACGCTGCTG	12210.7	3585.27
NCT_D5429	CTAGGCAGCTCATTACTCGTGACGCAGCTTTAATTCGTCTTGATTCGCTTGACGCTGCTG	1607.4	1904.22
NCT_D5616	GAAATCTCATGGATCCTCGTGAGCAACATTTTCTAGGTCTTGATTCGCTTGACGCTGCTG	348.38	2903.3
NCT_D5705	GAAAAGCAACCACACCACATGAGCTCACAACCGTAGGTCTTGATTCGCTTGACGCTGCTG	254.09	2943.87
NCT_D61	CTACAGTTTGGCTTACACATGATGGTTGGAATATTCGTCTTGATTCGCTTGACGCTGCTG	157.513	2132.99
NCT_D6290	CTACAATTATCAAACCACATGAAACTTTTTTAATTCGTCTTGATTCGCTTGACGCTGCTG	223.29	1849.25
NCT_D6492	CTAGGTGCGGCGGGTCACCTGCCAGCTTGCCTGTTCGTCTTGATTCGCTTGACGCTGCTG	2045.52	899.684
NCT_D662	GAAAGACATACTCTGTTCGTGATGTTTCTGCATTAGGTCTTGATTCGCTTGACGCTGCTG	134.705	1649.82
NCT_D669	GAAGGTTCACTCCTACAGGTGATTCCTTCGAGATAGGTCTTGATTCGCTTGACGCTGCTG	65.1173	1024.25
NCT_D6736	CTAATCACGTTATCGTACGTGACCGAATGCCGTTTCGTCTTGATTCGCTTGACGCTGCTG	4018.43	2932.26
NCT_D6992	GAAACGACAAACTACCACATGAAGTGGCGGAACTAGGTCTTGATTCGCTTGACGCTGCTG	76.443	1698.3
NCT_D7135	GAAAGCCAACCTCATCACGATGAAGAAGATGTTTAGGTCTTGATTCGCTTGACGCTGCTG	83.1695	1460.59
NCT_D7379	GAAGCAGTACGCTATCATGTGATGAAATATATTTAGGTCTTGATTCGCTTGACGCTGCTG	15452.6	2099.31
NCT_D758	GAAGAGGATTATTGTCATGTGAAGGCGTGATAGTAGGTCTTGATTCGCTTGACGCTGCTG	3705.75	2213.1
NCT_D778	CTACGGTTGTCTTTTCATGTGAGCAGAACTAAATTCGTCTTGATTCGCTTGACGCTGCTG	204.989	1560.06
NCT_D830	GAACTATGTCCATATCACGCGCGCTAAAACAGCTAGGTCTTGATTCGCTTGACGCTGCTG	1087.7	2943.74
NCT_N1001	CTAAAAGCTTGATGACATGTGATAGCACACCATTTCGTCTTGATTCGCTTGACGCTGCTG	5507.18	3619.5
NCT_N1018	GAATACCTAGTAAATCACGATGAGAATTATATATAGGTCTTGATTCGCTTGACGCTGCTG	175.019	1984.52
NCT_N1021	GAAACCTATTAATTGCACCTGACTGACGCCTTTTAGGTCTTGATTCGCTTGACGCTGCTG	3242.8	1226.63
NCT_N1032	GAACAGACATACTTCTTCGTGATGCGAATTTGATAGGTCTTGATTCGCTTGACGCTGCTG	85.8991	1384.04
NCT_N1048	GAAATATCTAGAACTCACGTTATGATATATTCTTAGGTCTTGATTCGCTTGACGCTGCTG	218.035	1862.89
NCT_N1094	CTAGCTTATATTTGTCACGTATACCTACTATTTTTCGTCTTGATTCGCTTGACGCTGCTG	462.743	1978.85
NCT_N1121	GAAGCTCCACCTCATCACCTGAAAAATCTGGAATAGGTCTTGATTCGCTTGACGCTGCTG	74.5014	1320.79
NCT_N114	GAAGAACCGACGATCCTCGTGAGGCTTGCTTGGTAGGTCTTGATTCGCTTGACGCTGCTG	81.6245	1864.92
NCT_N1141	GAATTTTTTGCACATCACGTATGCTACTTTTGTTAGGTCTTGATTCGCTTGACGCTGCTG	275.653	2787.81
NCT_N1169	GAAAAGGAGAGTCGTCACCTGTAAAAGGAATCTTAGGTCTTGATTCGCTTGACGCTGCTG	79.0113	1150.42
NCT_N119	GAACTTAAAAGTGTCCATGTGATGGGAGGGATCTAGGTCTTGATTCGCTTGACGCTGCTG	2438.52	2937.09
NCT_N1203	CTAGATTGCTTTTTTCACATGACCATATTATATTTCGTCTTGATTCGCTTGACGCTGCTG	12456	1706.72
NCT_N122	GAATGAATGATATTTCACATGGTGGATGCCATCTAGGTCTTGATTCGCTTGACGCTGCTG	83.1217	2465.36
NCT_N1285	CTACTCAGAGCGCATCACGATCGGGAGTGTAAATTCGTCTTGATTCGCTTGACGCTGCTG	78.0512	1294.23
NCT_N1289	CTAAGCAAGCCACGCCATGTGATTAACCTTGCTTTCGTCTTGATTCGCTTGACGCTGCTG	5189.22	3420.3
NCT_N1403	GAATTACTGTGCAATCACATGTACAAGGCTCTCTAGGTCTTGATTCGCTTGACGCTGCTG	7455.23	2604.48
NCT_N1404	GAATACGTTCTTTTTCAGGTGATGGTGCCATTTTAGGTCTTGATTCGCTTGACGCTGCTG	98.4511	1598.75
NCT_N1444	CTATATATGTATAATCACGTAGATAATGTATTGTTCGTCTTGATTCGCTTGACGCTGCTG	1561.67	3313.31
NCT_N1448	GAACAAACTTCTGGTCACATGAGTTGAACAGAATAGGTCTTGATTCGCTTGACGCTGCTG	21891.4	1548.69
NCT_N145	GAAGGTTTATAGGTTCACATGATATGAGTATAATAGGTCTTGATTCGCTTGACGCTGCTG	2559.18	1662.56
NCT_N1456	GAAAGCAAGCCACGCCATGTGATTAACCTTGCTTAGGTCTTGATTCGCTTGACGCTGCTG	5436.93	2820.53
NCT_N1462	CTATTACAATGAATACATGTGATATAGATACTTTTCGTCTTGATTCGCTTGACGCTGCTG	5079.38	3160.18
NCT_N1469	GAACCCACTAGTAATCACCTGCATCTATATAAGTAGGTCTTGATTCGCTTGACGCTGCTG	277.971	1508.42
NCT_N152	GAAGATTATGGGCCGCTCGTGACAGTAAAGGAATAGGTCTTGATTCGCTTGACGCTGCTG	1654.43	2494.54
NCT_N1524	CTACTCTTAGTTTTTCATGTGGTAAAGGCAATGTTCGTCTTGATTCGCTTGACGCTGCTG	91.6665	1548.91
NCT_N1537	GAACTCGCATTTGGTCACGTCCTAAAAATTGTATAGGTCTTGATTCGCTTGACGCTGCTG	2821.26	2059.05
NCT_N1587	GAAGCTCGCACTGCGCAGGTGACGGTAAAGAAATAGGTCTTGATTCGCTTGACGCTGCTG	279.297	1802.43
NCT_N1642	CTAATATGTTTTTCATACGTGATTTGAAGTTTTTTCGTCTTGATTCGCTTGACGCTGCTG	129.375	1799.67
NCT_N1726	CTAGCATTTGTATGTCACGAGTTTTCCTTGATTTTCGTCTTGATTCGCTTGACGCTGCTG	13421.9	2843.82
NCT_N1732	GAAGCAGACATGTTGTTCGTGATGATCTTTCTTTAGGTCTTGATTCGCTTGACGCTGCTG	67.8542	1917.21
NCT_N1746	GAAGAGGGATCACATCACGATACTATTGTTTCTTAGGTCTTGATTCGCTTGACGCTGCTG	412.299	1713.64
NCT_N1792	GAACTACGAGGACGCGACGTGACTCAATTGGAATAGGTCTTGATTCGCTTGACGCTGCTG	604.435	1884.77
NCT_N1845	GAAACATATATTAACCACATGAAGGCACTTGCATAGGTCTTGATTCGCTTGACGCTGCTG	124.986	2623.93
NCT_N1853	GAAATCAAAGTGCACTACGTGACAAAAATAAAATAGGTCTTGATTCGCTTGACGCTGCTG	1356.31	2644.49
NCT_N1909	GAATAATTCTATCATCACGCTTATAGTGTTTACTAGGTCTTGATTCGCTTGACGCTGCTG	295.499	1898.96
NCT_N1940	CTAACAATTTCGTCCGACGTGATCTGGAAAATATTCGTCTTGATTCGCTTGACGCTGCTG	1718.94	2016.88
NCT_N1949	CTATAATGGAAGTTACAGGTGACATAAAATCTATTCGTCTTGATTCGCTTGACGCTGCTG	489.649	1415.9
NCT_N1974	GAAGCCAATAATCCTCACATGGTGGAGCTACAATAGGTCTTGATTCGCTTGACGCTGCTG	205.445	2414.16
NCT_N1994	CTAGGGCGCAACAAACACCTGATGTGACTCCTATTCGTCTTGATTCGCTTGACGCTGCTG	238.295	1658.64
NCT_N2001	GAAATAACATTACCATACGTGATCTTATTAAACTAGGTCTTGATTCGCTTGACGCTGCTG	284.038	1965.22
NCT_N2034	CTAATTGAAGATGTACAGGTGATTAATTACGTCTTCGTCTTGATTCGCTTGACGCTGCTG	498.327	1577.58
NCT_N2099	CTAAATTTAGTTGAACATGTGACGAAAGCTCTGTTCGTCTTGATTCGCTTGACGCTGCTG	26757	3687.71
NCT_N2142	CTACTTTGTATTCCTCATGTGAGAATGTTGGACTTCGTCTTGATTCGCTTGACGCTGCTG	161.466	1946.47
NCT_N2144	CTATAGTACCGTCCGCACATGATGTCATTTCCCTTCGTCTTGATTCGCTTGACGCTGCTG	1033.97	2738.12
NCT_N2160	GAACTTTTTTTTGCAATCGTGATTACAGAAAAATAGGTCTTGATTCGCTTGACGCTGCTG	174.777	1616.65
NCT_N2237	GAATCATTAGCGCCTCATGTGAGCAGGCCATTGTAGGTCTTGATTCGCTTGACGCTGCTG	449.714	1953.39
NCT_N2260	CTAGAACAAATACATCACGAAGACAGAAATACGTTCGTCTTGATTCGCTTGACGCTGCTG	108.865	1744.44
NCT_N2320	CTAGTTCCTTGGAACCACATGATTTACTCAACATTCGTCTTGATTCGCTTGACGCTGCTG	1624.27	2178.8
NCT_N2340	CTACTACCACACTTTCATGTGATGAAACGTGAATTCGTCTTGATTCGCTTGACGCTGCTG	991.773	3736.51
NCT_N236	CTAGTAAATTGACCCAGCGTGACGACAGTAGACTTCGTCTTGATTCGCTTGACGCTGCTG	244.121	1795.55
NCT_N2375	CTAGCAAATAATATCCTCGTGACCTCGAGGCTTTTCGTCTTGATTCGCTTGACGCTGCTG	18797	3052.1
NCT_N2401	CTAATATACAAATATCACCTGTAATATATAAGATTCGTCTTGATTCGCTTGACGCTGCTG	91.8572	1429.28
NCT_N2451	CTACGCTATCACTTACATGTGATATCATTTCTGTTCGTCTTGATTCGCTTGACGCTGCTG	3977.71	2387.16
NCT_N2453	CTAGTTAAGAATGGTCACGTCTTCCTTTGGCTTTTCGTCTTGATTCGCTTGACGCTGCTG	981.977	1835.56
NCT_N2471	GAAACAGAGATTTTGAGCGTGATATTATTCCAATAGGTCTTGATTCGCTTGACGCTGCTG	124.449	1456.39
NCT_N2497	CTACCTTCCTTTTACCTCGTGAAAGGACTATATTTCGTCTTGATTCGCTTGACGCTGCTG	178.055	2255.84
NCT_N2516	CTATGGAAGAAAATGGACGTGACGAATCAATAATTCGTCTTGATTCGCTTGACGCTGCTG	193.752	1593.3
NCT_N2532	CTACGCGCACGGCGTGACGTGGATCCCTAATGTTTCGTCTTGATTCGCTTGACGCTGCTG	1432.05	3539.54
NCT_N2567	GAAATATGTAGTAATCACGTATGCAGACATTAATAGGTCTTGATTCGCTTGACGCTGCTG	180.019	2513.65
NCT_N2605	CTACCACCAGAAAGTCACCTGCTCTCTTAATCATTCGTCTTGATTCGCTTGACGCTGCTG	10301.7	1724.56
NCT_N2618	CTAGTAAAAACCTCTCACATGTTTTTCTCTGCTTTCGTCTTGATTCGCTTGACGCTGCTG	764.974	2385.92
NCT_N2622	GAAATTAGCGGGGATCAGGTGCCGGTAGTATATTAGGTCTTGATTCGCTTGACGCTGCTG	1122.76	2008.88
NCT_N2645	GAATAATTTAATAAATACGTGACACAGCGTATATAGGTCTTGATTCGCTTGACGCTGCTG	592.705	2133.09
NCT_N27	GAACTACATCAAAATCACCTGTGCAATATATATTAGGTCTTGATTCGCTTGACGCTGCTG	694.789	1714.22
NCT_N2728	GAATATATAAAAGAACAGGTGACTCCGTTTTCATAGGTCTTGATTCGCTTGACGCTGCTG	10710.7	1730.24
NCT_N2733	GAATCTTGAAGGCAACATGTGAGATCGGGAAGTTAGGTCTTGATTCGCTTGACGCTGCTG	199.267	2396.24
NCT_N2750	GAAAGGATTGTTTGTCAGGTGTCGCGGCCACAATAGGTCTTGATTCGCTTGACGCTGCTG	1161.69	1439.74
NCT_N2768	GAATTTTATTTTTGTCACGTAGTGCACTTTGATTAGGTCTTGATTCGCTTGACGCTGCTG	861.561	2790.45
NCT_N2781	CTACCTTTCTCAATTCATGTGGCTTCAAACATTTTCGTCTTGATTCGCTTGACGCTGCTG	353.613	1836.36
NCT_N2787	CTAATGTAATAGCCAGACGTGATTCCCCTAAACTTCGTCTTGATTCGCTTGACGCTGCTG	167.404	1972.91
NCT_N2798	CTAATAATAGTGGTCCATGTGACATCTTTATAATTCGTCTTGATTCGCTTGACGCTGCTG	13413.6	3643.84
NCT_N2852	CTAAGTTGATAACGTCAGGTGGAAAACCGAAAGTTCGTCTTGATTCGCTTGACGCTGCTG	209.409	1156.71
NCT_N2890	GAATTGTGATACAGCCACATGAACAGATTCCCATAGGTCTTGATTCGCTTGACGCTGCTG	318.664	2420.67
NCT_N2932	CTAAAAAGGACTTGTCACATGAAATTTAGGTCGTTCGTCTTGATTCGCTTGACGCTGCTG	821.1	1538.33
NCT_N2937	GAAAATCAGGTGAATCATGTGGGACTGAAGAGATAGGTCTTGATTCGCTTGACGCTGCTG	1281.44	2508.12
NCT_N2952	CTACTATTCTAAAATCACGTATATTGTGTATGTTTCGTCTTGATTCGCTTGACGCTGCTG	159.369	2104.85
NCT_N30	CTAAACGCCAACTCTCACATGGTAGCAGGCGGGTTCGTCTTGATTCGCTTGACGCTGCTG	177.126	1948.15
NCT_N3003	GAAAGTTAAGGTATAGGCGTGATGCCATGGGAGTAGGTCTTGATTCGCTTGACGCTGCTG	191.003	2199.46
NCT_N3029	CTACACCATTCGGGGCAGGTGACGAAGCAAGAGTTCGTCTTGATTCGCTTGACGCTGCTG	1322.3	1536.59
NCT_N3036	GAAACTTCTGGTAAACACCTGATGCGATTCTAATAGGTCTTGATTCGCTTGACGCTGCTG	694.207	1204.89
NCT_N3049	GAAAGTGCTAATAATCACATGGTTCGTAGAGGGTAGGTCTTGATTCGCTTGACGCTGCTG	9423.87	3577.64
NCT_N3051	CTAATAATATAGTTACATGTGATGAATGTATGGTTCGTCTTGATTCGCTTGACGCTGCTG	5650.56	2777.38
NCT_N3054	CTAATGTCAAAAAATCTCGTGAGACCTCCGGAATTCGTCTTGATTCGCTTGACGCTGCTG	221.209	1353.17
NCT_N3079	CTAATCACAAAGAATCACGAGGAAAAGATTGATTTCGTCTTGATTCGCTTGACGCTGCTG	2094.46	2566.93
NCT_N3086	CTAGAGTAGTAGGTTCACGTTATGTCTCTCTTTTTCGTCTTGATTCGCTTGACGCTGCTG	124.461	1730.07
NCT_N3097	GAACCTTCCTTTTTATTCGTGATGTTGAGTAAGTAGGTCTTGATTCGCTTGACGCTGCTG	159.914	1549.27
NCT_N3162	GAACTTGGAGAATAACATGTGATCTGAAAACTCTAGGTCTTGATTCGCTTGACGCTGCTG	13115.6	3764.21
NCT_N317	CTATAATATCATGAACAGGTGATAGTAGAATGTTTCGTCTTGATTCGCTTGACGCTGCTG	1160.23	1918.95
NCT_N3178	CTATCCTTTCTCCATCACATGAGTACGAGGAGGTTCGTCTTGATTCGCTTGACGCTGCTG	1305.22	1913
NCT_N3191	GAAGGTTAAGAAAAACACCTGACAAATAATAATTAGGTCTTGATTCGCTTGACGCTGCTG	4457.36	1693.89
NCT_N3198	CTAATTACTATTATACATGTGATATCAGAACGGTTCGTCTTGATTCGCTTGACGCTGCTG	9100.58	3610.24
NCT_N3232	GAAAATAACAGCAAACAGGTGATGTAACTTATATAGGTCTTGATTCGCTTGACGCTGCTG	372.077	1767.86
NCT_N3241	CTAACTACGCATTATCACGTAGGCATATATATGTTCGTCTTGATTCGCTTGACGCTGCTG	189.724	1930.46
NCT_N331	CTAGTCTACTTCTTTCACGTTACCATTTACTAATTCGTCTTGATTCGCTTGACGCTGCTG	611.663	2207.75
NCT_N3317	CTAATATATGGCTATCACATGGCACAGGTATTATTCGTCTTGATTCGCTTGACGCTGCTG	7075.41	3685.37
NCT_N3363	CTAGTAACTTAGTATCACATGTATTAGTATTAATTCGTCTTGATTCGCTTGACGCTGCTG	10109.5	3471.08
NCT_N3392	CTAATAGTTACTGATCAGGTGATGAGACGATAATTCGTCTTGATTCGCTTGACGCTGCTG	18578.3	1440.18
NCT_N3397	CTAGCCAAGCATTATCAGGTGCCCATAAATAACTTCGTCTTGATTCGCTTGACGCTGCTG	1416.52	1418.01
NCT_N3405	GAAGTCCTTTAATCTCAGCTGATATCGTCCTTCTAGGTCTTGATTCGCTTGACGCTGCTG	146.896	1244.19
NCT_N3442	GAAGAGGTGAAATTTCAGCTGACAGCGAGTTTCTAGGTCTTGATTCGCTTGACGCTGCTG	50.4309	1552.11
NCT_N349	GAAAAGCATTATTCACACCTGATAAGGATTTTCTAGGTCTTGATTCGCTTGACGCTGCTG	288.898	1387.79
NCT_N3546	CTAAACTTTTGTCATCACCTGCTCTCTGAAGGTTTCGTCTTGATTCGCTTGACGCTGCTG	917.642	1571.52
NCT_N3550	CTAACGCGAACTAGTCACGATTGATCAAACTTTTTCGTCTTGATTCGCTTGACGCTGCTG	189.263	1420.69
NCT_N3559	GAAATTGCGAGATATCACATGTGCGCTTTCCTTTAGGTCTTGATTCGCTTGACGCTGCTG	6879.36	7030.01
NCT_N3600	GAAATCGATTTTTGTCACCTGCAAACTCTTCTTTAGGTCTTGATTCGCTTGACGCTGCTG	308.462	1387.48
NCT_N3655	CTACTTACTCGGTATCACATGGAAAAGACCCCCTTCGTCTTGATTCGCTTGACGCTGCTG	765.55	1887.59
NCT_N3695	CTAGGAAAAGTGTCTCACATGTAAAGGATTAAATTCGTCTTGATTCGCTTGACGCTGCTG	362.795	1958.01
NCT_N3716	GAACTTGTCCCATGTCAGGTGTAAAACTGACGGTAGGTCTTGATTCGCTTGACGCTGCTG	507.54	1189.9
NCT_N3720	CTATACCACTGCGCACCCGTGACGCTGCTCCAATTCGTCTTGATTCGCTTGACGCTGCTG	1086.82	2043.22
NCT_N3755	GAAATTATAACAAAACAGGTGATAACCGTGATCTAGGTCTTGATTCGCTTGACGCTGCTG	1076.84	1777.87
NCT_N3769	GAAAAAAGTAGTTGTCACGTATGTGTCAAATATTAGGTCTTGATTCGCTTGACGCTGCTG	219.284	2277.95
NCT_N3782	CTAATAGGGTCATGTCACGTAATAAGCAACGTGTTCGTCTTGATTCGCTTGACGCTGCTG	578.161	7447.89
NCT_N3796	GAACTTTTAGTTAATCAGGTGTGAGGTGGAATGTAGGTCTTGATTCGCTTGACGCTGCTG	368.391	1772.83
NCT_N3840	CTACAGCTTTAGACTCACATGGGTTCTCATGAGTTCGTCTTGATTCGCTTGACGCTGCTG	148.926	2354.83
NCT_N3850	CTAAAGATCAAATCTCACATGTTTATCATTCATTTCGTCTTGATTCGCTTGACGCTGCTG	280.992	2506.5
NCT_N3866	GAATCTCCGACCAGTCACGATTAATTAAATTGCTAGGTCTTGATTCGCTTGACGCTGCTG	271.607	1396.7
NCT_N3882	CTAACCCTAACAATACACATGATGCAACTGGAATTCGTCTTGATTCGCTTGACGCTGCTG	418.194	3113.82
NCT_N39	CTAGAACCACTTGGTCAGGTGCGGTACGTAAAATTCGTCTTGATTCGCTTGACGCTGCTG	2528.12	1779.04
NCT_N3959	CTATGACATTAATCCTACGTGACTTACACATATTTCGTCTTGATTCGCTTGACGCTGCTG	850.938	2422.48
NCT_N3980	GAAAACAAATAACATCACGATGCACGAGCACTGTAGGTCTTGATTCGCTTGACGCTGCTG	585.189	4240.58
NCT_N4008	CTAAATCTTTTTTGTCACATGTACACACTCATATTCGTCTTGATTCGCTTGACGCTGCTG	19814.6	4580.05
NCT_N401	GAAATGGTAGGAGCACGCGTGAAAGCAGGGTCTTAGGTCTTGATTCGCTTGACGCTGCTG	137.413	4442.43
NCT_N4010	GAAAATATGGCGATATACGTGACAGATCCCACATAGGTCTTGATTCGCTTGACGCTGCTG	173.592	2264.61
NCT_N4044	CTATGATCTTGTATTCATGTGATTGTAAATAATTTCGTCTTGATTCGCTTGACGCTGCTG	3654.31	1581.34
NCT_N4045	GAAATAAGAAACATCCATGTGATAAAACTCCGCTAGGTCTTGATTCGCTTGACGCTGCTG	1109.48	3146.37
NCT_N406	CTAGGGCCGTCCACTCATGTGATTTTCAACAAATTCGTCTTGATTCGCTTGACGCTGCTG	2537.05	1494.4
NCT_N4061	CTAATTTAAAGAAATCCCGTCACGCCTGGAATGTTCGTCTTGATTCGCTTGACGCTGCTG	517.554	2128.93
NCT_N4077	CTAGCCCTTAGATCTCACATGATGCTTGACTGATTCGTCTTGATTCGCTTGACGCTGCTG	839.195	1782.64
NCT_N418	CTATATATAACAAATCACGTATAAGCATGAGAATTCGTCTTGATTCGCTTGACGCTGCTG	199.615	2699.14
NCT_N4219	CTAGGGATGGCTCATCACGAACAGCAAACTGAATTCGTCTTGATTCGCTTGACGCTGCTG	59.8289	1133.8
NCT_N4230	CTATATTTATGGCATCACGATTATTCTCACCAGTTCGTCTTGATTCGCTTGACGCTGCTG	221.24	1576.56
NCT_N4235	GAATATCTTAGATTTTACGTGATATGTTGGATATAGGTCTTGATTCGCTTGACGCTGCTG	107.557	1510.68
NCT_N4244	GAATACATTCCGGGTCACATGTGCCCAAATTCTTAGGTCTTGATTCGCTTGACGCTGCTG	22090.1	6641.28
NCT_N4316	CTAAAAAGAACTGTGTACGTGATTTCTTTGTCCTTCGTCTTGATTCGCTTGACGCTGCTG	369.29	1710.1
NCT_N4373	CTATATCATTTAAATCACATGGACACCCACCGATTCGTCTTGATTCGCTTGACGCTGCTG	10055.6	3199.16
NCT_N438	GAAGAGTGACCTGAGCAGGTGACTTAGGTGGAGTAGGTCTTGATTCGCTTGACGCTGCTG	4730.76	1306.5
NCT_N4403	CTAGTTTGGCTTGCTCACATGGGGCTACACGTATTCGTCTTGATTCGCTTGACGCTGCTG	238.551	2750.54
NCT_N4420	GAATTATCAATAAATCACCTGCACACGCTGTCCTAGGTCTTGATTCGCTTGACGCTGCTG	847.066	3505.37
NCT_N4430	CTATCTGATATTAATCACATGTATATCTCAATTTTCGTCTTGATTCGCTTGACGCTGCTG	8719.56	3077.63
NCT_N4434	CTAATGACTCCACGTCACATGAAACCACACCGTTTCGTCTTGATTCGCTTGACGCTGCTG	2318.87	2173.04
NCT_N445	GAATGTATATTTGATCACGTATTGAACTGTTACTAGGTCTTGATTCGCTTGACGCTGCTG	2252.38	2258.35
NCT_N4454	CTATCATATTCGTTAATCGTGATGAGAATACTATTCGTCTTGATTCGCTTGACGCTGCTG	113.055	1320.69
NCT_N446	CTACCCTGGAAGTCTCAGCTGATTCATTTAAATTTCGTCTTGATTCGCTTGACGCTGCTG	168.562	1112.88
NCT_N4476	GAAGGCTGTTTTCGTCACGGGGAATCCTTACACTAGGTCTTGATTCGCTTGACGCTGCTG	1610.43	2058.36
NCT_N4498	GAAGAAAAGCGAAAACAGGTGATAATAATGATGTAGGTCTTGATTCGCTTGACGCTGCTG	306.663	2125.94
NCT_N4547	CTAAGTGTAAGCGGTCAGGTGTAAGTAGTAGGCTTCGTCTTGATTCGCTTGACGCTGCTG	1753.12	1432.23
NCT_N4584	CTAGTAACCCACTTTAACGTGACTGGACCTGAGTTCGTCTTGATTCGCTTGACGCTGCTG	967.922	1600.61
NCT_N4612	CTATCTGGAAAAAATCACATGAAAAAATTTCAGTTCGTCTTGATTCGCTTGACGCTGCTG	1595.56	1284.84
NCT_N4632	CTATGGTATAATATTCACATGGTGCTCTACCGTTTCGTCTTGATTCGCTTGACGCTGCTG	207.5	2532.7
NCT_N4645	CTACAGTTTTATCGTCATGTGCGCGTGTAGGCATTCGTCTTGATTCGCTTGACGCTGCTG	6437.66	6892.68
NCT_N465	CTATAACGTCACACTCACATGAGTTTTCCTGACTTCGTCTTGATTCGCTTGACGCTGCTG	147.025	1484.83
NCT_N4656	GAAAGCGAATTTCCTCACATGTAGGGACCGAATTAGGTCTTGATTCGCTTGACGCTGCTG	176.702	2471.37
NCT_N4689	CTAGAAATTTCCCGCCACATGAACTGAGTCAGGTTCGTCTTGATTCGCTTGACGCTGCTG	263.02	1734.59
NCT_N4726	CTATCGAATAAATATCACATGTAACTTGAAGGTTTCGTCTTGATTCGCTTGACGCTGCTG	4370.51	2390.48
NCT_N4756	CTAATATCAATATGACATGTGATCTCACTCCGCTTCGTCTTGATTCGCTTGACGCTGCTG	10132	3955.03
NCT_N4759	CTACTTCAATGTCATCACGTACTTAATTATGTTTTCGTCTTGATTCGCTTGACGCTGCTG	259.408	2137.43
NCT_N4781	CTAATATATAAGATCCATGTGATAATGAATGCTTTCGTCTTGATTCGCTTGACGCTGCTG	3651.82	2577.32
NCT_N479	GAATGCTTTTCAAATCACGAACGCAATCAGTACTAGGTCTTGATTCGCTTGACGCTGCTG	88.4722	1282.28
NCT_N4828	GAAAGGGGAATAGGTCACATGAAACGACGACAATAGGTCTTGATTCGCTTGACGCTGCTG	7233.5	1881.3
NCT_N4936	CTAGTAACTACCAATCTCGTGAGATTTTTCATATTCGTCTTGATTCGCTTGACGCTGCTG	213.017	1953
NCT_N4962	GAAAATCAAACTGTTTACGTGACATTGTACAATTAGGTCTTGATTCGCTTGACGCTGCTG	329.896	2363.55
NCT_N4968	GAACAACACACTCTTCCCGTGATGCGAATGGTATAGGTCTTGATTCGCTTGACGCTGCTG	759.384	2042.29
NCT_N5019	CTACTCAACACATCTCAGCTGATTGTTCCTTATTTCGTCTTGATTCGCTTGACGCTGCTG	88.9486	1782.72
NCT_N5108	GAAGGTATTTTATGTCACGTACGGTTTTCAAAATAGGTCTTGATTCGCTTGACGCTGCTG	2333.95	2194.58
NCT_N5139	GAAAAACAGGGTATAGACGTGATGTCAGCTTAATAGGTCTTGATTCGCTTGACGCTGCTG	134.741	1830.77
NCT_N5150	GAACATAATCTTGATAACGTGAAACAGTTTAACTAGGTCTTGATTCGCTTGACGCTGCTG	327.587	1799.54
NCT_N519	CTATCTATAGCTGCACACCTGATTTTTTTGCTATTCGTCTTGATTCGCTTGACGCTGCTG	550.04	1860.16
NCT_N5213	GAAATATGTCAGATCGACGTGACATGTAACATTTAGGTCTTGATTCGCTTGACGCTGCTG	788.382	2077.89
NCT_N5251	GAACATATCAAGAGACACGTCACGACACAACACTAGGTCTTGATTCGCTTGACGCTGCTG	866.349	2604.86
NCT_N5271	CTATTGTTACCTCGTCACCTGTTATCGGTTGAATTCGTCTTGATTCGCTTGACGCTGCTG	852.34	2029.48
NCT_N5282	CTAAATAAGTAACATCATGTGTCATTTTGCACGTTCGTCTTGATTCGCTTGACGCTGCTG	1476.81	5523.2
NCT_N5305	CTACTTGGTTCGTGTCACGTAGTTACCTCACTCTTCGTCTTGATTCGCTTGACGCTGCTG	593.59	2655.91
NCT_N5340	GAAAATTTTGAAATCCACATGACCTTGAATTAATAGGTCTTGATTCGCTTGACGCTGCTG	21662.3	2377.77
NCT_N5348	CTACCCACATACAATCACCTGTAGAAAGAAACATTCGTCTTGATTCGCTTGACGCTGCTG	193.178	1699.59
NCT_N5368	GAAATTCTTCTCGTTCCCGTGATGTTTTCAATATAGGTCTTGATTCGCTTGACGCTGCTG	2643.07	1640.23
NCT_N5371	CTAATGTGTTGATAGCAGGTGACGCGTCTGTAATTCGTCTTGATTCGCTTGACGCTGCTG	1150.07	2028.09
NCT_N5417	GAATTCTATGTGTATCACCTGTTATACGTGTTGTAGGTCTTGATTCGCTTGACGCTGCTG	279.25	2795.58
NCT_N5447	GAAAATAGTTAGGTGCTCGTGACAAACCTTTTTTAGGTCTTGATTCGCTTGACGCTGCTG	3152.23	2819.27
NCT_N5504	GAATTGAGGAAATATCAGGTGTGCCAATACGTTTAGGTCTTGATTCGCTTGACGCTGCTG	170.657	2030.35
NCT_N5523	GAACAAGACACATTTCACCTGATATTGAAGAATTAGGTCTTGATTCGCTTGACGCTGCTG	155.836	2000.07
NCT_N5541	GAACTGGGGTAATCACATGTGATATCTAAGAGATAGGTCTTGATTCGCTTGACGCTGCTG	6785.34	4667.82
NCT_N555	CTATGAATTCTTATACATGTGACTAACCGATATTTCGTCTTGATTCGCTTGACGCTGCTG	21740.7	3678.67
NCT_N5552	CTATTCAAAAAGGATCAGGTGAGATATTAGAGTTTCGTCTTGATTCGCTTGACGCTGCTG	1997.65	1133.04
NCT_N5573	GAAGAATAAAGATATCACGTATACGGGAGAGATTAGGTCTTGATTCGCTTGACGCTGCTG	266.836	1686.88
NCT_N5577	CTATCATTGAAATTTTACGTGACACCATCATTTTTCGTCTTGATTCGCTTGACGCTGCTG	254.148	2042.27
NCT_N5578	GAATCACAGGCATTCCATGTGATAATGAAATTCTAGGTCTTGATTCGCTTGACGCTGCTG	1812.49	1996.5
NCT_N5579	GAAGGATAGTGGCATCACGAGAAGCTGTTGTTCTAGGTCTTGATTCGCTTGACGCTGCTG	347.366	1422.62
NCT_N5598	GAACTTCAAAAAACCCATGTGAGACTGAAACATTAGGTCTTGATTCGCTTGACGCTGCTG	221.621	3093.99
NCT_N5624	GAAAGAAAAAGTGGTCAGGTGCAAGTATACATCTAGGTCTTGATTCGCTTGACGCTGCTG	16963.5	2241.8
NCT_N5642	CTATTTAGATTATATCACGTAGCTATTGTACTATTCGTCTTGATTCGCTTGACGCTGCTG	206.892	1959.05
NCT_N5673	CTATGATAAAGGAACCATGTGATCTTACGTTGATTCGTCTTGATTCGCTTGACGCTGCTG	17805.3	3329.73
NCT_N5679	CTATCCCACATGATTCACCTGATTACGACTCACTTCGTCTTGATTCGCTTGACGCTGCTG	2616.37	3494.39
NCT_N5696	GAAATTAATTAGTCTCACATGGCTGACATAACGTAGGTCTTGATTCGCTTGACGCTGCTG	1123.07	2743.26
NCT_N5712	GAATCAACTTACTAACAGGTGACCTTATCGGTCTAGGTCTTGATTCGCTTGACGCTGCTG	2351.94	1111.82
NCT_N5713	CTAGATATAACTCATCACATGTTAAAGAACCCATTCGTCTTGATTCGCTTGACGCTGCTG	12067.4	3698.39
NCT_N5719	GAAACAGAGAGGTAGCAGGTGATTTACGTAGTTTAGGTCTTGATTCGCTTGACGCTGCTG	453.187	1776.62
NCT_N5744	GAATTTTCTTTGTGTCACATGTAGACTTTGATATAGGTCTTGATTCGCTTGACGCTGCTG	15273.6	3846.83
NCT_N5745	CTAAAAGTAATACGCCACATGAAGACTAACGACTTCGTCTTGATTCGCTTGACGCTGCTG	244.871	1904.45
NCT_N5767	GAAACAAAAAATGCTCACCTGACCTTATTCACCTAGGTCTTGATTCGCTTGACGCTGCTG	20784.6	1577.63
NCT_N5794	CTAGTTCCGGGTAGTCACATGGAAACAATGGCATTCGTCTTGATTCGCTTGACGCTGCTG	6085.03	2311.62
NCT_N5825	GAATTATTCATCTTGTACGTGATAATGTTTCATTAGGTCTTGATTCGCTTGACGCTGCTG	135.642	1995.06
NCT_N5874	CTACTAGAATAGTATCACGTACAGTAGTTTAATTTCGTCTTGATTCGCTTGACGCTGCTG	212.365	1712.27
NCT_N5893	GAAGTTGTCGTCAATCACATGTAAATATCATTATAGGTCTTGATTCGCTTGACGCTGCTG	4916.45	2136.88
NCT_N5976	GAAGTGCTGGTTCGTGACGTGTAAATTCAGAATTAGGTCTTGATTCGCTTGACGCTGCTG	665.992	2014.53
NCT_N6017	CTATGTTTTTATTTCTACGTGATTTTTTTCTTGTTCGTCTTGATTCGCTTGACGCTGCTG	388.087	2172.6
NCT_N6065	CTATCTATTGATCTCTTCGTGATGCCCGGTTATTTCGTCTTGATTCGCTTGACGCTGCTG	122.046	1919.59
NCT_N6071	GAATGTATCTGTGCCCATGTGATCTGTACCTTTTAGGTCTTGATTCGCTTGACGCTGCTG	9344.11	4496.63
NCT_N6086	GAATAGCTTCCATTACACCTGATGACTATTCTCTAGGTCTTGATTCGCTTGACGCTGCTG	202.91	1363.13
NCT_N6094	GAAATCATGCTTTGCCATGTGATGCCCAATAGATAGGTCTTGATTCGCTTGACGCTGCTG	11080.5	3143.68
NCT_N6106	GAAGCATATTGCACTAACGTGAGGTGTACATCATAGGTCTTGATTCGCTTGACGCTGCTG	123.164	2246.46
NCT_N6108	CTAAAATTACCGTCGCTCGTGATTTGTTTGCAATTCGTCTTGATTCGCTTGACGCTGCTG	2523.15	2153.32
NCT_N611	CTAAGGCAATTCAATCAGGTGGTTATACTTGTTTTCGTCTTGATTCGCTTGACGCTGCTG	1294.19	1525.52
NCT_N6134	GAAAATGCAATTAGTCAGGTGGAATCTAATATCTAGGTCTTGATTCGCTTGACGCTGCTG	1121.47	1271.3
NCT_N6143	CTAACTAAATACATGCAGGTGACTGATAGAAAATTCGTCTTGATTCGCTTGACGCTGCTG	2569.52	2135.66
NCT_N6144	CTAAGAACTATAAATCACATGTGCTGTCAAGAGTTCGTCTTGATTCGCTTGACGCTGCTG	6335.51	6722.23
NCT_N6167	CTATAGAGCTACTATCACATGTTGAACCTTGAATTCGTCTTGATTCGCTTGACGCTGCTG	2467.22	3093.93
NCT_N6170	GAAGCCCCGATAATCCACATGATCATAAGGTCGTAGGTCTTGATTCGCTTGACGCTGCTG	2646.58	2109.22
NCT_N6175	GAACAGAAAAGTTTCCACATGATATTTATTAGCTAGGTCTTGATTCGCTTGACGCTGCTG	1206.54	2335.4
NCT_N6187	GAACAAATTTATAGTCAGCTGAAATATGTGAATTAGGTCTTGATTCGCTTGACGCTGCTG	217.432	1441.5
NCT_N6191	GAAACGAAGCCTTTGCACCTGATATAAAAAGTGTAGGTCTTGATTCGCTTGACGCTGCTG	1030.79	1608.04
NCT_N6205	CTATACAGCACAAATCACGCGTATTTTCAAGCATTCGTCTTGATTCGCTTGACGCTGCTG	848.213	3003.32
NCT_N6212	GAAATCGTTTACAGCCATGTGAGGCAGTTACTTTAGGTCTTGATTCGCTTGACGCTGCTG	204.595	2965.41
NCT_N6241	GAACGGTTACAACGTCACGTCTTTTTCTGTTTATAGGTCTTGATTCGCTTGACGCTGCTG	392.577	1804.84
NCT_N6243	CTACTGGATGATTATCAGGTGTAAGCAATAAGATTCGTCTTGATTCGCTTGACGCTGCTG	233.271	1290.25
NCT_N6251	GAATAATTGTGTTATCACCTGCTATTTTTCTTTTAGGTCTTGATTCGCTTGACGCTGCTG	818.177	1706.06
NCT_N6294	GAATTTGATGGCCGTCACATGGTACGCCACTAATAGGTCTTGATTCGCTTGACGCTGCTG	8941.78	3681.35
NCT_N6299	CTATATTTAATGCGTCACCTGCCTATTCAATAATTCGTCTTGATTCGCTTGACGCTGCTG	6062.41	1880.45
NCT_N6316	GAAAAAGTGACATATCACATGTATGGTAGTATCTAGGTCTTGATTCGCTTGACGCTGCTG	4371.5	2907.83
NCT_N6372	GAATTGGAAAAATGTCACGCGTAAAAATTAGACTAGGTCTTGATTCGCTTGACGCTGCTG	6632.9	2411.23
NCT_N6396	CTAAATTCCTGTAGCTACGTGATGACCTCTGCTTTCGTCTTGATTCGCTTGACGCTGCTG	102.901	1898.21
NCT_N6431	CTAGGTCTCTCTCACCTCGTGATGTTACGAACGTTCGTCTTGATTCGCTTGACGCTGCTG	3419.67	4211.86
NCT_N6433	GAATAAACCTCCCACCACCTGATAATCTGTATGTAGGTCTTGATTCGCTTGACGCTGCTG	197.789	2427.59
NCT_N6438	GAATATTGTTTTCACCATGTGAACAAAGCTGTATAGGTCTTGATTCGCTTGACGCTGCTG	556.599	2673.44
NCT_N6448	GAATCCGTGGATCGCCATGTGATATTTCTATTTTAGGTCTTGATTCGCTTGACGCTGCTG	2430.57	2906.09
NCT_N6449	GAATGATTGTACATTCATGTGATAATTTGACGCTAGGTCTTGATTCGCTTGACGCTGCTG	521.26	1736.11
NCT_N6479	CTAACAGAAACAAATCACATGTTTCCTTGGCAGTTCGTCTTGATTCGCTTGACGCTGCTG	17112.9	3203.54
NCT_N6487	GAAAAGTGGGGTGCTCAGCTGATTTGCATCTTTTAGGTCTTGATTCGCTTGACGCTGCTG	425.344	1865.41
NCT_N6493	CTAATCTATTATTTATACGTGACATACCATTACTTCGTCTTGATTCGCTTGACGCTGCTG	522.203	2161.99
NCT_N6544	CTAACGGTGTATAATCACGATCATATATCATATTTCGTCTTGATTCGCTTGACGCTGCTG	139.378	1588.93
NCT_N6572	GAACTACTTTCTTTCTACGTGACATAAACGAGGTAGGTCTTGATTCGCTTGACGCTGCTG	345.678	2467.04
NCT_N6574	GAATTGTCAGTAAGTCACGTAGACCTGTATCGGTAGGTCTTGATTCGCTTGACGCTGCTG	3881.17	2445.76
NCT_N6604	CTACCAGTATACCGTCACATGCGGTGTAACGTGTTCGTCTTGATTCGCTTGACGCTGCTG	3757.68	4574.73
NCT_N6645	GAAGGGGCTTGTGGTCACCTGTCATAGGATGCCTAGGTCTTGATTCGCTTGACGCTGCTG	3051.79	1643.41
NCT_N6663	CTACCAATATATACTCACATGTAACAACTTATTTTCGTCTTGATTCGCTTGACGCTGCTG	559.255	2918.37
NCT_N6672	CTATTATTATGATCGCTCGTGACGGATCGTCTTTTCGTCTTGATTCGCTTGACGCTGCTG	825.718	1605.77
NCT_N6683	GAAATCTAAACTACTCACATGAAAAGATTACTATAGGTCTTGATTCGCTTGACGCTGCTG	315.729	1870.83
NCT_N6707	GAATCTATAATTATGCAGGTGATGGGGTATCGATAGGTCTTGATTCGCTTGACGCTGCTG	224.358	1967.22
NCT_N6717	GAAGCGCGCCAACCTCACGTTTGCATTCTTGAATAGGTCTTGATTCGCTTGACGCTGCTG	61.7253	3091.86
NCT_N672	GAAAAAAAGGTTTGTCACGAGCACCTAACTACTTAGGTCTTGATTCGCTTGACGCTGCTG	2896.65	2958.57
NCT_N6730	CTACTGGAGGTTAATCACCTGTTGTCTTACTATTTCGTCTTGATTCGCTTGACGCTGCTG	295.796	977.028
NCT_N6747	GAAAAAGAAAAAAATTACGTGACGCGACGCGTTTAGGTCTTGATTCGCTTGACGCTGCTG	246.462	1856.51
NCT_N6786	GAAAAGTGGGTATCTCACATGGTTTTGATTGGGTAGGTCTTGATTCGCTTGACGCTGCTG	264.62	2139.81
NCT_N6797	GAAAATAATAGTATACAGGTGATTCTTATTTATTAGGTCTTGATTCGCTTGACGCTGCTG	631.378	1633.29
NCT_N6801	GAAAGTAGTTCGGTGCTCGTGACAAACCTTTTTTAGGTCTTGATTCGCTTGACGCTGCTG	3017.55	2298.09
NCT_N6816	CTAATTTGATCATTGTACGTGATGAATCCATGTTTCGTCTTGATTCGCTTGACGCTGCTG	100.537	1845.19
NCT_N683	GAATCAAATTGCGGTCACGTATATGCCAACGTTTAGGTCTTGATTCGCTTGACGCTGCTG	1532.18	2059.52
NCT_N684	GAACTTTAAGTCCATCACATGGTGTTTTATGGGTAGGTCTTGATTCGCTTGACGCTGCTG	5767.4	3635.52
NCT_N6847	CTAAAATACTGATACCACATGAACTATTGATCATTCGTCTTGATTCGCTTGACGCTGCTG	122.091	2141.51
NCT_N6850	CTATCGATCCCCCTCATCGTGATGTAGTCAACCTTCGTCTTGATTCGCTTGACGCTGCTG	67.3875	1708.18
NCT_N686	GAAAAAAAAGAATGTCACATGGAACGAGGTTACTAGGTCTTGATTCGCTTGACGCTGCTG	7420.14	3408.03
NCT_N687	GAAACGTAACGTTGTCACGTCCACAGAAGATGCTAGGTCTTGATTCGCTTGACGCTGCTG	175.724	1764.85
NCT_N6875	GAAAATTACTACCATCACCTGCATCAAATTCCATAGGTCTTGATTCGCTTGACGCTGCTG	311.163	1663.93
NCT_N6878	GAATACATCCGTACACATGTGACGTTCGTTCAATAGGTCTTGATTCGCTTGACGCTGCTG	9361.1	5274.18
NCT_N689	CTAGCAGTGGGTCGTGACATGAATATTCAAAAGTTCGTCTTGATTCGCTTGACGCTGCTG	1825.31	2220.21
NCT_N6898	CTAGCCTAGGAACTACACCTGACAGCAACTTGCTTCGTCTTGATTCGCTTGACGCTGCTG	129.673	1385.64
NCT_N6911	CTAGAGTTTCGAGAATTCGTGATTCAATGTTCATTCGTCTTGATTCGCTTGACGCTGCTG	47.5902	1342.79
NCT_N6993	GAACAAACCATAACACCCGTGATGACAACAACATAGGTCTTGATTCGCTTGACGCTGCTG	701.763	2160.84
NCT_N7067	GAATCGGAAGAACACCACATGATGCAAGTTCTCTAGGTCTTGATTCGCTTGACGCTGCTG	1522.08	3133.45
NCT_N7077	CTATTCAATCACCCCCTCGTGAGAATTTAATGTTTCGTCTTGATTCGCTTGACGCTGCTG	257.424	2754.43
NCT_N7094	CTATAAGCTTGGCGTGATGTGATATATACTTGTTTCGTCTTGATTCGCTTGACGCTGCTG	189.824	1651.8
NCT_N7107	GAAAATATAATAATACAGGTGATAGAATGCGAATAGGTCTTGATTCGCTTGACGCTGCTG	232.473	1713.93
NCT_N7114	CTAGCAGTGTCGTCGTACGTGATGAGGGCAGGCTTCGTCTTGATTCGCTTGACGCTGCTG	88.3697	1485.22
NCT_N7150	GAAATATTCTTTCATAACGTGAAACATAAAGTTTAGGTCTTGATTCGCTTGACGCTGCTG	164.446	1540.9
NCT_N7157	GAATAAATAGACACTCACATGTATATTAATTTATAGGTCTTGATTCGCTTGACGCTGCTG	2662.78	2664.32
NCT_N7162	GAAGACAGTTGTGCTCACATGATATAACAAAAGTAGGTCTTGATTCGCTTGACGCTGCTG	9817.74	2103.89
NCT_N7175	CTAAACGGCATCTCTCACCTGATTGTTCTCAAGTTCGTCTTGATTCGCTTGACGCTGCTG	246.36	1377.51
NCT_N7213	CTACTGATTTGAACTCATGTGATCACTTTTGTTTTCGTCTTGATTCGCTTGACGCTGCTG	17192.8	2194.58
NCT_N7216	CTACTCAAGGTGAGTCACGATGCAGAACTGGAATTCGTCTTGATTCGCTTGACGCTGCTG	508.275	2581.57
NCT_N7222	CTATTTTCAATGTTATACGTGATTTTATCTTTGTTCGTCTTGATTCGCTTGACGCTGCTG	109.889	1983.91
NCT_N7225	CTATTGTCCGTAGTCATCGTGACTGGTTGACGTTTCGTCTTGATTCGCTTGACGCTGCTG	490.697	1990.72
NCT_N7226	CTAGTACGGAAAGATCACATGTATATATTTAACTTCGTCTTGATTCGCTTGACGCTGCTG	15117.4	3497.39
NCT_N7227	GAAATGCCTTCGGTTCACATGGTAAACTCGAGCTAGGTCTTGATTCGCTTGACGCTGCTG	121.894	2127.13
NCT_N7232	CTATTCGGTAGATATCACATGGAATACTGCAGCTTCGTCTTGATTCGCTTGACGCTGCTG	974.92	2111.08
NCT_N7260	GAATATTGTTTCTTATTCGTGATGTTGGGTTCATAGGTCTTGATTCGCTTGACGCTGCTG	160.408	1558.34
NCT_N729	CTATGGAAAGGCCTTCACATGGTGATCCATCTTTTCGTCTTGATTCGCTTGACGCTGCTG	109.281	1986.53
NCT_N7292	CTAGCGTTATGCTTCCATGTGACCCAACATCTATTCGTCTTGATTCGCTTGACGCTGCTG	10726.6	2932.55
NCT_N7324	CTAGATTCTTATAATCACGTATGAACATTCTTATTCGTCTTGATTCGCTTGACGCTGCTG	71.727	1472.1
NCT_N7357	GAAGGGTAGTCATTCATCGTGATGATTCATTATTAGGTCTTGATTCGCTTGACGCTGCTG	93.0499	1643.93
NCT_N7465	CTAACGATATTTCTGATCGTGATTAAACTGGTATTCGTCTTGATTCGCTTGACGCTGCTG	138.636	1514.53
NCT_N7471	CTAATTTGAGCATCTCACATGGTTACGAATGTATTCGTCTTGATTCGCTTGACGCTGCTG	421.864	2084.93
NCT_N7478	CTAGTTTAGTAGAACCTCGTGAAACTTACATTTTTCGTCTTGATTCGCTTGACGCTGCTG	156.44	1907.69
NCT_N7483	CTAATTTTTTTCTGTCAGGTGCGGCCCATCATCTTCGTCTTGATTCGCTTGACGCTGCTG	1320.05	1511.54
NCT_N7484	CTAAAATATGCATATCATGTGGTTACATAAGAATTCGTCTTGATTCGCTTGACGCTGCTG	3800.34	3684.44
NCT_N811	GAATTACAAACACATCACGGGCCACCGGAAAAATAGGTCTTGATTCGCTTGACGCTGCTG	1244.12	2426.13
NCT_N819	GAACGGTAAAATAATCACCTGAAAAAAACTAGGTAGGTCTTGATTCGCTTGACGCTGCTG	172.25	1588.37
NCT_N825	CTATGTATCTGTGCCCATGTGATCTGTACCTTTTTCGTCTTGATTCGCTTGACGCTGCTG	23048.6	4705.99
NCT_N828	CTAATTGCACGCCTCCTCGTGAGTAGTGACCGTTTCGTCTTGATTCGCTTGACGCTGCTG	174.492	3584.76
NCT_N832	CTAGTTAATCGCCTACATGTGAGGTTTTTTTAATTCGTCTTGATTCGCTTGACGCTGCTG	263.639	2816.87
NCT_N868	GAAAACCAATCATGTCACGTAGTGAATTTACTTTAGGTCTTGATTCGCTTGACGCTGCTG	697.642	2381.79
NCT_N886	CTAATTTAAAGTCCCATCGTGACGCTCATAATATTCGTCTTGATTCGCTTGACGCTGCTG	248.131	2516.22
NCT_N931	CTAGTAATCTCGAATCACATGGTACCTCTTTCTTTCGTCTTGATTCGCTTGACGCTGCTG	11273	4472.67
NCT_N952	GAAATCTGAAATTTTGACGTGACATGAGAGGACTAGGTCTTGATTCGCTTGACGCTGCTG	91.3397	1172.74
NCY_N3334	CTATGCGCCGGGTGATGCGTGACGCGTTTTTGGTTCGTCTTGATTCGCTTGACGCTGCTG	619.475	2618.24
NC_D1247	GAAAAATCTTGCTGTGACCCAAACAAGAAAGAGTAGGTCTTGATTCGCTTGACGCTGCTG	92.7181	1383.96
NC_D1381	GAAGCAGGATGAAATCACGGGCGATGGGACCACTAGGTCTTGATTCGCTTGACGCTGCTG	146.959	1719.18
NC_D1453	GAAAGCACAGATGGTCCCGTGGCACGTACCATCTAGGTCTTGATTCGCTTGACGCTGCTG	2741.12	3322.66
NC_D1571	GAAAATTGGTGGTGGACCGTGACCGACACGCAATAGGTCTTGATTCGCTTGACGCTGCTG	413.228	2510.24
NC_D1612	GAAGCCGCCCTTGCGCACGGGACCCAGGCTGGATAGGTCTTGATTCGCTTGACGCTGCTG	2647.9	2737.44
NC_D1885	CTAAGAAAAAAGGGCCACGGGATTTTTTTTTCGTTCGTCTTGATTCGCTTGACGCTGCTG	1916.53	3515.44
NC_D2178	GAAAACTTGTTATTCAGCGTGAAGAACGATATTTAGGTCTTGATTCGCTTGACGCTGCTG	82.5119	1676.18
NC_D2495	CTATTCTACCCCTTCAGCGTGAAAAATCACCATTTCGTCTTGATTCGCTTGACGCTGCTG	144.03	1801.06
NC_D2508	GAAGATGGACAGCACCGTGTGACTGAGTCTATATAGGTCTTGATTCGCTTGACGCTGCTG	146.814	2120.1
NC_D256	CTAGAGCTTCCAGGTCACGGTCTACGGCGGGCGTTCGTCTTGATTCGCTTGACGCTGCTG	527.22	1107.81
NC_D2643	CTAGTTTCATCTGGAAAAGATGGAGACTGAAAATTCGTCTTGATTCGCTTGACGCTGCTG	54.9614	1063.09
NC_D2906	CTAAGCACTCGCTATTTCGTGACAACGTTCCAGTTCGTCTTGATTCGCTTGACGCTGCTG	62.6418	2537.8
NC_D2999	CTAAGATTGAAATCCTCCGTGATTTGCTCCGGATTCGTCTTGATTCGCTTGACGCTGCTG	75.5569	1099.6
NC_D3190	CTATCTAGAAAAATTCACATGCTGATTCATTTATTCGTCTTGATTCGCTTGACGCTGCTG	206.758	2385.88
NC_D3306	CTAGCGTGACATCAGTATGCGCTTTGGATGTTTTTCGTCTTGATTCGCTTGACGCTGCTG	153.892	1849.47
NC_D3426	CTAATTCAAATACCCCCCGTGAAGTATCAGATGTTCGTCTTGATTCGCTTGACGCTGCTG	93.3955	1736.23
NC_D3469	CTAGTGTGTCATTGTCATGTGTTCTTACTTCTTTTCGTCTTGATTCGCTTGACGCTGCTG	2876.37	4100.34
NC_D3498	GAAGAGCAGGATGATCCCGTGCCCGAACTGGATTAGGTCTTGATTCGCTTGACGCTGCTG	4326.17	2728.2
NC_D3682	CTACATGTATTGTTTCACATGAAATTTCGGCCATTCGTCTTGATTCGCTTGACGCTGCTG	166.966	1914.51
NC_D3689	GAATGAAACAAATATTTCGTGACAGAATACTAATAGGTCTTGATTCGCTTGACGCTGCTG	101.287	1598
NC_D3703	CTAAATGGCTGTGGTCACATCAGGACCTACGAATTCGTCTTGATTCGCTTGACGCTGCTG	124.075	1178.21
NC_D3790	CTATTGCAACATGTTCACATGTTCATCCCCCTGTTCGTCTTGATTCGCTTGACGCTGCTG	682.506	3659.82
NC_D4071	CTAGCGTATCCAGTTTACGTGTGATGGCAATGTTTCGTCTTGATTCGCTTGACGCTGCTG	89.5389	1943.34
NC_D4085	GAACGGGTAATAGTACACGGGATGAAGAGACTTTAGGTCTTGATTCGCTTGACGCTGCTG	274.379	2244.46
NC_D4124	GAACTTCGTCGTCTTCATGATCACCTTTATTGTTAGGTCTTGATTCGCTTGACGCTGCTG	97.9028	1432.88
NC_D4195	CTAGTTTCTTTGGTGATCATGATATTAATAGAATTCGTCTTGATTCGCTTGACGCTGCTG	108.375	1435.96
NC_D4365	CTATCATCGTATATTTCCGTGATTGCTCCTTTCTTCGTCTTGATTCGCTTGACGCTGCTG	68.1567	1561.24
NC_D4487	GAATGGGGCTTGTTTCACGTTTTCTGTCCCAAATAGGTCTTGATTCGCTTGACGCTGCTG	417.569	5775.47
NC_D4494	CTAGTGCTCTTGGATCACGATCCCTCACTTGTATTCGTCTTGATTCGCTTGACGCTGCTG	308.027	1886
NC_D4587	GAACGCAAGTGATGGAATGTGATCATTAAAGGCTAGGTCTTGATTCGCTTGACGCTGCTG	464.01	1622
NC_D4609	CTACCACTCTGGAACGCCGTGACCAGCTCAGCCTTCGTCTTGATTCGCTTGACGCTGCTG	196.502	1113.16
NC_D4669	CTAGGGCGAAGAGGTCACGACCTATTTTTTCTTTTCGTCTTGATTCGCTTGACGCTGCTG	2198.51	2028.07
NC_D4693	GAACAGACGTAAAACCGCATGACACCAAGCCTATAGGTCTTGATTCGCTTGACGCTGCTG	116.307	1673.97
NC_D4699	GAATCTATTATCAAGCATGATCACCATCATCAATAGGTCTTGATTCGCTTGACGCTGCTG	196.587	1528.54
NC_D4820	GAAGACCACCTTGCGCACGGGAACGCCGCACTGTAGGTCTTGATTCGCTTGACGCTGCTG	316.699	3027.99
NC_D499	GAATCCAAGAATATAGATGTGACCATCCTGTTATAGGTCTTGATTCGCTTGACGCTGCTG	55.0173	1496.36
NC_D5033	CTAAAACCCAAGCGCTATGATCACAAACGGCGATTCGTCTTGATTCGCTTGACGCTGCTG	52.3308	1570.88
NC_D5066	CTAAATTCTACTTATCACGTCCCATTGTTGCTATTCGTCTTGATTCGCTTGACGCTGCTG	138.222	1738.66
NC_D5093	CTAAAGTACTGTATACACATGATAATAACTGGTTTCGTCTTGATTCGCTTGACGCTGCTG	213.982	2465.04
NC_D5112	GAACTTGAAATGGTGATCATGACCTTTTGAACATAGGTCTTGATTCGCTTGACGCTGCTG	158.76	1273.62
NC_D5129	GAAAATTGCTAAGCACACATGACTTCATACTTGTAGGTCTTGATTCGCTTGACGCTGCTG	2721.84	2668.93
NC_D5175	CTAGTATGCAGCGCAGCCGTGACCTCCCGGATATTCGTCTTGATTCGCTTGACGCTGCTG	167.661	1446.82
NC_D5278	GAAATAACCCTGAGCCACATGTGGTAGATGCCGTAGGTCTTGATTCGCTTGACGCTGCTG	241.81	5533.69
NC_D5294	CTATAGCAGAACAAACACATGATATATTCAAAATTCGTCTTGATTCGCTTGACGCTGCTG	860.836	3178.54
NC_D5376	GAACTCTTTCCATCTGCCGTGACAGGGAAGCCTTAGGTCTTGATTCGCTTGACGCTGCTG	85.4438	1032.05
NC_D5454	GAAATTGTTTTAATTATCGTGACTTGTTGTTTTTAGGTCTTGATTCGCTTGACGCTGCTG	445.596	1618.63
NC_D5496	CTATACCACATGCTTCACATGTACAGAAAGTGGTTCGTCTTGATTCGCTTGACGCTGCTG	593.534	5490.59
NC_D5509	CTAGCTATACCGGTGATCACAAGACGTAGTTACTTCGTCTTGATTCGCTTGACGCTGCTG	550.886	1266.01
NC_D5521	GAAGCACACAGAGGTTATGTGACCATGGTAACCTAGGTCTTGATTCGCTTGACGCTGCTG	99.1785	1750.87
NC_D5603	GAAGAAGATGATGATCACGGCTTGGAGGATGACTAGGTCTTGATTCGCTTGACGCTGCTG	154.196	1439.91
NC_D5805	CTATGCTCTCTGTATCACGGGTCTACTAGCAGGTTCGTCTTGATTCGCTTGACGCTGCTG	1625.59	2140.22
NC_D5823	GAAACGTCGAAGCTAAACGTGAGAATTCCCCTGTAGGTCTTGATTCGCTTGACGCTGCTG	153.871	2985.71
NC_D615	CTAGCCTCAAAGAACCCCGTGTGCGGGTATGGCTTCGTCTTGATTCGCTTGACGCTGCTG	153.511	3021.08
NC_D6304	GAAACCAATGTCCTCCACGGGATCGCCACTTTTTAGGTCTTGATTCGCTTGACGCTGCTG	380.131	2496.14
NC_D6481	CTAAGGCGCTTCCATTCCGTGACACTGAGAGTCTTCGTCTTGATTCGCTTGACGCTGCTG	51.5786	1122.43
NC_D6599	CTAGCAGCACCGTTTCACATGTCCGTCTCTTTTTTCGTCTTGATTCGCTTGACGCTGCTG	179.845	2432.54
NC_D66	CTACTGTTGTATTTCCGCGTGAATCCACTTTTATTCGTCTTGATTCGCTTGACGCTGCTG	112.337	1977.67
NC_D6613	CTATCACAGTTCCGGAACCTAAGCCTAACGAAATTCGTCTTGATTCGCTTGACGCTGCTG	61.3624	1194.12
NC_D6616	CTATCCTCTCAGTCTCACGTTTCTATGCGGGTCTTCGTCTTGATTCGCTTGACGCTGCTG	162.085	3270.08
NC_D6851	CTAATTGGGACAAGTCACGAACAATTTTAGAGATTCGTCTTGATTCGCTTGACGCTGCTG	128.616	1431.63
NC_D6854	CTATGTTGGTAACGGCACATGATATGCCAATATTTCGTCTTGATTCGCTTGACGCTGCTG	2201.32	2879.44
NC_D6857	GAACACTAGTCACATCACATGCCAGGCCTTTCTTAGGTCTTGATTCGCTTGACGCTGCTG	3497.82	2471.43
NC_D6909	CTAGAGAAAACCTATCACGTCTGACGAACATGATTCGTCTTGATTCGCTTGACGCTGCTG	76.7491	1373.76
NC_D7044	GAATTTATATGCAATTTCGTGATCTGGGCGGTTTAGGTCTTGATTCGCTTGACGCTGCTG	91.2661	1183.59
NC_D7140	CTAATTCTTCGTATTCACATGTACATTTTCATCTTCGTCTTGATTCGCTTGACGCTGCTG	351.1	2282.69
NC_D7159	GAAAACATTTCGTATTTCGTGATAATAGTTTCTTAGGTCTTGATTCGCTTGACGCTGCTG	73.4416	1125.27
NC_D7321	GAATGCCATGGAGTTGTCGTGATCCAGTTAAATTAGGTCTTGATTCGCTTGACGCTGCTG	145.521	1647.3
NC_D7378	GAATCCCAGCCAGCCTTTCTTGTATTTTGAATGTAGGTCTTGATTCGCTTGACGCTGCTG	118.592	1406.14
NC_D744	GAAACCAATGAGTCAAACGTGAGCGATGCTCCCTAGGTCTTGATTCGCTTGACGCTGCTG	85.5128	1995.2
NC_D874	CTAATTTTTGTTTCCTTCGTGACTTCTTTTGCATTCGTCTTGATTCGCTTGACGCTGCTG	203.474	1536.5
NC_D895	GAAATAATAAGCACGCACGAGATGTCCTCCGATTAGGTCTTGATTCGCTTGACGCTGCTG	461.937	5447.96
NC_N1	CTATACTTATGATATCACGACAGCAAATACTAATTCGTCTTGATTCGCTTGACGCTGCTG	163.473	2126.28
NC_N1000	GAATGTCTTTTTCGCCACATGTAATATCTGTAGTAGGTCTTGATTCGCTTGACGCTGCTG	307.723	3737.31
NC_N1002	GAATGGCAGCTCTATCACGAAGCGATGGAAAAATAGGTCTTGATTCGCTTGACGCTGCTG	73.6117	1588.83
NC_N1022	CTATATAAGTTTTTTCACGTTTTTGATTTTTCCTTCGTCTTGATTCGCTTGACGCTGCTG	280.594	4621.65
NC_N104	GAATTGTGCTACTGTCACGATCCGCAAGAGATATAGGTCTTGATTCGCTTGACGCTGCTG	144.794	1984.44
[truncated: 8,773 more rows]

## Sheet: B. TF concentrations
Design of Cbf1-Pho4 competition PBM
	Cbf1 conc. (uM)	Pho4 conc. (uM)
chamber 1	2	0.05
chamber 2	2	0.4
chamber 3	2	2
chamber 4	2	8
chamber 5	0.05	2
chamber 6	0.4	2
chamber 7	8	2

## Sheet: C. Full data for Fig2B
Probe Name	Probe Sequence	Cbf1 binding levels (2uM Cbf1 + 50nM Pho4)	Cbf1 binding levels (2uM Cbf1 + 400nM Pho4)	Cbf1 binding levels (2uM Cbf1 + 2uM Pho4)	Cbf1 binding levels (2uM Cbf1 + 8uM Pho4)
MitomiProbe_mut_1	AAAGCGGTAATTTAACACGTGTTTTCACATATCTAT	3165.7	1370.58	430.423	132.439
MitomiProbe_mut_10	AAAGCGGTAATTTGAAACGTGGGTGCAGATATCTAT	108.731	97.1094	79.72	72.8425
MitomiProbe_mut_100	AAAGCGGTAATTTGCCGCGTGGGTGCAGATATCTAT	88.4773	88.5653	85.6532	79.4062
MitomiProbe_mut_1000	CATACCCAACCTTGGTTAGTGGGTGAAGATATTTGT	59.6254	55.9719	66.3593	61.7218
MitomiProbe_mut_1001	CATACCCAACCTTGGTTCGTGGGTGAAGATATTTGT	62.9844	78.3222	58.6881	50.2589
MitomiProbe_mut_1002	CATACCCAACCTTGGTTGGTGGGTGAAGATATTTGT	62.3673	62.4278	65.0908	54.5155
MitomiProbe_mut_1003	CATACCCAACCTTGGTTTGTGGGTGAAGATATTTGT	69.1755	70.2511	73.411	50.1431
MitomiProbe_mut_1004	CATACCCAACCTTGTAAAGTGGGTGAAGATATTTGT	84.1706	85.243	69.0368	56.0726
MitomiProbe_mut_1005	CATACCCAACCTTGTAACGTGGGTGAAGATATTTGT	92.3897	95.0307	80.3907	65.2512
MitomiProbe_mut_1006	CATACCCAACCTTGTAAGGTGGGTGAAGATATTTGT	73.1033	71.9462	76.1429	68.5227
MitomiProbe_mut_1007	CATACCCAACCTTGTAATGTGGGTGAAGATATTTGT	65.1298	67.1781	63.7845	59.4901
MitomiProbe_mut_1008	CATACCCAACCTTGTACAGTGGGTGAAGATATTTGT	64.9204	74.7844	69.0143	59.8722
MitomiProbe_mut_1009	CATACCCAACCTTGTACCGTGGGTGAAGATATTTGT	70.7447	77.6205	66.8067	51.0476
MitomiProbe_mut_101	AAAGCGGTAATTTGCCGGGTGGGTGCAGATATCTAT	72.507	64.1318	59.7917	53.1504
MitomiProbe_mut_1010	CATACCCAACCTTGTACGGTGGGTGAAGATATTTGT	60.8401	57.281	60.9279	63.9493
MitomiProbe_mut_1011	CATACCCAACCTTGTACTGTGGGTGAAGATATTTGT	73.0682	73.6302	61.1858	55.351
MitomiProbe_mut_1012	CATACCCAACCTTGTAGAGTGGGTGAAGATATTTGT	89.6838	76.2071	71.6109	61.7896
MitomiProbe_mut_1013	CATACCCAACCTTGTAGCGTGGGTGAAGATATTTGT	71.2132	69.7401	70.7587	61.8624
MitomiProbe_mut_1014	CATACCCAACCTTGTAGGGTGGGTGAAGATATTTGT	60.9739	59.9245	57.776	49.6957
MitomiProbe_mut_1015	CATACCCAACCTTGTAGTGTGGGTGAAGATATTTGT	73.2995	72.0192	69.9689	54.3899
MitomiProbe_mut_1016	CATACCCAACCTTGTATAGTGGGTGAAGATATTTGT	69.2638	78.3708	75.9857	59.4312
MitomiProbe_mut_1017	CATACCCAACCTTGTATCGTGGGTGAAGATATTTGT	77.3938	72.9351	65.4243	55.4844
MitomiProbe_mut_1018	CATACCCAACCTTGTATGGTGGGTGAAGATATTTGT	70.4931	73.5057	52.3994	63.3369
MitomiProbe_mut_1019	CATACCCAACCTTGTATTGTGGGTGAAGATATTTGT	81.5118	80.4423	58.7872	59.7686
MitomiProbe_mut_102	AAAGCGGTAATTTGCCGTGTGGGTGCAGATATCTAT	78.7081	88.4688	63.1786	48.7513
MitomiProbe_mut_1020	CATACCCAACCTTGTCAAGTGGGTGAAGATATTTGT	73.1476	83.7893	76.9381	61.1984
MitomiProbe_mut_1021	CATACCCAACCTTGTCACAAAACTTAAGATATTTGT	86.5942	95.6124	89.5095	87.8689
MitomiProbe_mut_1022	CATACCCAACCTTGTCACAACACTTAAGATATTTGT	101.74	126.625	102.625	94.9462
MitomiProbe_mut_1023	CATACCCAACCTTGTCACAAGACTTAAGATATTTGT	168.458	175.682	174.458	168.929
MitomiProbe_mut_1024	CATACCCAACCTTGTCACAATACTTAAGATATTTGT	97.5586	102.246	80.9067	76.3655
MitomiProbe_mut_1025	CATACCCAACCTTGTCACACAACTTAAGATATTTGT	91.2433	97.3425	93.2927	72.6289
MitomiProbe_mut_1026	CATACCCAACCTTGTCACACCACTTAAGATATTTGT	133.617	132.714	140.007	112.852
MitomiProbe_mut_1027	CATACCCAACCTTGTCACACGACTTAAGATATTTGT	140.769	145.767	104.246	78.7725
MitomiProbe_mut_1028	CATACCCAACCTTGTCACACTACTTAAGATATTTGT	103.305	101.064	103.321	75.8126
MitomiProbe_mut_1029	CATACCCAACCTTGTCACAGAACTTAAGATATTTGT	77.1864	85.0444	84.8082	71.6224
MitomiProbe_mut_103	AAAGCGGTAATTTGCCTAGTGGGTGCAGATATCTAT	89.6983	78.5506	93.3519	69.6611
MitomiProbe_mut_1030	CATACCCAACCTTGTCACAGCACTTAAGATATTTGT	87.3721	82.6984	88.9539	71.0064
MitomiProbe_mut_1031	CATACCCAACCTTGTCACAGGACTTAAGATATTTGT	123.925	121.127	122.727	107.661
MitomiProbe_mut_1032	CATACCCAACCTTGTCACAGTACTTAAGATATTTGT	76.8472	82.5576	75.886	75.8368
MitomiProbe_mut_1033	CATACCCAACCTTGTCACATAACTTAAGATATTTGT	91.3856	89.412	100.031	85.2186
MitomiProbe_mut_1034	CATACCCAACCTTGTCACATCACTTAAGATATTTGT	80.2056	86.8879	83.7083	76.913
MitomiProbe_mut_1035	CATACCCAACCTTGTCACATGACTTAAGATATTTGT	4090.38	4825.78	3570.05	3634.5
MitomiProbe_mut_1036	CATACCCAACCTTGTCACATTACTTAAGATATTTGT	127.508	139.02	137.211	103.308
MitomiProbe_mut_1037	CATACCCAACCTTGTCACCAAACTTAAGATATTTGT	90.381	78.5974	74.6605	71.6905
MitomiProbe_mut_1038	CATACCCAACCTTGTCACCACACTTAAGATATTTGT	85.8264	90.5384	90.9942	72.4564
MitomiProbe_mut_1039	CATACCCAACCTTGTCACCAGACTTAAGATATTTGT	101.193	94.696	94.3763	79.2306
MitomiProbe_mut_104	AAAGCGGTAATTTGCCTCGTGGGTGCAGATATCTAT	97.4569	94.1463	91.7353	83.5048
MitomiProbe_mut_1040	CATACCCAACCTTGTCACCATACTTAAGATATTTGT	86.9119	81.7611	80.2174	76.9941
MitomiProbe_mut_1041	CATACCCAACCTTGTCACCCAACTTAAGATATTTGT	78.8071	77.4463	81.9113	61.0304
MitomiProbe_mut_1042	CATACCCAACCTTGTCACCCCACTTAAGATATTTGT	83.1532	85.3923	80.2801	59.8848
MitomiProbe_mut_1043	CATACCCAACCTTGTCACCCGACTTAAGATATTTGT	84.0084	81.1134	84.489	75.4386
MitomiProbe_mut_1044	CATACCCAACCTTGTCACCCTACTTAAGATATTTGT	64.9458	79.3168	82.041	59.8431
MitomiProbe_mut_1045	CATACCCAACCTTGTCACCGAACTTAAGATATTTGT	80.2008	74.8549	74.3002	75.339
MitomiProbe_mut_1046	CATACCCAACCTTGTCACCGCACTTAAGATATTTGT	69.3546	70.9952	71.4145	65.325
MitomiProbe_mut_1047	CATACCCAACCTTGTCACCGGACTTAAGATATTTGT	91.217	96.0263	82.2633	97.0381
MitomiProbe_mut_1048	CATACCCAACCTTGTCACCGTACTTAAGATATTTGT	63.4242	76.0208	53.5877	67.1395
MitomiProbe_mut_1049	CATACCCAACCTTGTCACCTAACTTAAGATATTTGT	73.8045	81.5214	73.0321	77.1275
MitomiProbe_mut_105	AAAGCGGTAATTTGCCTGGTGGGTGCAGATATCTAT	67.3574	75.3082	69.8838	66.4417
MitomiProbe_mut_1050	CATACCCAACCTTGTCACCTCACTTAAGATATTTGT	73.4353	66.0215	80.8259	65.2391
MitomiProbe_mut_1051	CATACCCAACCTTGTCACCTGACTTAAGATATTTGT	2075.68	2097.6	2013.58	2325.94
MitomiProbe_mut_1052	CATACCCAACCTTGTCACCTTACTTAAGATATTTGT	88.4722	85.3365	93.6129	71.4534
MitomiProbe_mut_1053	CATACCCAACCTTGTCACGAAACTTAAGATATTTGT	95.3952	98.8162	95.081	77.4074
MitomiProbe_mut_1054	CATACCCAACCTTGTCACGACACTTAAGATATTTGT	232.899	274.351	259.197	197.811
MitomiProbe_mut_1055	CATACCCAACCTTGTCACGAGACTTAAGATATTTGT	1235.51	1397.31	1051.98	732.525
MitomiProbe_mut_1056	CATACCCAACCTTGTCACGATACTTAAGATATTTGT	301.525	242.879	270.705	161.518
MitomiProbe_mut_1057	CATACCCAACCTTGTCACGCAACTTAAGATATTTGT	134.794	115.622	135.608	83.5847
MitomiProbe_mut_1058	CATACCCAACCTTGTCACGCCACTTAAGATATTTGT	343.807	376.084	321.686	171.893
MitomiProbe_mut_1059	CATACCCAACCTTGTCACGCGACTTAAGATATTTGT	780.773	859.077	561.005	387.386
MitomiProbe_mut_106	AAAGCGGTAATTTGCCTTGTGGGTGCAGATATCTAT	86.0236	92.7606	86.2634	76.9453
MitomiProbe_mut_1060	CATACCCAACCTTGTCACGCTACTTAAGATATTTGT	291.668	263.177	238.304	149.338
MitomiProbe_mut_1061	CATACCCAACCTTGTCACGGAACTTAAGATATTTGT	101.649	85.5145	86.9564	80.6207
MitomiProbe_mut_1062	CATACCCAACCTTGTCACGGCACTTAAGATATTTGT	100.708	97.5596	102.993	81.4025
MitomiProbe_mut_1063	CATACCCAACCTTGTCACGGGACTTAAGATATTTGT	1112.38	1540.46	1093.91	891.527
MitomiProbe_mut_1064	CATACCCAACCTTGTCACGGTACTTAAGATATTTGT	227.17	280.434	227.687	205.353
MitomiProbe_mut_1065	CATACCCAACCTTGTCACGTAACTTAAGATATTTGT	134.469	125.737	117.893	92.4229
MitomiProbe_mut_1066	CATACCCAACCTTGTCACGTCACTTAAGATATTTGT	139.289	123.766	106.535	90.6908
MitomiProbe_mut_1067	CATACCCAACCTTGTCACGTGACTTAAGATATTTGT	28475.2	35082.5	30334	26327.6
MitomiProbe_mut_1068	CATACCCAACCTTGTCACGTGGGTGAAGATATTTGT	4126.13	3552.94	996.021	276.997
MitomiProbe_mut_1069	CATACCCAACCTTGTCACGTGTTTTAAGATATTTGT	7289.79	7207.31	2527.45	706.697
MitomiProbe_mut_107	AAAGCGGTAATTTGCGAAGTGGGTGCAGATATCTAT	77.8477	72.4063	62.4433	80.9834
MitomiProbe_mut_1070	CATACCCAACCTTGTCACGTTACTTAAGATATTTGT	1093.54	999.149	786.531	378.204
MitomiProbe_mut_1071	CATACCCAACCTTGTCACTAAACTTAAGATATTTGT	84.5663	77.2714	88.2431	70.2671
MitomiProbe_mut_1072	CATACCCAACCTTGTCACTACACTTAAGATATTTGT	73.569	86.2223	84.2162	71.593
MitomiProbe_mut_1073	CATACCCAACCTTGTCACTAGACTTAAGATATTTGT	92.954	98.9768	82.9538	79.5739
MitomiProbe_mut_1074	CATACCCAACCTTGTCACTATACTTAAGATATTTGT	77.4125	77.6386	78.5518	69.4141
MitomiProbe_mut_1075	CATACCCAACCTTGTCACTCAACTTAAGATATTTGT	69.0926	79.3256	82	69.6172
MitomiProbe_mut_1076	CATACCCAACCTTGTCACTCCACTTAAGATATTTGT	67.2484	70.1462	68.1667	70.5347
MitomiProbe_mut_1077	CATACCCAACCTTGTCACTCGACTTAAGATATTTGT	89.8182	86.8836	78.9853	64.2541
MitomiProbe_mut_1078	CATACCCAACCTTGTCACTCTACTTAAGATATTTGT	83.0631	78.0316	80.6598	66.6547
MitomiProbe_mut_1079	CATACCCAACCTTGTCACTGAACTTAAGATATTTGT	77.8829	81.6444	86.8213	66.9398
MitomiProbe_mut_108	AAAGCGGTAATTTGCGACGTGGGTGCAGATATCTAT	84.4677	74.7299	70.8373	59.5203
MitomiProbe_mut_1080	CATACCCAACCTTGTCACTGCACTTAAGATATTTGT	94.4877	73.1373	78.519	65.2594
MitomiProbe_mut_1081	CATACCCAACCTTGTCACTGGACTTAAGATATTTGT	107.917	104.519	117.444	103.991
MitomiProbe_mut_1082	CATACCCAACCTTGTCACTGTACTTAAGATATTTGT	68.7901	83.5361	70.6741	71.5239
MitomiProbe_mut_1083	CATACCCAACCTTGTCACTTAACTTAAGATATTTGT	85.699	86.6518	72.4858	67
MitomiProbe_mut_1084	CATACCCAACCTTGTCACTTCACTTAAGATATTTGT	88.3462	76.1397	67.3868	65.1273
MitomiProbe_mut_1085	CATACCCAACCTTGTCACTTGACTTAAGATATTTGT	191.572	213.608	193.086	156.9
MitomiProbe_mut_1086	CATACCCAACCTTGTCACTTTACTTAAGATATTTGT	89.5686	85.8447	88.8821	70.0523
MitomiProbe_mut_1087	CATACCCAACCTTGTCAGGTGGGTGAAGATATTTGT	194.353	163.785	157.51	112.311
MitomiProbe_mut_1088	CATACCCAACCTTGTCATGTGGGTGAAGATATTTGT	224.186	194.515	151.093	72.8205
MitomiProbe_mut_1089	CATACCCAACCTTGTCCAGTGGGTGAAGATATTTGT	69.225	58.7495	63.0614	59.7177
MitomiProbe_mut_109	AAAGCGGTAATTTGCGAGGTGGGTGCAGATATCTAT	74.4792	78.4313	67.3263	70.373
MitomiProbe_mut_1090	CATACCCAACCTTGTCCCGTGGGTGAAGATATTTGT	117.232	124.752	96.2169	69.0938
MitomiProbe_mut_1091	CATACCCAACCTTGTCCGGTGGGTGAAGATATTTGT	61.7711	79.5918	70.7022	47.3242
MitomiProbe_mut_1092	CATACCCAACCTTGTCCTGTGGGTGAAGATATTTGT	62.7238	69.0853	70.422	55.3439
MitomiProbe_mut_1093	CATACCCAACCTTGTCGAGTGGGTGAAGATATTTGT	63.3212	63.3171	64.6381	52.9865
MitomiProbe_mut_1094	CATACCCAACCTTGTCGCGTGGGTGAAGATATTTGT	98.0854	88.8513	67.5329	55.1556
MitomiProbe_mut_1095	CATACCCAACCTTGTCGGGTGGGTGAAGATATTTGT	76.7812	64.2358	75.8818	48.1147
MitomiProbe_mut_1096	CATACCCAACCTTGTCGTGTGGGTGAAGATATTTGT	81.1141	66.818	70.9708	59.1696
MitomiProbe_mut_1097	CATACCCAACCTTGTCTAGTGGGTGAAGATATTTGT	78.8518	77.1957	63.6673	72.6149
MitomiProbe_mut_1098	CATACCCAACCTTGTCTCGTGGGTGAAGATATTTGT	109.074	89.1458	89.6318	57.1471
MitomiProbe_mut_1099	CATACCCAACCTTGTCTGGTGGGTGAAGATATTTGT	72.162	71.6247	67.6247	62.4576
MitomiProbe_mut_11	AAAGCGGTAATTTGAAAGGTGGGTGCAGATATCTAT	63.8551	70.3721	66.3235	68.4098
MitomiProbe_mut_110	AAAGCGGTAATTTGCGATGTGGGTGCAGATATCTAT	75.9146	93.97	81.544	64.4686
MitomiProbe_mut_1100	CATACCCAACCTTGTCTTGTGGGTGAAGATATTTGT	76.5081	64.7818	78.7028	56.8462
MitomiProbe_mut_1101	CATACCCAACCTTGTGAAGTGGGTGAAGATATTTGT	74.9435	69.3782	77.7239	60.8966
MitomiProbe_mut_1102	CATACCCAACCTTGTGACGTGGGTGAAGATATTTGT	102.974	102.389	78.6108	70.2237
MitomiProbe_mut_1103	CATACCCAACCTTGTGAGGTGGGTGAAGATATTTGT	60.9747	60.6975	60.4881	54.9645
MitomiProbe_mut_1104	CATACCCAACCTTGTGATGTGGGTGAAGATATTTGT	83.2825	94.2601	74.1128	73.7677
MitomiProbe_mut_1105	CATACCCAACCTTGTGCAGTGGGTGAAGATATTTGT	73.1613	64.2481	57.2719	52.8735
MitomiProbe_mut_1106	CATACCCAACCTTGTGCCGTGGGTGAAGATATTTGT	68.6028	66.6035	60.0808	49.5161
MitomiProbe_mut_1107	CATACCCAACCTTGTGCGGTGGGTGAAGATATTTGT	63.641	58.9399	62.8234	51.2435
MitomiProbe_mut_1108	CATACCCAACCTTGTGCTGTGGGTGAAGATATTTGT	74.3925	74.458	61.9257	60.8723
MitomiProbe_mut_1109	CATACCCAACCTTGTGGAGTGGGTGAAGATATTTGT	54.1398	77.5109	66.387	56.3462
MitomiProbe_mut_111	AAAGCGGTAATTTGCGCAGTGGGTGCAGATATCTAT	65.936	61.9029	62.8953	49.0768
MitomiProbe_mut_1110	CATACCCAACCTTGTGGCGTGGGTGAAGATATTTGT	59.5467	74.3848	61.5713	54.7674
MitomiProbe_mut_1111	CATACCCAACCTTGTGGGGTGGGTGAAGATATTTGT	72.3954	63.3132	60.2475	54.7057
MitomiProbe_mut_1112	CATACCCAACCTTGTGGTGTGGGTGAAGATATTTGT	77.2254	64.5871	62.8638	51.8743
MitomiProbe_mut_1113	CATACCCAACCTTGTGTAGTGGGTGAAGATATTTGT	72.2513	62.0229	64.7016	62.2732
MitomiProbe_mut_1114	CATACCCAACCTTGTGTCGTGGGTGAAGATATTTGT	68.515	71.6316	54.9766	47.0595
MitomiProbe_mut_1115	CATACCCAACCTTGTGTGGTGGGTGAAGATATTTGT	65.9176	68.6278	56.571	44.4286
MitomiProbe_mut_1116	CATACCCAACCTTGTGTTGTGGGTGAAGATATTTGT	88.9462	79.7444	79.5882	63.0086
MitomiProbe_mut_1117	CATACCCAACCTTGTTAAGTGGGTGAAGATATTTGT	78.7937	75.4002	71.3338	64.1125
MitomiProbe_mut_1118	CATACCCAACCTTGTTACGTGGGTGAAGATATTTGT	72.2291	77.8038	56.2225	47.347
MitomiProbe_mut_1119	CATACCCAACCTTGTTAGGTGGGTGAAGATATTTGT	56.4667	68.993	68.2378	48.3583
MitomiProbe_mut_112	AAAGCGGTAATTTGCGCCGTGGGTGCAGATATCTAT	67.5495	73.734	64.2694	58.8511
MitomiProbe_mut_1120	CATACCCAACCTTGTTATGTGGGTGAAGATATTTGT	74.5333	69.7329	70.5146	57.8949
MitomiProbe_mut_1121	CATACCCAACCTTGTTCAGTGGGTGAAGATATTTGT	75.8312	73.5395	59.9264	60.3331
MitomiProbe_mut_1122	CATACCCAACCTTGTTCCGTGGGTGAAGATATTTGT	69.5226	71.4587	64.08	52.0785
MitomiProbe_mut_1123	CATACCCAACCTTGTTCGGTGGGTGAAGATATTTGT	78.7601	71.3784	63.5956	60.9715
MitomiProbe_mut_1124	CATACCCAACCTTGTTCTGTGGGTGAAGATATTTGT	71.3807	73.2413	75.5178	62.2327
MitomiProbe_mut_1125	CATACCCAACCTTGTTGAGTGGGTGAAGATATTTGT	75.7367	77.1469	78.2453	61.1915
MitomiProbe_mut_1126	CATACCCAACCTTGTTGCGTGGGTGAAGATATTTGT	74.9064	68.7124	78.3609	62.6774
MitomiProbe_mut_1127	CATACCCAACCTTGTTGGGTGGGTGAAGATATTTGT	60.3312	67.5951	68.1567	56.2172
MitomiProbe_mut_1128	CATACCCAACCTTGTTGTGTGGGTGAAGATATTTGT	76.6044	74.8273	62.8889	59.5917
MitomiProbe_mut_1129	CATACCCAACCTTGTTTAGTGGGTGAAGATATTTGT	72.1139	82.6895	74.0892	61.2571
MitomiProbe_mut_113	AAAGCGGTAATTTGCGCGGTGGGTGCAGATATCTAT	72.368	75.7244	71.2934	66.8126
MitomiProbe_mut_1130	CATACCCAACCTTGTTTCGTGGGTGAAGATATTTGT	67.4127	64.3805	71.1411	60.1442
MitomiProbe_mut_1131	CATACCCAACCTTGTTTGGTGGGTGAAGATATTTGT	78.3855	64.0623	63.273	54.625
MitomiProbe_mut_1132	CATACCCAACCTTGTTTTGTGGGTGAAGATATTTGT	82.23	82.2576	79.8344	73.8127
MitomiProbe_mut_1133	CATACCCAACCTTTACACGTGTTTTAAGATATTTGT	1431.36	820.919	263.415	103.268
MitomiProbe_mut_1134	CATACCCAACCTTTCCACGTGTTTTAAGATATTTGT	1022.26	413.754	185.465	73.7329
MitomiProbe_mut_1135	CATACCCAACCTTTGCACGTGTTTTAAGATATTTGT	2529.8	1058.93	262.487	118.082
MitomiProbe_mut_1136	CATACCCAACCTTTTCACGTGAAATAAGATATTTGT	915.173	857.306	565.413	367.053
MitomiProbe_mut_1137	CATACCCAACCTTTTCACGTGAACTAAGATATTTGT	1051.75	1108.07	771.043	325.285
MitomiProbe_mut_1138	CATACCCAACCTTTTCACGTGAAGTAAGATATTTGT	815.158	645.168	407.134	247.947
MitomiProbe_mut_1139	CATACCCAACCTTTTCACGTGAATTAAGATATTTGT	1036.58	821.42	717.984	311.231
MitomiProbe_mut_114	AAAGCGGTAATTTGCGCTGTGGGTGCAGATATCTAT	77.9275	61.0813	57.4679	51.4684
MitomiProbe_mut_1140	CATACCCAACCTTTTCACGTGACATAAGATATTTGT	6068.56	6746.02	6346.76	2967.64
MitomiProbe_mut_1141	CATACCCAACCTTTTCACGTGACCTAAGATATTTGT	10297.3	11224.7	10926	6241.73
MitomiProbe_mut_1142	CATACCCAACCTTTTCACGTGACGTAAGATATTTGT	5633.49	6201.02	5105.95	2547.51
MitomiProbe_mut_1143	CATACCCAACCTTTTCACGTGACTTAAGATATTTGT	6994.95	9091.66	8804.95	4788.6
MitomiProbe_mut_1144	CATACCCAACCTTTTCACGTGAGATAAGATATTTGT	1084.08	897.204	635.24	302.975
MitomiProbe_mut_1145	CATACCCAACCTTTTCACGTGAGCTAAGATATTTGT	1189.71	1133.86	720.805	369.423
MitomiProbe_mut_1146	CATACCCAACCTTTTCACGTGAGGTAAGATATTTGT	1219.71	866.564	707.54	252.822
MitomiProbe_mut_1147	CATACCCAACCTTTTCACGTGAGTTAAGATATTTGT	1108.35	954.353	691.26	277.299
MitomiProbe_mut_1148	CATACCCAACCTTTTCACGTGATATAAGATATTTGT	3789.35	3648.54	3190.74	1257.58
MitomiProbe_mut_1149	CATACCCAACCTTTTCACGTGATCTAAGATATTTGT	6575.73	8448.86	4941.22	4158.66
MitomiProbe_mut_115	AAAGCGGTAATTTGCGGAGTGGGTGCAGATATCTAT	73.8492	69.6259	57.9005	64.7804
MitomiProbe_mut_1150	CATACCCAACCTTTTCACGTGATGTAAGATATTTGT	3722.29	3634.79	3499.73	1564.42
MitomiProbe_mut_1151	CATACCCAACCTTTTCACGTGATTTAAGATATTTGT	3849.61	5579.21	2787.85	2075.18
MitomiProbe_mut_1152	CATACCCAACCTTTTCACGTGCAATAAGATATTTGT	1140.62	790.574	379.364	151.974
MitomiProbe_mut_1153	CATACCCAACCTTTTCACGTGCACTAAGATATTTGT	1429.57	884.018	414.597	162.66
MitomiProbe_mut_1154	CATACCCAACCTTTTCACGTGCAGTAAGATATTTGT	896.847	678.45	291.969	113.526
MitomiProbe_mut_1155	CATACCCAACCTTTTCACGTGCATTAAGATATTTGT	1451.3	897.729	349.411	157.598
MitomiProbe_mut_1156	CATACCCAACCTTTTCACGTGCCATAAGATATTTGT	1552.98	1012.8	349.867	145.833
MitomiProbe_mut_1157	CATACCCAACCTTTTCACGTGCCCTAAGATATTTGT	1207.57	675.876	273.588	118.327
MitomiProbe_mut_1158	CATACCCAACCTTTTCACGTGCCGTAAGATATTTGT	1297.78	679.477	310.47	118.11
MitomiProbe_mut_1159	CATACCCAACCTTTTCACGTGCCTTAAGATATTTGT	1176.51	583.022	353.289	125.405
MitomiProbe_mut_116	AAAGCGGTAATTTGCGGCGTGGGTGCAGATATCTAT	82.2556	72.6538	74.9388	53.9518
MitomiProbe_mut_1160	CATACCCAACCTTTTCACGTGCGATAAGATATTTGT	864.877	588.494	254.457	106.121
MitomiProbe_mut_1161	CATACCCAACCTTTTCACGTGCGCTAAGATATTTGT	933.959	702.916	224.671	99.9224
MitomiProbe_mut_1162	CATACCCAACCTTTTCACGTGCGGTAAGATATTTGT	785.608	562.102	257.704	104.142
MitomiProbe_mut_1163	CATACCCAACCTTTTCACGTGCGTTAAGATATTTGT	963.49	582.722	260.586	90.5376
MitomiProbe_mut_1164	CATACCCAACCTTTTCACGTGCTATAAGATATTTGT	1498.48	833.077	403.605	141.209
MitomiProbe_mut_1165	CATACCCAACCTTTTCACGTGCTCTAAGATATTTGT	1686.72	862.02	471.192	156.139
MitomiProbe_mut_1166	CATACCCAACCTTTTCACGTGCTGTAAGATATTTGT	1155.91	591.342	317.56	122.5
MitomiProbe_mut_1167	CATACCCAACCTTTTCACGTGCTTTAAGATATTTGT	1634	803.809	412.348	145.992
MitomiProbe_mut_1168	CATACCCAACCTTTTCACGTGGAATAAGATATTTGT	656.317	463.799	238.656	115.981
MitomiProbe_mut_1169	CATACCCAACCTTTTCACGTGGACTAAGATATTTGT	1013.39	587.964	267.102	129.229
MitomiProbe_mut_117	AAAGCGGTAATTTGCGGGGTGGGTGCAGATATCTAT	77.5457	89.7498	67.0313	60.0264
MitomiProbe_mut_1170	CATACCCAACCTTTTCACGTGGAGTAAGATATTTGT	573.3	380.079	194.145	98.9961
MitomiProbe_mut_1171	CATACCCAACCTTTTCACGTGGATTAAGATATTTGT	783.708	538.397	268.699	113.747
MitomiProbe_mut_1172	CATACCCAACCTTTTCACGTGGCATAAGATATTTGT	916.421	579.193	264.374	130.637
MitomiProbe_mut_1173	CATACCCAACCTTTTCACGTGGCCTAAGATATTTGT	1062.32	711.817	302.581	111.288
MitomiProbe_mut_1174	CATACCCAACCTTTTCACGTGGCGTAAGATATTTGT	739.786	443.871	206.655	96.4711
MitomiProbe_mut_1175	CATACCCAACCTTTTCACGTGGCTTAAGATATTTGT	932.041	601.195	285.533	110.261
MitomiProbe_mut_1176	CATACCCAACCTTTTCACGTGGGATAAGATATTTGT	866.419	488.216	227.067	91.8712
MitomiProbe_mut_1177	CATACCCAACCTTTTCACGTGGGCTAAGATATTTGT	995.701	460.488	244.658	103.222
MitomiProbe_mut_1178	CATACCCAACCTTTTCACGTGGGGTAAGATATTTGT	948.234	397.334	195.103	93.9484
MitomiProbe_mut_1179	CATACCCAACCTTTTCACGTGGGTTAAGATATTTGT	961.901	506.547	213.639	109.09
MitomiProbe_mut_118	AAAGCGGTAATTTGCGGTGTGGGTGCAGATATCTAT	75.6437	72.6454	71.5333	65.8608
MitomiProbe_mut_1180	CATACCCAACCTTTTCACGTGGTATAAGATATTTGT	1179.86	856.041	378.845	156.475
MitomiProbe_mut_1181	CATACCCAACCTTTTCACGTGGTCTAAGATATTTGT	2111.67	1194.57	502.17	171
MitomiProbe_mut_1182	CATACCCAACCTTTTCACGTGGTGTAAGATATTTGT	1079.6	755.229	357.274	108.116
MitomiProbe_mut_1183	CATACCCAACCTTTTCACGTGGTTTAAGATATTTGT	1452.25	1004.38	443.597	139.757
MitomiProbe_mut_1184	CATACCCAACCTTTTCACGTGTAATAAGATATTTGT	884.683	765.36	391.761	168.023
MitomiProbe_mut_1185	CATACCCAACCTTTTCACGTGTACTAAGATATTTGT	1153.38	755.855	349.527	143.185
MitomiProbe_mut_1186	CATACCCAACCTTTTCACGTGTAGTAAGATATTTGT	730.17	634.75	282.035	128.221
MitomiProbe_mut_1187	CATACCCAACCTTTTCACGTGTATTAAGATATTTGT	992.804	629.163	367.619	129.627
MitomiProbe_mut_1188	CATACCCAACCTTTTCACGTGTCATAAGATATTTGT	1150.83	849.545	403.547	173.958
MitomiProbe_mut_1189	CATACCCAACCTTTTCACGTGTCCTAAGATATTTGT	1301.61	902.394	421.2	152.415
MitomiProbe_mut_119	AAAGCGGTAATTTGCGTAGTGGGTGCAGATATCTAT	84.3759	78.7156	67.6417	73.931
MitomiProbe_mut_1190	CATACCCAACCTTTTCACGTGTCGTAAGATATTTGT	834.85	694.39	357.589	121.67
MitomiProbe_mut_1191	CATACCCAACCTTTTCACGTGTCTTAAGATATTTGT	1322.27	765.396	411.071	138.059
MitomiProbe_mut_1192	CATACCCAACCTTTTCACGTGTGATAAGATATTTGT	715.998	576.996	270.107	143.675
MitomiProbe_mut_1193	CATACCCAACCTTTTCACGTGTGCTAAGATATTTGT	831.304	602.989	285.551	131.91
MitomiProbe_mut_1194	CATACCCAACCTTTTCACGTGTGGTAAGATATTTGT	691.689	425.482	284.711	123.633
MitomiProbe_mut_1195	CATACCCAACCTTTTCACGTGTGTTAAGATATTTGT	973.482	559.219	333.635	110.792
MitomiProbe_mut_1196	CATACCCAACCTTTTCACGTGTTATAAGATATTTGT	1159.14	816.287	457.923	166.162
MitomiProbe_mut_1197	CATACCCAACCTTTTCACGTGTTCTAAGATATTTGT	1495.5	831.763	443.316	166.743
MitomiProbe_mut_1198	CATACCCAACCTTTTCACGTGTTGTAAGATATTTGT	996.94	604.649	378.828	156.644
MitomiProbe_mut_1199	CATACCCAACCTTTTCACGTGTTTTAAGATATTTGT	1179.68	786.478	390.32	158.341
MitomiProbe_mut_12	AAAGCGGTAATTTGAAATGTGGGTGCAGATATCTAT	74.7028	71.5655	74.558	66.3464
MitomiProbe_mut_120	AAAGCGGTAATTTGCGTCGTGGGTGCAGATATCTAT	73.1649	79.7967	58.3301	58.4207
MitomiProbe_mut_1200	CATACCCAACCTTTTCACGTGTTTTAAGATATTTGT	1266.38	695.812	392.4	153.265
MitomiProbe_mut_1201	CGGGGTTAAGTTTAACACGTGTTTTGCTTGCAGCAG	1413.17	825.383	249.718	101.204
MitomiProbe_mut_1202	CGGGGTTAAGTTTACCACGTGTTTTGCTTGCAGCAG	1261.51	549.113	194.957	87.2887
MitomiProbe_mut_1203	CGGGGTTAAGTTTAGCACGTGTTTTGCTTGCAGCAG	1686.98	1062.87	225.421	89.5722
MitomiProbe_mut_1204	CGGGGTTAAGTTTATCACGTGTTTTGCTTGCAGCAG	3688.82	3340.63	1181.74	471.804
MitomiProbe_mut_1205	CGGGGTTAAGTTTCACACGTGTTTTGCTTGCAGCAG	677.793	475.51	199.717	97.4847
MitomiProbe_mut_1206	CGGGGTTAAGTTTCCCACGTGTTTTGCTTGCAGCAG	523.522	440.269	116.287	81.0893
MitomiProbe_mut_1207	CGGGGTTAAGTTTCGCACGTGTTTTGCTTGCAGCAG	845.903	522.754	212.61	89.25
MitomiProbe_mut_1208	CGGGGTTAAGTTTCTCACGTGTTTTGCTTGCAGCAG	969.516	747.346	382.368	154.341
MitomiProbe_mut_1209	CGGGGTTAAGTTTGAAAAGTGGGTGGCTTGCAGCAG	58.6595	75.004	56.0508	59.1968
MitomiProbe_mut_121	AAAGCGGTAATTTGCGTGGTGGGTGCAGATATCTAT	80.1227	77.0931	66.8148	61.9504
MitomiProbe_mut_1210	CGGGGTTAAGTTTGAAACGTGGGTGGCTTGCAGCAG	91.4389	80.2386	63.5098	55.8121
MitomiProbe_mut_1211	CGGGGTTAAGTTTGAAAGGTGGGTGGCTTGCAGCAG	54.1749	70.4583	57.9901	42.9989
MitomiProbe_mut_1212	CGGGGTTAAGTTTGAAATGTGGGTGGCTTGCAGCAG	80.231	70.8792	50.889	43.9383
MitomiProbe_mut_1213	CGGGGTTAAGTTTGAACAGTGGGTGGCTTGCAGCAG	75.7113	77.5571	71.3474	44.5153
MitomiProbe_mut_1214	CGGGGTTAAGTTTGAACCGTGGGTGGCTTGCAGCAG	56.6258	61.6372	54.3348	56.0134
MitomiProbe_mut_1215	CGGGGTTAAGTTTGAACGGTGGGTGGCTTGCAGCAG	63.5636	78.9378	67.8979	45.9096
MitomiProbe_mut_1216	CGGGGTTAAGTTTGAACTGTGGGTGGCTTGCAGCAG	68.769	68.028	68.1049	55.255
MitomiProbe_mut_1217	CGGGGTTAAGTTTGAAGAGTGGGTGGCTTGCAGCAG	57.1018	68.477	58.1981	46.7793
MitomiProbe_mut_1218	CGGGGTTAAGTTTGAAGCGTGGGTGGCTTGCAGCAG	61.5957	74.7954	66.2961	53.6712
MitomiProbe_mut_1219	CGGGGTTAAGTTTGAAGGGTGGGTGGCTTGCAGCAG	75.0236	80.2046	58.9121	50.0089
MitomiProbe_mut_122	AAAGCGGTAATTTGCGTTGTGGGTGCAGATATCTAT	87.1404	76.7007	78.3294	64.3694
MitomiProbe_mut_1220	CGGGGTTAAGTTTGAAGTGTGGGTGGCTTGCAGCAG	79.1223	75.8878	66.4556	57.825
MitomiProbe_mut_1221	CGGGGTTAAGTTTGAATAGTGGGTGGCTTGCAGCAG	64.3316	63.6764	58.6285	75.578
MitomiProbe_mut_1222	CGGGGTTAAGTTTGAATCGTGGGTGGCTTGCAGCAG	71.7765	63.3372	63.5548	50.8131
MitomiProbe_mut_1223	CGGGGTTAAGTTTGAATGGTGGGTGGCTTGCAGCAG	66.9471	61.3852	52.5737	42.4234
MitomiProbe_mut_1224	CGGGGTTAAGTTTGAATTGTGGGTGGCTTGCAGCAG	70.7183	65.3068	60.1948	48.1837
MitomiProbe_mut_1225	CGGGGTTAAGTTTGACAAGTGGGTGGCTTGCAGCAG	64.9645	71.2746	62.7294	48.5052
MitomiProbe_mut_1226	CGGGGTTAAGTTTGACACGTGGGTGGCTTGCAGCAG	827.061	307.042	152.132	59.9068
MitomiProbe_mut_1227	CGGGGTTAAGTTTGACACGTGTTTTGCTTGCAGCAG	1296.31	667.766	282.08	100.716
MitomiProbe_mut_1228	CGGGGTTAAGTTTGACAGGTGGGTGGCTTGCAGCAG	62.9018	71.3032	55.4872	51.337
MitomiProbe_mut_1229	CGGGGTTAAGTTTGACATGTGGGTGGCTTGCAGCAG	84.1901	88.4834	67.6258	54.4774
MitomiProbe_mut_123	AAAGCGGTAATTTGCTAAGTGGGTGCAGATATCTAT	64.7632	71.9221	60.3615	60.1431
MitomiProbe_mut_1230	CGGGGTTAAGTTTGACCAGTGGGTGGCTTGCAGCAG	61.2578	59.4215	70.3154	46.5996
MitomiProbe_mut_1231	CGGGGTTAAGTTTGACCCGTGGGTGGCTTGCAGCAG	81.8289	68.9199	72.7092	54.098
MitomiProbe_mut_1232	CGGGGTTAAGTTTGACCGGTGGGTGGCTTGCAGCAG	62.9761	66.4326	48.9794	48.8028
MitomiProbe_mut_1233	CGGGGTTAAGTTTGACCTGTGGGTGGCTTGCAGCAG	61.0592	50.7913	62.4413	50.25
MitomiProbe_mut_1234	CGGGGTTAAGTTTGACGAGTGGGTGGCTTGCAGCAG	64.1166	66.4712	64.9797	46.3628
MitomiProbe_mut_1235	CGGGGTTAAGTTTGACGCGTGGGTGGCTTGCAGCAG	79.2657	80.4423	58.6285	58.5916
MitomiProbe_mut_1236	CGGGGTTAAGTTTGACGGGTGGGTGGCTTGCAGCAG	68.3901	65.9786	71.1405	47.502
MitomiProbe_mut_1237	CGGGGTTAAGTTTGACGTGTGGGTGGCTTGCAGCAG	67.6206	70.757	63.0497	48.5042
MitomiProbe_mut_1238	CGGGGTTAAGTTTGACTAGTGGGTGGCTTGCAGCAG	80.4612	62.7367	53.7162	50.9929
MitomiProbe_mut_1239	CGGGGTTAAGTTTGACTCGTGGGTGGCTTGCAGCAG	83.6486	72.718	60.68	47.9784
MitomiProbe_mut_124	AAAGCGGTAATTTGCTACGTGGGTGCAGATATCTAT	78.991	69.7396	70.6215	72.2788
MitomiProbe_mut_1240	CGGGGTTAAGTTTGACTGGTGGGTGGCTTGCAGCAG	76.7164	67.2621	61.2256	53.3248
MitomiProbe_mut_1241	CGGGGTTAAGTTTGACTTGTGGGTGGCTTGCAGCAG	74.51	64.1022	52.3985	38.5496
MitomiProbe_mut_1242	CGGGGTTAAGTTTGAGAAGTGGGTGGCTTGCAGCAG	62.3297	64.8677	63.1377	65.2306
MitomiProbe_mut_1243	CGGGGTTAAGTTTGAGACGTGGGTGGCTTGCAGCAG	77.1396	48.7106	68.25	38.0056
MitomiProbe_mut_1244	CGGGGTTAAGTTTGAGAGGTGGGTGGCTTGCAGCAG	79.3396	67.1181	57.3385	46.79
MitomiProbe_mut_1245	CGGGGTTAAGTTTGAGATGTGGGTGGCTTGCAGCAG	66.4767	69.5438	61.4733	54.2816
MitomiProbe_mut_1246	CGGGGTTAAGTTTGAGCAGTGGGTGGCTTGCAGCAG	60.271	55.1262	60.9292	40.6405
MitomiProbe_mut_1247	CGGGGTTAAGTTTGAGCCGTGGGTGGCTTGCAGCAG	55.5395	73.2941	52.6204	48.9071
MitomiProbe_mut_1248	CGGGGTTAAGTTTGAGCGGTGGGTGGCTTGCAGCAG	54.0788	70.2668	57.5052	52.125
MitomiProbe_mut_1249	CGGGGTTAAGTTTGAGCTGTGGGTGGCTTGCAGCAG	67.3485	50.9305	54.3073	54.2801
MitomiProbe_mut_125	AAAGCGGTAATTTGCTAGGTGGGTGCAGATATCTAT	81.2819	79.1272	65.7905	64.3828
MitomiProbe_mut_1250	CGGGGTTAAGTTTGAGGAGTGGGTGGCTTGCAGCAG	74.3943	79.8981	70.4205	47.5547
MitomiProbe_mut_1251	CGGGGTTAAGTTTGAGGCGTGGGTGGCTTGCAGCAG	82.6296	76.0834	73.7089	44.1998
MitomiProbe_mut_1252	CGGGGTTAAGTTTGAGGGGTGGGTGGCTTGCAGCAG	77.2594	71.6684	73.6642	52.6355
MitomiProbe_mut_1253	CGGGGTTAAGTTTGAGGTGTGGGTGGCTTGCAGCAG	69.2052	59.1478	68.1986	41.5135
MitomiProbe_mut_1254	CGGGGTTAAGTTTGAGTAGTGGGTGGCTTGCAGCAG	71.2015	70.4886	66.7264	63.3058
MitomiProbe_mut_1255	CGGGGTTAAGTTTGAGTCGTGGGTGGCTTGCAGCAG	76.6016	64.5955	62.3376	53.5279
MitomiProbe_mut_1256	CGGGGTTAAGTTTGAGTGGTGGGTGGCTTGCAGCAG	71.6459	66.6714	65.0188	42.4485
MitomiProbe_mut_1257	CGGGGTTAAGTTTGAGTTGTGGGTGGCTTGCAGCAG	69.1841	61.8903	63.3397	52.0249
MitomiProbe_mut_1258	CGGGGTTAAGTTTGATAAGTGGGTGGCTTGCAGCAG	70.4411	61.7005	55.0023	48.4399
MitomiProbe_mut_1259	CGGGGTTAAGTTTGATACGTGGGTGGCTTGCAGCAG	63.2977	71.0053	60.4487	40.8739
MitomiProbe_mut_126	AAAGCGGTAATTTGCTATGTGGGTGCAGATATCTAT	77.5486	77.4784	76.1702	66.4736
MitomiProbe_mut_1260	CGGGGTTAAGTTTGATAGGTGGGTGGCTTGCAGCAG	63.108	60.8027	59.9526	59.2059
MitomiProbe_mut_1261	CGGGGTTAAGTTTGATATGTGGGTGGCTTGCAGCAG	55.4096	66.5574	64.1014	50.6488
MitomiProbe_mut_1262	CGGGGTTAAGTTTGATCAGTGGGTGGCTTGCAGCAG	76.8932	73.3023	73.038	52.2138
MitomiProbe_mut_1263	CGGGGTTAAGTTTGATCCGTGGGTGGCTTGCAGCAG	78.3175	58.6777	62.3572	42.8394
MitomiProbe_mut_1264	CGGGGTTAAGTTTGATCGGTGGGTGGCTTGCAGCAG	80.0186	68.06	61.9067	55.3526
MitomiProbe_mut_1265	CGGGGTTAAGTTTGATCTGTGGGTGGCTTGCAGCAG	72.217	66.1207	58.8224	50.4764
MitomiProbe_mut_1266	CGGGGTTAAGTTTGATGAGTGGGTGGCTTGCAGCAG	71.6676	72.3234	60.0856	55.5091
MitomiProbe_mut_1267	CGGGGTTAAGTTTGATGCGTGGGTGGCTTGCAGCAG	89.2722	69.9784	66.3214	55.4146
MitomiProbe_mut_1268	CGGGGTTAAGTTTGATGGGTGGGTGGCTTGCAGCAG	73.0377	58.4484	55.6254	55.4545
MitomiProbe_mut_1269	CGGGGTTAAGTTTGATGTGTGGGTGGCTTGCAGCAG	61.5656	73.8828	60.5839	43.2359
MitomiProbe_mut_127	AAAGCGGTAATTTGCTCAGTGGGTGCAGATATCTAT	68.7483	78.854	70.2393	57.998
MitomiProbe_mut_1270	CGGGGTTAAGTTTGATTAGTGGGTGGCTTGCAGCAG	76.4419	75.3077	74.4253	60.8125
MitomiProbe_mut_1271	CGGGGTTAAGTTTGATTCGTGGGTGGCTTGCAGCAG	68.6833	63.6831	62.5513	52.91
MitomiProbe_mut_1272	CGGGGTTAAGTTTGATTGGTGGGTGGCTTGCAGCAG	74.9874	70.3322	58.0468	49.9754
MitomiProbe_mut_1273	CGGGGTTAAGTTTGATTTGTGGGTGGCTTGCAGCAG	67.9681	62.6061	67.3673	56.8016
MitomiProbe_mut_1274	CGGGGTTAAGTTTGCAAAGTGGGTGGCTTGCAGCAG	70.1685	64.8491	58.8904	51.6264
MitomiProbe_mut_1275	CGGGGTTAAGTTTGCAACGTGGGTGGCTTGCAGCAG	92.2938	70.2452	71.9142	66.3378
MitomiProbe_mut_1276	CGGGGTTAAGTTTGCAAGGTGGGTGGCTTGCAGCAG	63.5532	54.0781	51.0722	54.5918
MitomiProbe_mut_1277	CGGGGTTAAGTTTGCAATGTGGGTGGCTTGCAGCAG	85.412	65.0876	53.1436	48.6579
MitomiProbe_mut_1278	CGGGGTTAAGTTTGCACAGTGGGTGGCTTGCAGCAG	83.0139	68.9544	69.8463	51.7884
MitomiProbe_mut_1279	CGGGGTTAAGTTTGCACCGTGGGTGGCTTGCAGCAG	73.9577	61.6667	59.7582	54.6369
MitomiProbe_mut_128	AAAGCGGTAATTTGCTCCGTGGGTGCAGATATCTAT	82.2513	73.3005	67.6129	67.6247
MitomiProbe_mut_1280	CGGGGTTAAGTTTGCACGGTGGGTGGCTTGCAGCAG	70.1643	55.6692	58.7297	53.4405
MitomiProbe_mut_1281	CGGGGTTAAGTTTGCACTGTGGGTGGCTTGCAGCAG	75.6156	63.3375	60.4777	46.2817
MitomiProbe_mut_1282	CGGGGTTAAGTTTGCAGAGTGGGTGGCTTGCAGCAG	65.0238	64.3067	60.6575	46.0574
MitomiProbe_mut_1283	CGGGGTTAAGTTTGCAGCGTGGGTGGCTTGCAGCAG	62.2255	63.1466	57.7316	51.5347
MitomiProbe_mut_1284	CGGGGTTAAGTTTGCAGGGTGGGTGGCTTGCAGCAG	70.8299	63.2708	64.3841	48.3812
MitomiProbe_mut_1285	CGGGGTTAAGTTTGCAGTGTGGGTGGCTTGCAGCAG	79.6422	67.9705	59.5476	47.5361
MitomiProbe_mut_1286	CGGGGTTAAGTTTGCATAGTGGGTGGCTTGCAGCAG	70.3058	58.8036	62.7472	49.3712
MitomiProbe_mut_1287	CGGGGTTAAGTTTGCATCGTGGGTGGCTTGCAGCAG	75.5749	59.9706	66.7853	49.3668
MitomiProbe_mut_1288	CGGGGTTAAGTTTGCATGGTGGGTGGCTTGCAGCAG	64.8375	60.5384	63.8322	50.0601
MitomiProbe_mut_1289	CGGGGTTAAGTTTGCATTGTGGGTGGCTTGCAGCAG	74.5618	70.7903	67.2513	54.3976
MitomiProbe_mut_129	AAAGCGGTAATTTGCTCGGTGGGTGCAGATATCTAT	81.25	71.196	58.1277	65.5192
MitomiProbe_mut_1290	CGGGGTTAAGTTTGCCAAGTGGGTGGCTTGCAGCAG	62.206	68.053	54.6833	50.9641
MitomiProbe_mut_1291	CGGGGTTAAGTTTGCCACGTGGGTGGCTTGCAGCAG	579.556	367.29	123.038	62.879
MitomiProbe_mut_1292	CGGGGTTAAGTTTGCCACGTGTTTTGCTTGCAGCAG	1001.27	490.498	159.189	74.2946
MitomiProbe_mut_1293	CGGGGTTAAGTTTGCCAGGTGGGTGGCTTGCAGCAG	64.26	54.3558	73.6285	40.7729
MitomiProbe_mut_1294	CGGGGTTAAGTTTGCCATGTGGGTGGCTTGCAGCAG	73.5465	67.4166	65.4033	46.9893
MitomiProbe_mut_1295	CGGGGTTAAGTTTGCCCAGTGGGTGGCTTGCAGCAG	44.9765	57.5059	67.1678	44.1038
MitomiProbe_mut_1296	CGGGGTTAAGTTTGCCCCGTGGGTGGCTTGCAGCAG	72.6179	55.5168	58.6154	42.1554
MitomiProbe_mut_1297	CGGGGTTAAGTTTGCCCGGTGGGTGGCTTGCAGCAG	58.4425	59.7922	54.6882	52.7605
MitomiProbe_mut_1298	CGGGGTTAAGTTTGCCCTGTGGGTGGCTTGCAGCAG	64.2201	60.2226	64.8682	48.0251
MitomiProbe_mut_1299	CGGGGTTAAGTTTGCCGAGTGGGTGGCTTGCAGCAG	76.9176	59.8484	67.4814	53.9026
MitomiProbe_mut_13	AAAGCGGTAATTTGAACAGTGGGTGCAGATATCTAT	80.9289	78.7566	60.3265	67.4556
MitomiProbe_mut_130	AAAGCGGTAATTTGCTCTGTGGGTGCAGATATCTAT	84.5172	87.8422	68.5286	67.8545
MitomiProbe_mut_1300	CGGGGTTAAGTTTGCCGCGTGGGTGGCTTGCAGCAG	74.0886	74.8132	60.3398	47.6897
MitomiProbe_mut_1301	CGGGGTTAAGTTTGCCGGGTGGGTGGCTTGCAGCAG	62.6337	62.6959	60.7887	39.0811
MitomiProbe_mut_1302	CGGGGTTAAGTTTGCCGTGTGGGTGGCTTGCAGCAG	54.2618	56.7466	54.0213	48.9978
MitomiProbe_mut_1303	CGGGGTTAAGTTTGCCTAGTGGGTGGCTTGCAGCAG	67.3036	60.9182	49.9465	45.3913
MitomiProbe_mut_1304	CGGGGTTAAGTTTGCCTCGTGGGTGGCTTGCAGCAG	83.3291	101.266	75.0688	52.3405
MitomiProbe_mut_1305	CGGGGTTAAGTTTGCCTGGTGGGTGGCTTGCAGCAG	60.9804	54.269	69.2469	43.3107
MitomiProbe_mut_1306	CGGGGTTAAGTTTGCCTTGTGGGTGGCTTGCAGCAG	80.4325	65.8575	73.6617	56.6657
MitomiProbe_mut_1307	CGGGGTTAAGTTTGCGAAGTGGGTGGCTTGCAGCAG	75.8767	61.4499	62.7216	55.8099
MitomiProbe_mut_1308	CGGGGTTAAGTTTGCGACGTGGGTGGCTTGCAGCAG	63.7068	64.664	73.1247	51.7274
MitomiProbe_mut_1309	CGGGGTTAAGTTTGCGAGGTGGGTGGCTTGCAGCAG	62.3715	67.3808	58.29	59.6789
MitomiProbe_mut_131	AAAGCGGTAATTTGCTGAGTGGGTGCAGATATCTAT	87.36	97.4021	79.439	60.4889
MitomiProbe_mut_1310	CGGGGTTAAGTTTGCGATGTGGGTGGCTTGCAGCAG	59.7892	66.8716	61.24	60.6248
MitomiProbe_mut_1311	CGGGGTTAAGTTTGCGCAGTGGGTGGCTTGCAGCAG	72.8	57.3353	59.276	55.7719
MitomiProbe_mut_1312	CGGGGTTAAGTTTGCGCCGTGGGTGGCTTGCAGCAG	71.2611	62.6435	57.3931	57.6574
MitomiProbe_mut_1313	CGGGGTTAAGTTTGCGCGGTGGGTGGCTTGCAGCAG	56.8065	73.4612	74.9113	54.3904
MitomiProbe_mut_1314	CGGGGTTAAGTTTGCGCTGTGGGTGGCTTGCAGCAG	78.9643	59.8197	65.3032	58.8788
MitomiProbe_mut_1315	CGGGGTTAAGTTTGCGGAGTGGGTGGCTTGCAGCAG	59.0859	65.5596	54.1607	52.9944
MitomiProbe_mut_1316	CGGGGTTAAGTTTGCGGCGTGGGTGGCTTGCAGCAG	65.1077	58.8538	59.5307	40.4912
MitomiProbe_mut_1317	CGGGGTTAAGTTTGCGGGGTGGGTGGCTTGCAGCAG	83.7039	69.8219	73.2379	58.3787
MitomiProbe_mut_1318	CGGGGTTAAGTTTGCGGTGTGGGTGGCTTGCAGCAG	63.9791	71.8334	63.0504	49.1424
MitomiProbe_mut_1319	CGGGGTTAAGTTTGCGTAGTGGGTGGCTTGCAGCAG	65.6895	62.8106	59.2262	58.4907
MitomiProbe_mut_132	AAAGCGGTAATTTGCTGCGTGGGTGCAGATATCTAT	71.432	84.2359	64.7731	63.7409
MitomiProbe_mut_1320	CGGGGTTAAGTTTGCGTCGTGGGTGGCTTGCAGCAG	69.3333	70.7344	58.2568	54.9232
MitomiProbe_mut_1321	CGGGGTTAAGTTTGCGTGGTGGGTGGCTTGCAGCAG	64.8503	63.9882	57.3918	58.6339
MitomiProbe_mut_1322	CGGGGTTAAGTTTGCGTTGTGGGTGGCTTGCAGCAG	93.5825	71.0481	69.2202	47.9369
MitomiProbe_mut_1323	CGGGGTTAAGTTTGCTAAGTGGGTGGCTTGCAGCAG	89.7616	82.2161	64.0167	66.8435
MitomiProbe_mut_1324	CGGGGTTAAGTTTGCTACGTGGGTGGCTTGCAGCAG	71.6779	61.137	67.2675	49.95
MitomiProbe_mut_1325	CGGGGTTAAGTTTGCTAGGTGGGTGGCTTGCAGCAG	73.7841	58.7659	54.3849	53.7275
MitomiProbe_mut_1326	CGGGGTTAAGTTTGCTATGTGGGTGGCTTGCAGCAG	74.2233	66.4527	68.2957	49.1642
MitomiProbe_mut_1327	CGGGGTTAAGTTTGCTCAGTGGGTGGCTTGCAGCAG	69.7808	70.64	63.9405	65.1164
MitomiProbe_mut_1328	CGGGGTTAAGTTTGCTCCGTGGGTGGCTTGCAGCAG	59.1632	56.0444	59.05	52.3296
MitomiProbe_mut_1329	CGGGGTTAAGTTTGCTCGGTGGGTGGCTTGCAGCAG	69.2819	75.0366	62.1386	54.4973
MitomiProbe_mut_133	AAAGCGGTAATTTGCTGGGTGGGTGCAGATATCTAT	69.271	76.9994	72.9279	66.0078
MitomiProbe_mut_1330	CGGGGTTAAGTTTGCTCTGTGGGTGGCTTGCAGCAG	71.2824	72.8061	45.1098	60.207
MitomiProbe_mut_1331	CGGGGTTAAGTTTGCTGAGTGGGTGGCTTGCAGCAG	68.2561	59.0586	57.8749	58.37
MitomiProbe_mut_1332	CGGGGTTAAGTTTGCTGCGTGGGTGGCTTGCAGCAG	71.5202	59.1237	57.801	47.1869
MitomiProbe_mut_1333	CGGGGTTAAGTTTGCTGGGTGGGTGGCTTGCAGCAG	68.4051	70.1685	64.3288	42.5988
MitomiProbe_mut_1334	CGGGGTTAAGTTTGCTGTGTGGGTGGCTTGCAGCAG	54.6111	68.0167	56.5217	47.103
MitomiProbe_mut_1335	CGGGGTTAAGTTTGCTTAGTGGGTGGCTTGCAGCAG	82.0252	50.9595	59.2422	60.8594
MitomiProbe_mut_1336	CGGGGTTAAGTTTGCTTCGTGGGTGGCTTGCAGCAG	62.6373	56.3595	58.8627	51.4474
MitomiProbe_mut_1337	CGGGGTTAAGTTTGCTTGGTGGGTGGCTTGCAGCAG	63.9209	58.0775	51.9265	52.4031
MitomiProbe_mut_1338	CGGGGTTAAGTTTGCTTTGTGGGTGGCTTGCAGCAG	79.2536	83.5	66.5647	53.6111
MitomiProbe_mut_1339	CGGGGTTAAGTTTGGAAAGTGGGTGGCTTGCAGCAG	64.606	66.388	62.5616	48.0043
MitomiProbe_mut_134	AAAGCGGTAATTTGCTGTGTGGGTGCAGATATCTAT	74.2379	75.5298	76.6125	64.8652
MitomiProbe_mut_1340	CGGGGTTAAGTTTGGAACGTGGGTGGCTTGCAGCAG	69.2081	80.967	82.2986	60.8221
MitomiProbe_mut_1341	CGGGGTTAAGTTTGGAAGGTGGGTGGCTTGCAGCAG	75.8389	75.9325	58.3762	49.3607
MitomiProbe_mut_1342	CGGGGTTAAGTTTGGAATGTGGGTGGCTTGCAGCAG	66.4042	75.73	55.2874	51.3857
MitomiProbe_mut_1343	CGGGGTTAAGTTTGGACAGTGGGTGGCTTGCAGCAG	71.259	65.0557	62.8635	61.0623
MitomiProbe_mut_1344	CGGGGTTAAGTTTGGACCGTGGGTGGCTTGCAGCAG	63.972	40.9701	56.1753	51.0599
MitomiProbe_mut_1345	CGGGGTTAAGTTTGGACGGTGGGTGGCTTGCAGCAG	59.7166	68.6213	60.6785	54.3745
MitomiProbe_mut_1346	CGGGGTTAAGTTTGGACTGTGGGTGGCTTGCAGCAG	78.9446	59.0311	60.7469	53.3869
MitomiProbe_mut_1347	CGGGGTTAAGTTTGGAGAGTGGGTGGCTTGCAGCAG	70.0849	76.2062	62.0545	52.4894
MitomiProbe_mut_1348	CGGGGTTAAGTTTGGAGCGTGGGTGGCTTGCAGCAG	84.8009	65.5529	58.4221	49.367
MitomiProbe_mut_1349	CGGGGTTAAGTTTGGAGGGTGGGTGGCTTGCAGCAG	84.5915	73.0099	71.6897	50.4301
MitomiProbe_mut_135	AAAGCGGTAATTTGCTTAGTGGGTGCAGATATCTAT	71.5239	92.5746	80.0917	73.2846
MitomiProbe_mut_1350	CGGGGTTAAGTTTGGAGTGTGGGTGGCTTGCAGCAG	73.028	69.3524	76.6348	63.4107
MitomiProbe_mut_1351	CGGGGTTAAGTTTGGATAGTGGGTGGCTTGCAGCAG	67.0541	66.4129	66.6193	57.0719
MitomiProbe_mut_1352	CGGGGTTAAGTTTGGATCGTGGGTGGCTTGCAGCAG	78.5488	61.9141	61.4682	50.4044
MitomiProbe_mut_1353	CGGGGTTAAGTTTGGATGGTGGGTGGCTTGCAGCAG	47.8275	55.9324	53.6836	48.7091
MitomiProbe_mut_1354	CGGGGTTAAGTTTGGATTGTGGGTGGCTTGCAGCAG	65.1457	64.281	57.3307	56.3245
MitomiProbe_mut_1355	CGGGGTTAAGTTTGGCAAGTGGGTGGCTTGCAGCAG	81.4273	62.8511	66.4071	51.9301
MitomiProbe_mut_1356	CGGGGTTAAGTTTGGCACGTGGGTGGCTTGCAGCAG	978.324	461.708	127.804	69.7168
MitomiProbe_mut_1357	CGGGGTTAAGTTTGGCACGTGTTTTGCTTGCAGCAG	1345.2	877.521	227.579	93.6552
MitomiProbe_mut_1358	CGGGGTTAAGTTTGGCAGGTGGGTGGCTTGCAGCAG	71.5172	68.9082	64.322	58.2443
MitomiProbe_mut_1359	CGGGGTTAAGTTTGGCATGTGGGTGGCTTGCAGCAG	84.7147	81.7846	64.57	51.3086
MitomiProbe_mut_136	AAAGCGGTAATTTGCTTCGTGGGTGCAGATATCTAT	78.0704	73.0163	62.3425	56.1553
MitomiProbe_mut_1360	CGGGGTTAAGTTTGGCCAGTGGGTGGCTTGCAGCAG	59.3068	59.7719	61.9277	57.4262
MitomiProbe_mut_1361	CGGGGTTAAGTTTGGCCCGTGGGTGGCTTGCAGCAG	64.4571	62.8345	63.0379	37.6938
MitomiProbe_mut_1362	CGGGGTTAAGTTTGGCCGGTGGGTGGCTTGCAGCAG	80.7388	53.2825	51.8194	43.8825
MitomiProbe_mut_1363	CGGGGTTAAGTTTGGCCTGTGGGTGGCTTGCAGCAG	53.1868	44.1987	50.907	46.0625
MitomiProbe_mut_1364	CGGGGTTAAGTTTGGCGAGTGGGTGGCTTGCAGCAG	68.026	62.0459	64.7877	55.3898
MitomiProbe_mut_1365	CGGGGTTAAGTTTGGCGCGTGGGTGGCTTGCAGCAG	96.2282	88.1134	67.3635	59.7136
MitomiProbe_mut_1366	CGGGGTTAAGTTTGGCGGGTGGGTGGCTTGCAGCAG	62.2286	67.195	72.1845	48.92
MitomiProbe_mut_1367	CGGGGTTAAGTTTGGCGTGTGGGTGGCTTGCAGCAG	73.4037	63.5874	68.0491	48.6243
MitomiProbe_mut_1368	CGGGGTTAAGTTTGGCTAGTGGGTGGCTTGCAGCAG	69.2348	57.4069	65.484	46.1853
MitomiProbe_mut_1369	CGGGGTTAAGTTTGGCTCGTGGGTGGCTTGCAGCAG	80.8683	72.1378	65.518	48.6447
MitomiProbe_mut_137	AAAGCGGTAATTTGCTTGGTGGGTGCAGATATCTAT	68.0599	88.6266	59.1653	59.4184
MitomiProbe_mut_1370	CGGGGTTAAGTTTGGCTGGTGGGTGGCTTGCAGCAG	63.2024	60.4949	65.5063	49.7402
MitomiProbe_mut_1371	CGGGGTTAAGTTTGGCTTGTGGGTGGCTTGCAGCAG	56.4375	61.5247	54.5608	59.9928
MitomiProbe_mut_1372	CGGGGTTAAGTTTGGGAAGTGGGTGGCTTGCAGCAG	68.1056	57.9427	70.4811	51.7788
MitomiProbe_mut_1373	CGGGGTTAAGTTTGGGACGTGGGTGGCTTGCAGCAG	53.9415	57.9302	64.5496	48.5805
MitomiProbe_mut_1374	CGGGGTTAAGTTTGGGAGGTGGGTGGCTTGCAGCAG	71.3395	78.2266	59.1775	40.4733
MitomiProbe_mut_1375	CGGGGTTAAGTTTGGGATGTGGGTGGCTTGCAGCAG	63.8845	53.3297	50.4984	46.4627
MitomiProbe_mut_1376	CGGGGTTAAGTTTGGGCAGTGGGTGGCTTGCAGCAG	77.1122	61.2711	69.1875	48.6761
MitomiProbe_mut_1377	CGGGGTTAAGTTTGGGCCGTGGGTGGCTTGCAGCAG	62.2738	56.4482	51.6794	41.4904
MitomiProbe_mut_1378	CGGGGTTAAGTTTGGGCGGTGGGTGGCTTGCAGCAG	74.4606	65.5912	65.2332	42.5021
MitomiProbe_mut_1379	CGGGGTTAAGTTTGGGCTGTGGGTGGCTTGCAGCAG	51.6629	66.3968	58.8829	52.459
MitomiProbe_mut_138	AAAGCGGTAATTTGCTTTGTGGGTGCAGATATCTAT	82.6472	80.589	78.6429	61.4716
MitomiProbe_mut_1380	CGGGGTTAAGTTTGGGGAGTGGGTGGCTTGCAGCAG	86.9338	68.1728	58.4117	46.8392
MitomiProbe_mut_1381	CGGGGTTAAGTTTGGGGCGTGGGTGGCTTGCAGCAG	67.6734	72.4527	74.1905	53.9769
MitomiProbe_mut_1382	CGGGGTTAAGTTTGGGGGGTGGGTGGCTTGCAGCAG	139.501	122.699	102.964	82.965
MitomiProbe_mut_1383	CGGGGTTAAGTTTGGGGTGTGGGTGGCTTGCAGCAG	64.4488	70.008	53.7582	54.3823
MitomiProbe_mut_1384	CGGGGTTAAGTTTGGGTAGTGGGTGGCTTGCAGCAG	58.1156	68.0353	59.4185	44.6977
MitomiProbe_mut_1385	CGGGGTTAAGTTTGGGTCGTGGGTGGCTTGCAGCAG	79.904	84.2586	65.0875	52.1426
MitomiProbe_mut_1386	CGGGGTTAAGTTTGGGTGGTGGGTGGCTTGCAGCAG	59.0702	61.5651	48.1587	52.9987
MitomiProbe_mut_1387	CGGGGTTAAGTTTGGGTTGTGGGTGGCTTGCAGCAG	71.8896	66.4888	67.5541	48.0345
MitomiProbe_mut_1388	CGGGGTTAAGTTTGGTAAGTGGGTGGCTTGCAGCAG	70.663	61.9073	55.5072	40.7217
MitomiProbe_mut_1389	CGGGGTTAAGTTTGGTACGTGGGTGGCTTGCAGCAG	62.9809	61.9244	57.6676	34.7976
MitomiProbe_mut_139	AAAGCGGTAATTTGGAAAGTGGGTGCAGATATCTAT	85.9684	72.265	76.8995	63.5396
MitomiProbe_mut_1390	CGGGGTTAAGTTTGGTAGGTGGGTGGCTTGCAGCAG	69.5407	60.9628	79.7443	55.5749
MitomiProbe_mut_1391	CGGGGTTAAGTTTGGTATGTGGGTGGCTTGCAGCAG	77.2559	70.6475	66.2125	49.678
MitomiProbe_mut_1392	CGGGGTTAAGTTTGGTCAGTGGGTGGCTTGCAGCAG	82.1794	64.1364	60.0509	47.0814
MitomiProbe_mut_1393	CGGGGTTAAGTTTGGTCCGTGGGTGGCTTGCAGCAG	73.0863	66.4827	54.691	49.1298
MitomiProbe_mut_1394	CGGGGTTAAGTTTGGTCGGTGGGTGGCTTGCAGCAG	66.8133	63.6589	64.2401	56.7698
MitomiProbe_mut_1395	CGGGGTTAAGTTTGGTCTGTGGGTGGCTTGCAGCAG	63.1206	64.6157	66.8296	50.5308
MitomiProbe_mut_1396	CGGGGTTAAGTTTGGTGAGTGGGTGGCTTGCAGCAG	57.6924	63.4836	60.1784	44.8194
MitomiProbe_mut_1397	CGGGGTTAAGTTTGGTGCGTGGGTGGCTTGCAGCAG	73.3338	63.4015	62.549	47.8644
MitomiProbe_mut_1398	CGGGGTTAAGTTTGGTGGGTGGGTGGCTTGCAGCAG	72.3389	68.0915	58.7982	54.2335
MitomiProbe_mut_1399	CGGGGTTAAGTTTGGTGTGTGGGTGGCTTGCAGCAG	74.8471	74.1796	57.9275	45.6182
MitomiProbe_mut_14	AAAGCGGTAATTTGAACCGTGGGTGCAGATATCTAT	62.6366	82.9355	69.5829	65.5221
MitomiProbe_mut_140	AAAGCGGTAATTTGGAACGTGGGTGCAGATATCTAT	98.6272	113.309	78.2299	64.3553
MitomiProbe_mut_1400	CGGGGTTAAGTTTGGTTAGTGGGTGGCTTGCAGCAG	69.6764	74.2683	63.1852	57.2368
MitomiProbe_mut_1401	CGGGGTTAAGTTTGGTTCGTGGGTGGCTTGCAGCAG	63.942	65.4286	58.8529	53.4758
MitomiProbe_mut_1402	CGGGGTTAAGTTTGGTTGGTGGGTGGCTTGCAGCAG	95.1691	70.1038	59.4595	55.937
MitomiProbe_mut_1403	CGGGGTTAAGTTTGGTTTGTGGGTGGCTTGCAGCAG	80.3187	58.1812	63.4665	54.235
MitomiProbe_mut_1404	CGGGGTTAAGTTTGTAAAGTGGGTGGCTTGCAGCAG	66.0304	73.8204	76.0039	55.1807
MitomiProbe_mut_1405	CGGGGTTAAGTTTGTAACGTGGGTGGCTTGCAGCAG	74.1271	67.7453	54.12	45.6482
MitomiProbe_mut_1406	CGGGGTTAAGTTTGTAAGGTGGGTGGCTTGCAGCAG	66.8315	77.7055	62.0953	56.2153
MitomiProbe_mut_1407	CGGGGTTAAGTTTGTAATGTGGGTGGCTTGCAGCAG	74.869	54.1578	58.3945	53.8243
MitomiProbe_mut_1408	CGGGGTTAAGTTTGTACAGTGGGTGGCTTGCAGCAG	78.6031	72.6649	66.01	55.9605
MitomiProbe_mut_1409	CGGGGTTAAGTTTGTACCGTGGGTGGCTTGCAGCAG	66.1697	70.7107	61.5704	55.6611
MitomiProbe_mut_141	AAAGCGGTAATTTGGAAGGTGGGTGCAGATATCTAT	73.3865	55.687	57.6888	59.396
MitomiProbe_mut_1410	CGGGGTTAAGTTTGTACGGTGGGTGGCTTGCAGCAG	52.775	56.3102	63.1005	54.0732
MitomiProbe_mut_1411	CGGGGTTAAGTTTGTACTGTGGGTGGCTTGCAGCAG	82.5	78.7082	78.224	66.0563
MitomiProbe_mut_1412	CGGGGTTAAGTTTGTAGAGTGGGTGGCTTGCAGCAG	61.8035	65.6071	63.6837	47.8099
MitomiProbe_mut_1413	CGGGGTTAAGTTTGTAGCGTGGGTGGCTTGCAGCAG	76.1891	80.5811	73.4328	49.0526
MitomiProbe_mut_1414	CGGGGTTAAGTTTGTAGGGTGGGTGGCTTGCAGCAG	67.7667	55.7862	66.5578	42.7449
MitomiProbe_mut_1415	CGGGGTTAAGTTTGTAGTGTGGGTGGCTTGCAGCAG	73.4657	69.2983	66.3966	41.6524
MitomiProbe_mut_1416	CGGGGTTAAGTTTGTATAGTGGGTGGCTTGCAGCAG	67.8676	65.6804	60.9851	55.5
MitomiProbe_mut_1417	CGGGGTTAAGTTTGTATCGTGGGTGGCTTGCAGCAG	70.961	73.491	63.0249	56.6331
MitomiProbe_mut_1418	CGGGGTTAAGTTTGTATGGTGGGTGGCTTGCAGCAG	52.1334	64.2381	55.933	55.5642
MitomiProbe_mut_1419	CGGGGTTAAGTTTGTATTGTGGGTGGCTTGCAGCAG	73.5107	62.1138	66.2324	61.1724
MitomiProbe_mut_142	AAAGCGGTAATTTGGAATGTGGGTGCAGATATCTAT	85.0634	93.7533	88.2334	73.8015
MitomiProbe_mut_1420	CGGGGTTAAGTTTGTCAAGTGGGTGGCTTGCAGCAG	83.2121	62.4713	53.1401	59.8834
MitomiProbe_mut_1421	CGGGGTTAAGTTTGTCACAAAACTTGCTTGCAGCAG	78.9969	76.4283	67.5824	54.2424
MitomiProbe_mut_1422	CGGGGTTAAGTTTGTCACAACACTTGCTTGCAGCAG	87.3783	87.7981	72.129	68.393
MitomiProbe_mut_1423	CGGGGTTAAGTTTGTCACAAGACTTGCTTGCAGCAG	106.799	113.124	111.601	104.967
MitomiProbe_mut_1424	CGGGGTTAAGTTTGTCACAATACTTGCTTGCAGCAG	81.0241	77.9373	84.1838	61.442
MitomiProbe_mut_1425	CGGGGTTAAGTTTGTCACACAACTTGCTTGCAGCAG	72.2317	93.068	73.646	59.3072
MitomiProbe_mut_1426	CGGGGTTAAGTTTGTCACACCACTTGCTTGCAGCAG	104.741	91.8508	92.5867	65.4538
MitomiProbe_mut_1427	CGGGGTTAAGTTTGTCACACGACTTGCTTGCAGCAG	116.842	119.377	82.798	68.5
MitomiProbe_mut_1428	CGGGGTTAAGTTTGTCACACTACTTGCTTGCAGCAG	78.7701	91.9833	73.1925	64.0441
MitomiProbe_mut_1429	CGGGGTTAAGTTTGTCACAGAACTTGCTTGCAGCAG	87.7822	61.8644	66.126	60.4196
MitomiProbe_mut_143	AAAGCGGTAATTTGGACAGTGGGTGCAGATATCTAT	74.7839	64.7987	74.9927	64.7641
MitomiProbe_mut_1430	CGGGGTTAAGTTTGTCACAGCACTTGCTTGCAGCAG	58.6848	71.0751	58.1551	51.1828
MitomiProbe_mut_1431	CGGGGTTAAGTTTGTCACAGGACTTGCTTGCAGCAG	101.414	80.8994	83.3565	78.5655
MitomiProbe_mut_1432	CGGGGTTAAGTTTGTCACAGTACTTGCTTGCAGCAG	81.1069	63.1339	55.505	53.803
MitomiProbe_mut_1433	CGGGGTTAAGTTTGTCACATAACTTGCTTGCAGCAG	63.7261	53.108	68.5327	54.2852
MitomiProbe_mut_1434	CGGGGTTAAGTTTGTCACATCACTTGCTTGCAGCAG	69.5139	67.7596	66.1699	63.0705
MitomiProbe_mut_1435	CGGGGTTAAGTTTGTCACATGACTTGCTTGCAGCAG	1871.28	2676.35	1358.57	2124.33
MitomiProbe_mut_1436	CGGGGTTAAGTTTGTCACATTACTTGCTTGCAGCAG	112.389	91.2058	88.5891	91.8528
MitomiProbe_mut_1437	CGGGGTTAAGTTTGTCACCAAACTTGCTTGCAGCAG	72.5833	64.6528	57.6377	69.9911
MitomiProbe_mut_1438	CGGGGTTAAGTTTGTCACCACACTTGCTTGCAGCAG	81.9814	73.9001	67.6923	50.7905
MitomiProbe_mut_1439	CGGGGTTAAGTTTGTCACCAGACTTGCTTGCAGCAG	65.4983	64.05	63.8846	61.1612
MitomiProbe_mut_144	AAAGCGGTAATTTGGACCGTGGGTGCAGATATCTAT	64.527	66.1421	68.4198	55.9784
MitomiProbe_mut_1440	CGGGGTTAAGTTTGTCACCATACTTGCTTGCAGCAG	72.5685	72.5863	65.0006	60.5161
MitomiProbe_mut_1441	CGGGGTTAAGTTTGTCACCCAACTTGCTTGCAGCAG	69.9168	52.7521	62.6316	54.5883
MitomiProbe_mut_1442	CGGGGTTAAGTTTGTCACCCCACTTGCTTGCAGCAG	68.2113	67.0626	78.5422	57.1506
MitomiProbe_mut_1443	CGGGGTTAAGTTTGTCACCCGACTTGCTTGCAGCAG	65.4246	62.8307	62.2885	52.1975
MitomiProbe_mut_1444	CGGGGTTAAGTTTGTCACCCTACTTGCTTGCAGCAG	75.0859	70.9983	69.5643	48.6805
MitomiProbe_mut_1445	CGGGGTTAAGTTTGTCACCGAACTTGCTTGCAGCAG	60.1464	64.0149	61.3874	46.0398
MitomiProbe_mut_1446	CGGGGTTAAGTTTGTCACCGCACTTGCTTGCAGCAG	68.0983	54.9565	49.6373	44.6222
MitomiProbe_mut_1447	CGGGGTTAAGTTTGTCACCGGACTTGCTTGCAGCAG	92.1556	67.9677	65.4979	81.5124
MitomiProbe_mut_1448	CGGGGTTAAGTTTGTCACCGTACTTGCTTGCAGCAG	63.8587	53.0796	55.689	54.6517
MitomiProbe_mut_1449	CGGGGTTAAGTTTGTCACCTAACTTGCTTGCAGCAG	65.7894	57.3476	61.9038	52.7132
MitomiProbe_mut_145	AAAGCGGTAATTTGGACGGTGGGTGCAGATATCTAT	72.9915	70.2345	73.39	53.226
MitomiProbe_mut_1450	CGGGGTTAAGTTTGTCACCTCACTTGCTTGCAGCAG	68.3298	59.7773	52.7875	46.3683
MitomiProbe_mut_1451	CGGGGTTAAGTTTGTCACCTGACTTGCTTGCAGCAG	1934.37	1674.97	1735.93	2066.76
MitomiProbe_mut_1452	CGGGGTTAAGTTTGTCACCTTACTTGCTTGCAGCAG	67.4585	66.5279	52.6736	62.9257
MitomiProbe_mut_1453	CGGGGTTAAGTTTGTCACGAAACTTGCTTGCAGCAG	66.3182	79.6024	75.3074	59.3852
MitomiProbe_mut_1454	CGGGGTTAAGTTTGTCACGACACTTGCTTGCAGCAG	197.316	146.34	165.242	101.023
MitomiProbe_mut_1455	CGGGGTTAAGTTTGTCACGAGACTTGCTTGCAGCAG	970.38	639.239	853.958	360.278
MitomiProbe_mut_1456	CGGGGTTAAGTTTGTCACGATACTTGCTTGCAGCAG	169.279	195.445	170.333	115.579
MitomiProbe_mut_1457	CGGGGTTAAGTTTGTCACGCAACTTGCTTGCAGCAG	110.605	97.0108	104.185	63.6201
MitomiProbe_mut_1458	CGGGGTTAAGTTTGTCACGCCACTTGCTTGCAGCAG	191.798	204.105	163.733	153.64
MitomiProbe_mut_1459	CGGGGTTAAGTTTGTCACGCGACTTGCTTGCAGCAG	518.914	545.475	333.878	236.927
MitomiProbe_mut_146	AAAGCGGTAATTTGGACTGTGGGTGCAGATATCTAT	71.1634	81.5833	63.7396	58.938
MitomiProbe_mut_1460	CGGGGTTAAGTTTGTCACGCTACTTGCTTGCAGCAG	165.876	178.706	177.317	109.482
MitomiProbe_mut_1461	CGGGGTTAAGTTTGTCACGGAACTTGCTTGCAGCAG	67.839	64.0175	64.8487	59.3874
MitomiProbe_mut_1462	CGGGGTTAAGTTTGTCACGGCACTTGCTTGCAGCAG	90.7811	77.0056	77.6071	48.8096
MitomiProbe_mut_1463	CGGGGTTAAGTTTGTCACGGGACTTGCTTGCAGCAG	1329.36	788.458	1093.25	446.983
MitomiProbe_mut_1464	CGGGGTTAAGTTTGTCACGGTACTTGCTTGCAGCAG	192.256	150.601	158.86	120.659
MitomiProbe_mut_1465	CGGGGTTAAGTTTGTCACGTAACTTGCTTGCAGCAG	92.6162	108.36	88.1331	75.6829
MitomiProbe_mut_1466	CGGGGTTAAGTTTGTCACGTCACTTGCTTGCAGCAG	104.141	110.105	97.6015	74.3045
MitomiProbe_mut_1467	CGGGGTTAAGTTTGTCACGTGACTTGCTTGCAGCAG	30350.8	31622.9	37949.2	33104.6
MitomiProbe_mut_1468	CGGGGTTAAGTTTGTCACGTGGGTGGCTTGCAGCAG	3121.82	2753.92	528.474	222.272
MitomiProbe_mut_1469	CGGGGTTAAGTTTGTCACGTGTTTTGCTTGCAGCAG	5844.88	4747.24	1775.33	615.294
MitomiProbe_mut_147	AAAGCGGTAATTTGGAGAGTGGGTGCAGATATCTAT	76.0584	81.3192	65.6326	62.1685
MitomiProbe_mut_1470	CGGGGTTAAGTTTGTCACGTTACTTGCTTGCAGCAG	630.283	757.49	569.501	335.118
MitomiProbe_mut_1471	CGGGGTTAAGTTTGTCACTAAACTTGCTTGCAGCAG	80.9792	60.2604	66.139	64.1789
MitomiProbe_mut_1472	CGGGGTTAAGTTTGTCACTACACTTGCTTGCAGCAG	74.7783	67.5203	76.265	62.922
MitomiProbe_mut_1473	CGGGGTTAAGTTTGTCACTAGACTTGCTTGCAGCAG	76.7089	63.4438	58.2786	54.5356
MitomiProbe_mut_1474	CGGGGTTAAGTTTGTCACTATACTTGCTTGCAGCAG	77.7598	72.9058	74.4851	62.1269
MitomiProbe_mut_1475	CGGGGTTAAGTTTGTCACTCAACTTGCTTGCAGCAG	66.747	57.1553	56.5243	66.1086
MitomiProbe_mut_1476	CGGGGTTAAGTTTGTCACTCCACTTGCTTGCAGCAG	92.625	60.6048	58.9136	56.8725
MitomiProbe_mut_1477	CGGGGTTAAGTTTGTCACTCGACTTGCTTGCAGCAG	53.2813	58.9502	60.8078	54.4754
MitomiProbe_mut_1478	CGGGGTTAAGTTTGTCACTCTACTTGCTTGCAGCAG	56.2014	61.6366	57.3374	52.461
MitomiProbe_mut_1479	CGGGGTTAAGTTTGTCACTGAACTTGCTTGCAGCAG	87.1259	70.4711	67.1584	56.8672
MitomiProbe_mut_148	AAAGCGGTAATTTGGAGCGTGGGTGCAGATATCTAT	69.5455	72.5088	79.846	56.3923
MitomiProbe_mut_1480	CGGGGTTAAGTTTGTCACTGCACTTGCTTGCAGCAG	66.255	64.2487	59.2838	47.7868
MitomiProbe_mut_1481	CGGGGTTAAGTTTGTCACTGGACTTGCTTGCAGCAG	69.6418	70.7243	79.371	63.0965
MitomiProbe_mut_1482	CGGGGTTAAGTTTGTCACTGTACTTGCTTGCAGCAG	60.3819	62.8114	66.6371	60.8155
MitomiProbe_mut_1483	CGGGGTTAAGTTTGTCACTTAACTTGCTTGCAGCAG	77.1118	57.8888	69.5988	61.0797
MitomiProbe_mut_1484	CGGGGTTAAGTTTGTCACTTCACTTGCTTGCAGCAG	76.0562	73.0737	62.8509	54.057
MitomiProbe_mut_1485	CGGGGTTAAGTTTGTCACTTGACTTGCTTGCAGCAG	123.142	141.278	122.141	131.738
MitomiProbe_mut_1486	CGGGGTTAAGTTTGTCACTTTACTTGCTTGCAGCAG	60.063	65.9438	63.9066	58.5043
MitomiProbe_mut_1487	CGGGGTTAAGTTTGTCAGGTGGGTGGCTTGCAGCAG	122.849	127.484	110.572	87.7298
MitomiProbe_mut_1488	CGGGGTTAAGTTTGTCATGTGGGTGGCTTGCAGCAG	151.258	158.929	95.4968	79.3076
MitomiProbe_mut_1489	CGGGGTTAAGTTTGTCCAGTGGGTGGCTTGCAGCAG	74.0576	63.1349	63.1444	55.4155
MitomiProbe_mut_149	AAAGCGGTAATTTGGAGGGTGGGTGCAGATATCTAT	79.3995	68.4598	69.9439	63.4107
MitomiProbe_mut_1490	CGGGGTTAAGTTTGTCCCGTGGGTGGCTTGCAGCAG	89.4998	79.9995	67.7706	47.8136
MitomiProbe_mut_1491	CGGGGTTAAGTTTGTCCGGTGGGTGGCTTGCAGCAG	73.1907	59.3112	62.1919	43.5635
MitomiProbe_mut_1492	CGGGGTTAAGTTTGTCCTGTGGGTGGCTTGCAGCAG	66.6229	59.9996	63.8429	51.1736
MitomiProbe_mut_1493	CGGGGTTAAGTTTGTCGAGTGGGTGGCTTGCAGCAG	72.5163	51.0853	61.0568	52.0268
MitomiProbe_mut_1494	CGGGGTTAAGTTTGTCGCGTGGGTGGCTTGCAGCAG	104.873	72.1578	58.4369	58.4727
MitomiProbe_mut_1495	CGGGGTTAAGTTTGTCGGGTGGGTGGCTTGCAGCAG	61.4226	65.6975	62.1792	49.7541
MitomiProbe_mut_1496	CGGGGTTAAGTTTGTCGTGTGGGTGGCTTGCAGCAG	76.9922	72.7404	62.7247	52.9085
MitomiProbe_mut_1497	CGGGGTTAAGTTTGTCTAGTGGGTGGCTTGCAGCAG	81.9	70.3712	73.338	53.1663
MitomiProbe_mut_1498	CGGGGTTAAGTTTGTCTCGTGGGTGGCTTGCAGCAG	94.7353	75.1804	74.6763	58.7768
MitomiProbe_mut_1499	CGGGGTTAAGTTTGTCTGGTGGGTGGCTTGCAGCAG	77.3822	76.7848	70.3608	53.8397
MitomiProbe_mut_15	AAAGCGGTAATTTGAACGGTGGGTGCAGATATCTAT	82.2636	78.1129	66.7613	62.6288
MitomiProbe_mut_150	AAAGCGGTAATTTGGAGTGTGGGTGCAGATATCTAT	67.0457	80.1452	66.8629	55.1617
MitomiProbe_mut_1500	CGGGGTTAAGTTTGTCTTGTGGGTGGCTTGCAGCAG	82.0596	75.4841	62.2687	52.3383
MitomiProbe_mut_1501	CGGGGTTAAGTTTGTGAAGTGGGTGGCTTGCAGCAG	80.1298	75.2987	57.4	57.843
MitomiProbe_mut_1502	CGGGGTTAAGTTTGTGACGTGGGTGGCTTGCAGCAG	93.6057	84.9127	56.3848	40.8405
MitomiProbe_mut_1503	CGGGGTTAAGTTTGTGAGGTGGGTGGCTTGCAGCAG	65.2351	78.6639	66.6193	53.6953
MitomiProbe_mut_1504	CGGGGTTAAGTTTGTGATGTGGGTGGCTTGCAGCAG	84.593	62.5071	65.8462	47.9758
MitomiProbe_mut_1505	CGGGGTTAAGTTTGTGCAGTGGGTGGCTTGCAGCAG	59.3125	58.6434	69.1778	62.6925
MitomiProbe_mut_1506	CGGGGTTAAGTTTGTGCCGTGGGTGGCTTGCAGCAG	54.3295	52.2697	51.3925	46.7717
MitomiProbe_mut_1507	CGGGGTTAAGTTTGTGCGGTGGGTGGCTTGCAGCAG	73.4764	72.9277	60.128	57.2587
MitomiProbe_mut_1508	CGGGGTTAAGTTTGTGCTGTGGGTGGCTTGCAGCAG	56.6907	80.0497	64.1701	43.4231
MitomiProbe_mut_1509	CGGGGTTAAGTTTGTGGAGTGGGTGGCTTGCAGCAG	61.9181	71.568	55.9072	57.7668
MitomiProbe_mut_151	AAAGCGGTAATTTGGATAGTGGGTGCAGATATCTAT	77.4	75.788	63.6678	68.8561
MitomiProbe_mut_1510	CGGGGTTAAGTTTGTGGCGTGGGTGGCTTGCAGCAG	56.2757	88.301	68.2665	50.0312
MitomiProbe_mut_1511	CGGGGTTAAGTTTGTGGGGTGGGTGGCTTGCAGCAG	65.9167	74.4442	71.5289	65.4297
MitomiProbe_mut_1512	CGGGGTTAAGTTTGTGGTGTGGGTGGCTTGCAGCAG	68.8131	64.2331	63.4038	63.4458
MitomiProbe_mut_1513	CGGGGTTAAGTTTGTGTAGTGGGTGGCTTGCAGCAG	64.5895	69.1321	58.4868	52.9966
MitomiProbe_mut_1514	CGGGGTTAAGTTTGTGTCGTGGGTGGCTTGCAGCAG	83.2283	71.1511	69.669	49.8419
MitomiProbe_mut_1515	CGGGGTTAAGTTTGTGTGGTGGGTGGCTTGCAGCAG	70.525	62.4243	52.7984	55.9194
MitomiProbe_mut_1516	CGGGGTTAAGTTTGTGTTGTGGGTGGCTTGCAGCAG	64.2987	69.6107	70.1437	40.3753
MitomiProbe_mut_1517	CGGGGTTAAGTTTGTTAAGTGGGTGGCTTGCAGCAG	73.5062	58.4986	58.7667	51.6489
MitomiProbe_mut_1518	CGGGGTTAAGTTTGTTACGTGGGTGGCTTGCAGCAG	67.4554	60.4355	58.4228	50.105
MitomiProbe_mut_1519	CGGGGTTAAGTTTGTTAGGTGGGTGGCTTGCAGCAG	84.8688	76.3708	57.7431	55.0357
MitomiProbe_mut_152	AAAGCGGTAATTTGGATCGTGGGTGCAGATATCTAT	71.5066	78.5595	63.196	52.5692
MitomiProbe_mut_1520	CGGGGTTAAGTTTGTTATGTGGGTGGCTTGCAGCAG	74.412	59.4763	62.5186	72.9108
MitomiProbe_mut_1521	CGGGGTTAAGTTTGTTCAGTGGGTGGCTTGCAGCAG	63.3973	72.0866	65.7926	55.5961
MitomiProbe_mut_1522	CGGGGTTAAGTTTGTTCCGTGGGTGGCTTGCAGCAG	59.4312	54.602	53.3585	49.5569
MitomiProbe_mut_1523	CGGGGTTAAGTTTGTTCGGTGGGTGGCTTGCAGCAG	66.4337	76.5648	70.926	62.8314
MitomiProbe_mut_1524	CGGGGTTAAGTTTGTTCTGTGGGTGGCTTGCAGCAG	65.6058	59.6608	63.3443	55.7201
MitomiProbe_mut_1525	CGGGGTTAAGTTTGTTGAGTGGGTGGCTTGCAGCAG	91.4596	92.4806	74.6306	56.687
MitomiProbe_mut_1526	CGGGGTTAAGTTTGTTGCGTGGGTGGCTTGCAGCAG	87.7994	66.9165	66.6396	43.5408
MitomiProbe_mut_1527	CGGGGTTAAGTTTGTTGGGTGGGTGGCTTGCAGCAG	76.3015	68.6653	64.0056	50.634
MitomiProbe_mut_1528	CGGGGTTAAGTTTGTTGTGTGGGTGGCTTGCAGCAG	72.1334	63.6557	56.136	49.2083
MitomiProbe_mut_1529	CGGGGTTAAGTTTGTTTAGTGGGTGGCTTGCAGCAG	60.094	55.7174	50.2033	51.2071
MitomiProbe_mut_153	AAAGCGGTAATTTGGATGGTGGGTGCAGATATCTAT	72.7955	66.6333	69.7976	57.5555
MitomiProbe_mut_1530	CGGGGTTAAGTTTGTTTCGTGGGTGGCTTGCAGCAG	75.1899	72.2432	61.2323	68.8273
MitomiProbe_mut_1531	CGGGGTTAAGTTTGTTTGGTGGGTGGCTTGCAGCAG	80.6433	80.5142	63.395	61.0565
MitomiProbe_mut_1532	CGGGGTTAAGTTTGTTTTGTGGGTGGCTTGCAGCAG	93.4261	81.7924	73.762	60.0093
MitomiProbe_mut_1533	CGGGGTTAAGTTTTACACGTGTTTTGCTTGCAGCAG	1031.98	476.633	238.638	95.723
MitomiProbe_mut_1534	CGGGGTTAAGTTTTCCACGTGTTTTGCTTGCAGCAG	598.028	337.597	156.233	109.798
MitomiProbe_mut_1535	CGGGGTTAAGTTTTGCACGTGTTTTGCTTGCAGCAG	1388.18	776.541	263.155	111
MitomiProbe_mut_1536	CGGGGTTAAGTTTTTCACGTGAAATGCTTGCAGCAG	671.602	743.276	427.441	295.269
MitomiProbe_mut_1537	CGGGGTTAAGTTTTTCACGTGAACTGCTTGCAGCAG	805.534	696.112	601.86	348.608
MitomiProbe_mut_1538	CGGGGTTAAGTTTTTCACGTGAAGTGCTTGCAGCAG	658.317	487.565	412.467	161.328
MitomiProbe_mut_1539	CGGGGTTAAGTTTTTCACGTGAATTGCTTGCAGCAG	628.163	517.577	433.144	356.777
MitomiProbe_mut_154	AAAGCGGTAATTTGGATTGTGGGTGCAGATATCTAT	83.3182	82.0469	78.0814	58.1313
MitomiProbe_mut_1540	CGGGGTTAAGTTTTTCACGTGACATGCTTGCAGCAG	5794.81	6615.97	4866.58	3759.34
MitomiProbe_mut_1541	CGGGGTTAAGTTTTTCACGTGACCTGCTTGCAGCAG	9995.45	5795.02	9242.29	6002.93
MitomiProbe_mut_1542	CGGGGTTAAGTTTTTCACGTGACGTGCGATCAGCAG	5572.95	5785.35	5068.33	4048.52
MitomiProbe_mut_1543	CGGGGTTAAGTTTTTCACGTGACTTGCTTGCAGCAG	7028.05	8472.27	7280.87	6239.22
MitomiProbe_mut_1544	CGGGGTTAAGTTTTTCACGTGAGATGCTTGCAGCAG	907.815	722.228	550.284	281.227
MitomiProbe_mut_1545	CGGGGTTAAGTTTTTCACGTGAGCTGCTTGCAGCAG	1014.21	1132.33	689.364	342.555
MitomiProbe_mut_1546	CGGGGTTAAGTTTTTCACGTGAGGTGCTTGCAGCAG	783.531	695.74	323.514	181.591
MitomiProbe_mut_1547	CGGGGTTAAGTTTTTCACGTGAGTTGCTTGCAGCAG	923.037	827.131	492.723	235.737
MitomiProbe_mut_1548	CGGGGTTAAGTTTTTCACGTGATATGCTTGCAGCAG	4514.15	3892.19	3438.42	2034.76
MitomiProbe_mut_1549	CGGGGTTAAGTTTTTCACGTGATCTGCTTGCAGCAG	5339.72	8724	4090.18	4796.14
MitomiProbe_mut_155	AAAGCGGTAATTTGGCAAGTGGGTGCAGATATCTAT	87.2902	86.6363	71.4063	72.0218
MitomiProbe_mut_1550	CGGGGTTAAGTTTTTCACGTGATGTGCTTGCAGCAG	3225.31	3371.61	2805.29	2165.52
MitomiProbe_mut_1551	CGGGGTTAAGTTTTTCACGTGATTTGCTTGCAGCAG	4003.89	3955.63	3158.66	2722.62
MitomiProbe_mut_1552	CGGGGTTAAGTTTTTCACGTGCAATGCTTGCAGCAG	985.692	522.646	297.472	121.488
MitomiProbe_mut_1553	CGGGGTTAAGTTTTTCACGTGCACTGCTTGCAGCAG	837.416	603.639	306.355	133.095
MitomiProbe_mut_1554	CGGGGTTAAGTTTTTCACGTGCAGTGCTTGCAGCAG	562.923	565.593	312.935	135.228
MitomiProbe_mut_1555	CGGGGTTAAGTTTTTCACGTGCATTGCTTGCAGCAG	843.092	560.247	292.058	133.152
MitomiProbe_mut_1556	CGGGGTTAAGTTTTTCACGTGCCATGCTTGCAGCAG	1010.98	622.97	326.9	131.506
MitomiProbe_mut_1557	CGGGGTTAAGTTTTTCACGTGCCCTGCTTGCAGCAG	1132.26	710.123	310.513	122.437
MitomiProbe_mut_1558	CGGGGTTAAGTTTTTCACGTGCCGTGCTTTCAGCAG	833.416	539.321	295.799	136.512
MitomiProbe_mut_1559	CGGGGTTAAGTTTTTCACGTGCCTTGCTTGCAGCAG	900.195	608.465	221.896	123.679
MitomiProbe_mut_156	AAAGCGGTAATTTGGCACGTGGGTGCAGATATCTAT	1352.59	659.227	173.313	91.3824
MitomiProbe_mut_1560	CGGGGTTAAGTTTTTCACGTGCGATGCTTGCAGCAG	719.594	483.845	216.235	88.1223
MitomiProbe_mut_1561	CGGGGTTAAGTTTTTCACGTGCGCTGCTTGCAGCAG	652.137	428.941	193.072	100.804
MitomiProbe_mut_1562	CGGGGTTAAGTTTTTCACGTGCGGTGCTTGCAGCAG	394.356	387.631	156.185	103.773
MitomiProbe_mut_1563	CGGGGTTAAGTTTTTCACGTGCGTTGCTTGCAGCAG	494.347	426.022	178.632	97.6638
MitomiProbe_mut_1564	CGGGGTTAAGTTTTTCACGTGCTATGCTTGCAGCAG	1058.3	476.621	294.563	143.189
MitomiProbe_mut_1565	CGGGGTTAAGTTTTTCACGTGCTCTGCTTGCAGCAG	1132.11	821.971	394.144	148.15
MitomiProbe_mut_1566	CGGGGTTAAGTTTTTCACGTGCTGTGCTTGCAGCAG	894.939	632.933	286.038	115.14
MitomiProbe_mut_1567	CGGGGTTAAGTTTTTCACGTGCTTTGCTTGCAGCAG	1159.87	687.453	339.022	140.921
MitomiProbe_mut_1568	CGGGGTTAAGTTTTTCACGTGGAATGCTTGCAGCAG	401.819	295.257	207.536	84.0517
MitomiProbe_mut_1569	CGGGGTTAAGTTTTTCACGTGGACTGCTTGCAGCAG	588.88	472.125	212.772	102.213
MitomiProbe_mut_157	AAAGCGGTAATTTGGCACGTGTTTTCACATATCTAT	3480.11	1741.05	567.293	125.326
MitomiProbe_mut_1570	CGGGGTTAAGTTTTTCACGTGGAGTGCTTGCAGCAG	374.181	282.031	155.905	89.3456
MitomiProbe_mut_1571	CGGGGTTAAGTTTTTCACGTGGATTGCTTGCAGCAG	462.876	342.754	186.044	93.9343
MitomiProbe_mut_1572	CGGGGTTAAGTTTTTCACGTGGCATGCTTGCAGCAG	611.776	375.02	171.563	86.1265
MitomiProbe_mut_1573	CGGGGTTAAGTTTTTCACGTGGCCTGCTTGCAGCAG	670.359	365.033	200.296	99.498
MitomiProbe_mut_1574	CGGGGTTAAGTTTTTCACGTGGCGTGCCGTCGGCAG	487.343	307.402	154.145	81.4672
MitomiProbe_mut_1575	CGGGGTTAAGTTTTTCACGTGGCTTGCTTGCAGCAG	708.778	481.762	253.802	107.857
MitomiProbe_mut_1576	CGGGGTTAAGTTTTTCACGTGGGATGCTTGCAGCAG	390.312	297.399	141.451	80.2115
MitomiProbe_mut_1577	CGGGGTTAAGTTTTTCACGTGGGCTGCTTGCAGCAG	547.81	326.06	184.603	92.96
MitomiProbe_mut_1578	CGGGGTTAAGTTTTTCACGTGGGGTGCTTGCAGCAG	527.55	344.629	172.323	93.5803
MitomiProbe_mut_1579	CGGGGTTAAGTTTTTCACGTGGGTTGCTTGCAGCAG	565.022	319.378	188.396	114.548
MitomiProbe_mut_158	AAAGCGGTAATTTGGCAGGTGGGTGCAGATATCTAT	90.7184	91.6176	83.7324	65.1481
MitomiProbe_mut_1580	CGGGGTTAAGTTTTTCACGTGGTATGCTTGCAGCAG	880.718	545.766	281.104	125.771
MitomiProbe_mut_1581	CGGGGTTAAGTTTTTCACGTGGTCTGCTTGCAGCAG	1051.42	712.092	389.589	157.528
MitomiProbe_mut_1582	CGGGGTTAAGTTTTTCACGTGGTGTGCTTGCAGCAG	741.925	472.743	267.693	107.069
MitomiProbe_mut_1583	CGGGGTTAAGTTTTTCACGTGGTTTGCTTGCAGCAG	970.176	737.882	432.275	168.751
MitomiProbe_mut_1584	CGGGGTTAAGTTTTTCACGTGTAATGCTTGCAGCAG	603.338	318.464	317.188	115.963
MitomiProbe_mut_1585	CGGGGTTAAGTTTTTCACGTGTACTGCTTGCAGCAG	620.289	544.115	259.012	145.525
MitomiProbe_mut_1586	CGGGGTTAAGTTTTTCACGTGTAGTGCTTGCAGCAG	465.568	385.069	227.259	127.681
MitomiProbe_mut_1587	CGGGGTTAAGTTTTTCACGTGTATTGCTTGCAGCAG	701.76	454.53	308.391	131.453
MitomiProbe_mut_1588	CGGGGTTAAGTTTTTCACGTGTCATGCTCGCAGCAG	737.164	652.203	272.289	161.273
MitomiProbe_mut_1589	CGGGGTTAAGTTTTTCACGTGTCCTGCTTGCAGCAG	885.033	597.319	339.681	132.709
MitomiProbe_mut_159	AAAGCGGTAATTTGGCATGTGGGTGCAGATATCTAT	109.993	92.9192	86.0498	75.1737
MitomiProbe_mut_1590	CGGGGTTAAGTTTTTCACGTGTCGTGCGATCAGCAG	708.678	578.069	235.604	117.357
MitomiProbe_mut_1591	CGGGGTTAAGTTTTTCACGTGTCTTGCTTGCAGCAG	658.903	648.566	244.835	120.011
MitomiProbe_mut_1592	CGGGGTTAAGTTTTTCACGTGTGATGCTTGCAGCAG	482.246	338.785	204.371	110.546
MitomiProbe_mut_1593	CGGGGTTAAGTTTTTCACGTGTGCTGCTTGCAGCAG	516.83	436.184	268.34	114.478
MitomiProbe_mut_1594	CGGGGTTAAGTTTTTCACGTGTGGTGCTTGCAGCAG	424.948	326.194	206.876	104.035
MitomiProbe_mut_1595	CGGGGTTAAGTTTTTCACGTGTGTTGCTTGCAGCAG	593.524	394.955	192.346	113.438
MitomiProbe_mut_1596	CGGGGTTAAGTTTTTCACGTGTTATGCTTGCAGCAG	1145.1	568.874	323.795	147.783
MitomiProbe_mut_1597	CGGGGTTAAGTTTTTCACGTGTTCTGCTTGCAGCAG	815.689	821.175	358.463	158.308
MitomiProbe_mut_1598	CGGGGTTAAGTTTTTCACGTGTTGTGCTTGCAGCAG	840.516	601.451	375.681	143.571
MitomiProbe_mut_1599	CGGGGTTAAGTTTTTCACGTGTTTTGCTTGCAGCAG	757.385	494.308	314.072	150.924
MitomiProbe_mut_16	AAAGCGGTAATTTGAACTGTGGGTGCAGATATCTAT	71.9337	67.93	68.1314	69.9778
MitomiProbe_mut_160	AAAGCGGTAATTTGGCCAGTGGGTGCAGATATCTAT	60.6071	76.7131	63.5125	55.5331
MitomiProbe_mut_1600	CGGGGTTAAGTTTTTCACGTGTTTTGCTTGCAGCAG	850.261	621.691	347.515	146.039
MitomiProbe_mut_1601	CGTCCTAGAGATTACCACGTGTTTTCCATGAGGAAG	1453.21	903.599	263.986	109.353
MitomiProbe_mut_1602	CGTCCTAGAGATTAGCACGTGTTTTCCATGAGGAAG	2355.42	1207.61	319.617	95.0508
MitomiProbe_mut_1603	CGTCCTAGCGATTAACACGTGTTTTCCATGAGGAAG	2496.11	1206.25	414.51	154.199
MitomiProbe_mut_1604	CGTCCTAGCGATTATCACGTGTTTTCCATGAGGAAG	4631.26	2923.11	1538.8	393.892
MitomiProbe_mut_1605	CGTCCTAGCGATTCGCACGTGTTTTCCATGAGGAAG	1088.13	726.512	177.999	81.9136
MitomiProbe_mut_1606	CGTCCTAGCGATTGAAAAGTGGGTGCCATGAGGAAG	73.2241	70.6387	78.0051	57.6719
MitomiProbe_mut_1607	CGTCCTAGCGATTGAAACGTGGGTGCCATGAGGAAG	124.764	94.1075	92.8137	58.8526
MitomiProbe_mut_1608	CGTCCTAGCGATTGAAAGGTGGGTGCCATGAGGAAG	59.639	62.0781	52.5266	47.7395
MitomiProbe_mut_1609	CGTCCTAGCGATTGAAATGTGGGTGCCATGAGGAAG	72.8798	70.0253	65.7267	61.3247
MitomiProbe_mut_161	AAAGCGGTAATTTGGCCCGTGGGTGCAGATATCTAT	73.1733	102.675	57.4479	61.5475
MitomiProbe_mut_1610	CGTCCTAGCGATTGAACAGTGGGTGCCATGAGGAAG	84.5456	61.5371	66.5145	50.5127
MitomiProbe_mut_1611	CGTCCTAGCGATTGAACCGTGGGTGCCATGAGGAAG	55.3285	69.175	57.61	46.3648
MitomiProbe_mut_1612	CGTCCTAGCGATTGAACGGTGGGTGCCATGAGGAAG	69.603	77.4269	65.5222	49.3398
MitomiProbe_mut_1613	CGTCCTAGCGATTGAACTGTGGGTGCCATGAGGAAG	70.8589	77.2281	71.9266	51.9903
MitomiProbe_mut_1614	CGTCCTAGCGATTGAAGAGTGGGTGCCATGAGGAAG	68.4048	67.0254	63.2525	52.9842
MitomiProbe_mut_1615	CGTCCTAGCGATTGAAGCGTGGGTGCCATGAGGAAG	82.7273	71.2394	62.5072	50.7385
MitomiProbe_mut_1616	CGTCCTAGCGATTGAAGGGTGGGTGCCATGAGGAAG	62.6066	68.5345	63.4056	51.5977
MitomiProbe_mut_1617	CGTCCTAGCGATTGAAGTGTGGGTGCCATGAGGAAG	74.8309	88.2129	66.1125	51.8207
MitomiProbe_mut_1618	CGTCCTAGCGATTGAATAGTGGGTGCCATGAGGAAG	77.8257	67.6868	67.6725	54.2785
MitomiProbe_mut_1619	CGTCCTAGCGATTGAATCGTGGGTGCCATGAGGAAG	73.338	68.4335	66.5264	52.9516
MitomiProbe_mut_162	AAAGCGGTAATTTGGCCGGTGGGTGCAGATATCTAT	72.1184	85.0326	70.5384	70.9746
MitomiProbe_mut_1620	CGTCCTAGCGATTGAATGGTGGGTGCCATGAGGAAG	67.9937	66.1315	52.1882	47.2045
MitomiProbe_mut_1621	CGTCCTAGCGATTGAATTGTGGGTGCCATGAGGAAG	86.6832	77.9072	80.9238	61.6716
MitomiProbe_mut_1622	CGTCCTAGCGATTGACAAGTGGGTGCCATGAGGAAG	74.6607	73.6707	78.5352	54.2091
MitomiProbe_mut_1623	CGTCCTAGCGATTGACACGTGGGTGCCATGAGGAAG	870.648	381.34	142.687	72.5087
MitomiProbe_mut_1624	CGTCCTAGCGATTGACACGTGTTTTCCATGAGGAAG	1616.51	904.786	285.108	101.159
MitomiProbe_mut_1625	CGTCCTAGCGATTGACAGGTGGGTGCCATGAGGAAG	58.1807	62.6234	68.4686	51.5794
MitomiProbe_mut_1626	CGTCCTAGCGATTGACATGTGGGTGCCATGAGGAAG	100.096	82.876	77.9753	59.9188
MitomiProbe_mut_1627	CGTCCTAGCGATTGACCAGTGGGTGCCATGAGGAAG	68.9009	72.4617	67.9144	46.7955
MitomiProbe_mut_1628	CGTCCTAGCGATTGACCCGTGGGTGCCATGAGGAAG	93.7878	89.3447	59.5022	48.1636
MitomiProbe_mut_1629	CGTCCTAGCGATTGACCGGTGGGTGCCATGAGGAAG	67.2616	56.278	59.294	45.3292
MitomiProbe_mut_163	AAAGCGGTAATTTGGCCTGTGGGTGCAGATATCTAT	77.1579	73.6747	68.2384	48.542
MitomiProbe_mut_1630	CGTCCTAGCGATTGACCTGTGGGTGCCATGAGGAAG	70.8886	64.7873	62.8588	49.5764
MitomiProbe_mut_1631	CGTCCTAGCGATTGACGAGTGGGTGCCATGAGGAAG	67.9626	72.7608	69.2901	63.393
MitomiProbe_mut_1632	CGTCCTAGCGATTGACGCGTGGGTGCCATGAGGAAG	75.8854	76.3509	69.2154	54.0496
MitomiProbe_mut_1633	CGTCCTAGCGATTGACGGGTGGGTGCCATGAGGAAG	61.75	67.0235	60.7153	60.4651
MitomiProbe_mut_1634	CGTCCTAGCGATTGACGTGTGGGTGCCATGAGGAAG	78.0592	70.7047	65.6097	49.9202
MitomiProbe_mut_1635	CGTCCTAGCGATTGACTAGTGGGTGCCATGAGGAAG	59.5945	71.6206	59.9231	60.6006
MitomiProbe_mut_1636	CGTCCTAGCGATTGACTCGTGGGTGCCATGAGGAAG	85.7492	76.6672	78.947	57.9883
MitomiProbe_mut_1637	CGTCCTAGCGATTGACTGGTGGGTGCCATGAGGAAG	67.437	69.9153	74.5709	54.0179
MitomiProbe_mut_1638	CGTCCTAGCGATTGACTTGTGGGTGCCATGAGGAAG	69.5911	74.2008	64.4238	53.4248
MitomiProbe_mut_1639	CGTCCTAGCGATTGAGAAGTGGGTGCCATGAGGAAG	56.9928	58.4205	71.0786	52.9556
MitomiProbe_mut_164	AAAGCGGTAATTTGGCGAGTGGGTGCAGATATCTAT	74.8515	67.0874	73.5753	62.4628
MitomiProbe_mut_1640	CGTCCTAGCGATTGAGACGTGGGTGCCATGAGGAAG	71.9992	68.5379	58.815	41.7353
MitomiProbe_mut_1641	CGTCCTAGCGATTGAGAGGTGGGTGCCATGAGGAAG	78.4593	64.7206	63.9399	58.6633
MitomiProbe_mut_1642	CGTCCTAGCGATTGAGATGTGGGTGCCATGAGGAAG	66.5492	91.0686	62.7787	49.9465
MitomiProbe_mut_1643	CGTCCTAGCGATTGAGCAGTGGGTGCCATGAGGAAG	60.9539	57.4221	58.8102	59.9115
MitomiProbe_mut_1644	CGTCCTAGCGATTGAGCCGTGGGTGCCATGAGGAAG	68.4149	66.733	57.4328	42.571
MitomiProbe_mut_1645	CGTCCTAGCGATTGAGCGGTGGGTGCCATGAGGAAG	77.4298	74.6611	63.8278	54.7167
MitomiProbe_mut_1646	CGTCCTAGCGATTGAGCTGTGGGTGCCATGAGGAAG	63.0933	62.2387	60.7269	43.5506
MitomiProbe_mut_1647	CGTCCTAGCGATTGAGGAGTGGGTGCCATGAGGAAG	77.4329	58.8766	65.8285	41.659
MitomiProbe_mut_1648	CGTCCTAGCGATTGAGGCGTGGGTGCCATGAGGAAG	66.3993	62.4695	71.72	43.2545
MitomiProbe_mut_1649	CGTCCTAGCGATTGAGGGGTGGGTGCCATGAGGAAG	80.7576	79.3708	71.4113	62.431
MitomiProbe_mut_165	AAAGCGGTAATTTGGCGCGTGGGTGCAGATATCTAT	88.7697	81.2435	70.2857	54.6129
MitomiProbe_mut_1650	CGTCCTAGCGATTGAGGTGTGGGTGCCATGAGGAAG	82.8258	74.692	64.3347	37.0429
MitomiProbe_mut_1651	CGTCCTAGCGATTGAGTAGTGGGTGCCATGAGGAAG	70.0337	68.8197	60.5254	42.3463
MitomiProbe_mut_1652	CGTCCTAGCGATTGAGTCGTGGGTGCCATGAGGAAG	74.2698	71.905	56.4353	57.6016
MitomiProbe_mut_1653	CGTCCTAGCGATTGAGTGGTGGGTGCCATGAGGAAG	76.8075	60.3824	63.0769	50.453
MitomiProbe_mut_1654	CGTCCTAGCGATTGAGTTGTGGGTGCCATGAGGAAG	74.5984	64.084	62.0696	62.746
MitomiProbe_mut_1655	CGTCCTAGCGATTGATAAGTGGGTGCCATGAGGAAG	71.5774	85.9899	63.69	52.3069
MitomiProbe_mut_1656	CGTCCTAGCGATTGATACGTGGGTGCCATGAGGAAG	98.7364	97.6814	64.216	69.513
MitomiProbe_mut_1657	CGTCCTAGCGATTGATAGGTGGGTGCCATGAGGAAG	73.2923	55.9693	60.8772	40.8623
MitomiProbe_mut_1658	CGTCCTAGCGATTGATATGTGGGTGCCATGAGGAAG	81.9	84.942	74.581	56.1634
MitomiProbe_mut_1659	CGTCCTAGCGATTGATCAGTGGGTGCCATGAGGAAG	64.5453	69.2867	62.8237	46.5684
MitomiProbe_mut_166	AAAGCGGTAATTTGGCGGGTGGGTGCAGATATCTAT	74.144	77.5695	74.1202	65.5759
MitomiProbe_mut_1660	CGTCCTAGCGATTGATCCGTGGGTGCCATGAGGAAG	74.8122	76.7843	61.358	43.5635
MitomiProbe_mut_1661	CGTCCTAGCGATTGATCGGTGGGTGCCATGAGGAAG	66.5438	74.9437	71.1952	56.642
MitomiProbe_mut_1662	CGTCCTAGCGATTGATCTGTGGGTGCCATGAGGAAG	71.7058	63.1931	73.2503	64.0922
MitomiProbe_mut_1663	CGTCCTAGCGATTGATGAGTGGGTGCCATGAGGAAG	84.1253	67.7058	73.6015	45.6053
MitomiProbe_mut_1664	CGTCCTAGCGATTGATGCGTGGGTGCCATGAGGAAG	73.2831	61.8723	64.7491	53.1675
MitomiProbe_mut_1665	CGTCCTAGCGATTGATGGGTGGGTGCCATGAGGAAG	65.8022	71.6855	79.1139	51.9152
MitomiProbe_mut_1666	CGTCCTAGCGATTGATGTGTGGGTGCCATGAGGAAG	69.3606	67.3995	50.151	59.0496
MitomiProbe_mut_1667	CGTCCTAGCGATTGATTAGTGGGTGCCATGAGGAAG	73.3191	64.3136	60.2771	59.2931
MitomiProbe_mut_1668	CGTCCTAGCGATTGATTCGTGGGTGCCATGAGGAAG	83.4322	84.2973	65.3354	47.9503
MitomiProbe_mut_1669	CGTCCTAGCGATTGATTGGTGGGTGCCATGAGGAAG	65.4447	79.7113	65.8995	45.4689
MitomiProbe_mut_167	AAAGCGGTAATTTGGCGTGTGGGTGCAGATATCTAT	84.9486	74.9228	67.1131	60.4541
MitomiProbe_mut_1670	CGTCCTAGCGATTGATTTGTGGGTGCCATGAGGAAG	77.5394	84.7443	78.3686	63.4171
MitomiProbe_mut_1671	CGTCCTAGCGATTTCCACGTGTTTTCCATGAGGAAG	811.225	458.489	215.238	94.3163
MitomiProbe_mut_1672	CGTCCTAGTGATTCACACGTGTTTTCCATGAGGAAG	1070.48	792.316	246.459	115.11
MitomiProbe_mut_1673	CGTCCTAGTGATTCCCACGTGTTTTCCATGAGGAAG	870.263	463.093	161.572	76.8564
MitomiProbe_mut_1674	CGTCCTAGTGATTCTCACGTGTTTTCCATGAGGAAG	1301.51	891.596	453.549	159.191
MitomiProbe_mut_1675	CGTCCTAGTGATTGCAAAGTGGGTGCCATGAGGAAG	75.056	79.7444	74.6105	49.3215
MitomiProbe_mut_1676	CGTCCTAGTGATTGCAACGTGGGTGCCATGAGGAAG	112.597	97.6163	77.6995	58.4145
MitomiProbe_mut_1677	CGTCCTAGTGATTGCAAGGTGGGTGCCATGAGGAAG	80.6707	79.5463	81.1517	67.3856
MitomiProbe_mut_1678	CGTCCTAGTGATTGCAATGTGGGTGCCATGAGGAAG	104.466	90.5943	69.3258	59.2033
MitomiProbe_mut_1679	CGTCCTAGTGATTGCACAGTGGGTGCCATGAGGAAG	76.1724	71.3683	69.3882	53.7231
MitomiProbe_mut_168	AAAGCGGTAATTTGGCTAGTGGGTGCAGATATCTAT	80.733	80.9091	87.2674	72.9538
MitomiProbe_mut_1680	CGTCCTAGTGATTGCACCGTGGGTGCCATGAGGAAG	75.2176	67.64	74.5445	53.0008
MitomiProbe_mut_1681	CGTCCTAGTGATTGCACGGTGGGTGCCATGAGGAAG	87.6469	83.6879	69.3127	54.9197
MitomiProbe_mut_1682	CGTCCTAGTGATTGCACTGTGGGTGCCATGAGGAAG	78.7555	69.6916	64.8049	43.8192
MitomiProbe_mut_1683	CGTCCTAGTGATTGCAGAGTGGGTGCCATGAGGAAG	88.7919	88.9226	62.4456	49.7366
MitomiProbe_mut_1684	CGTCCTAGTGATTGCAGCGTGGGTGCCATGAGGAAG	74.0898	79.6038	64.1238	51.5415
MitomiProbe_mut_1685	CGTCCTAGTGATTGCAGGGTGGGTGCCATGAGGAAG	91.474	73.2532	57.5541	51.1361
MitomiProbe_mut_1686	CGTCCTAGTGATTGCAGTGTGGGTGCCATGAGGAAG	97.0292	90.9051	77.6681	48.1987
MitomiProbe_mut_1687	CGTCCTAGTGATTGCATAGTGGGTGCCATGAGGAAG	83.2824	86.5265	66.5872	61.8987
MitomiProbe_mut_1688	CGTCCTAGTGATTGCATCGTGGGTGCCATGAGGAAG	96.3339	85.0735	77.8429	57.3754
MitomiProbe_mut_1689	CGTCCTAGTGATTGCATGGTGGGTGCCATGAGGAAG	85.5726	77.0197	68.9115	48.8784
MitomiProbe_mut_169	AAAGCGGTAATTTGGCTCGTGGGTGCAGATATCTAT	81.3363	65.7899	81.9072	65.4717
MitomiProbe_mut_1690	CGTCCTAGTGATTGCATTGTGGGTGCCATGAGGAAG	86.7395	79.8303	84.4388	55.7371
MitomiProbe_mut_1691	CGTCCTAGTGATTGCCAAGTGGGTGCCATGAGGAAG	83.6305	77.2138	68.2436	61.562
MitomiProbe_mut_1692	CGTCCTAGTGATTGCCACGTGGGTGCCATGAGGAAG	1040.31	561.124	160.471	79.1331
MitomiProbe_mut_1693	CGTCCTAGTGATTGCCACGTGTTTTCCATGAGGAAG	1104.85	600.146	229.909	77.8806
MitomiProbe_mut_1694	CGTCCTAGTGATTGCCAGGTGGGTGCCATGAGGAAG	71.3163	71.0652	70.4737	49.3788
MitomiProbe_mut_1695	CGTCCTAGTGATTGCCATGTGGGTGCCATGAGGAAG	115.978	90.2861	93.9023	57.7511
MitomiProbe_mut_1696	CGTCCTAGTGATTGCCCAGTGGGTGCCATGAGGAAG	72.441	71.6514	85.5143	62.8863
MitomiProbe_mut_1697	CGTCCTAGTGATTGCCCCGTGGGTGCCATGAGGAAG	115.397	91.8843	74.4518	60.6084
MitomiProbe_mut_1698	CGTCCTAGTGATTGCCCGGTGGGTGCCATGAGGAAG	88.3607	63.6204	66.0845	50.1431
MitomiProbe_mut_1699	CGTCCTAGTGATTGCCCTGTGGGTGCCATGAGGAAG	74.7309	75.2677	80.0308	46.4935
MitomiProbe_mut_17	AAAGCGGTAATTTGAAGAGTGGGTGCAGATATCTAT	65.1553	76.6238	66.0177	58.9662
MitomiProbe_mut_170	AAAGCGGTAATTTGGCTGGTGGGTGCAGATATCTAT	78.8503	80.2832	70.9984	69.9754
MitomiProbe_mut_1700	CGTCCTAGTGATTGCCGAGTGGGTGCCATGAGGAAG	90.1989	59.7043	75.1959	52.9699
MitomiProbe_mut_1701	CGTCCTAGTGATTGCCGCGTGGGTGCCATGAGGAAG	92.281	89.9889	79.8175	61.2146
MitomiProbe_mut_1702	CGTCCTAGTGATTGCCGGGTGGGTGCCATGAGGAAG	76.1992	58.2629	68.5344	50.1275
MitomiProbe_mut_1703	CGTCCTAGTGATTGCCGTGTGGGTGCCATGAGGAAG	78.3467	80.1442	82.8288	63.6014
MitomiProbe_mut_1704	CGTCCTAGTGATTGCCTAGTGGGTGCCATGAGGAAG	86.9279	74.8051	56.2224	51.5262
MitomiProbe_mut_1705	CGTCCTAGTGATTGCCTCGTGGGTGCCATGAGGAAG	134.285	106.936	96.354	73.2466
MitomiProbe_mut_1706	CGTCCTAGTGATTGCCTGGTGGGTGCCATGAGGAAG	65.75	79.681	70.6592	54.8454
MitomiProbe_mut_1707	CGTCCTAGTGATTGCCTTGTGGGTGCCATGAGGAAG	72.1629	81.3305	76.4751	55.9101
MitomiProbe_mut_1708	CGTCCTAGTGATTGCGAAGTGGGTGCCATGAGGAAG	81.0495	65.1392	72.2569	61.9068
MitomiProbe_mut_1709	CGTCCTAGTGATTGCGACGTGGGTGCCATGAGGAAG	82.3115	69.7568	69.9797	53.9497
MitomiProbe_mut_171	AAAGCGGTAATTTGGCTTGTGGGTGCAGATATCTAT	67.7074	70.5488	63.55	62.6412
MitomiProbe_mut_1710	CGTCCTAGTGATTGCGAGGTGGGTGCCATGAGGAAG	74.5865	74.3464	60.0226	55.8558
MitomiProbe_mut_1711	CGTCCTAGTGATTGCGATGTGGGTGCCATGAGGAAG	93.3542	91.3321	75.7647	60.4031
MitomiProbe_mut_1712	CGTCCTAGTGATTGCGCAGTGGGTGCCATGAGGAAG	78.2456	68.8579	73.2306	61.5626
MitomiProbe_mut_1713	CGTCCTAGTGATTGCGCCGTGGGTGCCATGAGGAAG	78.3715	73.4409	74.0685	51.1915
MitomiProbe_mut_1714	CGTCCTAGTGATTGCGCGGTGGGTGCCATGAGGAAG	87.3756	91.3117	74.8729	62.8412
MitomiProbe_mut_1715	CGTCCTAGTGATTGCGCTGTGGGTGCCATGAGGAAG	63.9785	76.0037	68.8733	62.4167
MitomiProbe_mut_1716	CGTCCTAGTGATTGCGGAGTGGGTGCCATGAGGAAG	78.3272	74.1438	78.0845	46.2628
MitomiProbe_mut_1717	CGTCCTAGTGATTGCGGCGTGGGTGCCATGAGGAAG	81.6511	76.6939	72.8162	57.2889
MitomiProbe_mut_1718	CGTCCTAGTGATTGCGGGGTGGGTGCCATGAGGAAG	101.126	93.8997	77.8019	59.2119
MitomiProbe_mut_1719	CGTCCTAGTGATTGCGGTGTGGGTGCCATGAGGAAG	77.9774	76.4794	79.1026	65.9531
MitomiProbe_mut_172	AAAGCGGTAATTTGGGAAGTGGGTGCAGATATCTAT	75.1809	78.765	68.2088	57.8052
MitomiProbe_mut_1720	CGTCCTAGTGATTGCGTAGTGGGTGCCATGAGGAAG	82.5656	79.635	74.0718	58.0592
MitomiProbe_mut_1721	CGTCCTAGTGATTGCGTCGTGGGTGCCATGAGGAAG	77.7233	88.7064	75.7515	62.5061
MitomiProbe_mut_1722	CGTCCTAGTGATTGCGTGGTGGGTGCCATGAGGAAG	88.3062	88.3819	82.3467	58.6291
MitomiProbe_mut_1723	CGTCCTAGTGATTGCGTTGTGGGTGCCATGAGGAAG	82.0667	79.3339	76.7436	62.2715
MitomiProbe_mut_1724	CGTCCTAGTGATTGCTAAGTGGGTGCCATGAGGAAG	92.1686	86.1019	69.6668	62.0804
MitomiProbe_mut_1725	CGTCCTAGTGATTGCTACGTGGGTGCCATGAGGAAG	91.1094	80.7216	77.3134	57.1755
MitomiProbe_mut_1726	CGTCCTAGTGATTGCTAGGTGGGTGCCATGAGGAAG	76.1953	76.0347	68.5693	57.936
MitomiProbe_mut_1727	CGTCCTAGTGATTGCTATGTGGGTGCCATGAGGAAG	91.9578	89	83.0748	60.7919
MitomiProbe_mut_1728	CGTCCTAGTGATTGCTCAGTGGGTGCCATGAGGAAG	78.2571	74.3694	62.7226	63.8352
MitomiProbe_mut_1729	CGTCCTAGTGATTGCTCCGTGGGTGCCATGAGGAAG	79.2923	68.7035	73.7477	52.7974
MitomiProbe_mut_173	AAAGCGGTAATTTGGGACGTGGGTGCAGATATCTAT	62.3441	86.1697	61.5497	58.4781
MitomiProbe_mut_1730	CGTCCTAGTGATTGCTCGGTGGGTGCCATGAGGAAG	70.9844	66.0385	71.3498	60.3568
MitomiProbe_mut_1731	CGTCCTAGTGATTGCTCTGTGGGTGCCATGAGGAAG	84.6251	74.0715	65.594	50.6999
MitomiProbe_mut_1732	CGTCCTAGTGATTGCTGAGTGGGTGCCATGAGGAAG	73.1121	81.3928	72.1371	57.2717
MitomiProbe_mut_1733	CGTCCTAGTGATTGCTGCGTGGGTGCCATGAGGAAG	84.1057	77.8401	69.5403	57.9335
MitomiProbe_mut_1734	CGTCCTAGTGATTGCTGGGTGGGTGCCATGAGGAAG	75.4056	76.7468	71.7113	56.9394
MitomiProbe_mut_1735	CGTCCTAGTGATTGCTGTGTGGGTGCCATGAGGAAG	96.66	84.7067	83.2431	49.7322
MitomiProbe_mut_1736	CGTCCTAGTGATTGCTTAGTGGGTGCCATGAGGAAG	87.7211	76.0364	67.8232	62.5523
MitomiProbe_mut_1737	CGTCCTAGTGATTGCTTCGTGGGTGCCATGAGGAAG	91.4677	72.5804	80.8161	59.9225
MitomiProbe_mut_1738	CGTCCTAGTGATTGCTTGGTGGGTGCCATGAGGAAG	74.6472	72.5038	69.7462	64.7888
MitomiProbe_mut_1739	CGTCCTAGTGATTGCTTTGTGGGTGCCATGAGGAAG	85.532	82.158	80.7222	52.6574
MitomiProbe_mut_174	AAAGCGGTAATTTGGGAGGTGGGTGCAGATATCTAT	75.7862	69.159	76.8613	72.3686
MitomiProbe_mut_1740	CGTCCTAGTGATTGGAAAGTGGGTGCCATGAGGAAG	76.1813	76.1319	78.6803	57.1471
MitomiProbe_mut_1741	CGTCCTAGTGATTGGAACGTGGGTGCCATGAGGAAG	93.015	110.029	87.971	67.305
MitomiProbe_mut_1742	CGTCCTAGTGATTGGAAGGTGGGTGCCATGAGGAAG	71.435	76.7101	65.6806	56.7934
MitomiProbe_mut_1743	CGTCCTAGTGATTGGAATGTGGGTGCCATGAGGAAG	77.5083	98.9489	82.9361	59.2811
MitomiProbe_mut_1744	CGTCCTAGTGATTGGACAGTGGGTGCCATGAGGAAG	80.3863	65.5399	70.4541	51.694
MitomiProbe_mut_1745	CGTCCTAGTGATTGGACCGTGGGTGCCATGAGGAAG	64.292	78.0078	66.6396	51.433
MitomiProbe_mut_1746	CGTCCTAGTGATTGGACGGTGGGTGCCATGAGGAAG	76.4419	68.4589	57.2612	51.7325
MitomiProbe_mut_1747	CGTCCTAGTGATTGGACTGTGGGTGCCATGAGGAAG	74.205	70.5541	78.135	48.7294
MitomiProbe_mut_1748	CGTCCTAGTGATTGGAGAGTGGGTGCCATGAGGAAG	74.93	72.3631	71.8639	47.2879
MitomiProbe_mut_1749	CGTCCTAGTGATTGGAGCGTGGGTGCCATGAGGAAG	98.837	80.3281	72.2341	52.5728
MitomiProbe_mut_175	AAAGCGGTAATTTGGGATGTGGGTGCAGATATCTAT	75.7069	80.3422	75.7108	72.0338
MitomiProbe_mut_1750	CGTCCTAGTGATTGGAGGGTGGGTGCCATGAGGAAG	89.8326	77.606	81.0255	60.1755
MitomiProbe_mut_1751	CGTCCTAGTGATTGGAGTGTGGGTGCCATGAGGAAG	83.3857	77.9566	69.4771	56.0308
MitomiProbe_mut_1752	CGTCCTAGTGATTGGATAGTGGGTGCCATGAGGAAG	70.7456	79.1657	82.776	57.0923
MitomiProbe_mut_1753	CGTCCTAGTGATTGGATCGTGGGTGCCATGAGGAAG	89.945	77.8807	71.9219	57.3175
MitomiProbe_mut_1754	CGTCCTAGTGATTGGATGGTGGGTGCCATGAGGAAG	83.2	66.4012	82	49.9848
MitomiProbe_mut_1755	CGTCCTAGTGATTGGATTGTGGGTGCCATGAGGAAG	88.7601	88.3551	84.2542	60.7897
MitomiProbe_mut_1756	CGTCCTAGTGATTGGCAAGTGGGTGCCATGAGGAAG	75.0093	83.0816	70.1599	52.6029
MitomiProbe_mut_1757	CGTCCTAGTGATTGGCACGTGGGTGCCATGAGGAAG	1096.11	477.704	174.122	77.0401
MitomiProbe_mut_1758	CGTCCTAGTGATTGGCACGTGTTTTCCATGAGGAAG	2026.59	1263.92	308.571	98.532
MitomiProbe_mut_1759	CGTCCTAGTGATTGGCAGGTGGGTGCCATGAGGAAG	77.8796	77.8252	72.5129	46.54
MitomiProbe_mut_176	AAAGCGGTAATTTGGGCAGTGGGTGCAGATATCTAT	78.3546	79.1758	79.024	60.2317
MitomiProbe_mut_1760	CGTCCTAGTGATTGGCATGTGGGTGCCATGAGGAAG	99.8593	82.7694	77.5	73.356
MitomiProbe_mut_1761	CGTCCTAGTGATTGGCCAGTGGGTGCCATGAGGAAG	74.0639	68.602	61.7146	47.8861
MitomiProbe_mut_1762	CGTCCTAGTGATTGGCCCGTGGGTGCCATGAGGAAG	71.8807	79.7471	66.3846	51.4622
MitomiProbe_mut_1763	CGTCCTAGTGATTGGCCGGTGGGTGCCATGAGGAAG	72.7285	65.2636	61.6921	54.8695
MitomiProbe_mut_1764	CGTCCTAGTGATTGGCCTGTGGGTGCCATGAGGAAG	86.404	84.699	77.5435	60.8888
MitomiProbe_mut_1765	CGTCCTAGTGATTGGCGAGTGGGTGCCATGAGGAAG	85.8864	83.4848	78.5233	57.5781
MitomiProbe_mut_1766	CGTCCTAGTGATTGGCGCGTGGGTGCCATGAGGAAG	92.0681	98.2007	67.7607	59.9662
MitomiProbe_mut_1767	CGTCCTAGTGATTGGCGGGTGGGTGCCATGAGGAAG	69.5522	75.1635	62.1249	56.3111
MitomiProbe_mut_1768	CGTCCTAGTGATTGGCGTGTGGGTGCCATGAGGAAG	102.747	91.9276	67.1008	55.9808
MitomiProbe_mut_1769	CGTCCTAGTGATTGGCTAGTGGGTGCCATGAGGAAG	74.2182	65.1713	71.0024	52.3467
MitomiProbe_mut_177	AAAGCGGTAATTTGGGCCGTGGGTGCAGATATCTAT	83.078	64.3871	62.6481	57.2742
MitomiProbe_mut_1770	CGTCCTAGTGATTGGCTCGTGGGTGCCATGAGGAAG	87.7681	86.6379	91.7825	59.3115
MitomiProbe_mut_1771	CGTCCTAGTGATTGGCTGGTGGGTGCCATGAGGAAG	75.1373	67.6779	68.4084	51.522
MitomiProbe_mut_1772	CGTCCTAGTGATTGGCTTGTGGGTGCCATGAGGAAG	81.6636	77.5144	73.5071	61.5935
MitomiProbe_mut_1773	CGTCCTAGTGATTGGGAAGTGGGTGCCATGAGGAAG	71.4895	70.0122	68.0928	51.6507
MitomiProbe_mut_1774	CGTCCTAGTGATTGGGACGTGGGTGCCATGAGGAAG	74.6425	75.8945	66.2142	51.2538
MitomiProbe_mut_1775	CGTCCTAGTGATTGGGAGGTGGGTGCCATGAGGAAG	85.085	68.5837	71.3538	47.9352
MitomiProbe_mut_1776	CGTCCTAGTGATTGGGATGTGGGTGCCATGAGGAAG	89.1637	83.3227	76.3938	54.0931
MitomiProbe_mut_1777	CGTCCTAGTGATTGGGCAGTGGGTGCCATGAGGAAG	77.7328	73.9154	63.5598	53.1607
MitomiProbe_mut_1778	CGTCCTAGTGATTGGGCCGTGGGTGCCATGAGGAAG	70.7944	72.4441	64.7681	52.8815
MitomiProbe_mut_1779	CGTCCTAGTGATTGGGCGGTGGGTGCCATGAGGAAG	73.5182	80.7036	72.0902	59.1892
MitomiProbe_mut_178	AAAGCGGTAATTTGGGCGGTGGGTGCAGATATCTAT	71.8976	66.6613	65.3784	56.4273
MitomiProbe_mut_1780	CGTCCTAGTGATTGGGCTGTGGGTGCCATGAGGAAG	79.2529	73.8525	64.5401	59.5684
MitomiProbe_mut_1781	CGTCCTAGTGATTGGGGAGTGGGTGCCATGAGGAAG	77.5888	68.1252	72.5905	51.0476
MitomiProbe_mut_1782	CGTCCTAGTGATTGGGGCGTGGGTGCCATGAGGAAG	84.3065	81.6932	63.729	47.8242
MitomiProbe_mut_1783	CGTCCTAGTGATTGGGGGGTGGGTGCCATGAGGAAG	125.797	133.787	120.36	69.5328
MitomiProbe_mut_1784	CGTCCTAGTGATTGGGGTGTGGGTGCCATGAGGAAG	80.6938	81.7195	84.63	51.6484
MitomiProbe_mut_1785	CGTCCTAGTGATTGGGTAGTGGGTGCCATGAGGAAG	84.1108	90.4735	68.4252	67.5678
MitomiProbe_mut_1786	CGTCCTAGTGATTGGGTCGTGGGTGCCATGAGGAAG	76.2675	72.5849	64.7177	51.7827
MitomiProbe_mut_1787	CGTCCTAGTGATTGGGTGGTGGGTGCCATGAGGAAG	80.2029	87.6162	69.3672	56.0723
MitomiProbe_mut_1788	CGTCCTAGTGATTGGGTTGTGGGTGCCATGAGGAAG	96.2062	82.0217	75.9259	59.7371
MitomiProbe_mut_1789	CGTCCTAGTGATTGGTAAGTGGGTGCCATGAGGAAG	92.8228	86.9104	76.0811	51.7831
MitomiProbe_mut_179	AAAGCGGTAATTTGGGCTGTGGGTGCAGATATCTAT	73.5166	81.3276	93.3138	57.4327
MitomiProbe_mut_1790	CGTCCTAGTGATTGGTACGTGGGTGCCATGAGGAAG	78.0277	68.1186	73.3133	55.4049
MitomiProbe_mut_1791	CGTCCTAGTGATTGGTAGGTGGGTGCCATGAGGAAG	76.5816	71.3684	71.6322	54.2325
MitomiProbe_mut_1792	CGTCCTAGTGATTGGTATGTGGGTGCCATGAGGAAG	97.5715	79.0172	89.0864	61.3374
MitomiProbe_mut_1793	CGTCCTAGTGATTGGTCAGTGGGTGCCATGAGGAAG	87.5977	86.2654	82.4881	56.95
MitomiProbe_mut_1794	CGTCCTAGTGATTGGTCCGTGGGTGCCATGAGGAAG	76.2352	72.1209	77.0966	60.4545
MitomiProbe_mut_1795	CGTCCTAGTGATTGGTCGGTGGGTGCCATGAGGAAG	78.9551	90.0361	74.119	50.6362
MitomiProbe_mut_1796	CGTCCTAGTGATTGGTCTGTGGGTGCCATGAGGAAG	85.7307	85.7503	74.7454	57.1449
MitomiProbe_mut_1797	CGTCCTAGTGATTGGTGAGTGGGTGCCATGAGGAAG	95.7503	82.3066	70.9957	61.3305
MitomiProbe_mut_1798	CGTCCTAGTGATTGGTGCGTGGGTGCCATGAGGAAG	97.9136	83.0797	82.713	57.0682
MitomiProbe_mut_1799	CGTCCTAGTGATTGGTGGGTGGGTGCCATGAGGAAG	81.3125	80.0722	77.5157	61.7683
MitomiProbe_mut_18	AAAGCGGTAATTTGAAGCGTGGGTGCAGATATCTAT	78.8568	79.3211	75.5188	57.2379
MitomiProbe_mut_180	AAAGCGGTAATTTGGGGAGTGGGTGCAGATATCTAT	75.0397	77.496	69.9214	69.0235
MitomiProbe_mut_1800	CGTCCTAGTGATTGGTGTGTGGGTGCCATGAGGAAG	96.9133	76.5912	70.985	64.6071
MitomiProbe_mut_1801	CGTCCTAGTGATTGGTTAGTGGGTGCCATGAGGAAG	73.6382	79.2676	96.9234	62.0867
MitomiProbe_mut_1802	CGTCCTAGTGATTGGTTCGTGGGTGCCATGAGGAAG	75.4494	78.2211	74.9665	54.822
MitomiProbe_mut_1803	CGTCCTAGTGATTGGTTGGTGGGTGCCATGAGGAAG	71.0331	89.3034	75.9364	52.7841
MitomiProbe_mut_1804	CGTCCTAGTGATTGGTTTGTGGGTGCCATGAGGAAG	84.1465	79.2346	81.5955	72.7946
MitomiProbe_mut_1805	CGTCCTAGTGATTGTAAAGTGGGTGCCATGAGGAAG	86.0304	86.4939	87.0054	61.6694
MitomiProbe_mut_1806	CGTCCTAGTGATTGTAACGTGGGTGCCATGAGGAAG	108.536	91.402	82	64.2718
MitomiProbe_mut_1807	CGTCCTAGTGATTGTAAGGTGGGTGCCATGAGGAAG	83.2327	92.8256	71.5982	62.4746
MitomiProbe_mut_1808	CGTCCTAGTGATTGTAATGTGGGTGCCATGAGGAAG	82.5504	83.5962	88.2656	54.2003
MitomiProbe_mut_1809	CGTCCTAGTGATTGTACAGTGGGTGCCATGAGGAAG	82.3752	81.5217	65.9763	55.2863
MitomiProbe_mut_181	AAAGCGGTAATTTGGGGCGTGGGTGCAGATATCTAT	78.8858	68.9838	65.5132	59.0115
MitomiProbe_mut_1810	CGTCCTAGTGATTGTACCGTGGGTGCCATGAGGAAG	87.22	67.8466	65.0506	60.5508
MitomiProbe_mut_1811	CGTCCTAGTGATTGTACGGTGGGTGCCATGAGGAAG	69.0996	72.0141	64.2521	57.4931
MitomiProbe_mut_1812	CGTCCTAGTGATTGTACTGTGGGTGCCATGAGGAAG	107.852	92.0533	90.3658	61.8359
MitomiProbe_mut_1813	CGTCCTAGTGATTGTAGAGTGGGTGCCATGAGGAAG	82.4052	82.0469	75.5674	59.0305
MitomiProbe_mut_1814	CGTCCTAGTGATTGTAGCGTGGGTGCCATGAGGAAG	84.2456	80.2624	72.0314	51.6177
MitomiProbe_mut_1815	CGTCCTAGTGATTGTAGGGTGGGTGCCATGAGGAAG	84.277	92.2328	79.5449	52.9305
MitomiProbe_mut_1816	CGTCCTAGTGATTGTAGTGTGGGTGCCATGAGGAAG	83.1046	84.3158	78.3195	64.9647
MitomiProbe_mut_1817	CGTCCTAGTGATTGTATAGTGGGTGCCATGAGGAAG	90.7145	71.4506	82.2794	62.4955
MitomiProbe_mut_1818	CGTCCTAGTGATTGTATCGTGGGTGCCATGAGGAAG	76.1852	78.2225	65.514	60.44
MitomiProbe_mut_1819	CGTCCTAGTGATTGTATGGTGGGTGCCATGAGGAAG	85.3883	82.3607	69.1077	58.4049
MitomiProbe_mut_182	AAAGCGGTAATTTGGGGGGTGGGTGCAGATATCTAT	185.774	196.539	126.511	92.2956
MitomiProbe_mut_1820	CGTCCTAGTGATTGTATTGTGGGTGCCATGAGGAAG	99.4803	83.5307	91.3843	63.5417
MitomiProbe_mut_1821	CGTCCTAGTGATTGTCAAGTGGGTGCCATGAGGAAG	98.4616	74.0021	73.6403	60.2466
MitomiProbe_mut_1822	CGTCCTAGTGATTGTCACAAAACTTCCATGAGGAAG	81.8564	95.0865	82.8715	75.6666
MitomiProbe_mut_1823	CGTCCTAGTGATTGTCACAACACTTCCATGAGGAAG	120.707	117.214	102.597	83.2628
MitomiProbe_mut_1824	CGTCCTAGTGATTGTCACAAGACTTCCATGAGGAAG	144.129	146.013	148.943	116.712
MitomiProbe_mut_1825	CGTCCTAGTGATTGTCACAATACTTCCATGAGGAAG	97.9764	99.5069	90.4135	78.5534
MitomiProbe_mut_1826	CGTCCTAGTGATTGTCACACAACTTCCATGAGGAAG	80.1929	76.6705	74.6777	67.1345
MitomiProbe_mut_1827	CGTCCTAGTGATTGTCACACCACTTCCATGAGGAAG	130.422	131.986	140.522	103.738
MitomiProbe_mut_1828	CGTCCTAGTGATTGTCACACGACTTCCATGAGGAAG	125.765	152.387	104.967	86.7296
MitomiProbe_mut_1829	CGTCCTAGTGATTGTCACACTACTTCCATGAGGAAG	92.561	107.339	95.4288	87.7619
MitomiProbe_mut_183	AAAGCGGTAATTTGGGGTGTGGGTGCAGATATCTAT	80.4806	71.5495	61.7449	54.5749
MitomiProbe_mut_1830	CGTCCTAGTGATTGTCACAGAACTTCCATGAGGAAG	79.0124	90.8737	72.5542	62.1371
MitomiProbe_mut_1831	CGTCCTAGTGATTGTCACAGCACTTCCATGAGGAAG	91.0394	86.9402	76.0785	61.7269
MitomiProbe_mut_1832	CGTCCTAGTGATTGTCACAGGACTTCCATGAGGAAG	112.712	110.309	106.097	100.285
MitomiProbe_mut_1833	CGTCCTAGTGATTGTCACAGTACTTCCATGAGGAAG	95.4015	101.741	71.1503	71.3802
MitomiProbe_mut_1834	CGTCCTAGTGATTGTCACATAACTTCCATGAGGAAG	103.567	89.5115	80.1505	69.6759
MitomiProbe_mut_1835	CGTCCTAGTGATTGTCACATCACTTCCATGAGGAAG	88.5818	83.5361	88.7667	74.4106
MitomiProbe_mut_1836	CGTCCTAGTGATTGTCACATGACTTCCATGAGGAAG	3589.93	2338.36	3293.85	2238.23
MitomiProbe_mut_1837	CGTCCTAGTGATTGTCACATTACTTCCATGAGGAAG	123.111	132.382	109.388	92.5725
MitomiProbe_mut_1838	CGTCCTAGTGATTGTCACCAAACTTCCATGAGGAAG	75.0455	93.6125	77.3875	64.2263
MitomiProbe_mut_1839	CGTCCTAGTGATTGTCACCACACTTCCATGAGGAAG	95.8533	89.4411	73.3419	67.2671
MitomiProbe_mut_184	AAAGCGGTAATTTGGGTAGTGGGTGCAGATATCTAT	107.573	79.1268	78.5352	58.4512
MitomiProbe_mut_1840	CGTCCTAGTGATTGTCACCAGACTTCCATGAGGAAG	95.0005	100.258	89.9264	76.3472
MitomiProbe_mut_1841	CGTCCTAGTGATTGTCACCATACTTCCATGAGGAAG	92.7881	91.1995	89.7693	59.1188
MitomiProbe_mut_1842	CGTCCTAGTGATTGTCACCCAACTTCCATGAGGAAG	91.1437	77.5237	79.9331	72.5452
MitomiProbe_mut_1843	CGTCCTAGTGATTGTCACCCCACTTCCATGAGGAAG	82.0019	75.7708	71.7556	63.7008
MitomiProbe_mut_1844	CGTCCTAGTGATTGTCACCCGACTTCCATGAGGAAG	78.6264	78.0801	64.2049	66.4773
MitomiProbe_mut_1845	CGTCCTAGTGATTGTCACCCTACTTCCATGAGGAAG	74.8617	72.6261	65.2663	50.9515
MitomiProbe_mut_1846	CGTCCTAGTGATTGTCACCGAACTTCCATGAGGAAG	83.8096	78.9685	69.8339	66.8318
MitomiProbe_mut_1847	CGTCCTAGTGATTGTCACCGCACTTCCATGAGGAAG	75.2392	78.6052	57.159	59.3927
MitomiProbe_mut_1848	CGTCCTAGTGATTGTCACCGGACTTCCATGAGGAAG	79.6384	83.1004	79.6667	66.9718
MitomiProbe_mut_1849	CGTCCTAGTGATTGTCACCGTACTTCCATGAGGAAG	71.4529	76.3582	75.8348	58.1682
MitomiProbe_mut_185	AAAGCGGTAATTTGGGTCGTGGGTGCAGATATCTAT	93.0107	92.3497	81.06	57.7684
MitomiProbe_mut_1850	CGTCCTAGTGATTGTCACCTAACTTCCATGAGGAAG	76.9135	77.7554	63.0331	55.0132
MitomiProbe_mut_1851	CGTCCTAGTGATTGTCACCTCACTTCCATGAGGAAG	81.7341	83.252	74.7207	58.2629
MitomiProbe_mut_1852	CGTCCTAGTGATTGTCACCTGACTTCCATGAGGAAG	1684.06	1770.18	1604.55	1332.03
MitomiProbe_mut_1853	CGTCCTAGTGATTGTCACCTTACTTCCATGAGGAAG	91.9286	82.0281	77.4189	63.3608
MitomiProbe_mut_1854	CGTCCTAGTGATTGTCACGAAACTTCCATGAGGAAG	93.9934	96.8752	79.5882	64.32
MitomiProbe_mut_1855	CGTCCTAGTGATTGTCACGACACTTCCATGAGGAAG	221.383	186.38	220.926	149.126
MitomiProbe_mut_1856	CGTCCTAGTGATTGTCACGAGACTTCCATGAGGAAG	1078.31	927.099	880.643	491.638
MitomiProbe_mut_1857	CGTCCTAGTGATTGTCACGATACTTCCATGAGGAAG	234.48	243.34	250.101	154.517
MitomiProbe_mut_1858	CGTCCTAGTGATTGTCACGCAACTTCCATGAGGAAG	151.99	152.716	115.253	86.4932
MitomiProbe_mut_1859	CGTCCTAGTGATTGTCACGCCACTTCCATGAGGAAG	248.908	274.079	231.943	159.791
MitomiProbe_mut_186	AAAGCGGTAATTTGGGTGGTGGGTGCAGATATCTAT	74.6529	65.4809	70.2055	58.2782
MitomiProbe_mut_1860	CGTCCTAGTGATTGTCACGCGACTTCCATGAGGAAG	634.269	681.195	586.603	243.53
MitomiProbe_mut_1861	CGTCCTAGTGATTGTCACGCTACTTCCATGAGGAAG	238.848	237.282	228.233	113.473
MitomiProbe_mut_1862	CGTCCTAGTGATTGTCACGGAACTTCCATGAGGAAG	92.2361	103.643	90.0133	98.12
MitomiProbe_mut_1863	CGTCCTAGTGATTGTCACGGCACTTCCATGAGGAAG	100.919	89.7101	90.9777	80.9061
MitomiProbe_mut_1864	CGTCCTAGTGATTGTCACGGGACTTCCATGAGGAAG	1337.43	1043.04	1114.52	740.983
MitomiProbe_mut_1865	CGTCCTAGTGATTGTCACGGTACTTCCATGAGGAAG	245.309	209.565	201.977	127.269
MitomiProbe_mut_1866	CGTCCTAGTGATTGTCACGTAACTTCCATGAGGAAG	126.375	129.398	111.329	94.8098
MitomiProbe_mut_1867	CGTCCTAGTGATTGTCACGTCACTTCCATGAGGAAG	130.073	131.936	133.226	84.8415
MitomiProbe_mut_1868	CGTCCTAGTGATTGTCACGTGACTTCCATGAGGAAG	24825.1	30151.9	34134.1	30185.8
MitomiProbe_mut_1869	CGTCCTAGTGATTGTCACGTGGGTGCCATGAGGAAG	4203.11	2143.65	672.44	169.757
MitomiProbe_mut_187	AAAGCGGTAATTTGGGTTGTGGGTGCAGATATCTAT	76.566	79.9797	60.8471	61.3348
MitomiProbe_mut_1870	CGTCCTAGTGATTGTCACGTGTTTTCCATGAGGAAG	6551.67	6408.61	2569.21	641.269
MitomiProbe_mut_1871	CGTCCTAGTGATTGTCACGTTACTTCCATGAGGAAG	750.684	867.331	575.886	350.633
MitomiProbe_mut_1872	CGTCCTAGTGATTGTCACTAAACTTCCATGAGGAAG	91.7091	89.3296	73.7767	64.4621
MitomiProbe_mut_1873	CGTCCTAGTGATTGTCACTACACTTCCATGAGGAAG	87.047	83.6829	78.7843	65.3038
MitomiProbe_mut_1874	CGTCCTAGTGATTGTCACTAGACTTCCATGAGGAAG	72.9837	78.2888	88.8779	66.0864
MitomiProbe_mut_1875	CGTCCTAGTGATTGTCACTATACTTCCATGAGGAAG	80.7165	80.8637	81.7222	65.4165
MitomiProbe_mut_1876	CGTCCTAGTGATTGTCACTCAACTTCCATGAGGAAG	93.4818	82.5361	75.0675	57.5045
MitomiProbe_mut_1877	CGTCCTAGTGATTGTCACTCCACTTCCATGAGGAAG	90.9772	76.1823	66.6877	61.4196
MitomiProbe_mut_1878	CGTCCTAGTGATTGTCACTCGACTTCCATGAGGAAG	77.0021	73.8796	70.1157	56.95
MitomiProbe_mut_1879	CGTCCTAGTGATTGTCACTCTACTTCCATGAGGAAG	70.6025	74.3613	66.85	56.8555
MitomiProbe_mut_188	AAAGCGGTAATTTGGTAAGTGGGTGCAGATATCTAT	73.415	77.0901	66.2242	60.7278
MitomiProbe_mut_1880	CGTCCTAGTGATTGTCACTGAACTTCCATGAGGAAG	89.1675	84.68	71.4563	51.8935
MitomiProbe_mut_1881	CGTCCTAGTGATTGTCACTGCACTTCCATGAGGAAG	96.9042	69.9626	73.2875	62.2982
MitomiProbe_mut_1882	CGTCCTAGTGATTGTCACTGGACTTCCATGAGGAAG	108.681	101.377	91.3604	71.8273
MitomiProbe_mut_1883	CGTCCTAGTGATTGTCACTGTACTTCCATGAGGAAG	94.5829	88.9605	72.4133	65.9673
MitomiProbe_mut_1884	CGTCCTAGTGATTGTCACTTAACTTCCATGAGGAAG	83.0231	75.3818	88.8963	69.5938
MitomiProbe_mut_1885	CGTCCTAGTGATTGTCACTTCACTTCCATGAGGAAG	75.075	90.1133	76.5693	56.0992
MitomiProbe_mut_1886	CGTCCTAGTGATTGTCACTTGACTTCCATGAGGAAG	166.444	164.921	150.549	137.884
MitomiProbe_mut_1887	CGTCCTAGTGATTGTCACTTTACTTCCATGAGGAAG	90.8834	83.1295	79.4248	64.9573
MitomiProbe_mut_1888	CGTCCTAGTGATTGTCAGGTGGGTGCCATGAGGAAG	165.984	165.921	134.106	84.4638
MitomiProbe_mut_1889	CGTCCTAGTGATTGTCATGTGGGTGCCATGAGGAAG	198.739	209.703	126.707	80.8515
MitomiProbe_mut_189	AAAGCGGTAATTTGGTACGTGGGTGCAGATATCTAT	73.9054	71.4312	60.0093	59.1286
MitomiProbe_mut_1890	CGTCCTAGTGATTGTCCAGTGGGTGCCATGAGGAAG	79.9172	87.7566	81.8922	62.8769
MitomiProbe_mut_1891	CGTCCTAGTGATTGTCCCGTGGGTGCCATGAGGAAG	126.5	122.113	94.3322	70.3583
MitomiProbe_mut_1892	CGTCCTAGTGATTGTCCGGTGGGTGCCATGAGGAAG	85.2153	72.9872	66.25	52.9463
MitomiProbe_mut_1893	CGTCCTAGTGATTGTCCTGTGGGTGCCATGAGGAAG	84.8703	86.3208	95.6667	62.8618
MitomiProbe_mut_1894	CGTCCTAGTGATTGTCGAGTGGGTGCCATGAGGAAG	91.4136	76.2535	79.2732	55.7571
MitomiProbe_mut_1895	CGTCCTAGTGATTGTCGCGTGGGTGCCATGAGGAAG	109.427	85.4371	75.9069	59.8961
MitomiProbe_mut_1896	CGTCCTAGTGATTGTCGGGTGGGTGCCATGAGGAAG	79.7857	78.571	57.1426	51.169
MitomiProbe_mut_1897	CGTCCTAGTGATTGTCGTGTGGGTGCCATGAGGAAG	94.7455	86.3936	84.1264	58.3228
MitomiProbe_mut_1898	CGTCCTAGTGATTGTCTAGTGGGTGCCATGAGGAAG	82.1722	91.5542	88.8333	49.3372
MitomiProbe_mut_1899	CGTCCTAGTGATTGTCTCGTGGGTGCCATGAGGAAG	137.115	115.041	93.8335	68.4016
MitomiProbe_mut_19	AAAGCGGTAATTTGAAGGGTGGGTGCAGATATCTAT	72.2485	79.5411	61.4214	66.4224
MitomiProbe_mut_190	AAAGCGGTAATTTGGTAGGTGGGTGCAGATATCTAT	80.8476	76.1093	81.7291	58.0841
MitomiProbe_mut_1900	CGTCCTAGTGATTGTCTGGTGGGTGCCATGAGGAAG	79.0416	79.953	69.3206	56.2562
MitomiProbe_mut_1901	CGTCCTAGTGATTGTCTTGTGGGTGCCATGAGGAAG	84.6549	76.1832	88.0326	52.4872
MitomiProbe_mut_1902	CGTCCTAGTGATTGTGAAGTGGGTGCCATGAGGAAG	90.7172	65.2367	83.5534	79.4927
MitomiProbe_mut_1903	CGTCCTAGTGATTGTGACGTGGGTGCCATGAGGAAG	80.5807	87.9662	76.0364	43.9052
MitomiProbe_mut_1904	CGTCCTAGTGATTGTGAGGTGGGTGCCATGAGGAAG	80.4853	70.6545	66.9922	56.072
MitomiProbe_mut_1905	CGTCCTAGTGATTGTGATGTGGGTGCCATGAGGAAG	91.4691	85.0907	76.4739	64.4863
MitomiProbe_mut_1906	CGTCCTAGTGATTGTGCAGTGGGTGCCATGAGGAAG	84.5215	74.4313	72.4236	51.6346
MitomiProbe_mut_1907	CGTCCTAGTGATTGTGCCGTGGGTGCCATGAGGAAG	82.2893	73.076	65.283	62.6335
MitomiProbe_mut_1908	CGTCCTAGTGATTGTGCGGTGGGTGCCATGAGGAAG	90.1786	76.1701	73.6426	63.8087
MitomiProbe_mut_1909	CGTCCTAGTGATTGTGCTGTGGGTGCCATGAGGAAG	91.6597	88.346	68.9599	61.8568
MitomiProbe_mut_191	AAAGCGGTAATTTGGTATGTGGGTGCAGATATCTAT	71.4	73.015	71.1697	62.9145
MitomiProbe_mut_1910	CGTCCTAGTGATTGTGGAGTGGGTGCCATGAGGAAG	90.3129	84.9039	90.2166	59.8961
MitomiProbe_mut_1911	CGTCCTAGTGATTGTGGCGTGGGTGCCATGAGGAAG	78.3225	80.6347	73.0484	57.0604
MitomiProbe_mut_1912	CGTCCTAGTGATTGTGGGGTGGGTGCCATGAGGAAG	86.012	96.4603	84.5625	56.8641
MitomiProbe_mut_1913	CGTCCTAGTGATTGTGGTGTGGGTGCCATGAGGAAG	93.3072	86.2655	68.1198	58.2353
MitomiProbe_mut_1914	CGTCCTAGTGATTGTGTAGTGGGTGCCATGAGGAAG	96.5198	83.1499	82.133	62.816
MitomiProbe_mut_1915	CGTCCTAGTGATTGTGTCGTGGGTGCCATGAGGAAG	74.754	74.1032	64.3979	60.0462
MitomiProbe_mut_1916	CGTCCTAGTGATTGTGTGGTGGGTGCCATGAGGAAG	91.7623	82.0055	73.0807	57.0604
MitomiProbe_mut_1917	CGTCCTAGTGATTGTGTTGTGGGTGCCATGAGGAAG	87.807	88.0939	79.0903	78.2324
MitomiProbe_mut_1918	CGTCCTAGTGATTGTTAAGTGGGTGCCATGAGGAAG	96.5174	81.3727	78.6778	71.7505
MitomiProbe_mut_1919	CGTCCTAGTGATTGTTACGTGGGTGCCATGAGGAAG	91.1404	88.4346	82.1911	51.5189
MitomiProbe_mut_192	AAAGCGGTAATTTGGTCAGTGGGTGCAGATATCTAT	81.7242	87.8734	87.4481	69.062
MitomiProbe_mut_1920	CGTCCTAGTGATTGTTAGGTGGGTGCCATGAGGAAG	77.7699	73.7807	71.7237	57.6227
MitomiProbe_mut_1921	CGTCCTAGTGATTGTTATGTGGGTGCCATGAGGAAG	92.0152	89.7674	83.0513	71.5819
MitomiProbe_mut_1922	CGTCCTAGTGATTGTTCAGTGGGTGCCATGAGGAAG	86.7194	79.7292	64.9167	53.5791
MitomiProbe_mut_1923	CGTCCTAGTGATTGTTCCGTGGGTGCCATGAGGAAG	87.7548	82.3514	76.1433	51.3124
MitomiProbe_mut_1924	CGTCCTAGTGATTGTTCGGTGGGTGCCATGAGGAAG	68.8708	80.9253	63.1718	63.047
MitomiProbe_mut_1925	CGTCCTAGTGATTGTTCTGTGGGTGCCATGAGGAAG	72.0251	80.1159	76.2262	52.9537
MitomiProbe_mut_1926	CGTCCTAGTGATTGTTGAGTGGGTGCCATGAGGAAG	92.6852	81.4316	82.8126	67.2724
MitomiProbe_mut_1927	CGTCCTAGTGATTGTTGCGTGGGTGCCATGAGGAAG	80.1455	89.4315	71.2574	56.6765
MitomiProbe_mut_1928	CGTCCTAGTGATTGTTGGGTGGGTGCCATGAGGAAG	99.6814	73.2677	71.9974	62.6796
MitomiProbe_mut_1929	CGTCCTAGTGATTGTTGTGTGGGTGCCATGAGGAAG	90.4451	85.7851	72.1822	50.2979
MitomiProbe_mut_193	AAAGCGGTAATTTGGTCCGTGGGTGCAGATATCTAT	82.8834	89.119	74.1997	54.4043
MitomiProbe_mut_1930	CGTCCTAGTGATTGTTTAGTGGGTGCCATGAGGAAG	99.6727	102.238	75.3735	60.2
MitomiProbe_mut_1931	CGTCCTAGTGATTGTTTCGTGGGTGCCATGAGGAAG	90.312	89	66.0404	69.6628
MitomiProbe_mut_1932	CGTCCTAGTGATTGTTTGGTGGGTGCCATGAGGAAG	89.7878	82.821	79.5165	65.7177
MitomiProbe_mut_1933	CGTCCTAGTGATTGTTTTGTGGGTGCCATGAGGAAG	92.7384	117.748	88.2826	71.2088
MitomiProbe_mut_1934	CGTCCTAGTGATTTACACGTGTTTTCCATGAGGAAG	1340.61	817.352	338.993	122.662
MitomiProbe_mut_1935	CGTCCTAGTGATTTGCACGTGTTTTCCATGAGGAAG	1941.44	1133.49	334.591	148.375
MitomiProbe_mut_1936	CGTCCTAGTGATTTTCACGTGAAATCCATGAGGAAG	664.601	731.847	464.062	408.405
MitomiProbe_mut_1937	CGTCCTAGTGATTTTCACGTGAACTCCATGAGGAAG	969.368	801.429	767.06	489.056
MitomiProbe_mut_1938	CGTCCTAGTGATTTTCACGTGAAGTCCATGAGGAAG	786.946	778.657	618.79	381.463
MitomiProbe_mut_1939	CGTCCTAGTGATTTTCACGTGAATTCCATGAGGAAG	979.977	591.734	743.59	297.527
MitomiProbe_mut_194	AAAGCGGTAATTTGGTCGGTGGGTGCAGATATCTAT	67.29	57.4781	71.5733	70.9579
MitomiProbe_mut_1940	CGTCCTAGTGATTTTCACGTGACATCCATGAGGAAG	6802.06	5032.6	6063.04	2378.71
MitomiProbe_mut_1941	CGTCCTAGTGATTTTCACGTGACCTCCATGAGGAAG	8736.19	7264.45	8225.63	5759.93
MitomiProbe_mut_1942	CGTCCTAGTGATTTTCACGTGACGTCCATGAGGAAG	4443.9	4087.49	5865.99	3171.15
MitomiProbe_mut_1943	CGTCCTAGTGATTTTCACGTGACTTCCATGAGGAAG	5657.65	8384.27	7437.39	7766.26
MitomiProbe_mut_1944	CGTCCTAGTGATTTTCACGTGAGATCCATGAGGAAG	1004.86	912.044	738.507	364.875
MitomiProbe_mut_1945	CGTCCTAGTGATTTTCACGTGAGCTCCATGAGGAAG	1242.9	1112.54	779.419	443.418
MitomiProbe_mut_1946	CGTCCTAGTGATTTTCACGTGAGGTCCATGAGGAAG	958.687	989.441	585.06	306.961
MitomiProbe_mut_1947	CGTCCTAGTGATTTTCACGTGAGTTCCATGAGGAAG	994.045	1112.87	524.313	402
MitomiProbe_mut_1948	CGTCCTAGTGATTTTCACGTGATATCCATGAGGAAG	3674.81	4718.48	3525.6	1627.52
MitomiProbe_mut_1949	CGTCCTAGTGATTTTCACGTGATCTCCATGAGGAAG	5857.84	6503.23	6832.19	5529.86
MitomiProbe_mut_195	AAAGCGGTAATTTGGTCTGTGGGTGCAGATATCTAT	60.0006	91.6807	76.7846	56.5809
MitomiProbe_mut_1950	CGTCCTAGTGATTTTCACGTGATGTCCATGAGGAAG	3327.53	3772.39	3550.98	2468.34
MitomiProbe_mut_1951	CGTCCTAGTGATTTTCACGTGATTTCCATGAGGAAG	4793.2	4619.06	3734.77	2343.03
MitomiProbe_mut_1952	CGTCCTAGTGATTTTCACGTGCAATCCATGAGGAAG	883.212	796.341	412.887	171.968
MitomiProbe_mut_1953	CGTCCTAGTGATTTTCACGTGCACTCCATGAGGAAG	1279.18	939.131	412.459	171.656
MitomiProbe_mut_1954	CGTCCTAGTGATTTTCACGTGCAGTCCATGAGGAAG	1135.94	679.002	377.801	161.741
MitomiProbe_mut_1955	CGTCCTAGTGATTTTCACGTGCATTCCATGAGGAAG	1315.14	716.778	399.365	177.458
MitomiProbe_mut_1956	CGTCCTAGTGATTTTCACGTGCCATCCATGAGGAAG	1339.89	847.527	356.212	123.522
MitomiProbe_mut_1957	CGTCCTAGTGATTTTCACGTGCCCTCCATGAGGAAG	1153	781.785	398.656	137.37
MitomiProbe_mut_1958	CGTCCTAGTGATTTTCACGTGCCGTCCATGAGGAAG	1195.12	900.198	346.265	148.486
MitomiProbe_mut_1959	CGTCCTAGTGATTTTCACGTGCCTTCCATGAGGAAG	1538.58	886.968	413.109	161.213
MitomiProbe_mut_196	AAAGCGGTAATTTGGTGAGTGGGTGCAGATATCTAT	84.738	95.4315	81.6381	45.2211
MitomiProbe_mut_1960	CGTCCTAGTGATTTTCACGTGCGATCCATGAGGAAG	777.503	632.194	292.563	141.108
MitomiProbe_mut_1961	CGTCCTAGTGATTTTCACGTGCGCTCCATGAGGAAG	966.226	660.751	316.012	120.4
MitomiProbe_mut_1962	CGTCCTAGTGATTTTCACGTGCGGTCCATGAGGAAG	804.173	525.566	310.293	102.468
MitomiProbe_mut_1963	CGTCCTAGTGATTTTCACGTGCGTTCCATGAGGAAG	870.532	603.893	243.388	128.767
MitomiProbe_mut_1964	CGTCCTAGTGATTTTCACGTGCTATCCATGAGGAAG	1382.61	925.595	421.727	177.699
MitomiProbe_mut_1965	CGTCCTAGTGATTTTCACGTGCTCTCCATGAGGAAG	1407.62	979.579	490.195	170.52
MitomiProbe_mut_1966	CGTCCTAGTGATTTTCACGTGCTGTCCATGAGGAAG	1088.44	782.245	401.41	147.86
MitomiProbe_mut_1967	CGTCCTAGTGATTTTCACGTGCTTTCCATGAGGAAG	1633.28	950.115	471.418	171.655
MitomiProbe_mut_1968	CGTCCTAGTGATTTTCACGTGGAATCCATGAGGAAG	566.084	390.949	270.459	128.056
MitomiProbe_mut_1969	CGTCCTAGTGATTTTCACGTGGACTCCATGAGGAAG	679.292	522.76	272.856	124.522
MitomiProbe_mut_197	AAAGCGGTAATTTGGTGCGTGGGTGCAGATATCTAT	72.0775	77.2531	82.2828	61.2422
MitomiProbe_mut_1970	CGTCCTAGTGATTTTCACGTGGAGTCCATGAGGAAG	472.342	429.228	249.634	110.107
MitomiProbe_mut_1971	CGTCCTAGTGATTTTCACGTGGATTCCATGAGGAAG	618.844	486.773	297.137	143.585
MitomiProbe_mut_1972	CGTCCTAGTGATTTTCACGTGGCATCCATGAGGAAG	640.134	621.277	236.895	115.22
MitomiProbe_mut_1973	CGTCCTAGTGATTTTCACGTGGCCTCCATGAGGAAG	905.76	613.317	351.902	115.407
MitomiProbe_mut_1974	CGTCCTAGTGATTTTCACGTGGCGTCCATGAGGAAG	815.487	542.967	255.613	102.148
MitomiProbe_mut_1975	CGTCCTAGTGATTTTCACGTGGCTTCCATGAGGAAG	783.436	603.761	267.568	141.505
MitomiProbe_mut_1976	CGTCCTAGTGATTTTCACGTGGGATCCATGAGGAAG	636.722	348.334	233.922	97.577
MitomiProbe_mut_1977	CGTCCTAGTGATTTTCACGTGGGCTCCATGAGGAAG	876.352	399.786	226.218	101.112
MitomiProbe_mut_1978	CGTCCTAGTGATTTTCACGTGGGGTCCATGAGGAAG	685.744	444.898	209.645	105.268
MitomiProbe_mut_1979	CGTCCTAGTGATTTTCACGTGGGTTCCATGAGGAAG	809.635	445.277	238.955	93.4387
MitomiProbe_mut_198	AAAGCGGTAATTTGGTGGGTGGGTGCAGATATCTAT	83.2112	79.5306	63.053	64.9224
MitomiProbe_mut_1980	CGTCCTAGTGATTTTCACGTGGTATCCATGAGGAAG	1021.38	742.254	386.689	136.757
MitomiProbe_mut_1981	CGTCCTAGTGATTTTCACGTGGTCTCCATGAGGAAG	1578.81	965.815	518.949	157.074
MitomiProbe_mut_1982	CGTCCTAGTGATTTTCACGTGGTGTCCATGAGGAAG	905.332	844.918	281.939	129.173
MitomiProbe_mut_1983	CGTCCTAGTGATTTTCACGTGGTTTCCATGAGGAAG	920.694	944.533	468.036	184.691
MitomiProbe_mut_1984	CGTCCTAGTGATTTTCACGTGTAATCCATGAGGAAG	859.43	686.157	487.783	172.846
MitomiProbe_mut_1985	CGTCCTAGTGATTTTCACGTGTACTCCATGAGGAAG	934.584	709.041	398.085	166.41
MitomiProbe_mut_1986	CGTCCTAGTGATTTTCACGTGTAGTCCATGAGGAAG	747.089	537.388	358.119	135.108
MitomiProbe_mut_1987	CGTCCTAGTGATTTTCACGTGTATTCCATGAGGAAG	992.973	731.619	414.995	155.76
MitomiProbe_mut_1988	CGTCCTAGTGATTTTCACGTGTCATCCATGAGGAAG	972.045	895.938	395.942	179.916
MitomiProbe_mut_1989	CGTCCTAGTGATTTTCACGTGTCCTCCATGAGGAAG	1196.33	692.012	466.944	170.443
MitomiProbe_mut_199	AAAGCGGTAATTTGGTGTGTGGGTGCAGATATCTAT	89.7429	88.571	76.2688	69.464
MitomiProbe_mut_1990	CGTCCTAGTGATTTTCACGTGTCGTCCATGAGGAAG	835.846	662.309	402.698	148.279
MitomiProbe_mut_1991	CGTCCTAGTGATTTTCACGTGTCTTCCATGAGGAAG	1043.76	681.456	443.805	128.856
MitomiProbe_mut_1992	CGTCCTAGTGATTTTCACGTGTGATCCATGAGGAAG	735.387	619.957	340.666	135.115
MitomiProbe_mut_1993	CGTCCTAGTGATTTTCACGTGTGCTCCATGAGGAAG	718.269	422.046	309.204	130.17
MitomiProbe_mut_1994	CGTCCTAGTGATTTTCACGTGTGGTCCATGAGGAAG	627.301	507.687	309.174	113.54
MitomiProbe_mut_1995	CGTCCTAGTGATTTTCACGTGTGTTCCATGAGGAAG	570.27	553.407	273.992	151.011
MitomiProbe_mut_1996	CGTCCTAGTGATTTTCACGTGTTATCCATGAGGAAG	1180.95	709.18	409.348	161.864
MitomiProbe_mut_1997	CGTCCTAGTGATTTTCACGTGTTCTCCATGAGGAAG	1409.93	1000.03	537.909	185.141
MitomiProbe_mut_1998	CGTCCTAGTGATTTTCACGTGTTGTCCATGAGGAAG	1075.05	732.414	409.061	169.966
MitomiProbe_mut_1999	CGTCCTAGTGATTTTCACGTGTTTTCCATGAGGAAG	1045.42	914.525	429.473	189.332
MitomiProbe_mut_2	AAAGCGGTAATTTACCACGTGTTTTCACATATCTAT	1805.61	737.239	245.819	86.7216
MitomiProbe_mut_20	AAAGCGGTAATTTGAAGTGTGGGTGCAGATATCTAT	79.8108	82.3156	76.3064	60.5169
MitomiProbe_mut_200	AAAGCGGTAATTTGGTTAGTGGGTGCAGATATCTAT	84.7196	72.1753	69.2382	61.1811
MitomiProbe_mut_2000	CGTCCTAGTGATTTTCACGTGTTTTCCATGAGGAAG	1158.22	841.709	470.189	166.482
MitomiProbe_mut_2001	CTAACGAAGGTTTAACACGTGTTTTACAAGCCAAGT	1668.87	1177.46	325.395	119.867
MitomiProbe_mut_2002	CTAACGAAGGTTTACCACGTGTTTTACAAGCCAAGT	1109.55	735.412	205	92.1116
MitomiProbe_mut_2003	CTAACGAAGGTTTAGCACGTGTTTTACAAGCCAAGT	2207.88	1261.7	240.542	93.5444
MitomiProbe_mut_2004	CTAACGAAGGTTTATCACGTGTTTTACAAGCCAAGT	4457.6	2942.02	1669.47	429.163
MitomiProbe_mut_2005	CTAACGAAGGTTTCACACGTGTTTTACAAGCCAAGT	1174.22	506.069	222.802	82.8836
MitomiProbe_mut_2006	CTAACGAAGGTTTCCCACGTGTTTTACAAGCCAAGT	831.521	393.866	143.809	90.7583
MitomiProbe_mut_2007	CTAACGAAGGTTTCGCACGTGTTTTACAAGCCAAGT	1474.87	656.21	194.486	91.9745
MitomiProbe_mut_2008	CTAACGAAGGTTTCTCACGTGTTTTACAAGCCAAGT	1519.35	1104.12	480.184	160.011
MitomiProbe_mut_2009	CTAACGAAGGTTTGAAAAGTGGGTGACAAGCCAAGT	72.7393	65.4607	74.8627	63.4297
MitomiProbe_mut_201	AAAGCGGTAATTTGGTTCGTGGGTGCAGATATCTAT	77.0358	84.967	84.9643	64.3771
MitomiProbe_mut_2010	CTAACGAAGGTTTGAAACGTGGGTGACAAGCCAAGT	70.0401	68.3312	71.1026	55.8923
MitomiProbe_mut_2011	CTAACGAAGGTTTGAAAGGTGGGTGACAAGCCAAGT	63.2211	59.8366	62.9894	60.9231
MitomiProbe_mut_2012	CTAACGAAGGTTTGAAATGTGGGTGACAAGCCAAGT	79.3722	89.0638	80.4092	76.2598
MitomiProbe_mut_2013	CTAACGAAGGTTTGAACAGTGGGTGACAAGCCAAGT	65.6517	65.9446	60.9533	59.9138
MitomiProbe_mut_2014	CTAACGAAGGTTTGAACCGTGGGTGACAAGCCAAGT	59.2025	72.1843	53.1264	48.8485
MitomiProbe_mut_2015	CTAACGAAGGTTTGAACGGTGGGTGACAAGCCAAGT	61.929	73.4374	51.0265	46.5662
MitomiProbe_mut_2016	CTAACGAAGGTTTGAACTGTGGGTGACAAGCCAAGT	64.2486	71.2784	68.8055	56.5459
MitomiProbe_mut_2017	CTAACGAAGGTTTGAAGAGTGGGTGACAAGCCAAGT	67.6651	63.0603	64.296	55.8922
MitomiProbe_mut_2018	CTAACGAAGGTTTGAAGCGTGGGTGACAAGCCAAGT	63.4477	61.1255	62.0467	42.9188
MitomiProbe_mut_2019	CTAACGAAGGTTTGAAGGGTGGGTGACAAGCCAAGT	70.8531	74.3848	65.0399	48.0046
MitomiProbe_mut_202	AAAGCGGTAATTTGGTTGGTGGGTGCAGATATCTAT	78.1823	65.048	67.9894	64.464
MitomiProbe_mut_2020	CTAACGAAGGTTTGAAGTGTGGGTGACAAGCCAAGT	64.4306	59.7153	62.1428	50.1386
MitomiProbe_mut_2021	CTAACGAAGGTTTGAATAGTGGGTGACAAGCCAAGT	76.7291	82.8501	72.0606	61.0882
MitomiProbe_mut_2022	CTAACGAAGGTTTGAATCGTGGGTGACAAGCCAAGT	73.5583	56.742	62.4972	51.4797
MitomiProbe_mut_2023	CTAACGAAGGTTTGAATGGTGGGTGACAAGCCAAGT	73.4844	65.3678	78.3755	53.4552
MitomiProbe_mut_2024	CTAACGAAGGTTTGAATTGTGGGTGACAAGCCAAGT	75.636	78.5378	75.8421	66.0731
MitomiProbe_mut_2025	CTAACGAAGGTTTGACAAGTGGGTGACAAGCCAAGT	62.0105	86.6267	59.0526	59.9547
MitomiProbe_mut_2026	CTAACGAAGGTTTGACACGTGGGTGACAAGCCAAGT	935.594	378.519	132.774	59.7541
MitomiProbe_mut_2027	CTAACGAAGGTTTGACACGTGTTTTACAAGCCAAGT	1585.78	916.792	262.09	89.0049
MitomiProbe_mut_2028	CTAACGAAGGTTTGACAGGTGGGTGACAAGCCAAGT	70.3115	61.2214	66.6497	48.4619
MitomiProbe_mut_2029	CTAACGAAGGTTTGACATGTGGGTGACAAGCCAAGT	102.058	88.9724	82.9877	52.8852
MitomiProbe_mut_203	AAAGCGGTAATTTGGTTTGTGGGTGCAGATATCTAT	93.9829	80.8447	67.3521	77.1648
MitomiProbe_mut_2030	CTAACGAAGGTTTGACCAGTGGGTGACAAGCCAAGT	63.8934	57.1464	66.1748	62.3928
MitomiProbe_mut_2031	CTAACGAAGGTTTGACCCGTGGGTGACAAGCCAAGT	71.8034	73.8936	57.0943	46.0606
MitomiProbe_mut_2032	CTAACGAAGGTTTGACCGGTGGGTGACAAGCCAAGT	67.074	55.7163	55.2085	50.6891
MitomiProbe_mut_2033	CTAACGAAGGTTTGACCTGTGGGTGACAAGCCAAGT	73.2596	65.8171	50.6431	43.275
MitomiProbe_mut_2034	CTAACGAAGGTTTGACGAGTGGGTGACAAGCCAAGT	55.1571	63.5793	67.4074	54.4634
MitomiProbe_mut_2035	CTAACGAAGGTTTGACGCGTGGGTGACAAGCCAAGT	83.3368	72.4041	72.4684	55.0725
MitomiProbe_mut_2036	CTAACGAAGGTTTGACGGGTGGGTGACAAGCCAAGT	72.6495	63.4115	66.129	47.0704
MitomiProbe_mut_2037	CTAACGAAGGTTTGACGTGTGGGTGACAAGCCAAGT	72.4041	82.3515	75.9706	55.3336
MitomiProbe_mut_2038	CTAACGAAGGTTTGACTAGTGGGTGACAAGCCAAGT	66.1768	71.3037	62.9545	54.7775
MitomiProbe_mut_2039	CTAACGAAGGTTTGACTCGTGGGTGACAAGCCAAGT	81.5001	91.5636	78.0795	49.3933
MitomiProbe_mut_204	AAAGCGGTAATTTGTAAAGTGGGTGCAGATATCTAT	69.5466	80.8589	78.8392	69.68
MitomiProbe_mut_2040	CTAACGAAGGTTTGACTGGTGGGTGACAAGCCAAGT	78.8383	53.268	60.084	55.8604
MitomiProbe_mut_2041	CTAACGAAGGTTTGACTTGTGGGTGACAAGCCAAGT	82.0575	65.9454	59.5438	49.8721
MitomiProbe_mut_2042	CTAACGAAGGTTTGAGAAGTGGGTGACAAGCCAAGT	65.7378	62.0067	61.7597	59.5264
MitomiProbe_mut_2043	CTAACGAAGGTTTGAGACGTGGGTGACAAGCCAAGT	65.2131	61.0392	63.9787	52.0293
MitomiProbe_mut_2044	CTAACGAAGGTTTGAGAGGTGGGTGACAAGCCAAGT	55.8265	58.4289	54.1296	59.3317
MitomiProbe_mut_2045	CTAACGAAGGTTTGAGATGTGGGTGACAAGCCAAGT	61.6176	63.9895	69.0975	59.6266
MitomiProbe_mut_2046	CTAACGAAGGTTTGAGCAGTGGGTGACAAGCCAAGT	79.4792	74.0345	61.7278	63.2966
MitomiProbe_mut_2047	CTAACGAAGGTTTGAGCCGTGGGTGACAAGCCAAGT	59.886	48.5804	54.6591	45.9022
MitomiProbe_mut_2048	CTAACGAAGGTTTGAGCGGTGGGTGACAAGCCAAGT	55.1073	62.324	57.7967	44.0102
MitomiProbe_mut_2049	CTAACGAAGGTTTGAGCTGTGGGTGACAAGCCAAGT	68.3074	84.0724	69.9412	60.1691
MitomiProbe_mut_205	AAAGCGGTAATTTGTAACGTGGGTGCAGATATCTAT	99.6556	98.802	88.4563	75.7376
MitomiProbe_mut_2050	CTAACGAAGGTTTGAGGAGTGGGTGACAAGCCAAGT	60.659	54.576	69.4455	51.2174
MitomiProbe_mut_2051	CTAACGAAGGTTTGAGGCGTGGGTGACAAGCCAAGT	64.4986	70.0238	56.1602	47.2887
MitomiProbe_mut_2052	CTAACGAAGGTTTGAGGGGTGGGTGACAAGCCAAGT	68.8826	62.7385	64.1357	60.5875
MitomiProbe_mut_2053	CTAACGAAGGTTTGAGGTGTGGGTGACAAGCCAAGT	64.7497	71.2283	59.8721	59.689
MitomiProbe_mut_2054	CTAACGAAGGTTTGAGTAGTGGGTGACAAGCCAAGT	62.5804	66.6688	59.6452	57.2984
MitomiProbe_mut_2055	CTAACGAAGGTTTGAGTCGTGGGTGACAAGCCAAGT	69.4474	71.1692	57.5371	46.4733
MitomiProbe_mut_2056	CTAACGAAGGTTTGAGTGGTGGGTGACAAGCCAAGT	74.8256	75.1723	62.8069	50.6917
MitomiProbe_mut_2057	CTAACGAAGGTTTGAGTTGTGGGTGACAAGCCAAGT	71.7297	66.8489	68.0562	55.1765
MitomiProbe_mut_2058	CTAACGAAGGTTTGATAAGTGGGTGACAAGCCAAGT	64.328	66.5253	68.8388	61.9321
MitomiProbe_mut_2059	CTAACGAAGGTTTGATACGTGGGTGACAAGCCAAGT	76.5257	88.4221	71.3802	50.8083
MitomiProbe_mut_206	AAAGCGGTAATTTGTAAGGTGGGTGCAGATATCTAT	78.1436	76.326	61.8943	71.1633
MitomiProbe_mut_2060	CTAACGAAGGTTTGATAGGTGGGTGACAAGCCAAGT	65.8069	68.4027	68.9455	56.8641
MitomiProbe_mut_2061	CTAACGAAGGTTTGATATGTGGGTGACAAGCCAAGT	74.3067	77.8675	69.3919	62.336
MitomiProbe_mut_2062	CTAACGAAGGTTTGATCAGTGGGTGACAAGCCAAGT	64.5691	69.2926	70.26	61.1586
MitomiProbe_mut_2063	CTAACGAAGGTTTGATCCGTGGGTGACAAGCCAAGT	59.7373	63.1559	59.2568	56.094
MitomiProbe_mut_2064	CTAACGAAGGTTTGATCGGTGGGTGACAAGCCAAGT	65.125	68.0059	65.9985	51.8335
MitomiProbe_mut_2065	CTAACGAAGGTTTGATCTGTGGGTGACAAGCCAAGT	68.9611	74.2659	69.5125	61.8324
MitomiProbe_mut_2066	CTAACGAAGGTTTGATGAGTGGGTGACAAGCCAAGT	64.5928	76.2629	59.8152	52.2373
MitomiProbe_mut_2067	CTAACGAAGGTTTGATGCGTGGGTGACAAGCCAAGT	68.412	77.7295	69.1077	45.4484
MitomiProbe_mut_2068	CTAACGAAGGTTTGATGGGTGGGTGACAAGCCAAGT	84.6283	80.6244	66.7759	68.9072
MitomiProbe_mut_2069	CTAACGAAGGTTTGATGTGTGGGTGACAAGCCAAGT	75.3938	81.9652	58.9134	58.8444
MitomiProbe_mut_207	AAAGCGGTAATTTGTAATGTGGGTGCAGATATCTAT	77.2107	81.965	80.0798	84.1562
MitomiProbe_mut_2070	CTAACGAAGGTTTGATTAGTGGGTGACAAGCCAAGT	71.797	73.608	68.1162	70.3527
MitomiProbe_mut_2071	CTAACGAAGGTTTGATTCGTGGGTGACAAGCCAAGT	68.0355	63.4333	59.9996	51.991
MitomiProbe_mut_2072	CTAACGAAGGTTTGATTGGTGGGTGACAAGCCAAGT	94.1377	67.1336	65.5904	62.0728
MitomiProbe_mut_2073	CTAACGAAGGTTTGATTTGTGGGTGACAAGCCAAGT	70.4139	76.2021	72.4448	63.8635
MitomiProbe_mut_2074	CTAACGAAGGTTTGCAAAGTGGGTGACAAGCCAAGT	71.9604	74.0635	73.4388	61.2024
MitomiProbe_mut_2075	CTAACGAAGGTTTGCAACGTGGGTGACAAGCCAAGT	83.7237	71.2237	78.8278	53.1295
MitomiProbe_mut_2076	CTAACGAAGGTTTGCAAGGTGGGTGACAAGCCAAGT	69.6356	68.8452	60.1539	52.6536
MitomiProbe_mut_2077	CTAACGAAGGTTTGCAATGTGGGTGACAAGCCAAGT	72.8394	68.8382	75.1028	54.5162
MitomiProbe_mut_2078	CTAACGAAGGTTTGCACAGTGGGTGACAAGCCAAGT	63.3043	68.0181	67.9513	50.2953
MitomiProbe_mut_2079	CTAACGAAGGTTTGCACCGTGGGTGACAAGCCAAGT	70.0769	58.4433	69.0333	50.7926
MitomiProbe_mut_208	AAAGCGGTAATTTGTACAGTGGGTGCAGATATCTAT	86.1496	73.3382	84.4893	73.0579
MitomiProbe_mut_2080	CTAACGAAGGTTTGCACGGTGGGTGACAAGCCAAGT	68.7535	63.5073	66.9964	51.1082
MitomiProbe_mut_2081	CTAACGAAGGTTTGCACTGTGGGTGACAAGCCAAGT	75.0567	66.9569	68.3861	58.693
MitomiProbe_mut_2082	CTAACGAAGGTTTGCAGAGTGGGTGACAAGCCAAGT	66.5989	67.9475	73.8	60.6507
MitomiProbe_mut_2083	CTAACGAAGGTTTGCAGCGTGGGTGACAAGCCAAGT	66.3542	75.7069	57.6357	54.6579
MitomiProbe_mut_2084	CTAACGAAGGTTTGCAGGGTGGGTGACAAGCCAAGT	66.1844	62.4559	67.496	48.694
MitomiProbe_mut_2085	CTAACGAAGGTTTGCAGTGTGGGTGACAAGCCAAGT	68.7788	72.3554	60.485	50.8942
MitomiProbe_mut_2086	CTAACGAAGGTTTGCATAGTGGGTGACAAGCCAAGT	67.8288	78.6789	64.7824	64.4897
MitomiProbe_mut_2087	CTAACGAAGGTTTGCATCGTGGGTGACAAGCCAAGT	57.3528	67.592	65.3778	51.6145
MitomiProbe_mut_2088	CTAACGAAGGTTTGCATGGTGGGTGACAAGCCAAGT	67.4615	61.8122	60.1333	62.3028
MitomiProbe_mut_2089	CTAACGAAGGTTTGCATTGTGGGTGACAAGCCAAGT	70.2015	76.6239	71.3301	61.9673
MitomiProbe_mut_209	AAAGCGGTAATTTGTACCGTGGGTGCAGATATCTAT	59.15	87.759	56.3704	58.9472
MitomiProbe_mut_2090	CTAACGAAGGTTTGCCAAGTGGGTGACAAGCCAAGT	73.3225	81.1474	62.5862	59.9529
MitomiProbe_mut_2091	CTAACGAAGGTTTGCCACGTGGGTGACAAGCCAAGT	883.306	404.678	134.614	79.2408
MitomiProbe_mut_2092	CTAACGAAGGTTTGCCACGTGTTTTACAAGCCAAGT	882.7	552.891	160.379	90.0023
MitomiProbe_mut_2093	CTAACGAAGGTTTGCCAGGTGGGTGACAAGCCAAGT	67.2726	76.0603	54.1293	49.9796
MitomiProbe_mut_2094	CTAACGAAGGTTTGCCATGTGGGTGACAAGCCAAGT	96.7961	90.1906	80.3118	73.0486
MitomiProbe_mut_2095	CTAACGAAGGTTTGCCCAGTGGGTGACAAGCCAAGT	56.4121	59.2654	49.5231	42.2532
MitomiProbe_mut_2096	CTAACGAAGGTTTGCCCCGTGGGTGACAAGCCAAGT	77.4315	72.8894	55.7769	53.1746
MitomiProbe_mut_2097	CTAACGAAGGTTTGCCCGGTGGGTGACAAGCCAAGT	58.0292	51.0926	54.9757	42.9763
MitomiProbe_mut_2098	CTAACGAAGGTTTGCCCTGTGGGTGACAAGCCAAGT	61.2806	59.8697	63.5956	51.9956
MitomiProbe_mut_2099	CTAACGAAGGTTTGCCGAGTGGGTGACAAGCCAAGT	61.6068	52.553	57.3201	64.4018
MitomiProbe_mut_21	AAAGCGGTAATTTGAATAGTGGGTGCAGATATCTAT	82.5436	75.6417	82.4049	75.2669
MitomiProbe_mut_210	AAAGCGGTAATTTGTACGGTGGGTGCAGATATCTAT	79.5457	89.1249	68.7692	54.5175
MitomiProbe_mut_2100	CTAACGAAGGTTTGCCGCGTGGGTGACAAGCCAAGT	63.6578	79.7563	71.8791	55.2072
MitomiProbe_mut_2101	CTAACGAAGGTTTGCCGGGTGGGTGACAAGCCAAGT	53.999	62.2814	62.8205	47.5477
MitomiProbe_mut_2102	CTAACGAAGGTTTGCCGTGTGGGTGACAAGCCAAGT	66.2918	66.4006	77.7077	54.385
MitomiProbe_mut_2103	CTAACGAAGGTTTGCCTAGTGGGTGACAAGCCAAGT	75.53	60.3744	64.8702	50.4032
MitomiProbe_mut_2104	CTAACGAAGGTTTGCCTCGTGGGTGACAAGCCAAGT	88.64	83.3641	67.883	59.8394
MitomiProbe_mut_2105	CTAACGAAGGTTTGCCTGGTGGGTGACAAGCCAAGT	65.4553	65.4673	58.7667	51.6828
MitomiProbe_mut_2106	CTAACGAAGGTTTGCCTTGTGGGTGACAAGCCAAGT	79.0083	69.4626	59.384	51.8177
MitomiProbe_mut_2107	CTAACGAAGGTTTGCGAAGTGGGTGACAAGCCAAGT	65.3291	63.7158	56.4245	64.5852
MitomiProbe_mut_2108	CTAACGAAGGTTTGCGACGTGGGTGACAAGCCAAGT	75.0658	65.92	72.3555	57.2122
MitomiProbe_mut_2109	CTAACGAAGGTTTGCGAGGTGGGTGACAAGCCAAGT	71.7315	73.1363	69.2416	49.1098
MitomiProbe_mut_211	AAAGCGGTAATTTGTACTGTGGGTGCAGATATCTAT	79.0919	84.995	71.4557	69.9014
MitomiProbe_mut_2110	CTAACGAAGGTTTGCGATGTGGGTGACAAGCCAAGT	71.7393	72.3698	66.5876	51.5857
MitomiProbe_mut_2111	CTAACGAAGGTTTGCGCAGTGGGTGACAAGCCAAGT	77.886	63.6491	66.1467	59.0113
MitomiProbe_mut_2112	CTAACGAAGGTTTGCGCCGTGGGTGACAAGCCAAGT	73.5385	65.1501	60.5589	52.3134
MitomiProbe_mut_2113	CTAACGAAGGTTTGCGCGGTGGGTGACAAGCCAAGT	59.6038	71.8739	62.4054	54.6056
MitomiProbe_mut_2114	CTAACGAAGGTTTGCGCTGTGGGTGACAAGCCAAGT	66.2152	50.768	56.2063	52.801
MitomiProbe_mut_2115	CTAACGAAGGTTTGCGGAGTGGGTGACAAGCCAAGT	67.8456	70.8618	63.5537	66.2632
MitomiProbe_mut_2116	CTAACGAAGGTTTGCGGCGTGGGTGACAAGCCAAGT	58.0983	74.5318	63.1047	51.5912
MitomiProbe_mut_2117	CTAACGAAGGTTTGCGGGGTGGGTGACAAGCCAAGT	73.2571	71.6791	64.6629	57.8904
MitomiProbe_mut_2118	CTAACGAAGGTTTGCGGTGTGGGTGACAAGCCAAGT	67.4958	64.4429	76.7828	51.9747
MitomiProbe_mut_2119	CTAACGAAGGTTTGCGTAGTGGGTGACAAGCCAAGT	75.9027	65.0657	60.9216	62.0611
MitomiProbe_mut_212	AAAGCGGTAATTTGTAGAGTGGGTGCAGATATCTAT	88.1008	55.5463	61.984	65.0145
MitomiProbe_mut_2120	CTAACGAAGGTTTGCGTCGTGGGTGACAAGCCAAGT	75.6058	65.9276	58.3625	50.25
MitomiProbe_mut_2121	CTAACGAAGGTTTGCGTGGTGGGTGACAAGCCAAGT	66.7836	68.8307	69.9329	49.9868
MitomiProbe_mut_2122	CTAACGAAGGTTTGCGTTGTGGGTGACAAGCCAAGT	75.6505	75.2225	70.0786	50.5721
MitomiProbe_mut_2123	CTAACGAAGGTTTGCTAAGTGGGTGACAAGCCAAGT	72.1255	70.2389	77.0978	57.6717
MitomiProbe_mut_2124	CTAACGAAGGTTTGCTACGTGGGTGACAAGCCAAGT	66.905	65.0146	74.3857	48.4052
MitomiProbe_mut_2125	CTAACGAAGGTTTGCTAGGTGGGTGACAAGCCAAGT	62.4399	75.3069	63.7099	62.1212
MitomiProbe_mut_2126	CTAACGAAGGTTTGCTATGTGGGTGACAAGCCAAGT	76.1114	70.2678	73.4985	56.8125
MitomiProbe_mut_2127	CTAACGAAGGTTTGCTCAGTGGGTGACAAGCCAAGT	70.5934	56.7451	57.3985	62.825
MitomiProbe_mut_2128	CTAACGAAGGTTTGCTCCGTGGGTGACAAGCCAAGT	72.3477	64.2705	62.5389	52.8385
MitomiProbe_mut_2129	CTAACGAAGGTTTGCTCGGTGGGTGACAAGCCAAGT	78.5242	61.1625	65.3066	60.3219
MitomiProbe_mut_213	AAAGCGGTAATTTGTAGCGTGGGTGCAGATATCTAT	85.8363	87.8496	74.1174	63.3183
MitomiProbe_mut_2130	CTAACGAAGGTTTGCTCTGTGGGTGACAAGCCAAGT	69.3117	69.7553	73.3416	59.4066
MitomiProbe_mut_2131	CTAACGAAGGTTTGCTGAGTGGGTGACAAGCCAAGT	62.1916	73.253	58.6602	50.3364
MitomiProbe_mut_2132	CTAACGAAGGTTTGCTGCGTGGGTGACAAGCCAAGT	68.6686	75.2215	69.3526	52.247
MitomiProbe_mut_2133	CTAACGAAGGTTTGCTGGGTGGGTGACAAGCCAAGT	75.0366	60.4114	55.0181	49.7266
MitomiProbe_mut_2134	CTAACGAAGGTTTGCTGTGTGGGTGACAAGCCAAGT	73.8111	79.5859	67.8289	46.8857
MitomiProbe_mut_2135	CTAACGAAGGTTTGCTTAGTGGGTGACAAGCCAAGT	73.8696	73.3081	72.0695	60.5147
MitomiProbe_mut_2136	CTAACGAAGGTTTGCTTCGTGGGTGACAAGCCAAGT	70.9917	71.8468	59.3479	51.7236
MitomiProbe_mut_2137	CTAACGAAGGTTTGCTTGGTGGGTGACAAGCCAAGT	63.7735	79.2567	62.8904	51.3377
MitomiProbe_mut_2138	CTAACGAAGGTTTGCTTTGTGGGTGACAAGCCAAGT	74.9663	76.4475	56.6445	57.5039
MitomiProbe_mut_2139	CTAACGAAGGTTTGGAAAGTGGGTGACAAGCCAAGT	62.2548	73.9257	69.4708	65.006
MitomiProbe_mut_214	AAAGCGGTAATTTGTAGGGTGGGTGCAGATATCTAT	75.1765	82.6864	60.7713	51.1224
MitomiProbe_mut_2140	CTAACGAAGGTTTGGAACGTGGGTGACAAGCCAAGT	81.0859	73.5251	84.1948	62.2224
MitomiProbe_mut_2141	CTAACGAAGGTTTGGAAGGTGGGTGACAAGCCAAGT	55.8818	62.4424	63.7105	45.3783
MitomiProbe_mut_2142	CTAACGAAGGTTTGGAATGTGGGTGACAAGCCAAGT	74.667	62.2147	70.0371	55.6186
MitomiProbe_mut_2143	CTAACGAAGGTTTGGACAGTGGGTGACAAGCCAAGT	61.751	61.9086	66.0641	50.8343
MitomiProbe_mut_2144	CTAACGAAGGTTTGGACCGTGGGTGACAAGCCAAGT	64.0125	63.7779	49.9053	46.8874
MitomiProbe_mut_2145	CTAACGAAGGTTTGGACGGTGGGTGACAAGCCAAGT	71.91	64.5274	66.0465	51.4052
MitomiProbe_mut_2146	CTAACGAAGGTTTGGACTGTGGGTGACAAGCCAAGT	62.5686	50.5066	50.7519	53.0207
MitomiProbe_mut_2147	CTAACGAAGGTTTGGAGAGTGGGTGACAAGCCAAGT	56.877	64.0674	53.0842	52.1658
MitomiProbe_mut_2148	CTAACGAAGGTTTGGAGCGTGGGTGACAAGCCAAGT	52.1567	57.3687	76.4321	43.3698
MitomiProbe_mut_2149	CTAACGAAGGTTTGGAGGGTGGGTGACAAGCCAAGT	57.1781	65.9967	58.9637	58.6955
MitomiProbe_mut_215	AAAGCGGTAATTTGTAGTGTGGGTGCAGATATCTAT	83.7483	78.387	84.4811	80.9085
MitomiProbe_mut_2150	CTAACGAAGGTTTGGAGTGTGGGTGACAAGCCAAGT	69.7027	78.8651	55.9753	52.4113
MitomiProbe_mut_2151	CTAACGAAGGTTTGGATAGTGGGTGACAAGCCAAGT	79.0057	60.2645	60.9186	49.1799
MitomiProbe_mut_2152	CTAACGAAGGTTTGGATCGTGGGTGACAAGCCAAGT	73.9164	67.185	59.7893	58.9663
MitomiProbe_mut_2153	CTAACGAAGGTTTGGATGGTGGGTGACAAGCCAAGT	61.4774	75.4831	59.1293	48.1278
MitomiProbe_mut_2154	CTAACGAAGGTTTGGATTGTGGGTGACAAGCCAAGT	78.6992	67.7236	75.0725	60.4186
MitomiProbe_mut_2155	CTAACGAAGGTTTGGCAAGTGGGTGACAAGCCAAGT	63.7149	65.8211	63.8415	71.4513
MitomiProbe_mut_2156	CTAACGAAGGTTTGGCACGTGGGTGACAAGCCAAGT	1120.18	413.85	134.217	65.2278
MitomiProbe_mut_2157	CTAACGAAGGTTTGGCACGTGTTTTACAAGCCAAGT	1804.7	1325.2	241.534	89.1919
MitomiProbe_mut_2158	CTAACGAAGGTTTGGCAGGTGGGTGACAAGCCAAGT	71.0494	66.481	64.3048	53.2018
MitomiProbe_mut_2159	CTAACGAAGGTTTGGCATGTGGGTGACAAGCCAAGT	81.591	72.5127	73.5487	55.3033
MitomiProbe_mut_216	AAAGCGGTAATTTGTATAGTGGGTGCAGATATCTAT	96.6102	105.395	87.269	63.6237
MitomiProbe_mut_2160	CTAACGAAGGTTTGGCCAGTGGGTGACAAGCCAAGT	64.68	62.7171	49.4154	60.094
MitomiProbe_mut_2161	CTAACGAAGGTTTGGCCCGTGGGTGACAAGCCAAGT	64.0938	61.0339	57.5952	61.2173
MitomiProbe_mut_2162	CTAACGAAGGTTTGGCCGGTGGGTGACAAGCCAAGT	71.3735	46.7599	52.2004	53.2367
MitomiProbe_mut_2163	CTAACGAAGGTTTGGCCTGTGGGTGACAAGCCAAGT	64.2617	65.8615	63.0235	52.0228
MitomiProbe_mut_2164	CTAACGAAGGTTTGGCGAGTGGGTGACAAGCCAAGT	66.052	58.8791	57.7477	56.3775
MitomiProbe_mut_2165	CTAACGAAGGTTTGGCGCGTGGGTGACAAGCCAAGT	72.1711	68.7825	57.6709	50.6488
MitomiProbe_mut_2166	CTAACGAAGGTTTGGCGGGTGGGTGACAAGCCAAGT	65.0988	70.346	62.1789	57.6687
MitomiProbe_mut_2167	CTAACGAAGGTTTGGCGTGTGGGTGACAAGCCAAGT	62.8014	63.256	58.4173	44.8561
MitomiProbe_mut_2168	CTAACGAAGGTTTGGCTAGTGGGTGACAAGCCAAGT	68.007	70.0175	61.8579	51.9193
MitomiProbe_mut_2169	CTAACGAAGGTTTGGCTCGTGGGTGACAAGCCAAGT	86.8099	66.6592	61.5606	56.0535
MitomiProbe_mut_217	AAAGCGGTAATTTGTATCGTGGGTGCAGATATCTAT	89.266	79.5481	83.0632	60.9597
MitomiProbe_mut_2170	CTAACGAAGGTTTGGCTGGTGGGTGACAAGCCAAGT	45.035	58.4034	52.0643	55.4091
MitomiProbe_mut_2171	CTAACGAAGGTTTGGCTTGTGGGTGACAAGCCAAGT	78.9892	60.3393	63.4413	56.6841
MitomiProbe_mut_2172	CTAACGAAGGTTTGGGAAGTGGGTGACAAGCCAAGT	67.3619	64.7914	58.6588	54.5941
MitomiProbe_mut_2173	CTAACGAAGGTTTGGGACGTGGGTGACAAGCCAAGT	58.8179	64.3505	46.7758	46.4075
MitomiProbe_mut_2174	CTAACGAAGGTTTGGGAGGTGGGTGACAAGCCAAGT	68.1323	65.7097	67.5545	48.0995
MitomiProbe_mut_2175	CTAACGAAGGTTTGGGATGTGGGTGACAAGCCAAGT	76.0448	63.7362	64.7197	50.7889
MitomiProbe_mut_2176	CTAACGAAGGTTTGGGCAGTGGGTGACAAGCCAAGT	70.1705	64.2845	62.8144	55.008
MitomiProbe_mut_2177	CTAACGAAGGTTTGGGCCGTGGGTGACAAGCCAAGT	60.4917	62.7614	55.2656	41.6384
MitomiProbe_mut_2178	CTAACGAAGGTTTGGGCGGTGGGTGACAAGCCAAGT	60.5053	65.5705	64.4286	51.4599
MitomiProbe_mut_2179	CTAACGAAGGTTTGGGCTGTGGGTGACAAGCCAAGT	74.3989	62.7435	55.1335	45.0452
MitomiProbe_mut_218	AAAGCGGTAATTTGTATGGTGGGTGCAGATATCTAT	64.1577	69.5607	72.8247	64.8927
MitomiProbe_mut_2180	CTAACGAAGGTTTGGGGAGTGGGTGACAAGCCAAGT	59.9116	67.6337	59.9231	53.9781
MitomiProbe_mut_2181	CTAACGAAGGTTTGGGGCGTGGGTGACAAGCCAAGT	68.1396	68.3511	62.9361	54.2101
MitomiProbe_mut_2182	CTAACGAAGGTTTGGGGGGTGGGTGACAAGCCAAGT	112.165	103.224	100.787	93.5014
MitomiProbe_mut_2183	CTAACGAAGGTTTGGGGTGTGGGTGACAAGCCAAGT	64.1422	59.1294	60.9571	51.1174
MitomiProbe_mut_2184	CTAACGAAGGTTTGGGTAGTGGGTGACAAGCCAAGT	66.4635	57.6724	71.9452	68.1356
MitomiProbe_mut_2185	CTAACGAAGGTTTGGGTCGTGGGTGACAAGCCAAGT	57.5663	59.2148	58.2909	42.3045
MitomiProbe_mut_2186	CTAACGAAGGTTTGGGTGGTGGGTGACAAGCCAAGT	67.9953	64.9875	64.9123	50.9577
MitomiProbe_mut_2187	CTAACGAAGGTTTGGGTTGTGGGTGACAAGCCAAGT	60.2462	67.8565	59.1233	58.5097
MitomiProbe_mut_2188	CTAACGAAGGTTTGGTAAGTGGGTGACAAGCCAAGT	71.038	76.085	63.2833	58.1174
MitomiProbe_mut_2189	CTAACGAAGGTTTGGTACGTGGGTGACAAGCCAAGT	59.9534	60.1666	74.4308	43.8018
MitomiProbe_mut_219	AAAGCGGTAATTTGTATTGTGGGTGCAGATATCTAT	78.3789	83.8406	87.8032	70.4688
MitomiProbe_mut_2190	CTAACGAAGGTTTGGTAGGTGGGTGACAAGCCAAGT	57.8497	69.1057	71.1641	59.0878
MitomiProbe_mut_2191	CTAACGAAGGTTTGGTATGTGGGTGACAAGCCAAGT	81.2049	68.804	73.2269	65.6877
MitomiProbe_mut_2192	CTAACGAAGGTTTGGTCAGTGGGTGACAAGCCAAGT	71.4955	73.6649	61.908	63.557
MitomiProbe_mut_2193	CTAACGAAGGTTTGGTCCGTGGGTGACAAGCCAAGT	72.0622	67.9805	62.2892	52.1203
MitomiProbe_mut_2194	CTAACGAAGGTTTGGTCGGTGGGTGACAAGCCAAGT	62.2271	58.3125	55.716	51.8387
MitomiProbe_mut_2195	CTAACGAAGGTTTGGTCTGTGGGTGACAAGCCAAGT	63.6452	60.0807	68.1159	62.7518
MitomiProbe_mut_2196	CTAACGAAGGTTTGGTGAGTGGGTGACAAGCCAAGT	77.4539	68.1045	58.3018	54.6864
MitomiProbe_mut_2197	CTAACGAAGGTTTGGTGCGTGGGTGACAAGCCAAGT	70.1332	72.0234	59.532	54.5716
MitomiProbe_mut_2198	CTAACGAAGGTTTGGTGGGTGGGTGACAAGCCAAGT	65.5699	60.9907	62.9576	55.8183
MitomiProbe_mut_2199	CTAACGAAGGTTTGGTGTGTGGGTGACAAGCCAAGT	74.3758	69.1295	60.2741	46.1095
MitomiProbe_mut_22	AAAGCGGTAATTTGAATCGTGGGTGCAGATATCTAT	85.4772	82.7537	73.6812	62.6105
MitomiProbe_mut_220	AAAGCGGTAATTTGTCAAGTGGGTGCAGATATCTAT	94.6492	80.0013	73.1084	66.4018
MitomiProbe_mut_2200	CTAACGAAGGTTTGGTTAGTGGGTGACAAGCCAAGT	80.264	64.6898	60.7446	66.8604
MitomiProbe_mut_2201	CTAACGAAGGTTTGGTTCGTGGGTGACAAGCCAAGT	56.227	60.602	64.804	53.9655
MitomiProbe_mut_2202	CTAACGAAGGTTTGGTTGGTGGGTGACAAGCCAAGT	75.2322	56.2974	77.2078	66.6981
MitomiProbe_mut_2203	CTAACGAAGGTTTGGTTTGTGGGTGACAAGCCAAGT	84.5492	72.2088	65.5121	66.8736
MitomiProbe_mut_2204	CTAACGAAGGTTTGTAAAGTGGGTGACAAGCCAAGT	75.7514	80.8239	73.2187	65.0365
MitomiProbe_mut_2205	CTAACGAAGGTTTGTAACGTGGGTGACAAGCCAAGT	89.0276	74.6881	80.8992	58.9435
MitomiProbe_mut_2206	CTAACGAAGGTTTGTAAGGTGGGTGACAAGCCAAGT	72.4208	73.7213	66.4726	61.8343
MitomiProbe_mut_2207	CTAACGAAGGTTTGTAATGTGGGTGACAAGCCAAGT	73.8214	82.5239	71.9164	62.5207
MitomiProbe_mut_2208	CTAACGAAGGTTTGTACAGTGGGTGACAAGCCAAGT	79.2436	69.6459	69.5727	72.2772
MitomiProbe_mut_2209	CTAACGAAGGTTTGTACCGTGGGTGACAAGCCAAGT	64.4583	61.2763	60.1688	54.0306
MitomiProbe_mut_221	AAAGCGGTAATTTGTCACAAAACTTCACATATCTAT	96.2336	99.1212	101.696	94.7422
MitomiProbe_mut_2210	CTAACGAAGGTTTGTACGGTGGGTGACAAGCCAAGT	65.5376	60.7947	83.3516	52.9244
MitomiProbe_mut_2211	CTAACGAAGGTTTGTACTGTGGGTGACAAGCCAAGT	72.5208	68.1722	63.9893	54.4121
MitomiProbe_mut_2212	CTAACGAAGGTTTGTAGAGTGGGTGACAAGCCAAGT	54.9067	56.9573	73.0982	65.3946
MitomiProbe_mut_2213	CTAACGAAGGTTTGTAGCGTGGGTGACAAGCCAAGT	65.8374	73.9807	58.9185	60.0956
MitomiProbe_mut_2214	CTAACGAAGGTTTGTAGGGTGGGTGACAAGCCAAGT	60.9717	71.6731	55.7179	64.9459
MitomiProbe_mut_2215	CTAACGAAGGTTTGTAGTGTGGGTGACAAGCCAAGT	62.1292	75.4565	74.0517	62.1632
MitomiProbe_mut_2216	CTAACGAAGGTTTGTATAGTGGGTGACAAGCCAAGT	61.26	70.7888	66.3972	74.3168
MitomiProbe_mut_2217	CTAACGAAGGTTTGTATCGTGGGTGACAAGCCAAGT	82.6686	71.0599	60.8914	56.5993
MitomiProbe_mut_2218	CTAACGAAGGTTTGTATGGTGGGTGACAAGCCAAGT	71.5869	70.0784	73.7043	62.7219
MitomiProbe_mut_2219	CTAACGAAGGTTTGTATTGTGGGTGACAAGCCAAGT	70.7891	77.482	74.493	71.5682
MitomiProbe_mut_222	AAAGCGGTAATTTGTCACAACACTTCACATATCTAT	105.116	121.701	116.887	111.905
MitomiProbe_mut_2220	CTAACGAAGGTTTGTCAAGTGGGTGACAAGCCAAGT	70.5018	72.7229	66.237	58.7871
MitomiProbe_mut_2221	CTAACGAAGGTTTGTCACAAAACTTACAAGCCAAGT	77.4423	81.6555	80.4841	70.3703
MitomiProbe_mut_2222	CTAACGAAGGTTTGTCACAACACTTACAAGCCAAGT	94.5	102.505	103.599	73.8312
MitomiProbe_mut_2223	CTAACGAAGGTTTGTCACAAGACTTACAAGCCAAGT	112.48	120.77	106.467	106.083
MitomiProbe_mut_2224	CTAACGAAGGTTTGTCACAATACTTACAAGCCAAGT	94.7251	101.77	81.4621	82.2923
MitomiProbe_mut_2225	CTAACGAAGGTTTGTCACACAACTTACAAGCCAAGT	93.0175	87.6123	81.496	75.6997
MitomiProbe_mut_2226	CTAACGAAGGTTTGTCACACCACTTACAAGCCAAGT	111.896	129.533	110.925	96.7913
MitomiProbe_mut_2227	CTAACGAAGGTTTGTCACACGACTTACAAGCCAAGT	126.032	94.6264	118.977	80.1054
MitomiProbe_mut_2228	CTAACGAAGGTTTGTCACACTACTTACAAGCCAAGT	94.0111	85.3593	82.3722	74.0521
MitomiProbe_mut_2229	CTAACGAAGGTTTGTCACAGAACTTACAAGCCAAGT	67.6732	66.2329	58.5536	60.5986
MitomiProbe_mut_223	AAAGCGGTAATTTGTCACAAGACTTCACATATCTAT	155.838	177.364	192.574	158.878
MitomiProbe_mut_2230	CTAACGAAGGTTTGTCACAGCACTTACAAGCCAAGT	59.5569	69.9126	70.1444	65.741
MitomiProbe_mut_2231	CTAACGAAGGTTTGTCACAGGACTTACAAGCCAAGT	90.7239	84.8515	101.756	82.1504
MitomiProbe_mut_2232	CTAACGAAGGTTTGTCACAGTACTTACAAGCCAAGT	90.9027	87.1825	81.7359	73.0944
MitomiProbe_mut_2233	CTAACGAAGGTTTGTCACATAACTTACAAGCCAAGT	81.4896	80.6576	69.7949	70.0776
MitomiProbe_mut_2234	CTAACGAAGGTTTGTCACATCACTTACAAGCCAAGT	84.0025	82.3601	84.9215	70.1913
MitomiProbe_mut_2235	CTAACGAAGGTTTGTCACATGACTTACAAGCCAAGT	2513.05	2926.95	2570.96	2377.25
MitomiProbe_mut_2236	CTAACGAAGGTTTGTCACATTACTTACAAGCCAAGT	118.413	112.527	100.692	87.0343
MitomiProbe_mut_2237	CTAACGAAGGTTTGTCACCAAACTTACAAGCCAAGT	76.2415	73.2692	78.6014	68.9706
MitomiProbe_mut_2238	CTAACGAAGGTTTGTCACCACACTTACAAGCCAAGT	89.6503	76.6389	77.816	58.8041
MitomiProbe_mut_2239	CTAACGAAGGTTTGTCACCAGACTTACAAGCCAAGT	79.3642	97.3222	77.3905	86.6088
MitomiProbe_mut_224	AAAGCGGTAATTTGTCACAATACTTCACATATCTAT	104.049	100.168	99.0253	84.9861
MitomiProbe_mut_2240	CTAACGAAGGTTTGTCACCATACTTACAAGCCAAGT	80.2734	81.8426	88.0228	72.2739
MitomiProbe_mut_2241	CTAACGAAGGTTTGTCACCCAACTTACAAGCCAAGT	75.5205	69.3939	70.8038	58.7354
MitomiProbe_mut_2242	CTAACGAAGGTTTGTCACCCCACTTACAAGCCAAGT	74.6133	70.9895	81.0829	65.3259
MitomiProbe_mut_2243	CTAACGAAGGTTTGTCACCCGACTTACAAGCCAAGT	76.6752	68.21	74.0846	68.7867
MitomiProbe_mut_2244	CTAACGAAGGTTTGTCACCCTACTTACAAGCCAAGT	62.197	82.1592	74.8784	53.1214
MitomiProbe_mut_2245	CTAACGAAGGTTTGTCACCGAACTTACAAGCCAAGT	68.0354	75.2091	76.7752	68.8782
MitomiProbe_mut_2246	CTAACGAAGGTTTGTCACCGCACTTACAAGCCAAGT	65.6885	72.9452	59.8286	61.4855
MitomiProbe_mut_2247	CTAACGAAGGTTTGTCACCGGACTTACAAGCCAAGT	81.9827	69.4569	74.337	67.6399
MitomiProbe_mut_2248	CTAACGAAGGTTTGTCACCGTACTTACAAGCCAAGT	80.3401	83.2208	68.0528	66.0923
MitomiProbe_mut_2249	CTAACGAAGGTTTGTCACCTAACTTACAAGCCAAGT	70.7612	80.5303	74.5176	64.3039
MitomiProbe_mut_225	AAAGCGGTAATTTGTCACACAACTTCACATATCTAT	102.267	100.409	111.365	82.1121
MitomiProbe_mut_2250	CTAACGAAGGTTTGTCACCTCACTTACAAGCCAAGT	78.6905	72.993	77.8878	68.3767
MitomiProbe_mut_2251	CTAACGAAGGTTTGTCACCTGACTTACAAGCCAAGT	1423.32	1600.76	1443.85	2116.95
MitomiProbe_mut_2252	CTAACGAAGGTTTGTCACCTTACTTACAAGCCAAGT	77.8424	95.8568	82.4473	74.9762
MitomiProbe_mut_2253	CTAACGAAGGTTTGTCACGAAACTTACAAGCCAAGT	85.6306	79.3504	72.7642	79.4901
MitomiProbe_mut_2254	CTAACGAAGGTTTGTCACGACACTTACAAGCCAAGT	217.638	250.291	218.597	145.806
MitomiProbe_mut_2255	CTAACGAAGGTTTGTCACGAGACTTACAAGCCAAGT	852.162	1037.47	696.096	523.739
MitomiProbe_mut_2256	CTAACGAAGGTTTGTCACGATACTTACAAGCCAAGT	220.394	255.66	222.312	150.182
MitomiProbe_mut_2257	CTAACGAAGGTTTGTCACGCAACTTACAAGCCAAGT	115.134	112.457	103.336	79.1865
MitomiProbe_mut_2258	CTAACGAAGGTTTGTCACGCCACTTACAAGCCAAGT	253.869	341.831	256.658	196.104
MitomiProbe_mut_2259	CTAACGAAGGTTTGTCACGCGACTTACAAGCCAAGT	620.929	703.775	545.031	307.225
MitomiProbe_mut_226	AAAGCGGTAATTTGTCACACCACTTCACATATCTAT	148.854	149.749	149.127	117.887
MitomiProbe_mut_2260	CTAACGAAGGTTTGTCACGCTACTTACAAGCCAAGT	217.208	198.333	201.341	153.098
MitomiProbe_mut_2261	CTAACGAAGGTTTGTCACGGAACTTACAAGCCAAGT	91.4736	88.0419	87.3882	80.8615
MitomiProbe_mut_2262	CTAACGAAGGTTTGTCACGGCACTTACAAGCCAAGT	76.401	93.0465	76.2337	90.4168
MitomiProbe_mut_2263	CTAACGAAGGTTTGTCACGGGACTTACAAGCCAAGT	1357.45	1379.47	1181.55	969.108
MitomiProbe_mut_2264	CTAACGAAGGTTTGTCACGGTACTTACAAGCCAAGT	164.482	189.502	182.292	133.82
MitomiProbe_mut_2265	CTAACGAAGGTTTGTCACGTAACTTACAAGCCAAGT	104.601	101.015	95.2051	87.9037
MitomiProbe_mut_2266	CTAACGAAGGTTTGTCACGTCACTTACAAGCCAAGT	106.264	110.141	94.7194	91.3806
MitomiProbe_mut_2267	CTAACGAAGGTTTGTCACGTGACTTACAAGCCAAGT	26047	23423.4	30093	17608.3
MitomiProbe_mut_2268	CTAACGAAGGTTTGTCACGTGGGTGACAAGCCAAGT	4622.17	2544.19	783.319	170.281
MitomiProbe_mut_2269	CTAACGAAGGTTTGTCACGTGTTTTACAAGCCAAGT	4220.33	5262.52	2258.78	647.989
MitomiProbe_mut_227	AAAGCGGTAATTTGTCACACGACTTCACATATCTAT	144.615	158.843	132.514	85.1394
MitomiProbe_mut_2270	CTAACGAAGGTTTGTCACGTTACTTACAAGCCAAGT	790.644	848.476	569.331	352.456
MitomiProbe_mut_2271	CTAACGAAGGTTTGTCACTAAACTTACAAGCCAAGT	67.2593	84.268	68.7612	60.1205
MitomiProbe_mut_2272	CTAACGAAGGTTTGTCACTACACTTACAAGCCAAGT	91.9281	80.6512	106.614	85.9656
MitomiProbe_mut_2273	CTAACGAAGGTTTGTCACTAGACTTACAAGCCAAGT	73.5901	72.2995	75.894	63.4054
MitomiProbe_mut_2274	CTAACGAAGGTTTGTCACTATACTTACAAGCCAAGT	70.184	92.1966	73.3958	67.2724
MitomiProbe_mut_2275	CTAACGAAGGTTTGTCACTCAACTTACAAGCCAAGT	74.75	72.5758	59.4733	67.5278
MitomiProbe_mut_2276	CTAACGAAGGTTTGTCACTCCACTTACAAGCCAAGT	88.0114	81.6836	74.7451	59.3505
MitomiProbe_mut_2277	CTAACGAAGGTTTGTCACTCGACTTACAAGCCAAGT	63.3414	74.1667	59.4896	63.5515
MitomiProbe_mut_2278	CTAACGAAGGTTTGTCACTCTACTTACAAGCCAAGT	68.1925	77.4895	69.6335	51.0231
MitomiProbe_mut_2279	CTAACGAAGGTTTGTCACTGAACTTACAAGCCAAGT	66.5366	67.2894	63.5063	63.5139
MitomiProbe_mut_228	AAAGCGGTAATTTGTCACACTACTTCACATATCTAT	108.586	113.932	95.9331	98.2471
MitomiProbe_mut_2280	CTAACGAAGGTTTGTCACTGCACTTACAAGCCAAGT	76.3353	71.5136	71.0313	69.1894
MitomiProbe_mut_2281	CTAACGAAGGTTTGTCACTGGACTTACAAGCCAAGT	75.8302	82.5347	79.4144	80.1454
MitomiProbe_mut_2282	CTAACGAAGGTTTGTCACTGTACTTACAAGCCAAGT	70.4613	74.5484	58.0686	70.0301
MitomiProbe_mut_2283	CTAACGAAGGTTTGTCACTTAACTTACAAGCCAAGT	76.0316	72.1972	62.0429	61.2853
MitomiProbe_mut_2284	CTAACGAAGGTTTGTCACTTCACTTACAAGCCAAGT	74.3638	63.3196	73.8845	67.6722
MitomiProbe_mut_2285	CTAACGAAGGTTTGTCACTTGACTTACAAGCCAAGT	128.759	164.22	137.959	148.604
MitomiProbe_mut_2286	CTAACGAAGGTTTGTCACTTTACTTACAAGCCAAGT	82.9698	86.6918	82.8367	70.1511
MitomiProbe_mut_2287	CTAACGAAGGTTTGTCAGGTGGGTGACAAGCCAAGT	136.867	143.284	124.736	108.482
MitomiProbe_mut_2288	CTAACGAAGGTTTGTCATGTGGGTGACAAGCCAAGT	177.571	185.817	131.341	68.675
MitomiProbe_mut_2289	CTAACGAAGGTTTGTCCAGTGGGTGACAAGCCAAGT	64.3766	62.888	66.9141	58.3294
MitomiProbe_mut_229	AAAGCGGTAATTTGTCACAGAACTTCACATATCTAT	108.119	98.4762	82.88	78.4127
MitomiProbe_mut_2290	CTAACGAAGGTTTGTCCCGTGGGTGACAAGCCAAGT	89.18	88.3388	71.2325	54.8862
MitomiProbe_mut_2291	CTAACGAAGGTTTGTCCGGTGGGTGACAAGCCAAGT	66.322	64.1342	59.6696	51.6121
MitomiProbe_mut_2292	CTAACGAAGGTTTGTCCTGTGGGTGACAAGCCAAGT	69.8389	64.6904	56.9153	59.4139
MitomiProbe_mut_2293	CTAACGAAGGTTTGTCGAGTGGGTGACAAGCCAAGT	76.876	58.9137	59.8898	53.803
MitomiProbe_mut_2294	CTAACGAAGGTTTGTCGCGTGGGTGACAAGCCAAGT	80.4365	86.3735	74.3292	60.2559
MitomiProbe_mut_2295	CTAACGAAGGTTTGTCGGGTGGGTGACAAGCCAAGT	65.7896	70.5844	69.6232	61.3838
MitomiProbe_mut_2296	CTAACGAAGGTTTGTCGTGTGGGTGACAAGCCAAGT	65.3942	75.1906	67.146	46.8739
MitomiProbe_mut_2297	CTAACGAAGGTTTGTCTAGTGGGTGACAAGCCAAGT	77.4634	69.1013	71.8624	54.6717
MitomiProbe_mut_2298	CTAACGAAGGTTTGTCTCGTGGGTGACAAGCCAAGT	95.647	85.7885	65.0902	56.7583
MitomiProbe_mut_2299	CTAACGAAGGTTTGTCTGGTGGGTGACAAGCCAAGT	68.2829	71.165	60.0994	59.3012
MitomiProbe_mut_23	AAAGCGGTAATTTGAATGGTGGGTGCAGATATCTAT	72.6528	78.9419	67.0363	61.9058
MitomiProbe_mut_230	AAAGCGGTAATTTGTCACAGCACTTCACATATCTAT	87.2603	84.2384	70.7372	76.7486
MitomiProbe_mut_2300	CTAACGAAGGTTTGTCTTGTGGGTGACAAGCCAAGT	68.3622	68.2594	64.1228	66.5983
MitomiProbe_mut_2301	CTAACGAAGGTTTGTGAAGTGGGTGACAAGCCAAGT	80.3942	68.1018	62.5828	55.8099
MitomiProbe_mut_2302	CTAACGAAGGTTTGTGACGTGGGTGACAAGCCAAGT	63.6881	86.3564	60.1675	60.1395
MitomiProbe_mut_2303	CTAACGAAGGTTTGTGAGGTGGGTGACAAGCCAAGT	68.0296	76.7685	70.4595	57.9327
MitomiProbe_mut_2304	CTAACGAAGGTTTGTGATGTGGGTGACAAGCCAAGT	75.4821	69.8013	66.0106	54.5565
MitomiProbe_mut_2305	CTAACGAAGGTTTGTGCAGTGGGTGACAAGCCAAGT	71.4023	73.7958	69.7484	52.9586
MitomiProbe_mut_2306	CTAACGAAGGTTTGTGCCGTGGGTGACAAGCCAAGT	64.6191	65.5286	54.331	52.6838
MitomiProbe_mut_2307	CTAACGAAGGTTTGTGCGGTGGGTGACAAGCCAAGT	62.3931	70.0153	68.4	47.1631
MitomiProbe_mut_2308	CTAACGAAGGTTTGTGCTGTGGGTGACAAGCCAAGT	71.3206	63.2554	67.4761	43.9483
MitomiProbe_mut_2309	CTAACGAAGGTTTGTGGAGTGGGTGACAAGCCAAGT	60.2297	61.349	60.6142	57.9394
MitomiProbe_mut_231	AAAGCGGTAATTTGTCACAGGACTTCACATATCTAT	137.071	132.197	126.729	114.44
MitomiProbe_mut_2310	CTAACGAAGGTTTGTGGCGTGGGTGACAAGCCAAGT	67.0002	80.3472	66.0966	53.4582
MitomiProbe_mut_2311	CTAACGAAGGTTTGTGGGGTGGGTGACAAGCCAAGT	72.2342	77.1298	60.2584	54.651
MitomiProbe_mut_2312	CTAACGAAGGTTTGTGGTGTGGGTGACAAGCCAAGT	75.6564	63.1613	64.6889	42.3217
MitomiProbe_mut_2313	CTAACGAAGGTTTGTGTAGTGGGTGACAAGCCAAGT	70.0597	84.2342	63.0353	66.4018
MitomiProbe_mut_2314	CTAACGAAGGTTTGTGTCGTGGGTGACAAGCCAAGT	77.1405	74.8466	67.2715	51.7726
MitomiProbe_mut_2315	CTAACGAAGGTTTGTGTGGTGGGTGACAAGCCAAGT	75.4823	61.6183	64.9788	64.5725
MitomiProbe_mut_2316	CTAACGAAGGTTTGTGTTGTGGGTGACAAGCCAAGT	80.5545	68.1328	66.943	63.9688
MitomiProbe_mut_2317	CTAACGAAGGTTTGTTAAGTGGGTGACAAGCCAAGT	65	71.3122	80.9514	75.2222
MitomiProbe_mut_2318	CTAACGAAGGTTTGTTACGTGGGTGACAAGCCAAGT	70.7334	61.1698	67.253	47.7605
MitomiProbe_mut_2319	CTAACGAAGGTTTGTTAGGTGGGTGACAAGCCAAGT	63.0383	74.0147	80.5486	72.8286
MitomiProbe_mut_232	AAAGCGGTAATTTGTCACAGTACTTCACATATCTAT	85.68	86.7212	89.3027	81.8371
MitomiProbe_mut_2320	CTAACGAAGGTTTGTTATGTGGGTGACAAGCCAAGT	73.6667	87.1823	74.5357	73.719
MitomiProbe_mut_2321	CTAACGAAGGTTTGTTCAGTGGGTGACAAGCCAAGT	69.9091	66.8056	65.7736	53.7389
MitomiProbe_mut_2322	CTAACGAAGGTTTGTTCCGTGGGTGACAAGCCAAGT	61.9855	72.6676	61.3878	58.1244
MitomiProbe_mut_2323	CTAACGAAGGTTTGTTCGGTGGGTGACAAGCCAAGT	67.283	57.5077	63.1106	52.9885
MitomiProbe_mut_2324	CTAACGAAGGTTTGTTCTGTGGGTGACAAGCCAAGT	72.2344	76.5931	62.2846	61.4707
MitomiProbe_mut_2325	CTAACGAAGGTTTGTTGAGTGGGTGACAAGCCAAGT	77.6176	75.5484	65.4278	57.3581
MitomiProbe_mut_2326	CTAACGAAGGTTTGTTGCGTGGGTGACAAGCCAAGT	63.6467	62.7245	68.9765	52.0456
MitomiProbe_mut_2327	CTAACGAAGGTTTGTTGGGTGGGTGACAAGCCAAGT	73.1915	65.4585	67.5741	54.7323
MitomiProbe_mut_2328	CTAACGAAGGTTTGTTGTGTGGGTGACAAGCCAAGT	87.55	84.0654	68.7295	68.1659
MitomiProbe_mut_2329	CTAACGAAGGTTTGTTTAGTGGGTGACAAGCCAAGT	76.1184	79.6627	70.6225	72.3879
MitomiProbe_mut_233	AAAGCGGTAATTTGTCACATAACTTCACATATCTAT	89.9889	87.625	89.1255	69.9767
MitomiProbe_mut_2330	CTAACGAAGGTTTGTTTCGTGGGTGACAAGCCAAGT	64.7875	67.8913	75.3912	63.1714
MitomiProbe_mut_2331	CTAACGAAGGTTTGTTTGGTGGGTGACAAGCCAAGT	66.8333	66.7666	66.1928	56.5462
MitomiProbe_mut_2332	CTAACGAAGGTTTGTTTTGTGGGTGACAAGCCAAGT	73.6067	71.8289	74.8157	67.4815
MitomiProbe_mut_2333	CTAACGAAGGTTTTACACGTGTTTTACAAGCCAAGT	1436.83	713.33	280.727	114.612
MitomiProbe_mut_2334	CTAACGAAGGTTTTCCACGTGTTTTACAAGCCAAGT	775.125	419.425	191.36	95.1825
MitomiProbe_mut_2335	CTAACGAAGGTTTTGCACGTGTTTTACAAGCCAAGT	2159.6	917.045	301.857	102.873
MitomiProbe_mut_2336	CTAACGAAGGTTTTTCACGTGAAATACAAGCCAAGT	913.99	789.836	561.617	341.816
MitomiProbe_mut_2337	CTAACGAAGGTTTTTCACGTGAACTACAAGCCAAGT	1115.39	920.076	664.366	372.562
MitomiProbe_mut_2338	CTAACGAAGGTTTTTCACGTGAAGTACAAGCCAAGT	560.528	628.15	442.69	222.045
MitomiProbe_mut_2339	CTAACGAAGGTTTTTCACGTGAATTACAAGCCAAGT	888.364	854.317	480.839	346.687
MitomiProbe_mut_234	AAAGCGGTAATTTGTCACATCACTTCACATATCTAT	82.9875	99.2599	98.9798	74.7214
MitomiProbe_mut_2340	CTAACGAAGGTTTTTCACGTGACATACAAGCCAAGT	5330.1	7442.67	5353.64	3467.39
MitomiProbe_mut_2341	CTAACGAAGGTTTTTCACGTGACCTACAAGCCAAGT	8670.41	10765.5	10497.3	8359.3
MitomiProbe_mut_2342	CTAACGAAGGTTTTTCACGTGACGTACAAGCCAAGT	3121.99	5802.99	1945.77	2072.33
MitomiProbe_mut_2343	CTAACGAAGGTTTTTCACGTGACTTACAAGCCAAGT	7528.95	10396.2	6727.5	6710.39
MitomiProbe_mut_2344	CTAACGAAGGTTTTTCACGTGAGATACAAGCCAAGT	1038.53	869.675	576.884	313.579
MitomiProbe_mut_2345	CTAACGAAGGTTTTTCACGTGAGCTACAAGCCAAGT	1145.69	935.489	561.56	329.934
MitomiProbe_mut_2346	CTAACGAAGGTTTTTCACGTGAGGTACAAGCCAAGT	847.814	809.937	527.593	257.795
MitomiProbe_mut_2347	CTAACGAAGGTTTTTCACGTGAGTTACAAGCCAAGT	860.302	810.956	642.012	249.517
MitomiProbe_mut_2348	CTAACGAAGGTTTTTCACGTGATATACAAGCCAAGT	3110.47	4077.59	2741.3	1488.77
MitomiProbe_mut_2349	CTAACGAAGGTTTTTCACGTGATCTACAAGCCAAGT	7296.01	7721.62	6886.84	4548.16
MitomiProbe_mut_235	AAAGCGGTAATTTGTCACATGACTTCACATATCTAT	3158.74	3155.21	3212.85	3884.83
MitomiProbe_mut_2350	CTAACGAAGGTTTTTCACGTGATGTACAAGCCAAGT	3899.02	3291.39	2859.93	1520.96
MitomiProbe_mut_2351	CTAACGAAGGTTTTTCACGTGATTTACAAGCCAAGT	4525.23	4844.01	3874.43	2123.42
MitomiProbe_mut_2352	CTAACGAAGGTTTTTCACGTGCAATACAAGCCAAGT	1084.84	689.969	466.021	177.271
MitomiProbe_mut_2353	CTAACGAAGGTTTTTCACGTGCACTACAAGCCAAGT	862.394	742.636	366.786	138.202
MitomiProbe_mut_2354	CTAACGAAGGTTTTTCACGTGCAGTACAAGCCAAGT	968.48	625.41	339.943	155.547
MitomiProbe_mut_2355	CTAACGAAGGTTTTTCACGTGCATTACAAGCCAAGT	923.279	659.893	415.189	149.071
MitomiProbe_mut_2356	CTAACGAAGGTTTTTCACGTGCCATACAAGCCAAGT	1110.69	826.051	377.648	127.564
MitomiProbe_mut_2357	CTAACGAAGGTTTTTCACGTGCCCTACAAGCCAAGT	1187.79	661.57	337.618	115.309
MitomiProbe_mut_2358	CTAACGAAGGTTTTTCACGTGCCGTACAAGCCAAGT	1133.14	796.716	334.737	130.261
MitomiProbe_mut_2359	CTAACGAAGGTTTTTCACGTGCCTTACAAGCCAAGT	1284.51	591.887	355.85	127.03
MitomiProbe_mut_236	AAAGCGGTAATTTGTCACATTACTTCACATATCTAT	118.127	146.801	138.963	118.069
MitomiProbe_mut_2360	CTAACGAAGGTTTTTCACGTGCGATACAAGCCAAGT	766.002	405.729	271.871	104.329
MitomiProbe_mut_2361	CTAACGAAGGTTTTTCACGTGCGCTACAAGCCAAGT	972.237	559.553	267.283	127.876
MitomiProbe_mut_2362	CTAACGAAGGTTTTTCACGTGCGGTACAAGCCAAGT	720.364	442.147	239.283	105.355
MitomiProbe_mut_2363	CTAACGAAGGTTTTTCACGTGCGTTACAAGCCAAGT	731.536	545.873	241.883	105.435
MitomiProbe_mut_2364	CTAACGAAGGTTTTTCACGTGCTATACAAGCCAAGT	1060.64	630.322	296.326	119.989
MitomiProbe_mut_2365	CTAACGAAGGTTTTTCACGTGCTCTACAAGCCAAGT	1237.55	776.541	348.254	140.453
MitomiProbe_mut_2366	CTAACGAAGGTTTTTCACGTGCTGTACAAGCCAAGT	1158	746.523	377.883	140.806
MitomiProbe_mut_2367	CTAACGAAGGTTTTTCACGTGCTTTACAAGCCAAGT	1362.02	968.265	396.261	152.157
MitomiProbe_mut_2368	CTAACGAAGGTTTTTCACGTGGAATACAAGCCAAGT	639.209	356.006	224.223	111.866
MitomiProbe_mut_2369	CTAACGAAGGTTTTTCACGTGGACTACAAGCCAAGT	539.781	530.582	182.244	129.729
MitomiProbe_mut_237	AAAGCGGTAATTTGTCACCAAACTTCACATATCTAT	85.3161	77.7183	76.1653	76.7233
MitomiProbe_mut_2370	CTAACGAAGGTTTTTCACGTGGAGTACAAGCCAAGT	527.441	324.868	221.838	90.6481
MitomiProbe_mut_2371	CTAACGAAGGTTTTTCACGTGGATTACAAGCCAAGT	541.061	447.779	237.156	107.151
MitomiProbe_mut_2372	CTAACGAAGGTTTTTCACGTGGCATACAAGCCAAGT	921.346	491.302	259.485	112.819
MitomiProbe_mut_2373	CTAACGAAGGTTTTTCACGTGGCCTACAAGCCAAGT	791.052	563.76	272.296	109.423
MitomiProbe_mut_2374	CTAACGAAGGTTTTTCACGTGGCGTACAAGCCAAGT	579.327	475.835	203.923	95.1772
MitomiProbe_mut_2375	CTAACGAAGGTTTTTCACGTGGCTTACAAGCCAAGT	937.615	502.186	251.709	114.687
MitomiProbe_mut_2376	CTAACGAAGGTTTTTCACGTGGGATACAAGCCAAGT	605.783	369.392	193.062	92.7463
MitomiProbe_mut_2377	CTAACGAAGGTTTTTCACGTGGGCTACAAGCCAAGT	838.052	435.994	209.911	94.6695
MitomiProbe_mut_2378	CTAACGAAGGTTTTTCACGTGGGGTACAAGCCAAGT	623.358	377.103	175.232	81.0471
MitomiProbe_mut_2379	CTAACGAAGGTTTTTCACGTGGGTTACAAGCCAAGT	732.459	426.878	191.349	117.242
MitomiProbe_mut_238	AAAGCGGTAATTTGTCACCACACTTCACATATCTAT	105.371	92.091	86.6215	81.5565
MitomiProbe_mut_2380	CTAACGAAGGTTTTTCACGTGGTATACAAGCCAAGT	1160.06	633.264	351.359	133.002
MitomiProbe_mut_2381	CTAACGAAGGTTTTTCACGTGGTCTACAAGCCAAGT	1135.42	1028.04	351.923	164.929
MitomiProbe_mut_2382	CTAACGAAGGTTTTTCACGTGGTGTACAAGCCAAGT	833.342	703.902	304.512	129.45
MitomiProbe_mut_2383	CTAACGAAGGTTTTTCACGTGGTTTACAAGCCAAGT	1226.05	899.428	465.401	172.98
MitomiProbe_mut_2384	CTAACGAAGGTTTTTCACGTGTAATACAAGCCAAGT	742.181	588.999	316.582	165.177
MitomiProbe_mut_2385	CTAACGAAGGTTTTTCACGTGTACTACAAGCCAAGT	822.148	690.148	370.171	161.173
MitomiProbe_mut_2386	CTAACGAAGGTTTTTCACGTGTAGTACAAGCCAAGT	648.283	451.449	294.613	127.036
MitomiProbe_mut_2387	CTAACGAAGGTTTTTCACGTGTATTACAAGCCAAGT	730.578	592.537	307.656	171.173
MitomiProbe_mut_2388	CTAACGAAGGTTTTTCACGTGTCATACAAGCCAAGT	1117.61	855.222	405.119	129.674
MitomiProbe_mut_2389	CTAACGAAGGTTTTTCACGTGTCCTACAAGCCAAGT	955.879	596.227	380.808	138.467
MitomiProbe_mut_239	AAAGCGGTAATTTGTCACCAGACTTCACATATCTAT	108.85	88.0927	114.329	85.4375
MitomiProbe_mut_2390	CTAACGAAGGTTTTTCACGTGTCGTACAAGCCAAGT	803.351	738.647	316.023	151.88
MitomiProbe_mut_2391	CTAACGAAGGTTTTTCACGTGTCTTACAAGCCAAGT	947.693	752.667	411.87	147.056
MitomiProbe_mut_2392	CTAACGAAGGTTTTTCACGTGTGATACAAGCCAAGT	654.431	504.038	264.494	119.088
MitomiProbe_mut_2393	CTAACGAAGGTTTTTCACGTGTGCTACAAGCCAAGT	650.124	552.279	219.066	129.271
MitomiProbe_mut_2394	CTAACGAAGGTTTTTCACGTGTGGTACAAGCCAAGT	566.903	411.336	221.68	96.3334
MitomiProbe_mut_2395	CTAACGAAGGTTTTTCACGTGTGTTACAAGCCAAGT	582.348	457.389	217.925	124.163
MitomiProbe_mut_2396	CTAACGAAGGTTTTTCACGTGTTATACAAGCCAAGT	907.951	793.426	368.406	160.984
MitomiProbe_mut_2397	CTAACGAAGGTTTTTCACGTGTTCTACAAGCCAAGT	1435.96	959.265	466.424	179.304
MitomiProbe_mut_2398	CTAACGAAGGTTTTTCACGTGTTGTACAAGCCAAGT	1075.87	710.15	415.786	149.107
MitomiProbe_mut_2399	CTAACGAAGGTTTTTCACGTGTTTTACAAGCCAAGT	974.655	657.072	313.075	141.644
MitomiProbe_mut_24	AAAGCGGTAATTTGAATTGTGGGTGCAGATATCTAT	78.9854	80.9304	65.9181	77.106
MitomiProbe_mut_240	AAAGCGGTAATTTGTCACCATACTTCACATATCTAT	93.9388	93.4795	88.1956	54.6831
MitomiProbe_mut_2400	CTAACGAAGGTTTTTCACGTGTTTTACAAGCCAAGT	914.347	679.804	396.23	148.56
MitomiProbe_mut_2401	CTTCTGTAAATTTAACACGTGTTTTGACGCGCCCCG	2572.21	934.5	408.462	113.851
MitomiProbe_mut_2402	CTTCTGTAAATTTACCACGTGTTTTGACGCGCCCCG	1317.06	927.765	234.24	90.131
MitomiProbe_mut_2403	CTTCTGTAAATTTAGCACGTGTTTTGACGCGCCCCG	2918.88	1404.87	343.053	113.248
MitomiProbe_mut_2404	CTTCTGTAAATTTATCACGTGTTTTGACGCGCCCCG	4523.83	4397.05	1213.46	552.065
MitomiProbe_mut_2405	CTTCTGTAAATTTCACACGTGTTTTGACGCGCCCCG	951.773	715	190.435	100.254
MitomiProbe_mut_2406	CTTCTGTAAATTTCCCACGTGTTTTGACGCGCCCCG	846.901	511.493	156.066	73.4839
MitomiProbe_mut_2407	CTTCTGTAAATTTCGCACGTGTTTTGACGCGCCCCG	1183.39	588.593	190.3	86.9986
MitomiProbe_mut_2408	CTTCTGTAAATTTCTCACGTGTTTTGACGCGCCCCG	1227.44	726.509	415.211	127.299
MitomiProbe_mut_2409	CTTCTGTAAATTTGAAAAGTGGGTGGACGCGCCCCG	101.302	105.042	92.2656	56.6476
MitomiProbe_mut_241	AAAGCGGTAATTTGTCACCCAACTTCACATATCTAT	74.2729	79.795	72.2594	79.6417
MitomiProbe_mut_2410	CTTCTGTAAATTTGAAACGTGGGTGGACGCGCCCCG	96.3122	76.7724	80.1552	48.8002
MitomiProbe_mut_2411	CTTCTGTAAATTTGAAAGGTGGGTGGACGCGCCCCG	86.2712	86.9141	67.0903	51.9389
MitomiProbe_mut_2412	CTTCTGTAAATTTGAAATGTGGGTGGACGCGCCCCG	64.328	91.1832	62.5871	56.7482
MitomiProbe_mut_2413	CTTCTGTAAATTTGAACAGTGGGTGGACGCGCCCCG	67.2983	83.6128	71.2994	50.5091
MitomiProbe_mut_2414	CTTCTGTAAATTTGAACCGTGGGTGGACGCGCCCCG	66.6794	77.3693	64.9519	54.6708
MitomiProbe_mut_2415	CTTCTGTAAATTTGAACGGTGGGTGGACGCGCCCCG	80.7044	74.9491	69.0637	59.6331
MitomiProbe_mut_2416	CTTCTGTAAATTTGAACTGTGGGTGGACGCGCCCCG	76.1733	70.8739	67.2095	63.1824
MitomiProbe_mut_2417	CTTCTGTAAATTTGAAGAGTGGGTGGACGCGCCCCG	84.6036	71.3309	68.3139	56.3651
MitomiProbe_mut_2418	CTTCTGTAAATTTGAAGCGTGGGTGGACGCGCCCCG	95.3258	67.5388	69.2835	56.7812
MitomiProbe_mut_2419	CTTCTGTAAATTTGAAGGGTGGGTGGACGCGCCCCG	83.0808	73.543	69.7371	43.6359
MitomiProbe_mut_242	AAAGCGGTAATTTGTCACCCCACTTCACATATCTAT	79.6437	71.1652	78.8749	66.1314
MitomiProbe_mut_2420	CTTCTGTAAATTTGAAGTGTGGGTGGACGCGCCCCG	82.6115	81.6765	77.3917	58.4484
MitomiProbe_mut_2421	CTTCTGTAAATTTGAATAGTGGGTGGACGCGCCCCG	91.1566	89.7946	92.4316	67.4655
MitomiProbe_mut_2422	CTTCTGTAAATTTGAATCGTGGGTGGACGCGCCCCG	77.35	88.4067	64.3952	48.1347
MitomiProbe_mut_2423	CTTCTGTAAATTTGAATGGTGGGTGGACGCGCCCCG	87.3434	78.8233	77.5735	53.836
MitomiProbe_mut_2424	CTTCTGTAAATTTGAATTGTGGGTGGACGCGCCCCG	83.7619	90.6081	56.0384	66.4931
MitomiProbe_mut_2425	CTTCTGTAAATTTGACAAGTGGGTGGACGCGCCCCG	73.891	70.1133	80.5245	45.6576
MitomiProbe_mut_2426	CTTCTGTAAATTTGACACGTGGGTGGACGCGCCCCG	1105.71	472.621	136.541	71.9426
MitomiProbe_mut_2427	CTTCTGTAAATTTGACACGTGTTTTGACGCGCCCCG	1672.58	978.347	301.63	109.171
MitomiProbe_mut_2428	CTTCTGTAAATTTGACAGGTGGGTGGACGCGCCCCG	71.1096	65.3765	64.585	42.0701
MitomiProbe_mut_2429	CTTCTGTAAATTTGACATGTGGGTGGACGCGCCCCG	87.1641	91.8404	93.1197	64.6082
MitomiProbe_mut_243	AAAGCGGTAATTTGTCACCCGACTTCACATATCTAT	90.5151	94.3737	83.5561	83.7264
MitomiProbe_mut_2430	CTTCTGTAAATTTGACCAGTGGGTGGACGCGCCCCG	73.1164	72.1246	54.346	51.0164
MitomiProbe_mut_2431	CTTCTGTAAATTTGACCCGTGGGTGGACGCGCCCCG	76.3382	75.3461	69.5538	50.0389
MitomiProbe_mut_2432	CTTCTGTAAATTTGACCGGTGGGTGGACGCGCCCCG	78.5777	56.4433	59.5561	48.6645
MitomiProbe_mut_2433	CTTCTGTAAATTTGACCTGTGGGTGGACGCGCCCCG	66.23	86.6702	68.9563	59.3457
MitomiProbe_mut_2434	CTTCTGTAAATTTGACGAGTGGGTGGACGCGCCCCG	81.9596	71.3214	66.0311	74.5902
MitomiProbe_mut_2435	CTTCTGTAAATTTGACGCGTGGGTGGACGCGCCCCG	92.3301	68.1347	63.0678	65.4235
MitomiProbe_mut_2436	CTTCTGTAAATTTGACGGGTGGGTGGACGCGCCCCG	73.8703	74.0936	72.5551	60.1023
MitomiProbe_mut_2437	CTTCTGTAAATTTGACGTGTGGGTGGACGCGCCCCG	96.2051	74.1233	70.5777	51.7389
MitomiProbe_mut_2438	CTTCTGTAAATTTGACTAGTGGGTGGACGCGCCCCG	79.5071	86.7345	64.7281	53.4405
MitomiProbe_mut_2439	CTTCTGTAAATTTGACTCGTGGGTGGACGCGCCCCG	89.5395	84.4052	65.8549	60.8659
MitomiProbe_mut_244	AAAGCGGTAATTTGTCACCCTACTTCACATATCTAT	74.6188	78.6973	76.7163	70.6501
MitomiProbe_mut_2440	CTTCTGTAAATTTGACTGGTGGGTGGACGCGCCCCG	69.4579	67.1871	54.2944	60.165
MitomiProbe_mut_2441	CTTCTGTAAATTTGACTTGTGGGTGGACGCGCCCCG	80.5648	65.4741	78.3357	45.9493
MitomiProbe_mut_2442	CTTCTGTAAATTTGAGAAGTGGGTGGACGCGCCCCG	73.775	74.4963	69.7	52.3164
MitomiProbe_mut_2443	CTTCTGTAAATTTGAGACGTGGGTGGACGCGCCCCG	67.0123	72.0842	62.0097	56.8828
MitomiProbe_mut_2444	CTTCTGTAAATTTGAGAGGTGGGTGGACGCGCCCCG	85.0517	78.4471	70.6995	66.5563
MitomiProbe_mut_2445	CTTCTGTAAATTTGAGATGTGGGTGGACGCGCCCCG	91.1152	87.3585	76.2179	68.7403
MitomiProbe_mut_2446	CTTCTGTAAATTTGAGCAGTGGGTGGACGCGCCCCG	70.2926	75.0458	63.8554	64.8618
MitomiProbe_mut_2447	CTTCTGTAAATTTGAGCCGTGGGTGGACGCGCCCCG	79.9472	85.7523	90.7403	48.4969
MitomiProbe_mut_2448	CTTCTGTAAATTTGAGCGGTGGGTGGACGCGCCCCG	80.5449	68.1406	67.1697	72.6875
MitomiProbe_mut_2449	CTTCTGTAAATTTGAGCTGTGGGTGGACGCGCCCCG	81.1041	72.7417	61.4438	52.1734
MitomiProbe_mut_245	AAAGCGGTAATTTGTCACCGAACTTCACATATCTAT	81.4864	80.0614	70.9165	72.0303
MitomiProbe_mut_2450	CTTCTGTAAATTTGAGGAGTGGGTGGACGCGCCCCG	94.8411	75.5998	66.9422	57.3795
MitomiProbe_mut_2451	CTTCTGTAAATTTGAGGCGTGGGTGGACGCGCCCCG	74.9988	76.8679	64.6116	53.8393
MitomiProbe_mut_2452	CTTCTGTAAATTTGAGGGGTGGGTGGACGCGCCCCG	90.6384	82.9006	78.3561	60.4657
MitomiProbe_mut_2453	CTTCTGTAAATTTGAGGTGTGGGTGGACGCGCCCCG	65.5484	76.0388	65.3028	52.9985
MitomiProbe_mut_2454	CTTCTGTAAATTTGAGTAGTGGGTGGACGCGCCCCG	97.6658	73.5424	75.4479	55.7028
MitomiProbe_mut_2455	CTTCTGTAAATTTGAGTCGTGGGTGGACGCGCCCCG	82.7936	75.4253	61.289	54.7698
MitomiProbe_mut_2456	CTTCTGTAAATTTGAGTGGTGGGTGGACGCGCCCCG	85.8368	93.0554	74.0345	60.9466
MitomiProbe_mut_2457	CTTCTGTAAATTTGAGTTGTGGGTGGACGCGCCCCG	81.1449	85.4187	88.4217	59.2168
MitomiProbe_mut_2458	CTTCTGTAAATTTGATAAGTGGGTGGACGCGCCCCG	76.5748	77.529	67.8846	64.2452
MitomiProbe_mut_2459	CTTCTGTAAATTTGATACGTGGGTGGACGCGCCCCG	76.3358	74.6897	57.8031	42.9179
MitomiProbe_mut_246	AAAGCGGTAATTTGTCACCGCACTTCACATATCTAT	69.6447	75.1108	72.0408	58.8362
MitomiProbe_mut_2460	CTTCTGTAAATTTGATAGGTGGGTGGACGCGCCCCG	92.0083	93.3145	80.5738	58.7509
MitomiProbe_mut_2461	CTTCTGTAAATTTGATATGTGGGTGGACGCGCCCCG	86.1084	85.0653	73.2794	67.4824
MitomiProbe_mut_2462	CTTCTGTAAATTTGATCAGTGGGTGGACGCGCCCCG	76.4035	73.9307	69.4657	56.2931
MitomiProbe_mut_2463	CTTCTGTAAATTTGATCCGTGGGTGGACGCGCCCCG	80.709	71.1875	68.3892	51.5612
MitomiProbe_mut_2464	CTTCTGTAAATTTGATCGGTGGGTGGACGCGCCCCG	75.985	67.3935	68.0619	53.7269
MitomiProbe_mut_2465	CTTCTGTAAATTTGATCTGTGGGTGGACGCGCCCCG	78.8901	75.1133	79.8187	61.6989
MitomiProbe_mut_2466	CTTCTGTAAATTTGATGAGTGGGTGGACGCGCCCCG	68.7673	77.0886	72.2537	63.9985
MitomiProbe_mut_2467	CTTCTGTAAATTTGATGCGTGGGTGGACGCGCCCCG	94.9521	83.0176	83.4076	54.2321
MitomiProbe_mut_2468	CTTCTGTAAATTTGATGGGTGGGTGGACGCGCCCCG	89.1062	72.1108	79.207	90.8053
MitomiProbe_mut_2469	CTTCTGTAAATTTGATGTGTGGGTGGACGCGCCCCG	104.212	94.1394	80.5256	61.8952
MitomiProbe_mut_247	AAAGCGGTAATTTGTCACCGGACTTCACATATCTAT	104.02	105.175	93.5139	83.1651
MitomiProbe_mut_2470	CTTCTGTAAATTTGATTAGTGGGTGGACGCGCCCCG	78.9856	80.0638	68.3396	59.0678
MitomiProbe_mut_2471	CTTCTGTAAATTTGATTCGTGGGTGGACGCGCCCCG	91.0266	88.3881	65.8964	49.4603
MitomiProbe_mut_2472	CTTCTGTAAATTTGATTGGTGGGTGGACGCGCCCCG	99.0792	103.837	68.6631	61.2256
MitomiProbe_mut_2473	CTTCTGTAAATTTGATTTGTGGGTGGACGCGCCCCG	91.5754	98.3873	87.4639	60.4453
MitomiProbe_mut_2474	CTTCTGTAAATTTGCAAAGTGGGTGGACGCGCCCCG	97.2708	88.2253	73.8676	50.0107
MitomiProbe_mut_2475	CTTCTGTAAATTTGCAACGTGGGTGGACGCGCCCCG	83.219	87.758	71.0439	50.2789
MitomiProbe_mut_2476	CTTCTGTAAATTTGCAAGGTGGGTGGACGCGCCCCG	71.978	78.1259	66.5899	48.6582
MitomiProbe_mut_2477	CTTCTGTAAATTTGCAATGTGGGTGGACGCGCCCCG	79.2096	72.4395	80.7011	51.4693
MitomiProbe_mut_2478	CTTCTGTAAATTTGCACAGTGGGTGGACGCGCCCCG	68.0777	84.766	51.3831	69.0013
MitomiProbe_mut_2479	CTTCTGTAAATTTGCACCGTGGGTGGACGCGCCCCG	72.7581	85.9392	68.7147	45.5468
MitomiProbe_mut_248	AAAGCGGTAATTTGTCACCGTACTTCACATATCTAT	82.3017	79.9977	92.8074	91.1881
MitomiProbe_mut_2480	CTTCTGTAAATTTGCACGGTGGGTGGACGCGCCCCG	77.3533	81.3952	67.8803	58.8807
MitomiProbe_mut_2481	CTTCTGTAAATTTGCACTGTGGGTGGACGCGCCCCG	83.5582	83.8047	71.8236	61.3943
MitomiProbe_mut_2482	CTTCTGTAAATTTGCAGAGTGGGTGGACGCGCCCCG	66.108	77.6237	62.6081	58.866
MitomiProbe_mut_2483	CTTCTGTAAATTTGCAGCGTGGGTGGACGCGCCCCG	72.1303	70.8862	58.9155	50.3344
MitomiProbe_mut_2484	CTTCTGTAAATTTGCAGGGTGGGTGGACGCGCCCCG	84.7437	69.7407	63.2329	53.9141
MitomiProbe_mut_2485	CTTCTGTAAATTTGCAGTGTGGGTGGACGCGCCCCG	68.0136	90.6269	66.3971	53.6166
MitomiProbe_mut_2486	CTTCTGTAAATTTGCATAGTGGGTGGACGCGCCCCG	76.4068	84.0996	65.6988	47.3478
MitomiProbe_mut_2487	CTTCTGTAAATTTGCATCGTGGGTGGACGCGCCCCG	83.9667	78.9694	69.6539	54.8462
MitomiProbe_mut_2488	CTTCTGTAAATTTGCATGGTGGGTGGACGCGCCCCG	60.6531	71.4171	77.25	53.3703
MitomiProbe_mut_2489	CTTCTGTAAATTTGCATTGTGGGTGGACGCGCCCCG	73.9074	62.1753	67.562	49.9317
MitomiProbe_mut_249	AAAGCGGTAATTTGTCACCTAACTTCACATATCTAT	71.0469	82.1888	66.4986	85.0385
MitomiProbe_mut_2490	CTTCTGTAAATTTGCCAAGTGGGTGGACGCGCCCCG	73.9072	81.3638	62.3092	60.8828
MitomiProbe_mut_2491	CTTCTGTAAATTTGCCACGTGGGTGGACGCGCCCCG	970.617	412.316	128.009	81.753
MitomiProbe_mut_2492	CTTCTGTAAATTTGCCACGTGTTTTGACGCGCCCCG	966.98	597.637	208.257	93.922
MitomiProbe_mut_2493	CTTCTGTAAATTTGCCAGGTGGGTGGACGCGCCCCG	105.436	81.95	72.1789	69.1754
MitomiProbe_mut_2494	CTTCTGTAAATTTGCCATGTGGGTGGACGCGCCCCG	114.263	78.04	78.0267	58.8324
MitomiProbe_mut_2495	CTTCTGTAAATTTGCCCAGTGGGTGGACGCGCCCCG	81.2218	65.4433	69.4252	57.025
MitomiProbe_mut_2496	CTTCTGTAAATTTGCCCCGTGGGTGGACGCGCCCCG	100.111	92.7385	66.4875	42.6364
MitomiProbe_mut_2497	CTTCTGTAAATTTGCCCGGTGGGTGGACGCGCCCCG	68.361	79.7476	79.0166	48.9142
MitomiProbe_mut_2498	CTTCTGTAAATTTGCCCTGTGGGTGGACGCGCCCCG	81.9745	67.2262	73.5892	66.3539
MitomiProbe_mut_2499	CTTCTGTAAATTTGCCGAGTGGGTGGACGCGCCCCG	76.4465	75.1012	59.0871	45.8772
MitomiProbe_mut_25	AAAGCGGTAATTTGACAAGTGGGTGCAGATATCTAT	71.5209	73.2035	76.6861	63.3909
MitomiProbe_mut_250	AAAGCGGTAATTTGTCACCTCACTTCACATATCTAT	78.4643	63.6401	71.1591	77.1663
MitomiProbe_mut_2500	CTTCTGTAAATTTGCCGCGTGGGTGGACGCGCCCCG	89.1282	79.8794	70.463	55.2422
MitomiProbe_mut_2501	CTTCTGTAAATTTGCCGGGTGGGTGGACGCGCCCCG	88.8292	58.0301	64.2771	48.7623
MitomiProbe_mut_2502	CTTCTGTAAATTTGCCGTGTGGGTGGACGCGCCCCG	67.4001	81.6792	58.916	51.9963
MitomiProbe_mut_2503	CTTCTGTAAATTTGCCTAGTGGGTGGACGCGCCCCG	75.5163	74.0981	75.7894	56.5882
MitomiProbe_mut_2504	CTTCTGTAAATTTGCCTCGTGGGTGGACGCGCCCCG	96.634	82.8538	77.1528	56.2793
MitomiProbe_mut_2505	CTTCTGTAAATTTGCCTGGTGGGTGGACGCGCCCCG	69.4198	78.0459	62.4656	55.8582
MitomiProbe_mut_2506	CTTCTGTAAATTTGCCTTGTGGGTGGACGCGCCCCG	84.4435	74.9787	65.7232	56.8485
MitomiProbe_mut_2507	CTTCTGTAAATTTGCGAAGTGGGTGGACGCGCCCCG	68.2881	72.6966	63.5472	54.8422
MitomiProbe_mut_2508	CTTCTGTAAATTTGCGACGTGGGTGGACGCGCCCCG	68.5432	87.7903	55.9091	50.0986
MitomiProbe_mut_2509	CTTCTGTAAATTTGCGAGGTGGGTGGACGCGCCCCG	85.1119	79.2503	76.4516	61.2422
MitomiProbe_mut_251	AAAGCGGTAATTTGTCACCTGACTTCACATATCTAT	2167.35	2416.27	1906.41	2584.54
MitomiProbe_mut_2510	CTTCTGTAAATTTGCGATGTGGGTGGACGCGCCCCG	69.6503	69.9936	62.5732	55.7778
MitomiProbe_mut_2511	CTTCTGTAAATTTGCGCAGTGGGTGGACGCGCCCCG	79.0983	76.1546	67.9429	55.306
MitomiProbe_mut_2512	CTTCTGTAAATTTGCGCCGTGGGTGGACGCGCCCCG	80.6744	75.2281	54.7025	53.2012
MitomiProbe_mut_2513	CTTCTGTAAATTTGCGCGGTGGGTGGACGCGCCCCG	94.3592	72.5501	73.7957	56.822
MitomiProbe_mut_2514	CTTCTGTAAATTTGCGCTGTGGGTGGACGCGCCCCG	74.6325	72.0063	75.8671	47.6303
MitomiProbe_mut_2515	CTTCTGTAAATTTGCGGAGTGGGTGGACGCGCCCCG	81.6907	72.1554	63.8958	42.8902
MitomiProbe_mut_2516	CTTCTGTAAATTTGCGGCGTGGGTGGACGCGCCCCG	76.8393	78.5371	59.177	48.9677
MitomiProbe_mut_2517	CTTCTGTAAATTTGCGGGGTGGGTGGACGCGCCCCG	78.8767	72.4607	70.3166	55.4966
MitomiProbe_mut_2518	CTTCTGTAAATTTGCGGTGTGGGTGGACGCGCCCCG	73.7926	72.0479	80.6978	54.4508
MitomiProbe_mut_2519	CTTCTGTAAATTTGCGTAGTGGGTGGACGCGCCCCG	79.7384	74.6504	61.6356	58.5139
MitomiProbe_mut_252	AAAGCGGTAATTTGTCACCTTACTTCACATATCTAT	89.1021	96.1633	94.0576	81.2121
MitomiProbe_mut_2520	CTTCTGTAAATTTGCGTCGTGGGTGGACGCGCCCCG	81.6706	68.7984	77.7488	53.3022
MitomiProbe_mut_2521	CTTCTGTAAATTTGCGTGGTGGGTGGACGCGCCCCG	74.0014	95.2122	56.7019	65.9295
MitomiProbe_mut_2522	CTTCTGTAAATTTGCGTTGTGGGTGGACGCGCCCCG	88.1324	89.6964	69.7252	59.9856
MitomiProbe_mut_2523	CTTCTGTAAATTTGCTAAGTGGGTGGACGCGCCCCG	86.7742	85.7636	72.6766	63.6688
MitomiProbe_mut_2524	CTTCTGTAAATTTGCTACGTGGGTGGACGCGCCCCG	93.087	78.32	65.0965	47.6745
MitomiProbe_mut_2525	CTTCTGTAAATTTGCTAGGTGGGTGGACGCGCCCCG	86.8328	72.5439	64.8057	61.6854
MitomiProbe_mut_2526	CTTCTGTAAATTTGCTATGTGGGTGGACGCGCCCCG	80.4375	73.1941	75.2603	64.5583
MitomiProbe_mut_2527	CTTCTGTAAATTTGCTCAGTGGGTGGACGCGCCCCG	83.1839	70.3031	68.3179	48.0957
MitomiProbe_mut_2528	CTTCTGTAAATTTGCTCCGTGGGTGGACGCGCCCCG	82.9171	98.7769	64.7005	51.4842
MitomiProbe_mut_2529	CTTCTGTAAATTTGCTCGGTGGGTGGACGCGCCCCG	91.8014	92.1139	73.5753	64.4455
MitomiProbe_mut_253	AAAGCGGTAATTTGTCACGAAACTTCACATATCTAT	104.743	107.096	108.297	89.1288
MitomiProbe_mut_2530	CTTCTGTAAATTTGCTCTGTGGGTGGACGCGCCCCG	78.3313	88.2875	72.4211	69.6587
MitomiProbe_mut_2531	CTTCTGTAAATTTGCTGAGTGGGTGGACGCGCCCCG	95.299	99.5253	87.7353	67.5746
MitomiProbe_mut_2532	CTTCTGTAAATTTGCTGCGTGGGTGGACGCGCCCCG	80.2107	82.0283	71.6164	48.267
MitomiProbe_mut_2533	CTTCTGTAAATTTGCTGGGTGGGTGGACGCGCCCCG	87.294	80.3882	68.9879	56.4762
MitomiProbe_mut_2534	CTTCTGTAAATTTGCTGTGTGGGTGGACGCGCCCCG	90.3284	87.8563	62.0806	61.3344
MitomiProbe_mut_2535	CTTCTGTAAATTTGCTTAGTGGGTGGACGCGCCCCG	70.3045	65.1264	52.5694	62.7281
MitomiProbe_mut_2536	CTTCTGTAAATTTGCTTCGTGGGTGGACGCGCCCCG	84.9652	95.8579	64.0547	52.0203
MitomiProbe_mut_2537	CTTCTGTAAATTTGCTTGGTGGGTGGACGCGCCCCG	92.0534	71.2559	64.7479	60.471
MitomiProbe_mut_2538	CTTCTGTAAATTTGCTTTGTGGGTGGACGCGCCCCG	67.942	89.9159	85.6711	63.0793
MitomiProbe_mut_2539	CTTCTGTAAATTTGGAAAGTGGGTGGACGCGCCCCG	69.2217	67.6037	72.9078	52.429
MitomiProbe_mut_254	AAAGCGGTAATTTGTCACGACACTTCACATATCTAT	325.934	235.265	275.923	159.899
MitomiProbe_mut_2540	CTTCTGTAAATTTGGAACGTGGGTGGACGCGCCCCG	66.6785	84.9052	75.874	61.0389
MitomiProbe_mut_2541	CTTCTGTAAATTTGGAAGGTGGGTGGACGCGCCCCG	72.6527	75.6372	58.6202	55.7804
MitomiProbe_mut_2542	CTTCTGTAAATTTGGAATGTGGGTGGACGCGCCCCG	88.8601	79.4915	72.9614	56.8333
MitomiProbe_mut_2543	CTTCTGTAAATTTGGACAGTGGGTGGACGCGCCCCG	71.3879	80.2113	72.4504	54.0187
MitomiProbe_mut_2544	CTTCTGTAAATTTGGACCGTGGGTGGACGCGCCCCG	76.2096	79.4538	67.0172	46.8397
MitomiProbe_mut_2545	CTTCTGTAAATTTGGACGGTGGGTGGACGCGCCCCG	65.1157	65.017	72.7679	58.3048
MitomiProbe_mut_2546	CTTCTGTAAATTTGGACTGTGGGTGGACGCGCCCCG	84.159	71.6623	72.5832	54.1897
MitomiProbe_mut_2547	CTTCTGTAAATTTGGAGAGTGGGTGGACGCGCCCCG	98.8177	78.9377	81.8604	53.2267
MitomiProbe_mut_2548	CTTCTGTAAATTTGGAGCGTGGGTGGACGCGCCCCG	71.5798	62.3943	58.1732	43.2564
MitomiProbe_mut_2549	CTTCTGTAAATTTGGAGGGTGGGTGGACGCGCCCCG	73.5745	56.3826	71.8317	46.836
MitomiProbe_mut_255	AAAGCGGTAATTTGTCACGAGACTTCACATATCTAT	1470.88	1541.47	1210.05	662.913
MitomiProbe_mut_2550	CTTCTGTAAATTTGGAGTGTGGGTGGACGCGCCCCG	76.4526	68.4519	82.3702	60.3896
MitomiProbe_mut_2551	CTTCTGTAAATTTGGATAGTGGGTGGACGCGCCCCG	85.0921	67.3693	77.4488	64.2246
MitomiProbe_mut_2552	CTTCTGTAAATTTGGATCGTGGGTGGACGCGCCCCG	83.8704	91.3504	66.2922	59.149
MitomiProbe_mut_2553	CTTCTGTAAATTTGGATGGTGGGTGGACGCGCCCCG	101.012	75.8492	73.7367	62.4371
MitomiProbe_mut_2554	CTTCTGTAAATTTGGATTGTGGGTGGACGCGCCCCG	88.0977	77.9321	78.8789	55.2778
MitomiProbe_mut_2555	CTTCTGTAAATTTGGCAAGTGGGTGGACGCGCCCCG	82.26	67.9887	69.8077	69.5885
MitomiProbe_mut_2556	CTTCTGTAAATTTGGCACGTGGGTGGACGCGCCCCG	1291.22	592.249	128.123	74.5697
MitomiProbe_mut_2557	CTTCTGTAAATTTGGCACGTGTTTTGACGCGCCCCG	1859.51	1093.34	224.728	112.238
MitomiProbe_mut_2558	CTTCTGTAAATTTGGCAGGTGGGTGGACGCGCCCCG	80.3579	78.5525	63.4181	51.3935
MitomiProbe_mut_2559	CTTCTGTAAATTTGGCATGTGGGTGGACGCGCCCCG	99.9448	87.8462	82.0904	53.6736
MitomiProbe_mut_256	AAAGCGGTAATTTGTCACGATACTTCACATATCTAT	249.278	304.791	212.68	166.344
MitomiProbe_mut_2560	CTTCTGTAAATTTGGCCAGTGGGTGGACGCGCCCCG	59.8418	65.9138	65.5794	58.7623
MitomiProbe_mut_2561	CTTCTGTAAATTTGGCCCGTGGGTGGACGCGCCCCG	62.5506	72.4869	64.5356	61.3117
MitomiProbe_mut_2562	CTTCTGTAAATTTGGCCGGTGGGTGGACGCGCCCCG	59.2185	63.4983	57.0858	51.0231
MitomiProbe_mut_2563	CTTCTGTAAATTTGGCCTGTGGGTGGACGCGCCCCG	74.1365	76.6739	57.6236	59.791
MitomiProbe_mut_2564	CTTCTGTAAATTTGGCGAGTGGGTGGACGCGCCCCG	85.8513	86.9258	69.4241	49.5683
MitomiProbe_mut_2565	CTTCTGTAAATTTGGCGCGTGGGTGGACGCGCCCCG	75.128	63.7444	66.5507	47.8457
MitomiProbe_mut_2566	CTTCTGTAAATTTGGCGGGTGGGTGGACGCGCCCCG	75.4542	68.4803	69.5633	60.5837
MitomiProbe_mut_2567	CTTCTGTAAATTTGGCGTGTGGGTGGACGCGCCCCG	84.2317	76.4239	75.2537	41.7377
MitomiProbe_mut_2568	CTTCTGTAAATTTGGCTAGTGGGTGGACGCGCCCCG	73.4386	80.5765	68.1856	53.1774
MitomiProbe_mut_2569	CTTCTGTAAATTTGGCTCGTGGGTGGACGCGCCCCG	111.292	91.9976	73.9408	52.023
MitomiProbe_mut_257	AAAGCGGTAATTTGTCACGCAACTTCACATATCTAT	128.027	140.249	130.484	103.638
MitomiProbe_mut_2570	CTTCTGTAAATTTGGCTGGTGGGTGGACGCGCCCCG	97.3194	78.6751	80.7188	59.3893
MitomiProbe_mut_2571	CTTCTGTAAATTTGGCTTGTGGGTGGACGCGCCCCG	92.3737	94.9391	77.9301	43.2196
MitomiProbe_mut_2572	CTTCTGTAAATTTGGGAAGTGGGTGGACGCGCCCCG	82.3631	76.5947	67.534	56.9979
MitomiProbe_mut_2573	CTTCTGTAAATTTGGGACGTGGGTGGACGCGCCCCG	92.2301	88.3601	69.0945	44.9935
MitomiProbe_mut_2574	CTTCTGTAAATTTGGGAGGTGGGTGGACGCGCCCCG	81.2161	69.3208	56.6107	56.7079
MitomiProbe_mut_2575	CTTCTGTAAATTTGGGATGTGGGTGGACGCGCCCCG	80.5561	85.4129	84.5725	63.2944
MitomiProbe_mut_2576	CTTCTGTAAATTTGGGCAGTGGGTGGACGCGCCCCG	90.6857	71.77	67.5946	55.2961
MitomiProbe_mut_2577	CTTCTGTAAATTTGGGCCGTGGGTGGACGCGCCCCG	92.925	64.2287	67.7833	60.3381
MitomiProbe_mut_2578	CTTCTGTAAATTTGGGCGGTGGGTGGACGCGCCCCG	71.4843	68.8256	69.1398	48.9537
MitomiProbe_mut_2579	CTTCTGTAAATTTGGGCTGTGGGTGGACGCGCCCCG	76.4132	80.7848	69.3444	58.5092
MitomiProbe_mut_258	AAAGCGGTAATTTGTCACGCCACTTCACATATCTAT	308.229	303.225	300.698	209.383
MitomiProbe_mut_2580	CTTCTGTAAATTTGGGGAGTGGGTGGACGCGCCCCG	73.9491	81.0326	62.7191	68.3073
MitomiProbe_mut_2581	CTTCTGTAAATTTGGGGCGTGGGTGGACGCGCCCCG	88.3511	84.2882	69.1791	59.2912
MitomiProbe_mut_2582	CTTCTGTAAATTTGGGGGGTGGGTGGACGCGCCCCG	103.131	110.396	108.482	56.4058
MitomiProbe_mut_2583	CTTCTGTAAATTTGGGGTGTGGGTGGACGCGCCCCG	78.4444	76.3852	65.3738	48.1039
MitomiProbe_mut_2584	CTTCTGTAAATTTGGGTAGTGGGTGGACGCGCCCCG	85.8137	83.1724	71.867	55.2416
MitomiProbe_mut_2585	CTTCTGTAAATTTGGGTCGTGGGTGGACGCGCCCCG	61.56	73.2286	71.5414	54.0825
MitomiProbe_mut_2586	CTTCTGTAAATTTGGGTGGTGGGTGGACGCGCCCCG	74.1682	91.2146	75.567	67.76
MitomiProbe_mut_2587	CTTCTGTAAATTTGGGTTGTGGGTGGACGCGCCCCG	91.4603	78.561	63.8961	53.0839
MitomiProbe_mut_2588	CTTCTGTAAATTTGGTAAGTGGGTGGACGCGCCCCG	85.5728	65.5881	71.5713	76.1342
MitomiProbe_mut_2589	CTTCTGTAAATTTGGTACGTGGGTGGACGCGCCCCG	94.7634	64.5344	86.5344	47.4292
MitomiProbe_mut_259	AAAGCGGTAATTTGTCACGCGACTTCACATATCTAT	885.071	688	650.542	309.186
MitomiProbe_mut_2590	CTTCTGTAAATTTGGTAGGTGGGTGGACGCGCCCCG	72.5122	72.82	65.8361	59.2011
MitomiProbe_mut_2591	CTTCTGTAAATTTGGTATGTGGGTGGACGCGCCCCG	91.8501	81.9706	76.5238	58.2133
MitomiProbe_mut_2592	CTTCTGTAAATTTGGTCAGTGGGTGGACGCGCCCCG	86.2452	66.9842	63.8097	61.3632
MitomiProbe_mut_2593	CTTCTGTAAATTTGGTCCGTGGGTGGACGCGCCCCG	72.3895	72.4167	60.0099	47.6864
MitomiProbe_mut_2594	CTTCTGTAAATTTGGTCGGTGGGTGGACGCGCCCCG	77.9192	74.6084	78.1684	56.3533
MitomiProbe_mut_2595	CTTCTGTAAATTTGGTCTGTGGGTGGACGCGCCCCG	87.5998	96.8189	75.3871	64.873
MitomiProbe_mut_2596	CTTCTGTAAATTTGGTGAGTGGGTGGACGCGCCCCG	81.6529	73.185	75.6157	58.3831
MitomiProbe_mut_2597	CTTCTGTAAATTTGGTGCGTGGGTGGACGCGCCCCG	68.3055	66.36	72.799	59.9429
MitomiProbe_mut_2598	CTTCTGTAAATTTGGTGGGTGGGTGGACGCGCCCCG	104.301	72.4233	69.2444	56.2865
MitomiProbe_mut_2599	CTTCTGTAAATTTGGTGTGTGGGTGGACGCGCCCCG	89.431	88.0098	66.9341	59.6121
MitomiProbe_mut_26	AAAGCGGTAATTTGACACGTGGGTGCAGATATCTAT	1503.82	574.234	191.4	81.9354
MitomiProbe_mut_260	AAAGCGGTAATTTGTCACGCTACTTCACATATCTAT	279.942	251.672	270.688	141.71
MitomiProbe_mut_2600	CTTCTGTAAATTTGGTTAGTGGGTGGACGCGCCCCG	77.3879	73.0394	81.9406	66.08
MitomiProbe_mut_2601	CTTCTGTAAATTTGGTTCGTGGGTGGACGCGCCCCG	87.4209	70.7751	61.7473	55.2189
MitomiProbe_mut_2602	CTTCTGTAAATTTGGTTGGTGGGTGGACGCGCCCCG	85.2784	87.3364	81.381	60.9553
MitomiProbe_mut_2603	CTTCTGTAAATTTGGTTTGTGGGTGGACGCGCCCCG	91.1184	93.3751	86.9783	67.3853
MitomiProbe_mut_2604	CTTCTGTAAATTTGTAAAGTGGGTGGACGCGCCCCG	86.4793	94.2011	75.279	53.9722
MitomiProbe_mut_2605	CTTCTGTAAATTTGTAACGTGGGTGGACGCGCCCCG	86.2213	84.8067	71.1583	48.0671
MitomiProbe_mut_2606	CTTCTGTAAATTTGTAAGGTGGGTGGACGCGCCCCG	83.072	74.6048	58.369	61.6825
MitomiProbe_mut_2607	CTTCTGTAAATTTGTAATGTGGGTGGACGCGCCCCG	79.1227	74.6992	81.9665	63.8266
MitomiProbe_mut_2608	CTTCTGTAAATTTGTACAGTGGGTGGACGCGCCCCG	98.7623	82.0423	85.5577	69.6468
MitomiProbe_mut_2609	CTTCTGTAAATTTGTACCGTGGGTGGACGCGCCCCG	77.3864	82.1758	81.4225	52.9941
MitomiProbe_mut_261	AAAGCGGTAATTTGTCACGGAACTTCACATATCTAT	88.8991	100.053	100.568	87.1425
MitomiProbe_mut_2610	CTTCTGTAAATTTGTACGGTGGGTGGACGCGCCCCG	74.0992	69.1629	72.8992	62.9294
MitomiProbe_mut_2611	CTTCTGTAAATTTGTACTGTGGGTGGACGCGCCCCG	80.3178	83.9823	70.7295	54.9892
MitomiProbe_mut_2612	CTTCTGTAAATTTGTAGAGTGGGTGGACGCGCCCCG	88.9678	69.9886	79.6412	54.2254
MitomiProbe_mut_2613	CTTCTGTAAATTTGTAGCGTGGGTGGACGCGCCCCG	80.6842	90.2502	70.1842	48.7284
MitomiProbe_mut_2614	CTTCTGTAAATTTGTAGGGTGGGTGGACGCGCCCCG	82.6571	85.216	66.3235	63.4694
MitomiProbe_mut_2615	CTTCTGTAAATTTGTAGTGTGGGTGGACGCGCCCCG	83.6906	78.7579	72.025	57.4773
MitomiProbe_mut_2616	CTTCTGTAAATTTGTATAGTGGGTGGACGCGCCCCG	71.9643	77.4404	64.5696	58.0052
MitomiProbe_mut_2617	CTTCTGTAAATTTGTATCGTGGGTGGACGCGCCCCG	90.6528	73.1351	75.8604	51.5896
MitomiProbe_mut_2618	CTTCTGTAAATTTGTATGGTGGGTGGACGCGCCCCG	105.251	93.45	54.2766	59.9498
MitomiProbe_mut_2619	CTTCTGTAAATTTGTATTGTGGGTGGACGCGCCCCG	93.3166	92.8232	77.7915	68.7733
MitomiProbe_mut_262	AAAGCGGTAATTTGTCACGGCACTTCACATATCTAT	124.034	102.729	106.298	80.1056
MitomiProbe_mut_2620	CTTCTGTAAATTTGTCAAGTGGGTGGACGCGCCCCG	81.565	87.4401	74.7879	59.8405
MitomiProbe_mut_2621	CTTCTGTAAATTTGTCACAAAACTTGACGCGCCCCG	102.25	92.5442	81.7807	69.4815
MitomiProbe_mut_2622	CTTCTGTAAATTTGTCACAACACTTGACGCGCCCCG	100.406	125.676	95.9239	104.075
MitomiProbe_mut_2623	CTTCTGTAAATTTGTCACAAGACTTGACGCGCCCCG	143.353	137.666	140.676	131.158
MitomiProbe_mut_2624	CTTCTGTAAATTTGTCACAATACTTGACGCGCCCCG	108.406	97.2435	96.2324	77.3329
MitomiProbe_mut_2625	CTTCTGTAAATTTGTCACACAACTTGACGCGCCCCG	92	93.9081	80.4137	71.822
MitomiProbe_mut_2626	CTTCTGTAAATTTGTCACACCACTTGACGCGCCCCG	142.26	148.126	125.78	112.815
MitomiProbe_mut_2627	CTTCTGTAAATTTGTCACACGACTTGACGCGCCCCG	129.83	141.573	101.527	73.191
MitomiProbe_mut_2628	CTTCTGTAAATTTGTCACACTACTTGACGCGCCCCG	132.362	126.345	108.737	85.9701
MitomiProbe_mut_2629	CTTCTGTAAATTTGTCACAGAACTTGACGCGCCCCG	85.9638	80.976	79.4488	64.6071
MitomiProbe_mut_263	AAAGCGGTAATTTGTCACGGGACTTCACATATCTAT	1652.43	1573.3	1564.28	1164.36
MitomiProbe_mut_2630	CTTCTGTAAATTTGTCACAGCACTTGACGCGCCCCG	87.8612	82.6985	75.0044	61.1099
MitomiProbe_mut_2631	CTTCTGTAAATTTGTCACAGGACTTGACGCGCCCCG	104.825	109.744	85.5507	89.1087
MitomiProbe_mut_2632	CTTCTGTAAATTTGTCACAGTACTTGACGCGCCCCG	74.59	84.8558	68.1245	67.7806
MitomiProbe_mut_2633	CTTCTGTAAATTTGTCACATAACTTGACGCGCCCCG	85.5231	96.3048	82.4894	60.9173
MitomiProbe_mut_2634	CTTCTGTAAATTTGTCACATCACTTGACGCGCCCCG	111.334	128.467	130.417	109.514
MitomiProbe_mut_2635	CTTCTGTAAATTTGTCACATGACTTGACGCGCCCCG	2638.32	4408.47	2489.93	2656.78
MitomiProbe_mut_2636	CTTCTGTAAATTTGTCACATTACTTGACGCGCCCCG	135.835	114.34	110.851	94.9813
MitomiProbe_mut_2637	CTTCTGTAAATTTGTCACCAAACTTGACGCGCCCCG	95.57	70.5292	75.3735	70.6437
MitomiProbe_mut_2638	CTTCTGTAAATTTGTCACCACACTTGACGCGCCCCG	81.1933	87.1197	88.0235	66.8656
MitomiProbe_mut_2639	CTTCTGTAAATTTGTCACCAGACTTGACGCGCCCCG	90.4128	86.7877	68.5971	66.4322
MitomiProbe_mut_264	AAAGCGGTAATTTGTCACGGTACTTCACATATCTAT	206.656	256.645	202.051	194.769
MitomiProbe_mut_2640	CTTCTGTAAATTTGTCACCATACTTGACGCGCCCCG	103.365	83.7024	74.4012	62.9972
MitomiProbe_mut_2641	CTTCTGTAAATTTGTCACCCAACTTGACGCGCCCCG	91.3849	73.9548	64.2273	66.0265
MitomiProbe_mut_2642	CTTCTGTAAATTTGTCACCCCACTTGACGCGCCCCG	92.8769	91.7767	77.0585	62.6451
MitomiProbe_mut_2643	CTTCTGTAAATTTGTCACCCGACTTGACGCGCCCCG	94.2426	74.6011	80.6964	68.942
MitomiProbe_mut_2644	CTTCTGTAAATTTGTCACCCTACTTGACGCGCCCCG	93.1649	89.0202	93.1725	61.6825
MitomiProbe_mut_2645	CTTCTGTAAATTTGTCACCGAACTTGACGCGCCCCG	77.7366	82.5369	76.0931	69.4307
MitomiProbe_mut_2646	CTTCTGTAAATTTGTCACCGCACTTGACGCGCCCCG	78.3592	96.481	75.0856	58.5031
MitomiProbe_mut_2647	CTTCTGTAAATTTGTCACCGGACTTGACGCGCCCCG	113.424	96.7	83.4302	71.1875
MitomiProbe_mut_2648	CTTCTGTAAATTTGTCACCGTACTTGACGCGCCCCG	87.4474	82.9878	77.324	66.412
MitomiProbe_mut_2649	CTTCTGTAAATTTGTCACCTAACTTGACGCGCCCCG	76.2183	88.2623	78.7294	67.9212
MitomiProbe_mut_265	AAAGCGGTAATTTGTCACGTAACTTCACATATCTAT	148.923	153.744	129.955	133.077
MitomiProbe_mut_2650	CTTCTGTAAATTTGTCACCTCACTTGACGCGCCCCG	88.2286	77.4765	67.9689	56.9167
MitomiProbe_mut_2651	CTTCTGTAAATTTGTCACCTGACTTGACGCGCCCCG	1604.98	1823.98	1355.39	1813.07
MitomiProbe_mut_2652	CTTCTGTAAATTTGTCACCTTACTTGACGCGCCCCG	86.7853	66.8498	84.2168	75.2518
MitomiProbe_mut_2653	CTTCTGTAAATTTGTCACGAAACTTGACGCGCCCCG	88.0198	97.1378	85.615	64.9697
MitomiProbe_mut_2654	CTTCTGTAAATTTGTCACGACACTTGACGCGCCCCG	251.953	248.423	200.607	134.764
MitomiProbe_mut_2655	CTTCTGTAAATTTGTCACGAGACTTGACGCGCCCCG	937.841	1142.34	802.043	518.73
MitomiProbe_mut_2656	CTTCTGTAAATTTGTCACGATACTTGACGCGCCCCG	282.75	273.371	219.834	155.699
MitomiProbe_mut_2657	CTTCTGTAAATTTGTCACGCAACTTGACGCGCCCCG	142.59	133.126	109.708	83.0023
MitomiProbe_mut_2658	CTTCTGTAAATTTGTCACGCCACTTGACGCGCCCCG	315.531	271.132	260.245	150.484
MitomiProbe_mut_2659	CTTCTGTAAATTTGTCACGCGACTTGACGCGCCCCG	765.246	459.109	459.355	241.024
MitomiProbe_mut_266	AAAGCGGTAATTTGTCACGTCACTTCACATATCTAT	123.004	132.751	117.362	103.997
MitomiProbe_mut_2660	CTTCTGTAAATTTGTCACGCTACTTGACGCGCCCCG	280.141	196.011	202.9	125.749
MitomiProbe_mut_2661	CTTCTGTAAATTTGTCACGGAACTTGACGCGCCCCG	83.4302	93.9923	86.8878	72.5113
MitomiProbe_mut_2662	CTTCTGTAAATTTGTCACGGCACTTGACGCGCCCCG	80.5195	131.431	89.2114	79.2101
MitomiProbe_mut_2663	CTTCTGTAAATTTGTCACGGGACTTGACGCGCCCCG	1062.93	1430.51	806.161	802.562
MitomiProbe_mut_2664	CTTCTGTAAATTTGTCACGGTACTTGACGCGCCCCG	192.876	172.666	158.875	189.143
MitomiProbe_mut_2665	CTTCTGTAAATTTGTCACGTAACTTGACGCGCCCCG	156.042	115.763	123.911	86.1631
MitomiProbe_mut_2666	CTTCTGTAAATTTGTCACGTCACTTGACGCGCCCCG	175.348	207.634	174.825	137.803
MitomiProbe_mut_2667	CTTCTGTAAATTTGTCACGTGACTTGACGCGCCCCG	23041.3	29915	35041.9	25816.6
MitomiProbe_mut_2668	CTTCTGTAAATTTGTCACGTGGGTGGACGCGCCCCG	4603.45	3564.21	684.859	162.158
MitomiProbe_mut_2669	CTTCTGTAAATTTGTCACGTGTTTTGACGCGCCCCG	4700.05	4194.09	2424	670.288
MitomiProbe_mut_267	AAAGCGGTAATTTGTCACGTGACTTCACATATCTAT	29997.5	35977	44352.1	28849.5
MitomiProbe_mut_2670	CTTCTGTAAATTTGTCACGTTACTTGACGCGCCCCG	950.045	880.859	623.328	304.473
MitomiProbe_mut_2671	CTTCTGTAAATTTGTCACTAAACTTGACGCGCCCCG	94.5609	76.6854	69.7286	72.307
MitomiProbe_mut_2672	CTTCTGTAAATTTGTCACTACACTTGACGCGCCCCG	88.9192	90.2361	84.882	73.248
MitomiProbe_mut_2673	CTTCTGTAAATTTGTCACTAGACTTGACGCGCCCCG	93.8703	89.9271	76.1527	69.7917
MitomiProbe_mut_2674	CTTCTGTAAATTTGTCACTATACTTGACGCGCCCCG	92.6134	89.4374	72.8889	68.1159
MitomiProbe_mut_2675	CTTCTGTAAATTTGTCACTCAACTTGACGCGCCCCG	73.975	81.6908	71.4379	71.0147
MitomiProbe_mut_2676	CTTCTGTAAATTTGTCACTCCACTTGACGCGCCCCG	99.4438	81.2573	77.8861	65.5361
MitomiProbe_mut_2677	CTTCTGTAAATTTGTCACTCGACTTGACGCGCCCCG	74.4792	75.8143	77.2434	66.4858
MitomiProbe_mut_2678	CTTCTGTAAATTTGTCACTCTACTTGACGCGCCCCG	79.7371	80.8462	58.7489	63.969
MitomiProbe_mut_2679	CTTCTGTAAATTTGTCACTGAACTTGACGCGCCCCG	65.9775	71.6066	60.5353	65.2192
MitomiProbe_mut_268	AAAGCGGTAATTTGTCACGTGGGTGCAGATATCTAT	8064.34	3175.52	1035.9	283.216
MitomiProbe_mut_2680	CTTCTGTAAATTTGTCACTGCACTTGACGCGCCCCG	92.9381	81.2309	73.8975	69.8191
MitomiProbe_mut_2681	CTTCTGTAAATTTGTCACTGGACTTGACGCGCCCCG	97.691	88.7571	98.329	91.3965
MitomiProbe_mut_2682	CTTCTGTAAATTTGTCACTGTACTTGACGCGCCCCG	72.0145	69.7999	75.6426	70.0236
MitomiProbe_mut_2683	CTTCTGTAAATTTGTCACTTAACTTGACGCGCCCCG	82.7847	84.3814	79.7802	81.5014
MitomiProbe_mut_2684	CTTCTGTAAATTTGTCACTTCACTTGACGCGCCCCG	95.6016	66.3971	78.9933	86.165
MitomiProbe_mut_2685	CTTCTGTAAATTTGTCACTTGACTTGACGCGCCCCG	192.537	202.683	179.375	190.728
MitomiProbe_mut_2686	CTTCTGTAAATTTGTCACTTTACTTGACGCGCCCCG	93.4932	109.806	74.8322	70.7779
MitomiProbe_mut_2687	CTTCTGTAAATTTGTCAGGTGGGTGGACGCGCCCCG	148.105	126.184	114.311	88.2378
MitomiProbe_mut_2688	CTTCTGTAAATTTGTCATGTGGGTGGACGCGCCCCG	158.55	158.194	115.296	71.2849
MitomiProbe_mut_2689	CTTCTGTAAATTTGTCCAGTGGGTGGACGCGCCCCG	79.0381	74.7575	68.8129	64.8937
MitomiProbe_mut_269	AAAGCGGTAATTTGTCACGTGTTTTCACATATCTAT	7815.26	6078.74	3814.94	910.296
MitomiProbe_mut_2690	CTTCTGTAAATTTGTCCCGTGGGTGGACGCGCCCCG	118.527	94.0359	80.3233	61.6228
MitomiProbe_mut_2691	CTTCTGTAAATTTGTCCGGTGGGTGGACGCGCCCCG	85.2352	77.2374	81.8919	48.5692
MitomiProbe_mut_2692	CTTCTGTAAATTTGTCCTGTGGGTGGACGCGCCCCG	78.0021	77.1695	65.2048	56.2574
MitomiProbe_mut_2693	CTTCTGTAAATTTGTCGAGTGGGTGGACGCGCCCCG	62.9598	71.0136	80.6109	54.2152
MitomiProbe_mut_2694	CTTCTGTAAATTTGTCGCGTGGGTGGACGCGCCCCG	96.9598	90.9826	72.4009	57.7702
MitomiProbe_mut_2695	CTTCTGTAAATTTGTCGGGTGGGTGGACGCGCCCCG	69.2853	84.6892	76.0658	55.2781
MitomiProbe_mut_2696	CTTCTGTAAATTTGTCGTGTGGGTGGACGCGCCCCG	68.215	76.4978	63.0737	54.1243
MitomiProbe_mut_2697	CTTCTGTAAATTTGTCTAGTGGGTGGACGCGCCCCG	82.1376	70.4583	81.0057	51.2605
MitomiProbe_mut_2698	CTTCTGTAAATTTGTCTCGTGGGTGGACGCGCCCCG	86.8969	95.7703	66.9877	64.9189
MitomiProbe_mut_2699	CTTCTGTAAATTTGTCTGGTGGGTGGACGCGCCCCG	104.08	63.7786	74.0278	54.1497
MitomiProbe_mut_27	AAAGCGGTAATTTGACACGTGTTTTCACATATCTAT	2054.02	1122.84	346.258	108.865
MitomiProbe_mut_270	AAAGCGGTAATTTGTCACGTTACTTCACATATCTAT	865.562	1192.61	502.6	418.062
MitomiProbe_mut_2700	CTTCTGTAAATTTGTCTTGTGGGTGGACGCGCCCCG	85.0259	84.5196	73.1093	64.7667
MitomiProbe_mut_2701	CTTCTGTAAATTTGTGAAGTGGGTGGACGCGCCCCG	83.061	66.9069	79.5648	56.186
MitomiProbe_mut_2702	CTTCTGTAAATTTGTGACGTGGGTGGACGCGCCCCG	82.442	82.4744	64.0612	58.8648
MitomiProbe_mut_2703	CTTCTGTAAATTTGTGAGGTGGGTGGACGCGCCCCG	112.916	89.2516	68.7588	55.6193
MitomiProbe_mut_2704	CTTCTGTAAATTTGTGATGTGGGTGGACGCGCCCCG	68.3564	81.9058	74.5929	65.241
MitomiProbe_mut_2705	CTTCTGTAAATTTGTGCAGTGGGTGGACGCGCCCCG	81.3394	83.5077	66.6388	53.751
MitomiProbe_mut_2706	CTTCTGTAAATTTGTGCCGTGGGTGGACGCGCCCCG	81.1628	71.286	72.3116	66.4047
MitomiProbe_mut_2707	CTTCTGTAAATTTGTGCGGTGGGTGGACGCGCCCCG	84.861	89.284	76.1552	60.5109
MitomiProbe_mut_2708	CTTCTGTAAATTTGTGCTGTGGGTGGACGCGCCCCG	89.7736	74.1728	80.1106	56.5205
MitomiProbe_mut_2709	CTTCTGTAAATTTGTGGAGTGGGTGGACGCGCCCCG	82.5481	81.4778	73.3684	60.6452
MitomiProbe_mut_271	AAAGCGGTAATTTGTCACTAAACTTCACATATCTAT	87.5275	91.0071	79.642	93.6572
MitomiProbe_mut_2710	CTTCTGTAAATTTGTGGCGTGGGTGGACGCGCCCCG	77.869	77.5172	68.7378	50.7473
MitomiProbe_mut_2711	CTTCTGTAAATTTGTGGGGTGGGTGGACGCGCCCCG	96.0043	83.5258	79.9718	60.793
MitomiProbe_mut_2712	CTTCTGTAAATTTGTGGTGTGGGTGGACGCGCCCCG	86.8457	83.8786	78.4225	55.2008
MitomiProbe_mut_2713	CTTCTGTAAATTTGTGTAGTGGGTGGACGCGCCCCG	105.273	97.6654	75.9277	69.9692
MitomiProbe_mut_2714	CTTCTGTAAATTTGTGTCGTGGGTGGACGCGCCCCG	72.2115	83.5591	78.0528	53.3853
MitomiProbe_mut_2715	CTTCTGTAAATTTGTGTGGTGGGTGGACGCGCCCCG	80.5551	88.2974	65.367	56.4952
MitomiProbe_mut_2716	CTTCTGTAAATTTGTGTTGTGGGTGGACGCGCCCCG	93.1812	92.9159	87.4777	74.8258
MitomiProbe_mut_2717	CTTCTGTAAATTTGTTAAGTGGGTGGACGCGCCCCG	84.1694	74.2566	73.5903	49.026
MitomiProbe_mut_2718	CTTCTGTAAATTTGTTACGTGGGTGGACGCGCCCCG	74.29	72.1536	62.3204	55.406
MitomiProbe_mut_2719	CTTCTGTAAATTTGTTAGGTGGGTGGACGCGCCCCG	96.8415	76.9062	74.3962	57.2389
MitomiProbe_mut_272	AAAGCGGTAATTTGTCACTACACTTCACATATCTAT	98.6471	109.02	95.7002	78.5025
MitomiProbe_mut_2720	CTTCTGTAAATTTGTTATGTGGGTGGACGCGCCCCG	88.1959	81.7735	82.7468	60.5105
MitomiProbe_mut_2721	CTTCTGTAAATTTGTTCAGTGGGTGGACGCGCCCCG	86.9235	60.0985	73.3497	54.1558
MitomiProbe_mut_2722	CTTCTGTAAATTTGTTCCGTGGGTGGACGCGCCCCG	73.6218	99.9822	80.7529	53.0434
MitomiProbe_mut_2723	CTTCTGTAAATTTGTTCGGTGGGTGGACGCGCCCCG	81.1746	73.3782	75.2078	60.4119
MitomiProbe_mut_2724	CTTCTGTAAATTTGTTCTGTGGGTGGACGCGCCCCG	81.3737	83.4008	69.9886	70.0674
MitomiProbe_mut_2725	CTTCTGTAAATTTGTTGAGTGGGTGGACGCGCCCCG	83.1534	100.139	69.4448	68.7141
MitomiProbe_mut_2726	CTTCTGTAAATTTGTTGCGTGGGTGGACGCGCCCCG	72.0636	70.3359	71.7988	60.6806
MitomiProbe_mut_2727	CTTCTGTAAATTTGTTGGGTGGGTGGACGCGCCCCG	81.2305	90.3088	81.2179	51.8852
MitomiProbe_mut_2728	CTTCTGTAAATTTGTTGTGTGGGTGGACGCGCCCCG	103.362	104.066	87.4567	92.6652
MitomiProbe_mut_2729	CTTCTGTAAATTTGTTTAGTGGGTGGACGCGCCCCG	80.9186	75.762	75.153	60.3565
MitomiProbe_mut_273	AAAGCGGTAATTTGTCACTAGACTTCACATATCTAT	104.702	87.4252	89.5676	90.8311
MitomiProbe_mut_2730	CTTCTGTAAATTTGTTTCGTGGGTGGACGCGCCCCG	79.6074	71.8963	76.111	60.9481
MitomiProbe_mut_2731	CTTCTGTAAATTTGTTTGGTGGGTGGACGCGCCCCG	87.5936	74.7616	84.5103	65.0857
MitomiProbe_mut_2732	CTTCTGTAAATTTGTTTTGTGGGTGGACGCGCCCCG	78.8651	84.0949	86.9539	68.5007
MitomiProbe_mut_2733	CTTCTGTAAATTTTACACGTGTTTTGACGCGCCCCG	1005.8	632.537	241.789	103.979
MitomiProbe_mut_2734	CTTCTGTAAATTTTCCACGTGTTTTGACGCGCCCCG	737.174	406.642	163.638	92.3514
MitomiProbe_mut_2735	CTTCTGTAAATTTTGCACGTGTTTTGACGCGCCCCG	1365.02	1226.15	250.901	91.8651
MitomiProbe_mut_2736	CTTCTGTAAATTTTTCACGTGAAATGACGCGCCCCG	736.194	527.788	458	242.688
MitomiProbe_mut_2737	CTTCTGTAAATTTTTCACGTGAACTGACGCGCCCCG	824.599	916.979	587.566	317.903
MitomiProbe_mut_2738	CTTCTGTAAATTTTTCACGTGAAGTGAAGCGCCCCG	604.442	682.333	440.549	247.872
MitomiProbe_mut_2739	CTTCTGTAAATTTTTCACGTGAATTGACGCGCCCCG	648.796	757.013	453.705	346.774
MitomiProbe_mut_274	AAAGCGGTAATTTGTCACTATACTTCACATATCTAT	81.8494	91.2655	84.0012	90.2565
MitomiProbe_mut_2740	CTTCTGTAAATTTTTCACGTGACATGAAGCGCCCCG	4848.32	6695.17	5142.5	4500.89
MitomiProbe_mut_2741	CTTCTGTAAATTTTTCACGTGACCTGACGCGCCCCG	6903.01	8475.3	8687.47	6480
MitomiProbe_mut_2742	CTTCTGTAAATTTTTCACGTGACGTGAAGCGCCCCG	4389.41	5875.76	4753.42	2849.49
MitomiProbe_mut_2743	CTTCTGTAAATTTTTCACGTGACTTGACGCGCCCCG	6042.34	7555.54	5513.71	3481.62
MitomiProbe_mut_2744	CTTCTGTAAATTTTTCACGTGAGATGACGCGCCCCG	831.595	596.617	625.721	228.95
MitomiProbe_mut_2745	CTTCTGTAAATTTTTCACGTGAGCTGAGGCGCCCCG	997.442	1005.99	725.907	333.153
MitomiProbe_mut_2746	CTTCTGTAAATTTTTCACGTGAGGTGAAGCGCCCCG	894.688	807.058	495.495	270.513
MitomiProbe_mut_2747	CTTCTGTAAATTTTTCACGTGAGTTGACGCGCCCCG	973.477	877.75	548.12	245.382
MitomiProbe_mut_2748	CTTCTGTAAATTTTTCACGTGATATGACGCGCCCCG	3467.62	2301.8	2561.98	952.107
MitomiProbe_mut_2749	CTTCTGTAAATTTTTCACGTGATCTGACGCGCCCCG	5021.27	5796.45	4732.83	3677.89
MitomiProbe_mut_275	AAAGCGGTAATTTGTCACTCAACTTCACATATCTAT	98.9423	83.6666	74.0097	78.6617
MitomiProbe_mut_2750	CTTCTGTAAATTTTTCACGTGATGTGAAGCGCCCCG	2914.96	3735.65	3029.23	1851.02
MitomiProbe_mut_2751	CTTCTGTAAATTTTTCACGTGATTTGACGCGCCCCG	4111.18	4239.39	3754.6	2583.54
MitomiProbe_mut_2752	CTTCTGTAAATTTTTCACGTGCAATGACGCGCCCCG	952.888	620.418	403.775	144.103
MitomiProbe_mut_2753	CTTCTGTAAATTTTTCACGTGCACTGACGCGCCCCG	1043.27	739.434	366.697	127.486
MitomiProbe_mut_2754	CTTCTGTAAATTTTTCACGTGCAGTGAAGCGCCCCG	782.659	684.621	333.976	154.838
MitomiProbe_mut_2755	CTTCTGTAAATTTTTCACGTGCATTGACGCGCCCCG	878.581	671.689	319.349	132.478
MitomiProbe_mut_2756	CTTCTGTAAATTTTTCACGTGCCATGACGCGCCCCG	1183.81	927.464	350.736	141.674
MitomiProbe_mut_2757	CTTCTGTAAATTTTTCACGTGCCCTGACGCGCCCCG	935.188	580.293	304.86	102.347
MitomiProbe_mut_2758	CTTCTGTAAATTTTTCACGTGCCGTGAAGCGCCCCG	937.118	638.72	317.81	114.855
MitomiProbe_mut_2759	CTTCTGTAAATTTTTCACGTGCCTTGACGCGCCCCG	952.826	653.899	283.644	121.893
MitomiProbe_mut_276	AAAGCGGTAATTTGTCACTCCACTTCACATATCTAT	81.2129	79.7707	85.5943	65.7012
MitomiProbe_mut_2760	CTTCTGTAAATTTTTCACGTGCGATGACGCGCCCCG	723.739	462.35	240.343	101.434
MitomiProbe_mut_2761	CTTCTGTAAATTTTTCACGTGCGCTGACGCGCCCCG	966.14	560.078	241.676	101.377
MitomiProbe_mut_2762	CTTCTGTAAATTTTTCACGTGCGGTGAAGCGCCCCG	812.812	539.633	241.249	123.827
MitomiProbe_mut_2763	CTTCTGTAAATTTTTCACGTGCGTTGACGCGCCCCG	687.379	544.071	233.877	103.192
MitomiProbe_mut_2764	CTTCTGTAAATTTTTCACGTGCTATGACGCGCCCCG	1346.64	846.566	310.287	139.33
MitomiProbe_mut_2765	CTTCTGTAAATTTTTCACGTGCTCTGACGCGCCCCG	987.087	748.113	330.322	147.102
MitomiProbe_mut_2766	CTTCTGTAAATTTTTCACGTGCTGTGAAGCGCCCCG	824.581	672.198	325.498	146.291
MitomiProbe_mut_2767	CTTCTGTAAATTTTTCACGTGCTTTGACGCGCCCCG	1038.16	752.766	393.232	158.427
MitomiProbe_mut_2768	CTTCTGTAAATTTTTCACGTGGAATGACGCGCCCCG	428.62	365.234	211.033	100.832
MitomiProbe_mut_2769	CTTCTGTAAATTTTTCACGTGGACTGACGCGCCCCG	594.595	400.791	235.301	126.051
MitomiProbe_mut_277	AAAGCGGTAATTTGTCACTCGACTTCACATATCTAT	78.9436	84.7636	84.689	66.1928
MitomiProbe_mut_2770	CTTCTGTAAATTTTTCACGTGGAGTGAAGCGCCCCG	400.805	335.739	168.208	85.8885
MitomiProbe_mut_2771	CTTCTGTAAATTTTTCACGTGGATTGACGCGCCCCG	569.193	335.948	216.276	99.3157
MitomiProbe_mut_2772	CTTCTGTAAATTTTTCACGTGGCATGAAGCGCCCCG	696.253	561.79	228.51	103.594
MitomiProbe_mut_2773	CTTCTGTAAATTTTTCACGTGGCCTGACGCGCCCCG	880.691	430.75	277.335	98.0974
MitomiProbe_mut_2774	CTTCTGTAAATTTTTCACGTGGCGTGAAGCGCCCCG	682.519	395.434	209.003	86.2879
MitomiProbe_mut_2775	CTTCTGTAAATTTTTCACGTGGCTTGACGCGCCCCG	614.209	493.745	213.986	91.8591
MitomiProbe_mut_2776	CTTCTGTAAATTTTTCACGTGGGATGACGCGCCCCG	612.829	309.453	157.908	77.4967
MitomiProbe_mut_2777	CTTCTGTAAATTTTTCACGTGGGCTGACGCGCCCCG	748.91	452.492	181.841	96.7696
MitomiProbe_mut_2778	CTTCTGTAAATTTTTCACGTGGGGTGAAGCGCCCCG	613.129	368.747	169.171	81.0346
MitomiProbe_mut_2779	CTTCTGTAAATTTTTCACGTGGGTTGACGCGCCCCG	694.249	442.701	191.851	88.135
MitomiProbe_mut_278	AAAGCGGTAATTTGTCACTCTACTTCACATATCTAT	77.9408	71.1356	82.5616	70.9746
MitomiProbe_mut_2780	CTTCTGTAAATTTTTCACGTGGTATGACGCGCCCCG	1140.91	617.05	342.607	138.188
MitomiProbe_mut_2781	CTTCTGTAAATTTTTCACGTGGTCTGACGCGCCCCG	1231.98	748.735	419.513	151.548
MitomiProbe_mut_2782	CTTCTGTAAATTTTTCACGTGGTGTGAAGCGCCCCG	982.167	670.572	315.144	123.149
MitomiProbe_mut_2783	CTTCTGTAAATTTTTCACGTGGTTTGACGCGCCCCG	1180.46	880.752	421.511	167.199
MitomiProbe_mut_2784	CTTCTGTAAATTTTTCACGTGTAATGACGCGCCCCG	773.175	563.797	300.768	145.796
MitomiProbe_mut_2785	CTTCTGTAAATTTTTCACGTGTACTGACGCGCCCCG	799.762	593.722	319.453	142.38
MitomiProbe_mut_2786	CTTCTGTAAATTTTTCACGTGTAGTGAAGCGCCCCG	626.267	525.614	240.2	132.56
MitomiProbe_mut_2787	CTTCTGTAAATTTTTCACGTGTATTGACGCGCCCCG	775.44	437.151	305.883	126.208
MitomiProbe_mut_2788	CTTCTGTAAATTTTTCACGTGTCATGACGCGCCCCG	995.093	563.177	349.408	143.237
MitomiProbe_mut_2789	CTTCTGTAAATTTTTCACGTGTCCTGACGCGCCCCG	939.852	596.675	424.742	165.359
MitomiProbe_mut_279	AAAGCGGTAATTTGTCACTGAACTTCACATATCTAT	89.7561	82.5908	81.4044	81.5443
MitomiProbe_mut_2790	CTTCTGTAAATTTTTCACGTGTCGTGAAGCGCCCCG	634.316	652.254	284.16	145.695
MitomiProbe_mut_2791	CTTCTGTAAATTTTTCACGTGTCTTGACGCGCCCCG	838.997	581.197	310.941	116.665
MitomiProbe_mut_2792	CTTCTGTAAATTTTTCACGTGTGATGACGCGCCCCG	585.285	442.619	260.267	109.187
MitomiProbe_mut_2793	CTTCTGTAAATTTTTCACGTGTGCTGACGCGCCCCG	670.587	489.511	275.469	115.08
MitomiProbe_mut_2794	CTTCTGTAAATTTTTCACGTGTGGTGAAGCGCCCCG	585.317	411.604	234.09	107.647
MitomiProbe_mut_2795	CTTCTGTAAATTTTTCACGTGTGTTGACGCGCCCCG	579.795	462.716	265.116	124.314
MitomiProbe_mut_2796	CTTCTGTAAATTTTTCACGTGTTATGACGCGCCCCG	951.299	674.64	375.192	146.379
MitomiProbe_mut_2797	CTTCTGTAAATTTTTCACGTGTTCTGACGCGCCCCG	1269.75	955.249	494.286	174.258
MitomiProbe_mut_2798	CTTCTGTAAATTTTTCACGTGTTGTGAAGCGCCCCG	1031.44	731.865	352.581	170.931
[truncated: 8,277 more rows]

## Sheet: D. Data for sites in Fig2B,C
	Data point	Probe name	*Comparing Cbf1 binding (across 6 replicate probes) between 0.05uM competitor and			Sequence	Genomic coordinates
			0.4uM competitor	2uM competitor	8uM competitor
	Figure 2B, red	Probes_Cbf1_Pho4_uniq_mutMax_704	0.981207	0.365927	0.591826	CAATTCTTCGGGCGTCACATGACAAATATATAGGGA	chrIII: 310282-310288
	Figure 2B, blue	Probes_Cbf1_Pho4_uniq_mutMax_202	0.0029012	3.67185e-05	2.89338e-05	CGCTCCTTAGTAAAGCACGTGCCGATGATATCAATT	chrII: 92209-92215
	Data point	Probe name	*Comparing Pho4 binding (across 6 replicate probes) between 0.05uM competitor and			Sequence	Genomic coordinates
			0.4uM competitor	2uM competitor	8uM competitor
	Figure 2C, red	Probes_Cbf1_Pho4_uniq_mutMax_1026	0.373456	0.149426	0.961346	TAGAGGAAAGAAAGAAACGTGGGTAAAACAGGGGCC	chrIV: 768286-768292
	Figure 2C, blue	Probes_Cbf1_Pho4_uniq_mutMax_1988	1.62018e-05	3.88075e-06	1.64387e-06	CGCTCCTTAGTAAAGCACGTGCCGATGATATCAATT	chrVI: 184756-184762
	*Numbers represent p-values according to a one-sided t-test applied to replicate DNA spots.

## Sheet: E. Full data for Fig2C
Probe Name	Probe Sequence	Pho4 binding levels (2uM Pho4 + 50nM Cbf1)	Pho4 binding levels (2uM Pho4 + 400nM Cbf1)	Pho4 binding levels (2uM Pho4 + 2uM Cbf1)	Pho4 binding levels (2uM Pho4 + 8uM Cbf1)
MitomiProbe_mut_1	AAAGCGGTAATTTAACACGTGTTTTCACATATCTAT	21260	17854.9	15400.7	17435
MitomiProbe_mut_10	AAAGCGGTAATTTGAAACGTGGGTGCAGATATCTAT	13997.7	10890.3	12660.3	14398.9
MitomiProbe_mut_100	AAAGCGGTAATTTGCCGCGTGGGTGCAGATATCTAT	11003.5	10208.3	9726.32	10292.3
MitomiProbe_mut_1000	CATACCCAACCTTGGTTAGTGGGTGAAGATATTTGT	4188.76	3378.46	3395.31	3498.66
MitomiProbe_mut_1001	CATACCCAACCTTGGTTCGTGGGTGAAGATATTTGT	6727.86	5343.09	6524.66	5780.12
MitomiProbe_mut_1002	CATACCCAACCTTGGTTGGTGGGTGAAGATATTTGT	3432.55	3672.39	3109.94	3559.93
MitomiProbe_mut_1003	CATACCCAACCTTGGTTTGTGGGTGAAGATATTTGT	3736.45	2455.87	3242.07	3349.88
MitomiProbe_mut_1004	CATACCCAACCTTGTAAAGTGGGTGAAGATATTTGT	4110.8	3852.63	2698.32	3649.14
MitomiProbe_mut_1005	CATACCCAACCTTGTAACGTGGGTGAAGATATTTGT	10374.9	9075.87	10344.6	10862.3
MitomiProbe_mut_1006	CATACCCAACCTTGTAAGGTGGGTGAAGATATTTGT	3414.98	3570.9	3200.23	3834.7
MitomiProbe_mut_1007	CATACCCAACCTTGTAATGTGGGTGAAGATATTTGT	4461.69	3907.14	4040.84	4289.76
MitomiProbe_mut_1008	CATACCCAACCTTGTACAGTGGGTGAAGATATTTGT	3611.25	3629.65	3078.01	3597.12
MitomiProbe_mut_1009	CATACCCAACCTTGTACCGTGGGTGAAGATATTTGT	6617.15	5823.59	6305.63	5735.57
MitomiProbe_mut_101	AAAGCGGTAATTTGCCGGGTGGGTGCAGATATCTAT	4772.5	3777.74	3687.75	3862.27
MitomiProbe_mut_1010	CATACCCAACCTTGTACGGTGGGTGAAGATATTTGT	3868.9	3477.53	3529.85	3534.67
MitomiProbe_mut_1011	CATACCCAACCTTGTACTGTGGGTGAAGATATTTGT	4279.46	4092.85	3552.56	3885.95
MitomiProbe_mut_1012	CATACCCAACCTTGTAGAGTGGGTGAAGATATTTGT	3724.87	3523.46	3169.83	3520.66
MitomiProbe_mut_1013	CATACCCAACCTTGTAGCGTGGGTGAAGATATTTGT	6828.39	6999.67	7077.26	7421.21
MitomiProbe_mut_1014	CATACCCAACCTTGTAGGGTGGGTGAAGATATTTGT	4334.49	3460.91	3663.81	3877.73
MitomiProbe_mut_1015	CATACCCAACCTTGTAGTGTGGGTGAAGATATTTGT	5627.59	4694.41	4602.32	4507.14
MitomiProbe_mut_1016	CATACCCAACCTTGTATAGTGGGTGAAGATATTTGT	4060.52	3367.32	3066.59	3435.62
MitomiProbe_mut_1017	CATACCCAACCTTGTATCGTGGGTGAAGATATTTGT	8790.84	7509.32	7476.68	7153.06
MitomiProbe_mut_1018	CATACCCAACCTTGTATGGTGGGTGAAGATATTTGT	4209.24	4111.67	3946.65	3852.53
MitomiProbe_mut_1019	CATACCCAACCTTGTATTGTGGGTGAAGATATTTGT	4433.52	3871.85	3494.98	3832
MitomiProbe_mut_102	AAAGCGGTAATTTGCCGTGTGGGTGCAGATATCTAT	5294.18	4524.2	4560.56	4975.5
MitomiProbe_mut_1020	CATACCCAACCTTGTCAAGTGGGTGAAGATATTTGT	3450.89	3515.82	3181.56	3639.22
MitomiProbe_mut_1021	CATACCCAACCTTGTCACAAAACTTAAGATATTTGT	3200.53	2833.33	2965.85	3181.85
MitomiProbe_mut_1022	CATACCCAACCTTGTCACAACACTTAAGATATTTGT	4005.33	3741.36	3450.2	3707.54
MitomiProbe_mut_1023	CATACCCAACCTTGTCACAAGACTTAAGATATTTGT	4165.8	4030.04	3071.17	3605.07
MitomiProbe_mut_1024	CATACCCAACCTTGTCACAATACTTAAGATATTTGT	4031.98	3598.84	3115.62	3460.78
MitomiProbe_mut_1025	CATACCCAACCTTGTCACACAACTTAAGATATTTGT	4383.17	4255.09	3686.74	3563.12
MitomiProbe_mut_1026	CATACCCAACCTTGTCACACCACTTAAGATATTTGT	5069.28	4778.41	4134.98	3725.61
MitomiProbe_mut_1027	CATACCCAACCTTGTCACACGACTTAAGATATTTGT	6823.61	6125.49	6126.86	5742.31
MitomiProbe_mut_1028	CATACCCAACCTTGTCACACTACTTAAGATATTTGT	4855.16	3882.26	3684.18	4097.31
MitomiProbe_mut_1029	CATACCCAACCTTGTCACAGAACTTAAGATATTTGT	3521.81	3155.89	3010.48	3756.37
MitomiProbe_mut_103	AAAGCGGTAATTTGCCTAGTGGGTGCAGATATCTAT	5065.49	4133.82	4000.13	4108.97
MitomiProbe_mut_1030	CATACCCAACCTTGTCACAGCACTTAAGATATTTGT	4556.91	4122.09	3500.6	3448.3
MitomiProbe_mut_1031	CATACCCAACCTTGTCACAGGACTTAAGATATTTGT	3622.78	3288.67	3014.07	3300.16
MitomiProbe_mut_1032	CATACCCAACCTTGTCACAGTACTTAAGATATTTGT	3928.08	3586.43	3005.58	3438.49
MitomiProbe_mut_1033	CATACCCAACCTTGTCACATAACTTAAGATATTTGT	4135.22	3957.21	3302.59	3602.54
MitomiProbe_mut_1034	CATACCCAACCTTGTCACATCACTTAAGATATTTGT	4294.51	3460.3	3662.91	3435.36
MitomiProbe_mut_1035	CATACCCAACCTTGTCACATGACTTAAGATATTTGT	7427.99	4467.19	3437.72	3842.65
MitomiProbe_mut_1036	CATACCCAACCTTGTCACATTACTTAAGATATTTGT	4517.29	4246.27	3918.37	3763.03
MitomiProbe_mut_1037	CATACCCAACCTTGTCACCAAACTTAAGATATTTGT	3279.37	3223.95	2382.84	3254.35
MitomiProbe_mut_1038	CATACCCAACCTTGTCACCACACTTAAGATATTTGT	5366.67	4596.93	4221.22	4534.37
MitomiProbe_mut_1039	CATACCCAACCTTGTCACCAGACTTAAGATATTTGT	3691.07	2914.62	2893.4	3212.87
MitomiProbe_mut_104	AAAGCGGTAATTTGCCTCGTGGGTGCAGATATCTAT	12404.6	12567.6	11428.1	12580.7
MitomiProbe_mut_1040	CATACCCAACCTTGTCACCATACTTAAGATATTTGT	4407.65	3904.05	3505.8	3904.44
MitomiProbe_mut_1041	CATACCCAACCTTGTCACCCAACTTAAGATATTTGT	4002.18	3251.48	2719.7	3807.22
MitomiProbe_mut_1042	CATACCCAACCTTGTCACCCCACTTAAGATATTTGT	4321.32	3815.33	3300.98	3597.51
MitomiProbe_mut_1043	CATACCCAACCTTGTCACCCGACTTAAGATATTTGT	3548.28	3226.69	2902.12	3595.61
MitomiProbe_mut_1044	CATACCCAACCTTGTCACCCTACTTAAGATATTTGT	4219.49	3264.28	3176.67	3505.37
MitomiProbe_mut_1045	CATACCCAACCTTGTCACCGAACTTAAGATATTTGT	3309.09	3834.34	3090.64	3448.18
MitomiProbe_mut_1046	CATACCCAACCTTGTCACCGCACTTAAGATATTTGT	4037.3	3394.89	3391.35	4011.5
MitomiProbe_mut_1047	CATACCCAACCTTGTCACCGGACTTAAGATATTTGT	3435.79	2938.37	2909.96	3117.24
MitomiProbe_mut_1048	CATACCCAACCTTGTCACCGTACTTAAGATATTTGT	3916.31	3392.31	3185.46	3522.99
MitomiProbe_mut_1049	CATACCCAACCTTGTCACCTAACTTAAGATATTTGT	3635.87	2577.11	2844.15	3259.43
MitomiProbe_mut_105	AAAGCGGTAATTTGCCTGGTGGGTGCAGATATCTAT	4081.04	3471.21	3366.39	3771.74
MitomiProbe_mut_1050	CATACCCAACCTTGTCACCTCACTTAAGATATTTGT	3621.35	3237.24	2731.18	3310.82
MitomiProbe_mut_1051	CATACCCAACCTTGTCACCTGACTTAAGATATTTGT	4052.95	2480.77	2316.03	3014.13
MitomiProbe_mut_1052	CATACCCAACCTTGTCACCTTACTTAAGATATTTGT	3845.99	3415.59	2756.41	3275.26
MitomiProbe_mut_1053	CATACCCAACCTTGTCACGAAACTTAAGATATTTGT	4040.13	3599.39	3510.97	3640.32
MitomiProbe_mut_1054	CATACCCAACCTTGTCACGACACTTAAGATATTTGT	5237.47	4813.48	4425.44	3934.43
MitomiProbe_mut_1055	CATACCCAACCTTGTCACGAGACTTAAGATATTTGT	7734.93	6113.85	5209.67	4879.21
MitomiProbe_mut_1056	CATACCCAACCTTGTCACGATACTTAAGATATTTGT	6798.42	5175.64	5273.9	4686.91
MitomiProbe_mut_1057	CATACCCAACCTTGTCACGCAACTTAAGATATTTGT	5962.32	5597.54	4863.98	4910.74
MitomiProbe_mut_1058	CATACCCAACCTTGTCACGCCACTTAAGATATTTGT	6269.03	4907.95	5084.08	4589.7
MitomiProbe_mut_1059	CATACCCAACCTTGTCACGCGACTTAAGATATTTGT	10169.6	7302.31	6404.89	6084.85
MitomiProbe_mut_106	AAAGCGGTAATTTGCCTTGTGGGTGCAGATATCTAT	5836.26	4708.33	4796.44	4769.12
MitomiProbe_mut_1060	CATACCCAACCTTGTCACGCTACTTAAGATATTTGT	6839.79	5731.68	5347.87	4576.56
MitomiProbe_mut_1061	CATACCCAACCTTGTCACGGAACTTAAGATATTTGT	4062.38	3391.44	3630.98	3624.01
MitomiProbe_mut_1062	CATACCCAACCTTGTCACGGCACTTAAGATATTTGT	4285.84	3742.65	4129.34	3535.94
MitomiProbe_mut_1063	CATACCCAACCTTGTCACGGGACTTAAGATATTTGT	6723.75	5209.58	5183.36	4170.74
MitomiProbe_mut_1064	CATACCCAACCTTGTCACGGTACTTAAGATATTTGT	4708.34	3991.8	3930.82	3943.54
MitomiProbe_mut_1065	CATACCCAACCTTGTCACGTAACTTAAGATATTTGT	4780.23	4258.17	3812.38	3994.21
MitomiProbe_mut_1066	CATACCCAACCTTGTCACGTCACTTAAGATATTTGT	4764.32	4652.02	4163.86	3894.51
MitomiProbe_mut_1067	CATACCCAACCTTGTCACGTGACTTAAGATATTTGT	13668	7766.33	5851.52	4662.25
MitomiProbe_mut_1068	CATACCCAACCTTGTCACGTGGGTGAAGATATTTGT	20559.1	14186.6	13681.3	13934
MitomiProbe_mut_1069	CATACCCAACCTTGTCACGTGTTTTAAGATATTTGT	17861.2	14781.3	9259.57	11285.1
MitomiProbe_mut_107	AAAGCGGTAATTTGCGAAGTGGGTGCAGATATCTAT	4022.26	3711.73	2782.44	3483.19
MitomiProbe_mut_1070	CATACCCAACCTTGTCACGTTACTTAAGATATTTGT	9086.59	7205.25	6680.58	6213.4
MitomiProbe_mut_1071	CATACCCAACCTTGTCACTAAACTTAAGATATTTGT	3624.6	3299.78	2951.43	3325.72
MitomiProbe_mut_1072	CATACCCAACCTTGTCACTACACTTAAGATATTTGT	3978.88	3200.78	3168.54	3673.54
MitomiProbe_mut_1073	CATACCCAACCTTGTCACTAGACTTAAGATATTTGT	3434.08	3246.1	2663.73	3260.54
MitomiProbe_mut_1074	CATACCCAACCTTGTCACTATACTTAAGATATTTGT	3400.63	3456.04	2756.29	3571.47
MitomiProbe_mut_1075	CATACCCAACCTTGTCACTCAACTTAAGATATTTGT	3508.72	2948.69	2906.42	3602.05
MitomiProbe_mut_1076	CATACCCAACCTTGTCACTCCACTTAAGATATTTGT	3931.53	3422.1	3060.96	3748.16
MitomiProbe_mut_1077	CATACCCAACCTTGTCACTCGACTTAAGATATTTGT	3413.97	2685.3	3095.28	3247.45
MitomiProbe_mut_1078	CATACCCAACCTTGTCACTCTACTTAAGATATTTGT	4256.69	3241.86	2854.01	3578.42
MitomiProbe_mut_1079	CATACCCAACCTTGTCACTGAACTTAAGATATTTGT	3887.62	3270.29	2580.06	3262.08
MitomiProbe_mut_108	AAAGCGGTAATTTGCGACGTGGGTGCAGATATCTAT	7541.39	5633.35	5909	6595.54
MitomiProbe_mut_1080	CATACCCAACCTTGTCACTGCACTTAAGATATTTGT	4083.46	3247.87	2922.87	3612.25
MitomiProbe_mut_1081	CATACCCAACCTTGTCACTGGACTTAAGATATTTGT	3204.09	2953.62	2548.57	3254.58
MitomiProbe_mut_1082	CATACCCAACCTTGTCACTGTACTTAAGATATTTGT	3707.13	3555.98	2613.57	3787.12
MitomiProbe_mut_1083	CATACCCAACCTTGTCACTTAACTTAAGATATTTGT	3714.21	2798.46	2667.88	3260.19
MitomiProbe_mut_1084	CATACCCAACCTTGTCACTTCACTTAAGATATTTGT	3692.07	3299.48	3167.06	3271.21
MitomiProbe_mut_1085	CATACCCAACCTTGTCACTTGACTTAAGATATTTGT	3517.38	2866.15	2658.52	3498.53
MitomiProbe_mut_1086	CATACCCAACCTTGTCACTTTACTTAAGATATTTGT	3758.8	3127.04	2396.41	3310.7
MitomiProbe_mut_1087	CATACCCAACCTTGTCAGGTGGGTGAAGATATTTGT	5560.45	4482.22	4915.04	4451.43
MitomiProbe_mut_1088	CATACCCAACCTTGTCATGTGGGTGAAGATATTTGT	10398.6	9021.77	10216	9981.18
MitomiProbe_mut_1089	CATACCCAACCTTGTCCAGTGGGTGAAGATATTTGT	4275.93	3227.56	3208.78	3339.78
MitomiProbe_mut_109	AAAGCGGTAATTTGCGAGGTGGGTGCAGATATCTAT	4243.54	3825.37	3382.18	3922.96
MitomiProbe_mut_1090	CATACCCAACCTTGTCCCGTGGGTGAAGATATTTGT	11785.5	9412.03	9783.66	10522.2
MitomiProbe_mut_1091	CATACCCAACCTTGTCCGGTGGGTGAAGATATTTGT	3909.7	3157.6	3805.16	3792.34
MitomiProbe_mut_1092	CATACCCAACCTTGTCCTGTGGGTGAAGATATTTGT	4564.73	4276.95	3842.35	4004.8
MitomiProbe_mut_1093	CATACCCAACCTTGTCGAGTGGGTGAAGATATTTGT	3740.95	3331.69	3323.82	3408.47
MitomiProbe_mut_1094	CATACCCAACCTTGTCGCGTGGGTGAAGATATTTGT	10910.1	8877.21	8958.13	10014.2
MitomiProbe_mut_1095	CATACCCAACCTTGTCGGGTGGGTGAAGATATTTGT	3891.77	3931.8	3628.33	3757.04
MitomiProbe_mut_1096	CATACCCAACCTTGTCGTGTGGGTGAAGATATTTGT	5576.52	5773.1	5840.04	5606.57
MitomiProbe_mut_1097	CATACCCAACCTTGTCTAGTGGGTGAAGATATTTGT	4020.75	3366.15	3069.35	3645.72
MitomiProbe_mut_1098	CATACCCAACCTTGTCTCGTGGGTGAAGATATTTGT	10654.8	10148.1	9442.68	9747.31
MitomiProbe_mut_1099	CATACCCAACCTTGTCTGGTGGGTGAAGATATTTGT	3510.95	2687.76	3230.12	3407.82
MitomiProbe_mut_11	AAAGCGGTAATTTGAAAGGTGGGTGCAGATATCTAT	4271.69	3621.1	3584.37	3763.45
MitomiProbe_mut_110	AAAGCGGTAATTTGCGATGTGGGTGCAGATATCTAT	4470.89	3542.57	3559.04	4018.22
MitomiProbe_mut_1100	CATACCCAACCTTGTCTTGTGGGTGAAGATATTTGT	4656.06	4032.29	3916.22	3975.17
MitomiProbe_mut_1101	CATACCCAACCTTGTGAAGTGGGTGAAGATATTTGT	4047.28	3787.03	3577.07	3618.1
MitomiProbe_mut_1102	CATACCCAACCTTGTGACGTGGGTGAAGATATTTGT	7257.41	6679.64	6544.8	5563.07
MitomiProbe_mut_1103	CATACCCAACCTTGTGAGGTGGGTGAAGATATTTGT	4305.75	5119.44	5056.81	4383.51
MitomiProbe_mut_1104	CATACCCAACCTTGTGATGTGGGTGAAGATATTTGT	5293.79	4776.71	4775.29	4543.04
MitomiProbe_mut_1105	CATACCCAACCTTGTGCAGTGGGTGAAGATATTTGT	7059.84	5181.57	5915.4	5521.67
MitomiProbe_mut_1106	CATACCCAACCTTGTGCCGTGGGTGAAGATATTTGT	7415.73	5858.46	6626.38	6206.43
MitomiProbe_mut_1107	CATACCCAACCTTGTGCGGTGGGTGAAGATATTTGT	7267.08	6032.04	6570.25	6108.22
MitomiProbe_mut_1108	CATACCCAACCTTGTGCTGTGGGTGAAGATATTTGT	7294.49	5901.55	6232.75	5556.42
MitomiProbe_mut_1109	CATACCCAACCTTGTGGAGTGGGTGAAGATATTTGT	5988.76	5132.87	4723.55	4391.56
MitomiProbe_mut_111	AAAGCGGTAATTTGCGCAGTGGGTGCAGATATCTAT	3780.98	3475.3	3699.25	3566.75
MitomiProbe_mut_1110	CATACCCAACCTTGTGGCGTGGGTGAAGATATTTGT	8097.6	6969.57	7580.44	7613.44
MitomiProbe_mut_1111	CATACCCAACCTTGTGGGGTGGGTGAAGATATTTGT	7172.3	5622.21	6856.61	6059.79
MitomiProbe_mut_1112	CATACCCAACCTTGTGGTGTGGGTGAAGATATTTGT	7223.09	5840.17	6044.96	5711.14
MitomiProbe_mut_1113	CATACCCAACCTTGTGTAGTGGGTGAAGATATTTGT	5025.54	4738.57	4605.9	4450.43
MitomiProbe_mut_1114	CATACCCAACCTTGTGTCGTGGGTGAAGATATTTGT	7400.19	6674.83	7452.61	7570.32
MitomiProbe_mut_1115	CATACCCAACCTTGTGTGGTGGGTGAAGATATTTGT	6393.78	5406.89	5515.12	4992.19
MitomiProbe_mut_1116	CATACCCAACCTTGTGTTGTGGGTGAAGATATTTGT	6045.38	5149.33	5340.25	5234.82
MitomiProbe_mut_1117	CATACCCAACCTTGTTAAGTGGGTGAAGATATTTGT	3607.48	3373.51	2838.69	3398.88
MitomiProbe_mut_1118	CATACCCAACCTTGTTACGTGGGTGAAGATATTTGT	6246.71	5449.63	5643.27	5703.56
MitomiProbe_mut_1119	CATACCCAACCTTGTTAGGTGGGTGAAGATATTTGT	3576.08	2788.95	2942.55	3372.43
MitomiProbe_mut_112	AAAGCGGTAATTTGCGCCGTGGGTGCAGATATCTAT	5334.11	4945.84	4917.69	5069.8
MitomiProbe_mut_1120	CATACCCAACCTTGTTATGTGGGTGAAGATATTTGT	4328.47	3408.61	3227.58	3775.89
MitomiProbe_mut_1121	CATACCCAACCTTGTTCAGTGGGTGAAGATATTTGT	3339.71	3488.79	2907.82	3377.19
MitomiProbe_mut_1122	CATACCCAACCTTGTTCCGTGGGTGAAGATATTTGT	5052.18	4259.1	4557.68	4826.81
MitomiProbe_mut_1123	CATACCCAACCTTGTTCGGTGGGTGAAGATATTTGT	3527.76	3319.97	3229.68	3416.1
MitomiProbe_mut_1124	CATACCCAACCTTGTTCTGTGGGTGAAGATATTTGT	3653.26	3345.92	3171.14	3486.53
MitomiProbe_mut_1125	CATACCCAACCTTGTTGAGTGGGTGAAGATATTTGT	3956.97	3264.7	3481.88	3591.8
MitomiProbe_mut_1126	CATACCCAACCTTGTTGCGTGGGTGAAGATATTTGT	7021.35	6804.38	6630.95	6720.5
MitomiProbe_mut_1127	CATACCCAACCTTGTTGGGTGGGTGAAGATATTTGT	3858.36	3322.46	3441.45	3426.82
MitomiProbe_mut_1128	CATACCCAACCTTGTTGTGTGGGTGAAGATATTTGT	4909.34	3829.99	4292.29	4686.25
MitomiProbe_mut_1129	CATACCCAACCTTGTTTAGTGGGTGAAGATATTTGT	3529.62	3255.53	2694.95	3558.7
MitomiProbe_mut_113	AAAGCGGTAATTTGCGCGGTGGGTGCAGATATCTAT	4384.15	3777.02	3340.01	3699.84
MitomiProbe_mut_1130	CATACCCAACCTTGTTTCGTGGGTGAAGATATTTGT	4861	4623.27	5013.01	4678.96
MitomiProbe_mut_1131	CATACCCAACCTTGTTTGGTGGGTGAAGATATTTGT	3476.52	2546.57	3370.61	3545.35
MitomiProbe_mut_1132	CATACCCAACCTTGTTTTGTGGGTGAAGATATTTGT	4085.66	3653.61	2736.81	3519.05
MitomiProbe_mut_1133	CATACCCAACCTTTACACGTGTTTTAAGATATTTGT	19918.1	17468.8	15473.9	14748.2
MitomiProbe_mut_1134	CATACCCAACCTTTCCACGTGTTTTAAGATATTTGT	18927.4	17687.3	17961.1	18293.9
MitomiProbe_mut_1135	CATACCCAACCTTTGCACGTGTTTTAAGATATTTGT	21963.3	21266.9	17929.2	17735.2
MitomiProbe_mut_1136	CATACCCAACCTTTTCACGTGAAATAAGATATTTGT	10468.9	8587.23	7031.98	7708.91
MitomiProbe_mut_1137	CATACCCAACCTTTTCACGTGAACTAAGATATTTGT	11906.5	8710.63	8434.02	8514.16
MitomiProbe_mut_1138	CATACCCAACCTTTTCACGTGAAGTAAGATATTTGT	11473.5	8223.11	7876.14	8374.4
MitomiProbe_mut_1139	CATACCCAACCTTTTCACGTGAATTAAGATATTTGT	11810.8	10017.9	8370.61	9215.3
MitomiProbe_mut_114	AAAGCGGTAATTTGCGCTGTGGGTGCAGATATCTAT	4053.28	3383.52	3090.45	3471.65
MitomiProbe_mut_1140	CATACCCAACCTTTTCACGTGACATAAGATATTTGT	13416.6	9022.65	6225.42	7073.1
MitomiProbe_mut_1141	CATACCCAACCTTTTCACGTGACCTAAGATATTTGT	12608.7	7892.21	6289.94	5685.31
MitomiProbe_mut_1142	CATACCCAACCTTTTCACGTGACGTAAGATATTTGT	13959.5	8745.81	7277.18	6765.47
MitomiProbe_mut_1143	CATACCCAACCTTTTCACGTGACTTAAGATATTTGT	12474.5	7502.2	5838.6	5936.27
MitomiProbe_mut_1144	CATACCCAACCTTTTCACGTGAGATAAGATATTTGT	11717.9	9071.27	8414.97	8587.07
MitomiProbe_mut_1145	CATACCCAACCTTTTCACGTGAGCTAAGATATTTGT	11723.1	10847.3	9005.05	9450.73
MitomiProbe_mut_1146	CATACCCAACCTTTTCACGTGAGGTAAGATATTTGT	12245.3	12089.6	10136.1	10122.1
MitomiProbe_mut_1147	CATACCCAACCTTTTCACGTGAGTTAAGATATTTGT	12515.8	9243.98	8704.33	9007.11
MitomiProbe_mut_1148	CATACCCAACCTTTTCACGTGATATAAGATATTTGT	12612.4	9695.66	7563.67	8124.31
MitomiProbe_mut_1149	CATACCCAACCTTTTCACGTGATCTAAGATATTTGT	13525.4	8091.62	6321.49	6457.4
MitomiProbe_mut_115	AAAGCGGTAATTTGCGGAGTGGGTGCAGATATCTAT	4303.43	3932.36	3377.06	3968.33
MitomiProbe_mut_1150	CATACCCAACCTTTTCACGTGATGTAAGATATTTGT	14837.6	9001.08	8223.26	7675.22
MitomiProbe_mut_1151	CATACCCAACCTTTTCACGTGATTTAAGATATTTGT	14116.4	8244.07	6961.48	7373.73
MitomiProbe_mut_1152	CATACCCAACCTTTTCACGTGCAATAAGATATTTGT	16207	13412.2	12021.7	12614.5
MitomiProbe_mut_1153	CATACCCAACCTTTTCACGTGCACTAAGATATTTGT	15812.2	13598.9	11204.1	14097.2
MitomiProbe_mut_1154	CATACCCAACCTTTTCACGTGCAGTAAGATATTTGT	17075	13328	12488.9	14449.6
MitomiProbe_mut_1155	CATACCCAACCTTTTCACGTGCATTAAGATATTTGT	14381.3	14790	11086.8	13363.6
MitomiProbe_mut_1156	CATACCCAACCTTTTCACGTGCCATAAGATATTTGT	15813.9	15680.6	13177.8	15083.1
MitomiProbe_mut_1157	CATACCCAACCTTTTCACGTGCCCTAAGATATTTGT	18656.6	16623.5	13013.7	12598.4
MitomiProbe_mut_1158	CATACCCAACCTTTTCACGTGCCGTAAGATATTTGT	15756	15206.3	13129.4	13410.7
MitomiProbe_mut_1159	CATACCCAACCTTTTCACGTGCCTTAAGATATTTGT	14853.2	13114.1	13875.2	13408.2
MitomiProbe_mut_116	AAAGCGGTAATTTGCGGCGTGGGTGCAGATATCTAT	7880.79	7170.88	7174.94	8355.33
MitomiProbe_mut_1160	CATACCCAACCTTTTCACGTGCGATAAGATATTTGT	12672.1	15844.3	12013.7	13217.5
MitomiProbe_mut_1161	CATACCCAACCTTTTCACGTGCGCTAAGATATTTGT	14954.6	11317.5	12399.2	13586.8
MitomiProbe_mut_1162	CATACCCAACCTTTTCACGTGCGGTAAGATATTTGT	14179.3	11508.1	11936.9	12381.9
MitomiProbe_mut_1163	CATACCCAACCTTTTCACGTGCGTTAAGATATTTGT	15743.6	12800.8	13749.2	14080.8
MitomiProbe_mut_1164	CATACCCAACCTTTTCACGTGCTATAAGATATTTGT	17640.8	14006.2	13428.5	15263.2
MitomiProbe_mut_1165	CATACCCAACCTTTTCACGTGCTCTAAGATATTTGT	19391.3	14514.2	15353.3	14267.3
MitomiProbe_mut_1166	CATACCCAACCTTTTCACGTGCTGTAAGATATTTGT	14154.7	14036.8	14543	13573.5
MitomiProbe_mut_1167	CATACCCAACCTTTTCACGTGCTTTAAGATATTTGT	18290.4	16972.5	14945.8	14685.4
MitomiProbe_mut_1168	CATACCCAACCTTTTCACGTGGAATAAGATATTTGT	13570.2	10678.5	10778	11794.4
MitomiProbe_mut_1169	CATACCCAACCTTTTCACGTGGACTAAGATATTTGT	16396.2	12082.4	13426.5	14627.5
MitomiProbe_mut_117	AAAGCGGTAATTTGCGGGGTGGGTGCAGATATCTAT	5070.27	4531.36	4014.78	4083.05
MitomiProbe_mut_1170	CATACCCAACCTTTTCACGTGGAGTAAGATATTTGT	15432.9	11309.1	11225.7	11272.9
MitomiProbe_mut_1171	CATACCCAACCTTTTCACGTGGATTAAGATATTTGT	14689.8	12057.8	12010.6	11975.1
MitomiProbe_mut_1172	CATACCCAACCTTTTCACGTGGCATAAGATATTTGT	15659.4	11704	11172.2	12778.8
MitomiProbe_mut_1173	CATACCCAACCTTTTCACGTGGCCTAAGATATTTGT	14131.3	15587.7	14004.2	14429
MitomiProbe_mut_1174	CATACCCAACCTTTTCACGTGGCGTAAGATATTTGT	14544.3	13193.9	12152.9	14216.4
MitomiProbe_mut_1175	CATACCCAACCTTTTCACGTGGCTTAAGATATTTGT	15071.1	13106.9	12284.9	13187.6
MitomiProbe_mut_1176	CATACCCAACCTTTTCACGTGGGATAAGATATTTGT	14279.8	15363.1	13532.3	14036.7
MitomiProbe_mut_1177	CATACCCAACCTTTTCACGTGGGCTAAGATATTTGT	17114.6	16711.4	14829.9	14387.6
MitomiProbe_mut_1178	CATACCCAACCTTTTCACGTGGGGTAAGATATTTGT	16667.7	15171.4	14394	15120.5
MitomiProbe_mut_1179	CATACCCAACCTTTTCACGTGGGTTAAGATATTTGT	14543.5	15188.4	12926.5	13205.9
MitomiProbe_mut_118	AAAGCGGTAATTTGCGGTGTGGGTGCAGATATCTAT	4901.54	4841.82	4520.45	4658.4
MitomiProbe_mut_1180	CATACCCAACCTTTTCACGTGGTATAAGATATTTGT	13945.7	13117.8	11864.1	13936.2
MitomiProbe_mut_1181	CATACCCAACCTTTTCACGTGGTCTAAGATATTTGT	14319.3	12705.7	12125.5	14247.5
MitomiProbe_mut_1182	CATACCCAACCTTTTCACGTGGTGTAAGATATTTGT	16332.9	12815.5	13985.6	15979
MitomiProbe_mut_1183	CATACCCAACCTTTTCACGTGGTTTAAGATATTTGT	14915.6	12606.6	11674	12428.8
MitomiProbe_mut_1184	CATACCCAACCTTTTCACGTGTAATAAGATATTTGT	16613.7	13661.3	11597.7	13121.2
MitomiProbe_mut_1185	CATACCCAACCTTTTCACGTGTACTAAGATATTTGT	14337	12492.3	12402.6	12299.3
MitomiProbe_mut_1186	CATACCCAACCTTTTCACGTGTAGTAAGATATTTGT	15382.5	11058.2	10873.3	11953.5
MitomiProbe_mut_1187	CATACCCAACCTTTTCACGTGTATTAAGATATTTGT	14356.7	13036.5	13326.9	12644.5
MitomiProbe_mut_1188	CATACCCAACCTTTTCACGTGTCATAAGATATTTGT	13056.9	12506.1	11702	13595.8
MitomiProbe_mut_1189	CATACCCAACCTTTTCACGTGTCCTAAGATATTTGT	14485.8	14044.8	11942.8	12405.8
MitomiProbe_mut_119	AAAGCGGTAATTTGCGTAGTGGGTGCAGATATCTAT	4338.77	3514.68	3044.18	4140.31
MitomiProbe_mut_1190	CATACCCAACCTTTTCACGTGTCGTAAGATATTTGT	15191	13701.3	12127.1	12685.5
MitomiProbe_mut_1191	CATACCCAACCTTTTCACGTGTCTTAAGATATTTGT	14975	17889.6	14015.1	13972
MitomiProbe_mut_1192	CATACCCAACCTTTTCACGTGTGATAAGATATTTGT	13886.6	11182.8	12188.5	13233.3
MitomiProbe_mut_1193	CATACCCAACCTTTTCACGTGTGCTAAGATATTTGT	15601.8	13246.1	12757.8	14486.1
MitomiProbe_mut_1194	CATACCCAACCTTTTCACGTGTGGTAAGATATTTGT	13842.1	13401.1	12283	13752.9
MitomiProbe_mut_1195	CATACCCAACCTTTTCACGTGTGTTAAGATATTTGT	14211.7	13247.1	12175.2	13400.4
MitomiProbe_mut_1196	CATACCCAACCTTTTCACGTGTTATAAGATATTTGT	17482.7	13467.9	12494.6	13035.1
MitomiProbe_mut_1197	CATACCCAACCTTTTCACGTGTTCTAAGATATTTGT	13891	11949.4	10878.8	13202.9
MitomiProbe_mut_1198	CATACCCAACCTTTTCACGTGTTGTAAGATATTTGT	16608.8	13173.2	12224.8	13585.1
MitomiProbe_mut_1199	CATACCCAACCTTTTCACGTGTTTTAAGATATTTGT	16673.9	11803.5	13228.1	13330.4
MitomiProbe_mut_12	AAAGCGGTAATTTGAAATGTGGGTGCAGATATCTAT	5637.57	5360.67	4631.94	4936.19
MitomiProbe_mut_120	AAAGCGGTAATTTGCGTCGTGGGTGCAGATATCTAT	7610.64	6393.33	6859.44	7480.71
MitomiProbe_mut_1200	CATACCCAACCTTTTCACGTGTTTTAAGATATTTGT	14705.8	13824.5	12113.1	13000.6
MitomiProbe_mut_1201	CGGGGTTAAGTTTAACACGTGTTTTGCTTGCAGCAG	15120.8	16887.2	13892.8	14679.6
MitomiProbe_mut_1202	CGGGGTTAAGTTTACCACGTGTTTTGCTTGCAGCAG	17424.8	13316.1	14681.1	16280
MitomiProbe_mut_1203	CGGGGTTAAGTTTAGCACGTGTTTTGCTTGCAGCAG	18325.2	13940.3	15282.5	15823.3
MitomiProbe_mut_1204	CGGGGTTAAGTTTATCACGTGTTTTGCTTGCAGCAG	16551.8	13383.2	10512.9	12493.1
MitomiProbe_mut_1205	CGGGGTTAAGTTTCACACGTGTTTTGCTTGCAGCAG	15195.2	13062.4	13639.9	15038.4
MitomiProbe_mut_1206	CGGGGTTAAGTTTCCCACGTGTTTTGCTTGCAGCAG	16074.8	16652.1	14063.9	16959.6
MitomiProbe_mut_1207	CGGGGTTAAGTTTCGCACGTGTTTTGCTTGCAGCAG	15361.4	15252.8	13611.1	14970.1
MitomiProbe_mut_1208	CGGGGTTAAGTTTCTCACGTGTTTTGCTTGCAGCAG	13084.2	11167.7	11328.8	11207.5
MitomiProbe_mut_1209	CGGGGTTAAGTTTGAAAAGTGGGTGGCTTGCAGCAG	4187.16	3692.37	3610.46	3605.64
MitomiProbe_mut_121	AAAGCGGTAATTTGCGTGGTGGGTGCAGATATCTAT	5687.71	5504.19	5159	5530.39
MitomiProbe_mut_1210	CGGGGTTAAGTTTGAAACGTGGGTGGCTTGCAGCAG	14986.1	10159.4	11926.7	13471.6
MitomiProbe_mut_1211	CGGGGTTAAGTTTGAAAGGTGGGTGGCTTGCAGCAG	4870.05	3174.26	4625.39	3625
MitomiProbe_mut_1212	CGGGGTTAAGTTTGAAATGTGGGTGGCTTGCAGCAG	5800.73	5153.39	5570	5200.18
MitomiProbe_mut_1213	CGGGGTTAAGTTTGAACAGTGGGTGGCTTGCAGCAG	4782.23	3850.56	3751.47	3557.5
MitomiProbe_mut_1214	CGGGGTTAAGTTTGAACCGTGGGTGGCTTGCAGCAG	7458.51	6110.73	6786.91	5590.33
MitomiProbe_mut_1215	CGGGGTTAAGTTTGAACGGTGGGTGGCTTGCAGCAG	4799.19	4820.04	4191.64	3807.48
MitomiProbe_mut_1216	CGGGGTTAAGTTTGAACTGTGGGTGGCTTGCAGCAG	4729.73	4115.78	3613.45	3707.14
MitomiProbe_mut_1217	CGGGGTTAAGTTTGAAGAGTGGGTGGCTTGCAGCAG	3879.57	4586.29	4220.82	3876.78
MitomiProbe_mut_1218	CGGGGTTAAGTTTGAAGCGTGGGTGGCTTGCAGCAG	8120.28	6416.14	7114.79	8162.22
MitomiProbe_mut_1219	CGGGGTTAAGTTTGAAGGGTGGGTGGCTTGCAGCAG	4696.05	4053.51	4450.4	3690.86
MitomiProbe_mut_122	AAAGCGGTAATTTGCGTTGTGGGTGCAGATATCTAT	4560.32	3956.4	3554.94	4110.34
MitomiProbe_mut_1220	CGGGGTTAAGTTTGAAGTGTGGGTGGCTTGCAGCAG	5325.96	4527.88	4456.87	4249.57
MitomiProbe_mut_1221	CGGGGTTAAGTTTGAATAGTGGGTGGCTTGCAGCAG	4380.45	3866.58	3950.39	3604.79
MitomiProbe_mut_1222	CGGGGTTAAGTTTGAATCGTGGGTGGCTTGCAGCAG	7121.46	6364.12	6624.43	6555.04
MitomiProbe_mut_1223	CGGGGTTAAGTTTGAATGGTGGGTGGCTTGCAGCAG	4995.12	3870.65	3821.88	3948.38
MitomiProbe_mut_1224	CGGGGTTAAGTTTGAATTGTGGGTGGCTTGCAGCAG	4667.78	3754.4	3960.95	4018.95
MitomiProbe_mut_1225	CGGGGTTAAGTTTGACAAGTGGGTGGCTTGCAGCAG	4709.6	3983.15	3898.75	3775.93
MitomiProbe_mut_1226	CGGGGTTAAGTTTGACACGTGGGTGGCTTGCAGCAG	17337.4	13658.7	17048.7	15688.2
MitomiProbe_mut_1227	CGGGGTTAAGTTTGACACGTGTTTTGCTTGCAGCAG	17257.2	13793.1	16710.8	16511.2
MitomiProbe_mut_1228	CGGGGTTAAGTTTGACAGGTGGGTGGCTTGCAGCAG	6621.76	5052.66	5775.13	5110.31
MitomiProbe_mut_1229	CGGGGTTAAGTTTGACATGTGGGTGGCTTGCAGCAG	10618.2	10618.2	9751.57	11162.9
MitomiProbe_mut_123	AAAGCGGTAATTTGCTAAGTGGGTGCAGATATCTAT	3816.86	2757.33	2577.9	3426.87
MitomiProbe_mut_1230	CGGGGTTAAGTTTGACCAGTGGGTGGCTTGCAGCAG	4301.83	3441.14	3418.82	3639.08
MitomiProbe_mut_1231	CGGGGTTAAGTTTGACCCGTGGGTGGCTTGCAGCAG	8537.1	7267.71	8702.92	8599.92
MitomiProbe_mut_1232	CGGGGTTAAGTTTGACCGGTGGGTGGCTTGCAGCAG	4626.94	3193.25	3897.18	3646.3
MitomiProbe_mut_1233	CGGGGTTAAGTTTGACCTGTGGGTGGCTTGCAGCAG	4649.43	3824.07	4217.67	3985.86
MitomiProbe_mut_1234	CGGGGTTAAGTTTGACGAGTGGGTGGCTTGCAGCAG	4386.45	3733.05	4099.83	3630.94
MitomiProbe_mut_1235	CGGGGTTAAGTTTGACGCGTGGGTGGCTTGCAGCAG	11563.2	8716.93	9120.48	10639.5
MitomiProbe_mut_1236	CGGGGTTAAGTTTGACGGGTGGGTGGCTTGCAGCAG	5313.75	5380.37	4547.53	4163.44
MitomiProbe_mut_1237	CGGGGTTAAGTTTGACGTGTGGGTGGCTTGCAGCAG	6169.01	5318.84	5433.61	5274.4
MitomiProbe_mut_1238	CGGGGTTAAGTTTGACTAGTGGGTGGCTTGCAGCAG	4057.1	3347.82	3691.78	3622.96
MitomiProbe_mut_1239	CGGGGTTAAGTTTGACTCGTGGGTGGCTTGCAGCAG	10267.5	9176.24	9148.29	9203.17
MitomiProbe_mut_124	AAAGCGGTAATTTGCTACGTGGGTGCAGATATCTAT	7530.56	6343.42	6534.62	7001.35
MitomiProbe_mut_1240	CGGGGTTAAGTTTGACTGGTGGGTGGCTTGCAGCAG	4745.64	4280.6	3612.36	3779.04
MitomiProbe_mut_1241	CGGGGTTAAGTTTGACTTGTGGGTGGCTTGCAGCAG	5051.2	3896.63	4398.22	4213.74
MitomiProbe_mut_1242	CGGGGTTAAGTTTGAGAAGTGGGTGGCTTGCAGCAG	4408.23	3618.96	3879.58	3700.26
MitomiProbe_mut_1243	CGGGGTTAAGTTTGAGACGTGGGTGGCTTGCAGCAG	6622	5800.5	6177.36	6564.81
MitomiProbe_mut_1244	CGGGGTTAAGTTTGAGAGGTGGGTGGCTTGCAGCAG	4458.57	4455.64	4204.6	3743.73
MitomiProbe_mut_1245	CGGGGTTAAGTTTGAGATGTGGGTGGCTTGCAGCAG	4585.47	3881.19	4400.87	4139.51
MitomiProbe_mut_1246	CGGGGTTAAGTTTGAGCAGTGGGTGGCTTGCAGCAG	4433.37	4171.06	4056.85	3656.94
MitomiProbe_mut_1247	CGGGGTTAAGTTTGAGCCGTGGGTGGCTTGCAGCAG	5789.49	4711.29	4880.62	4737.88
MitomiProbe_mut_1248	CGGGGTTAAGTTTGAGCGGTGGGTGGCTTGCAGCAG	4073.57	3498.04	3671.78	3574.12
MitomiProbe_mut_1249	CGGGGTTAAGTTTGAGCTGTGGGTGGCTTGCAGCAG	4387.9	3776.06	4106.85	3809.14
MitomiProbe_mut_125	AAAGCGGTAATTTGCTAGGTGGGTGCAGATATCTAT	4165.05	3652.83	3110	3923.71
MitomiProbe_mut_1250	CGGGGTTAAGTTTGAGGAGTGGGTGGCTTGCAGCAG	5250.78	4383.87	4299.29	3837.8
MitomiProbe_mut_1251	CGGGGTTAAGTTTGAGGCGTGGGTGGCTTGCAGCAG	7804.99	7276.72	7158.94	7594.68
MitomiProbe_mut_1252	CGGGGTTAAGTTTGAGGGGTGGGTGGCTTGCAGCAG	5575.02	3999.15	4861.6	3734.77
MitomiProbe_mut_1253	CGGGGTTAAGTTTGAGGTGTGGGTGGCTTGCAGCAG	5749.79	5353.28	5074.36	4575.31
MitomiProbe_mut_1254	CGGGGTTAAGTTTGAGTAGTGGGTGGCTTGCAGCAG	5053.28	4499.31	4353.82	3820.64
MitomiProbe_mut_1255	CGGGGTTAAGTTTGAGTCGTGGGTGGCTTGCAGCAG	7052.05	5814.82	6613.24	6788.24
MitomiProbe_mut_1256	CGGGGTTAAGTTTGAGTGGTGGGTGGCTTGCAGCAG	4855.08	4133	4275.96	4002.46
MitomiProbe_mut_1257	CGGGGTTAAGTTTGAGTTGTGGGTGGCTTGCAGCAG	4561.69	4278.69	4022.61	4142.72
MitomiProbe_mut_1258	CGGGGTTAAGTTTGATAAGTGGGTGGCTTGCAGCAG	4490.16	3687	3861.79	3632.09
MitomiProbe_mut_1259	CGGGGTTAAGTTTGATACGTGGGTGGCTTGCAGCAG	7214.94	5528.74	6674.46	6773.82
MitomiProbe_mut_126	AAAGCGGTAATTTGCTATGTGGGTGCAGATATCTAT	4213.68	4105.12	3851.17	4009.3
MitomiProbe_mut_1260	CGGGGTTAAGTTTGATAGGTGGGTGGCTTGCAGCAG	4344.26	3328.52	3629.11	3744.42
MitomiProbe_mut_1261	CGGGGTTAAGTTTGATATGTGGGTGGCTTGCAGCAG	4741.84	4326	4311.8	4041.21
MitomiProbe_mut_1262	CGGGGTTAAGTTTGATCAGTGGGTGGCTTGCAGCAG	4229.02	4391.91	3831.95	3696.38
MitomiProbe_mut_1263	CGGGGTTAAGTTTGATCCGTGGGTGGCTTGCAGCAG	6188.35	5374.45	5035.44	5540.18
MitomiProbe_mut_1264	CGGGGTTAAGTTTGATCGGTGGGTGGCTTGCAGCAG	4250.34	2852.13	3981.76	3524.84
MitomiProbe_mut_1265	CGGGGTTAAGTTTGATCTGTGGGTGGCTTGCAGCAG	4261.3	3038.59	4012.5	3983.52
MitomiProbe_mut_1266	CGGGGTTAAGTTTGATGAGTGGGTGGCTTGCAGCAG	5339.7	4639.76	4434.97	4117.78
MitomiProbe_mut_1267	CGGGGTTAAGTTTGATGCGTGGGTGGCTTGCAGCAG	8546.97	8316.08	8289.62	9060.07
MitomiProbe_mut_1268	CGGGGTTAAGTTTGATGGGTGGGTGGCTTGCAGCAG	4761.95	4157.22	4227.16	3991.19
MitomiProbe_mut_1269	CGGGGTTAAGTTTGATGTGTGGGTGGCTTGCAGCAG	5366.66	5276.53	5143.94	4526.95
MitomiProbe_mut_127	AAAGCGGTAATTTGCTCAGTGGGTGCAGATATCTAT	3923.8	4006.36	2837.89	3670.75
MitomiProbe_mut_1270	CGGGGTTAAGTTTGATTAGTGGGTGGCTTGCAGCAG	4595.3	3952.59	3738.69	3733.11
MitomiProbe_mut_1271	CGGGGTTAAGTTTGATTCGTGGGTGGCTTGCAGCAG	5595.44	4912.92	5606.73	5362.65
MitomiProbe_mut_1272	CGGGGTTAAGTTTGATTGGTGGGTGGCTTGCAGCAG	4704.62	3960.9	3651.18	3858.92
MitomiProbe_mut_1273	CGGGGTTAAGTTTGATTTGTGGGTGGCTTGCAGCAG	3849.07	3139.84	3527.2	3824.01
MitomiProbe_mut_1274	CGGGGTTAAGTTTGCAAAGTGGGTGGCTTGCAGCAG	4895.16	4367.05	3690.11	4113.39
MitomiProbe_mut_1275	CGGGGTTAAGTTTGCAACGTGGGTGGCTTGCAGCAG	13148.7	12944.9	12842.6	12995.9
MitomiProbe_mut_1276	CGGGGTTAAGTTTGCAAGGTGGGTGGCTTGCAGCAG	4413.45	4403.12	4330.26	3989.68
MitomiProbe_mut_1277	CGGGGTTAAGTTTGCAATGTGGGTGGCTTGCAGCAG	6027.21	5319.28	5837.11	5344.34
MitomiProbe_mut_1278	CGGGGTTAAGTTTGCACAGTGGGTGGCTTGCAGCAG	5217.14	4519.46	4438.88	4298.25
MitomiProbe_mut_1279	CGGGGTTAAGTTTGCACCGTGGGTGGCTTGCAGCAG	7600.81	7157.42	8029.94	8012.19
MitomiProbe_mut_128	AAAGCGGTAATTTGCTCCGTGGGTGCAGATATCTAT	5280.26	5077.81	4625.09	5673.19
MitomiProbe_mut_1280	CGGGGTTAAGTTTGCACGGTGGGTGGCTTGCAGCAG	8180.01	6095.08	6923.79	5774.87
MitomiProbe_mut_1281	CGGGGTTAAGTTTGCACTGTGGGTGGCTTGCAGCAG	5052.04	3578.73	4030.48	3767.46
MitomiProbe_mut_1282	CGGGGTTAAGTTTGCAGAGTGGGTGGCTTGCAGCAG	4341.52	3833.59	4219.07	3876.95
MitomiProbe_mut_1283	CGGGGTTAAGTTTGCAGCGTGGGTGGCTTGCAGCAG	9405.83	6738.84	8211.93	8518.15
MitomiProbe_mut_1284	CGGGGTTAAGTTTGCAGGGTGGGTGGCTTGCAGCAG	5182.09	4395.72	4610.08	4112.06
MitomiProbe_mut_1285	CGGGGTTAAGTTTGCAGTGTGGGTGGCTTGCAGCAG	6094.93	4839.79	4663.61	4965.19
MitomiProbe_mut_1286	CGGGGTTAAGTTTGCATAGTGGGTGGCTTGCAGCAG	5095.37	4313.19	4405.98	4086.02
MitomiProbe_mut_1287	CGGGGTTAAGTTTGCATCGTGGGTGGCTTGCAGCAG	10040.5	8176.64	9216.84	9310.62
MitomiProbe_mut_1288	CGGGGTTAAGTTTGCATGGTGGGTGGCTTGCAGCAG	6223.45	4592.57	5097.88	4640.42
MitomiProbe_mut_1289	CGGGGTTAAGTTTGCATTGTGGGTGGCTTGCAGCAG	6189.61	5341.27	5134.48	4766.11
MitomiProbe_mut_129	AAAGCGGTAATTTGCTCGGTGGGTGCAGATATCTAT	3888	3423.54	2956.66	3471.65
MitomiProbe_mut_1290	CGGGGTTAAGTTTGCCAAGTGGGTGGCTTGCAGCAG	4229.62	3399.29	3797.59	4208.87
MitomiProbe_mut_1291	CGGGGTTAAGTTTGCCACGTGGGTGGCTTGCAGCAG	17375.6	17085.5	16078.2	17731.4
MitomiProbe_mut_1292	CGGGGTTAAGTTTGCCACGTGTTTTGCTTGCAGCAG	16581.5	12468.4	15669	15787.1
MitomiProbe_mut_1293	CGGGGTTAAGTTTGCCAGGTGGGTGGCTTGCAGCAG	5865.23	4663.86	5178.42	4710.09
MitomiProbe_mut_1294	CGGGGTTAAGTTTGCCATGTGGGTGGCTTGCAGCAG	11136.5	9842.21	9777.02	11461.1
MitomiProbe_mut_1295	CGGGGTTAAGTTTGCCCAGTGGGTGGCTTGCAGCAG	4646.6	3609.49	3476.42	3464.68
MitomiProbe_mut_1296	CGGGGTTAAGTTTGCCCCGTGGGTGGCTTGCAGCAG	11299	9812.7	10014.5	10927.8
MitomiProbe_mut_1297	CGGGGTTAAGTTTGCCCGGTGGGTGGCTTGCAGCAG	5181.25	3781.42	4356.76	3751.97
MitomiProbe_mut_1298	CGGGGTTAAGTTTGCCCTGTGGGTGGCTTGCAGCAG	5502.4	4170.58	4397.77	4360.94
MitomiProbe_mut_1299	CGGGGTTAAGTTTGCCGAGTGGGTGGCTTGCAGCAG	4708.34	4083.08	4355.16	4165.63
MitomiProbe_mut_13	AAAGCGGTAATTTGAACAGTGGGTGCAGATATCTAT	3808.98	3167.5	3051.72	3589.98
MitomiProbe_mut_130	AAAGCGGTAATTTGCTCTGTGGGTGCAGATATCTAT	4070.52	3610.38	2961.47	3688.11
MitomiProbe_mut_1300	CGGGGTTAAGTTTGCCGCGTGGGTGGCTTGCAGCAG	10548.9	9817.01	10227.8	10763.3
MitomiProbe_mut_1301	CGGGGTTAAGTTTGCCGGGTGGGTGGCTTGCAGCAG	5298	4230.07	4255.7	3800.16
MitomiProbe_mut_1302	CGGGGTTAAGTTTGCCGTGTGGGTGGCTTGCAGCAG	5374.16	5010.77	5327.03	4733.58
MitomiProbe_mut_1303	CGGGGTTAAGTTTGCCTAGTGGGTGGCTTGCAGCAG	4418.52	3726.57	4280.52	4038.91
MitomiProbe_mut_1304	CGGGGTTAAGTTTGCCTCGTGGGTGGCTTGCAGCAG	12238.3	12107.6	10659.6	13016.3
MitomiProbe_mut_1305	CGGGGTTAAGTTTGCCTGGTGGGTGGCTTGCAGCAG	3967.81	3677.79	3868.77	3747.36
MitomiProbe_mut_1306	CGGGGTTAAGTTTGCCTTGTGGGTGGCTTGCAGCAG	6288.48	4670.76	4938.75	4764.75
MitomiProbe_mut_1307	CGGGGTTAAGTTTGCGAAGTGGGTGGCTTGCAGCAG	4904.68	3557.94	3544.87	3546.1
MitomiProbe_mut_1308	CGGGGTTAAGTTTGCGACGTGGGTGGCTTGCAGCAG	6400.03	5511.69	6686.49	6117.31
MitomiProbe_mut_1309	CGGGGTTAAGTTTGCGAGGTGGGTGGCTTGCAGCAG	4582.59	3811.35	4104.43	3998.4
MitomiProbe_mut_131	AAAGCGGTAATTTGCTGAGTGGGTGCAGATATCTAT	4040.7	4043.54	3534.52	3794.49
MitomiProbe_mut_1310	CGGGGTTAAGTTTGCGATGTGGGTGGCTTGCAGCAG	5019.25	3964.83	4232.37	3871.5
MitomiProbe_mut_1311	CGGGGTTAAGTTTGCGCAGTGGGTGGCTTGCAGCAG	4901.72	4296.48	4098.32	3743.25
MitomiProbe_mut_1312	CGGGGTTAAGTTTGCGCCGTGGGTGGCTTGCAGCAG	6009.62	4932.36	5137.92	5098.88
MitomiProbe_mut_1313	CGGGGTTAAGTTTGCGCGGTGGGTGGCTTGCAGCAG	5086.18	4608.9	4055.79	4115.19
MitomiProbe_mut_1314	CGGGGTTAAGTTTGCGCTGTGGGTGGCTTGCAGCAG	4364.69	3633.31	3878.48	3803.34
MitomiProbe_mut_1315	CGGGGTTAAGTTTGCGGAGTGGGTGGCTTGCAGCAG	4208.24	3682.32	3811.27	3697.5
MitomiProbe_mut_1316	CGGGGTTAAGTTTGCGGCGTGGGTGGCTTGCAGCAG	8671.2	6981.74	7614.7	7605.12
MitomiProbe_mut_1317	CGGGGTTAAGTTTGCGGGGTGGGTGGCTTGCAGCAG	5473.66	4711.83	4557.79	3890.85
MitomiProbe_mut_1318	CGGGGTTAAGTTTGCGGTGTGGGTGGCTTGCAGCAG	5864.29	4856.45	5202.2	4625.16
MitomiProbe_mut_1319	CGGGGTTAAGTTTGCGTAGTGGGTGGCTTGCAGCAG	4661.8	3433.54	3728.8	3805.6
MitomiProbe_mut_132	AAAGCGGTAATTTGCTGCGTGGGTGCAGATATCTAT	8271.44	7175.25	7327.83	8618.55
MitomiProbe_mut_1320	CGGGGTTAAGTTTGCGTCGTGGGTGGCTTGCAGCAG	7660.53	6923.61	7198.89	7956.11
MitomiProbe_mut_1321	CGGGGTTAAGTTTGCGTGGTGGGTGGCTTGCAGCAG	6384.73	5423.43	5272.11	5293.1
MitomiProbe_mut_1322	CGGGGTTAAGTTTGCGTTGTGGGTGGCTTGCAGCAG	5162.42	4078.12	4588.78	4319.19
MitomiProbe_mut_1323	CGGGGTTAAGTTTGCTAAGTGGGTGGCTTGCAGCAG	4973.38	4537.84	4073.19	3811.03
MitomiProbe_mut_1324	CGGGGTTAAGTTTGCTACGTGGGTGGCTTGCAGCAG	7595.21	6756	7365.56	7570.24
MitomiProbe_mut_1325	CGGGGTTAAGTTTGCTAGGTGGGTGGCTTGCAGCAG	4639.77	3887.98	4185.97	3823.49
MitomiProbe_mut_1326	CGGGGTTAAGTTTGCTATGTGGGTGGCTTGCAGCAG	5123.87	3838.77	4566.81	4050.61
MitomiProbe_mut_1327	CGGGGTTAAGTTTGCTCAGTGGGTGGCTTGCAGCAG	3963.64	3177	3423.46	3538.72
MitomiProbe_mut_1328	CGGGGTTAAGTTTGCTCCGTGGGTGGCTTGCAGCAG	5432.45	4454.74	4983.85	5561.46
MitomiProbe_mut_1329	CGGGGTTAAGTTTGCTCGGTGGGTGGCTTGCAGCAG	4805.53	3417.88	3476.96	3482.82
MitomiProbe_mut_133	AAAGCGGTAATTTGCTGGGTGGGTGCAGATATCTAT	4339.68	3636.64	3264.79	3817.85
MitomiProbe_mut_1330	CGGGGTTAAGTTTGCTCTGTGGGTGGCTTGCAGCAG	4916.09	3871.37	3619.34	3805.05
MitomiProbe_mut_1331	CGGGGTTAAGTTTGCTGAGTGGGTGGCTTGCAGCAG	4780.16	3636.28	4077.74	3844.16
MitomiProbe_mut_1332	CGGGGTTAAGTTTGCTGCGTGGGTGGCTTGCAGCAG	8575.61	7555.88	6805.3	8595.58
MitomiProbe_mut_1333	CGGGGTTAAGTTTGCTGGGTGGGTGGCTTGCAGCAG	4498.88	4203.12	4032.19	3704.63
MitomiProbe_mut_1334	CGGGGTTAAGTTTGCTGTGTGGGTGGCTTGCAGCAG	5380.4	4730.61	4818.39	4678.35
MitomiProbe_mut_1335	CGGGGTTAAGTTTGCTTAGTGGGTGGCTTGCAGCAG	4288.92	3733.92	3411.58	3597.39
MitomiProbe_mut_1336	CGGGGTTAAGTTTGCTTCGTGGGTGGCTTGCAGCAG	6713.91	6365.26	6361.53	6731.88
MitomiProbe_mut_1337	CGGGGTTAAGTTTGCTTGGTGGGTGGCTTGCAGCAG	4290.37	3291.39	3864.77	3518.35
MitomiProbe_mut_1338	CGGGGTTAAGTTTGCTTTGTGGGTGGCTTGCAGCAG	4556.83	3704.17	4207.55	3873.5
MitomiProbe_mut_1339	CGGGGTTAAGTTTGGAAAGTGGGTGGCTTGCAGCAG	4573.81	3633.81	3685.45	3385.99
MitomiProbe_mut_134	AAAGCGGTAATTTGCTGTGTGGGTGCAGATATCTAT	4929.02	4517.85	4242.75	4355.85
MitomiProbe_mut_1340	CGGGGTTAAGTTTGGAACGTGGGTGGCTTGCAGCAG	12766.3	11291.7	11864.9	14391
MitomiProbe_mut_1341	CGGGGTTAAGTTTGGAAGGTGGGTGGCTTGCAGCAG	5552.08	4075.1	4175.51	4082.61
MitomiProbe_mut_1342	CGGGGTTAAGTTTGGAATGTGGGTGGCTTGCAGCAG	5480.41	5090.04	5616.2	5121.7
MitomiProbe_mut_1343	CGGGGTTAAGTTTGGACAGTGGGTGGCTTGCAGCAG	4635.3	4226.75	3815.26	3622.81
MitomiProbe_mut_1344	CGGGGTTAAGTTTGGACCGTGGGTGGCTTGCAGCAG	8674.24	7264.83	7348.4	7020.11
MitomiProbe_mut_1345	CGGGGTTAAGTTTGGACGGTGGGTGGCTTGCAGCAG	4337.16	4029.69	4065.85	3793
MitomiProbe_mut_1346	CGGGGTTAAGTTTGGACTGTGGGTGGCTTGCAGCAG	5449.55	3617.46	4042.3	3808.22
MitomiProbe_mut_1347	CGGGGTTAAGTTTGGAGAGTGGGTGGCTTGCAGCAG	4522.26	3692.22	4159.59	3816.12
MitomiProbe_mut_1348	CGGGGTTAAGTTTGGAGCGTGGGTGGCTTGCAGCAG	8548.35	7055.98	7049.29	7436.79
MitomiProbe_mut_1349	CGGGGTTAAGTTTGGAGGGTGGGTGGCTTGCAGCAG	5239.68	4409.02	4531.03	3836.67
MitomiProbe_mut_135	AAAGCGGTAATTTGCTTAGTGGGTGCAGATATCTAT	3744.6	3341.9	3290.93	3491.18
MitomiProbe_mut_1350	CGGGGTTAAGTTTGGAGTGTGGGTGGCTTGCAGCAG	5428.28	4161.01	5210.39	4591.94
MitomiProbe_mut_1351	CGGGGTTAAGTTTGGATAGTGGGTGGCTTGCAGCAG	4501.37	4394.18	3953.24	3815.91
MitomiProbe_mut_1352	CGGGGTTAAGTTTGGATCGTGGGTGGCTTGCAGCAG	8239.22	7592.14	8000	7505.03
MitomiProbe_mut_1353	CGGGGTTAAGTTTGGATGGTGGGTGGCTTGCAGCAG	4946.65	4814.41	3983.15	3615.65
MitomiProbe_mut_1354	CGGGGTTAAGTTTGGATTGTGGGTGGCTTGCAGCAG	4435.61	3987.11	4114.75	3939.44
MitomiProbe_mut_1355	CGGGGTTAAGTTTGGCAAGTGGGTGGCTTGCAGCAG	4739.05	4414.13	4174.78	3698.19
MitomiProbe_mut_1356	CGGGGTTAAGTTTGGCACGTGGGTGGCTTGCAGCAG	18847.3	16650.1	17411	14815.2
MitomiProbe_mut_1357	CGGGGTTAAGTTTGGCACGTGTTTTGCTTGCAGCAG	13242.1	12913.8	12964.1	14932.4
MitomiProbe_mut_1358	CGGGGTTAAGTTTGGCAGGTGGGTGGCTTGCAGCAG	7955.19	5791.4	6292.72	5411.6
MitomiProbe_mut_1359	CGGGGTTAAGTTTGGCATGTGGGTGGCTTGCAGCAG	11915	9493.61	9433.37	9993.36
MitomiProbe_mut_136	AAAGCGGTAATTTGCTTCGTGGGTGCAGATATCTAT	6445.36	5902.38	5992.58	6181.37
MitomiProbe_mut_1360	CGGGGTTAAGTTTGGCCAGTGGGTGGCTTGCAGCAG	4481.52	3208.36	4282.66	3533.08
MitomiProbe_mut_1361	CGGGGTTAAGTTTGGCCCGTGGGTGGCTTGCAGCAG	9184.04	6972.14	8388.58	8681.04
MitomiProbe_mut_1362	CGGGGTTAAGTTTGGCCGGTGGGTGGCTTGCAGCAG	4553.95	3143.04	4177.7	3826.87
MitomiProbe_mut_1363	CGGGGTTAAGTTTGGCCTGTGGGTGGCTTGCAGCAG	4607.64	4314.95	4185.3	3798.18
MitomiProbe_mut_1364	CGGGGTTAAGTTTGGCGAGTGGGTGGCTTGCAGCAG	4309.59	3623.04	4012.73	3918.98
MitomiProbe_mut_1365	CGGGGTTAAGTTTGGCGCGTGGGTGGCTTGCAGCAG	11233.6	10225.8	9916.62	9857.01
MitomiProbe_mut_1366	CGGGGTTAAGTTTGGCGGGTGGGTGGCTTGCAGCAG	5134.05	4553.18	4618.24	3956.56
MitomiProbe_mut_1367	CGGGGTTAAGTTTGGCGTGTGGGTGGCTTGCAGCAG	6144.54	5037.5	5541.4	5364.74
MitomiProbe_mut_1368	CGGGGTTAAGTTTGGCTAGTGGGTGGCTTGCAGCAG	4820.19	3914.12	3774.88	3803.71
MitomiProbe_mut_1369	CGGGGTTAAGTTTGGCTCGTGGGTGGCTTGCAGCAG	10887.9	9363.5	10658.4	11665.6
MitomiProbe_mut_137	AAAGCGGTAATTTGCTTGGTGGGTGCAGATATCTAT	3545.94	2678.67	2815.01	3731.89
MitomiProbe_mut_1370	CGGGGTTAAGTTTGGCTGGTGGGTGGCTTGCAGCAG	4526.02	4465.83	4127.05	3924.38
MitomiProbe_mut_1371	CGGGGTTAAGTTTGGCTTGTGGGTGGCTTGCAGCAG	5315.1	4182.91	4508.26	4235.65
MitomiProbe_mut_1372	CGGGGTTAAGTTTGGGAAGTGGGTGGCTTGCAGCAG	4778.62	3424.94	3651.56	3577.61
MitomiProbe_mut_1373	CGGGGTTAAGTTTGGGACGTGGGTGGCTTGCAGCAG	7588.32	5928.52	6391.86	6175.42
MitomiProbe_mut_1374	CGGGGTTAAGTTTGGGAGGTGGGTGGCTTGCAGCAG	4855.47	4161.56	4064.02	3814.42
MitomiProbe_mut_1375	CGGGGTTAAGTTTGGGATGTGGGTGGCTTGCAGCAG	4859.99	4112.58	4258.1	3894.87
MitomiProbe_mut_1376	CGGGGTTAAGTTTGGGCAGTGGGTGGCTTGCAGCAG	4658.44	3895.77	3630.1	3620.3
MitomiProbe_mut_1377	CGGGGTTAAGTTTGGGCCGTGGGTGGCTTGCAGCAG	5590.81	4494.49	5568.22	4827.38
MitomiProbe_mut_1378	CGGGGTTAAGTTTGGGCGGTGGGTGGCTTGCAGCAG	4912.14	3920.13	3928.76	3633.11
MitomiProbe_mut_1379	CGGGGTTAAGTTTGGGCTGTGGGTGGCTTGCAGCAG	4852.17	3716.1	4333.49	3654.72
MitomiProbe_mut_138	AAAGCGGTAATTTGCTTTGTGGGTGCAGATATCTAT	3830.05	3515.21	2900	3793.17
MitomiProbe_mut_1380	CGGGGTTAAGTTTGGGGAGTGGGTGGCTTGCAGCAG	5183.55	4293.59	4003.35	3962.03
MitomiProbe_mut_1381	CGGGGTTAAGTTTGGGGCGTGGGTGGCTTGCAGCAG	9337.38	7127.13	8141.03	7569.19
MitomiProbe_mut_1382	CGGGGTTAAGTTTGGGGGGTGGGTGGCTTGCAGCAG	5493.71	4489.58	4704.16	3894.02
MitomiProbe_mut_1383	CGGGGTTAAGTTTGGGGTGTGGGTGGCTTGCAGCAG	5792.53	5662.23	6411.17	5117.89
MitomiProbe_mut_1384	CGGGGTTAAGTTTGGGTAGTGGGTGGCTTGCAGCAG	4781.38	3923.01	4035.98	4108.53
MitomiProbe_mut_1385	CGGGGTTAAGTTTGGGTCGTGGGTGGCTTGCAGCAG	9266.84	7637.07	7980.65	8168.12
MitomiProbe_mut_1386	CGGGGTTAAGTTTGGGTGGTGGGTGGCTTGCAGCAG	5538.95	4777.23	4602.22	3883.69
MitomiProbe_mut_1387	CGGGGTTAAGTTTGGGTTGTGGGTGGCTTGCAGCAG	5455.5	4901.2	4676.35	4374.81
MitomiProbe_mut_1388	CGGGGTTAAGTTTGGTAAGTGGGTGGCTTGCAGCAG	4479.69	4254.52	3950.04	3737.52
MitomiProbe_mut_1389	CGGGGTTAAGTTTGGTACGTGGGTGGCTTGCAGCAG	7691.97	7463.97	8086.39	7355.29
MitomiProbe_mut_139	AAAGCGGTAATTTGGAAAGTGGGTGCAGATATCTAT	4502.49	3810.78	3311.95	3637.18
MitomiProbe_mut_1390	CGGGGTTAAGTTTGGTAGGTGGGTGGCTTGCAGCAG	4399.54	3580.91	3876.35	3544.44
MitomiProbe_mut_1391	CGGGGTTAAGTTTGGTATGTGGGTGGCTTGCAGCAG	5117.05	4705.77	4519	4308.26
MitomiProbe_mut_1392	CGGGGTTAAGTTTGGTCAGTGGGTGGCTTGCAGCAG	4322.53	3718.87	3739.23	3595.06
MitomiProbe_mut_1393	CGGGGTTAAGTTTGGTCCGTGGGTGGCTTGCAGCAG	6585.83	6093.33	6161.18	6141.89
MitomiProbe_mut_1394	CGGGGTTAAGTTTGGTCGGTGGGTGGCTTGCAGCAG	4528.9	4193.04	4120.27	3695.49
MitomiProbe_mut_1395	CGGGGTTAAGTTTGGTCTGTGGGTGGCTTGCAGCAG	4427.52	3436.16	3521.63	3794.56
MitomiProbe_mut_1396	CGGGGTTAAGTTTGGTGAGTGGGTGGCTTGCAGCAG	4969.76	4632.58	4349.35	4112.01
MitomiProbe_mut_1397	CGGGGTTAAGTTTGGTGCGTGGGTGGCTTGCAGCAG	8603.9	7307.56	8103.88	8158.28
MitomiProbe_mut_1398	CGGGGTTAAGTTTGGTGGGTGGGTGGCTTGCAGCAG	5041.6	4295.12	4300.14	3947.3
MitomiProbe_mut_1399	CGGGGTTAAGTTTGGTGTGTGGGTGGCTTGCAGCAG	5501.89	5518.36	5328.7	4860
MitomiProbe_mut_14	AAAGCGGTAATTTGAACCGTGGGTGCAGATATCTAT	7254.48	5936.5	6177.89	6443.85
MitomiProbe_mut_140	AAAGCGGTAATTTGGAACGTGGGTGCAGATATCTAT	14032.1	11935.4	13078.8	14849.3
MitomiProbe_mut_1400	CGGGGTTAAGTTTGGTTAGTGGGTGGCTTGCAGCAG	4431.31	4123.33	4056.83	3925.29
MitomiProbe_mut_1401	CGGGGTTAAGTTTGGTTCGTGGGTGGCTTGCAGCAG	6020.73	5421.4	6046.13	6395.93
MitomiProbe_mut_1402	CGGGGTTAAGTTTGGTTGGTGGGTGGCTTGCAGCAG	4989.48	4171.72	3738.14	3854.9
MitomiProbe_mut_1403	CGGGGTTAAGTTTGGTTTGTGGGTGGCTTGCAGCAG	4361.26	3803.28	3870.27	3642.44
MitomiProbe_mut_1404	CGGGGTTAAGTTTGTAAAGTGGGTGGCTTGCAGCAG	4805.07	4442.21	3974.9	3797.45
MitomiProbe_mut_1405	CGGGGTTAAGTTTGTAACGTGGGTGGCTTGCAGCAG	9986.33	7763.75	9853.88	9853.23
MitomiProbe_mut_1406	CGGGGTTAAGTTTGTAAGGTGGGTGGCTTGCAGCAG	5111.7	3842.57	3957.23	3811.42
MitomiProbe_mut_1407	CGGGGTTAAGTTTGTAATGTGGGTGGCTTGCAGCAG	5326.48	4571.52	4505.37	4137.84
MitomiProbe_mut_1408	CGGGGTTAAGTTTGTACAGTGGGTGGCTTGCAGCAG	3975.98	3415.67	3832.07	3625.58
MitomiProbe_mut_1409	CGGGGTTAAGTTTGTACCGTGGGTGGCTTGCAGCAG	5994.92	5569.36	5973.84	6194.73
MitomiProbe_mut_141	AAAGCGGTAATTTGGAAGGTGGGTGCAGATATCTAT	4584.89	4040.78	3649.13	3952.28
MitomiProbe_mut_1410	CGGGGTTAAGTTTGTACGGTGGGTGGCTTGCAGCAG	5329.01	4374.64	3938.19	3889.6
[truncated: 9,817 more rows]

## Sheet: F. Concentrations - control PBM
Design of GST-Cbf1 vs His-Cbf1 control PBM
[truncated: 9 more rows]

## Sheet: G. Full data for FigS3A
Probe Name	Probe Sequence	0.8uM GST-Cbf1	0.8uM His-Cbf1
[truncated: 10,772 more rows]

[truncated: 3 more sheets: H. Full data for FigS3B, I. PBM vs MITOMI DDG (Fig2E), J. Data for Fig2F]
