# Supplementary material for: Competition for DNA binding between paralogous transcription factors determines their genomic occupancy and regulatory functions
Source: HighWire-hosted journal article supplement (doi:10.1101/gr.275145.120), 2021-05-11
Supplement: Supplemental_Table_S3.xlsx [file Supplemental_Table_S3.xlsx]

## Sheet: README
Supplemental Table S3. In vitro and in vivo resilience for (A) Pho4, and (B) Cbf1, shown in Fig. 3C,D and Fig. 3G,H respectively.

## Sheet: A. Full data for Fig3 C, D
Probe_Name	In_Vitro_Resilience	In_Vivo_Resilience
Probes_Cbf1_Pho4_uniq_mutMax_3555	-1.13166	-0.0482021
Probes_Cbf1_Pho4_uniq_mutMax_3495	-1.03157	-1.31568
Probes_Cbf1_Pho4_uniq_mutMax_2960	-0.972785	-0.861284
Probes_Cbf1_Pho4_uniq_mutMax_1933	-0.955422	0.0504309
Probes_Cbf1_Pho4_uniq_mutMax_3856	-0.923422	-1.00063
Probes_Cbf1_Pho4_uniq_mutMax_2640	-0.911133	0.0638515
Probes_Cbf1_Pho4_uniq_mutMax_1988	-0.886234	-0.158605
Probes_Cbf1_Pho4_uniq_mutMax_4736	-0.87631	-0.3234
Probes_Cbf1_Pho4_uniq_mutMax_1767	-0.855587	0.071459
Probes_Cbf1_Pho4_uniq_mutMax_2438	-0.821519	-0.337806
Probes_Cbf1_Pho4_uniq_mutMax_310	-0.80796	0.0439631
Probes_Cbf1_Pho4_uniq_mutMax_3445	-0.803218	-0.749237
Probes_Cbf1_Pho4_uniq_mutMax_3308	-0.80006	-0.884464
Probes_Cbf1_Pho4_uniq_mutMax_2776	-0.797642	0.435318
Probes_Cbf1_Pho4_uniq_mutMax_4275	-0.792073	-0.392307
Probes_Cbf1_Pho4_uniq_mutMax_63	-0.763638	0.278713
Probes_Cbf1_Pho4_uniq_mutMax_1836	-0.759373	-0.85499
Probes_Cbf1_Pho4_uniq_mutMax_1009	-0.754964	-2.11626
Probes_Cbf1_Pho4_uniq_mutMax_4477	-0.753979	-1.26386
Probes_Cbf1_Pho4_uniq_mutMax_1815	-0.723639	-0.660141
Probes_Cbf1_Pho4_uniq_mutMax_3020	-0.717216	-0.0342891
Probes_Cbf1_Pho4_uniq_mutMax_2631	-0.699913	0.0387145
Probes_Cbf1_Pho4_uniq_mutMax_4590	-0.690786	-0.82198
Probes_Cbf1_Pho4_uniq_mutMax_2121	-0.688743	-0.177681
Probes_Cbf1_Pho4_uniq_mutMax_1213	-0.687597	0.287682
Probes_Cbf1_Pho4_uniq_mutMax_898	-0.667504	-0.699226
Probes_Cbf1_Pho4_uniq_mutMax_1945	-0.654399	-0.303381
Probes_Cbf1_Pho4_uniq_mutMax_2560	-0.650473	0.398908
Probes_Cbf1_Pho4_uniq_mutMax_3314	-0.641868	0.212175
Probes_Cbf1_Pho4_uniq_mutMax_1391	-0.639774	0.0136057
Probes_Cbf1_Pho4_uniq_mutMax_3551	-0.636389	-1.36582
Probes_Cbf1_Pho4_uniq_mutMax_1417	-0.636021	-1.18756
Probes_Cbf1_Pho4_uniq_mutMax_2128	-0.635156	-0.122602
Probes_Cbf1_Pho4_uniq_mutMax_1409	-0.632133	-0.0971637
Probes_Cbf1_Pho4_uniq_mutMax_983	-0.625878	-0.230178
Probes_Cbf1_Pho4_uniq_mutMax_4661	-0.624793	-0.109484
Probes_Cbf1_Pho4_uniq_mutMax_1444	-0.618429	-0.977619
Probes_Cbf1_Pho4_uniq_mutMax_2025	-0.614575	0.161843
Probes_Cbf1_Pho4_uniq_mutMax_2677	-0.613228	-0.546132
Probes_Cbf1_Pho4_uniq_mutMax_3684	-0.605272	-0.674455
Probes_Cbf1_Pho4_uniq_mutMax_4340	-0.603518	-2.11883
Probes_Cbf1_Pho4_uniq_mutMax_3049	-0.595262	-0.14792
Probes_Cbf1_Pho4_uniq_mutMax_4794	-0.592252	-0.182322
Probes_Cbf1_Pho4_uniq_mutMax_4512	-0.567513	0.207639
Probes_Cbf1_Pho4_uniq_mutMax_4478	-0.566504	-1.53821
Probes_Cbf1_Pho4_uniq_mutMax_1529	-0.562735	-1.4744
Probes_Cbf1_Pho4_uniq_mutMax_2297	-0.561284	-0.292478
Probes_Cbf1_Pho4_uniq_mutMax_963	-0.561087	-0.520776
Probes_Cbf1_Pho4_uniq_mutMax_1348	-0.560543	-1.32128
Probes_Cbf1_Pho4_uniq_mutMax_5104	-0.558668	0.146603
Probes_Cbf1_Pho4_uniq_mutMax_4325	-0.558428	0.411735
Probes_Cbf1_Pho4_uniq_mutMax_1392	-0.557782	-0.172613
Probes_Cbf1_Pho4_uniq_mutMax_1020	-0.553955	-1.26113
Probes_Cbf1_Pho4_uniq_mutMax_2961	-0.543777	-0.939821
Probes_Cbf1_Pho4_uniq_mutMax_4281	-0.528275	0.102049
Probes_Cbf1_Pho4_uniq_mutMax_3303	-0.527733	-2.21182
Probes_Cbf1_Pho4_uniq_mutMax_2406	-0.52201	0.0350913
Probes_Cbf1_Pho4_uniq_mutMax_3446	-0.519961	-1.47759
Probes_Cbf1_Pho4_uniq_mutMax_5088	-0.519504	0.819441
Probes_Cbf1_Pho4_uniq_mutMax_552	-0.518549	-0.498087
Probes_Cbf1_Pho4_uniq_mutMax_3304	-0.51347	-1.78318
Probes_Cbf1_Pho4_uniq_mutMax_78	-0.511851	-1.29505
Probes_Cbf1_Pho4_uniq_mutMax_833	-0.510232	0.273889
Probes_Cbf1_Pho4_uniq_mutMax_4574	-0.501128	1.26789
Probes_Cbf1_Pho4_uniq_mutMax_5059	-0.49712	0.118749
Probes_Cbf1_Pho4_uniq_mutMax_4432	-0.49406	-1.47224
Probes_Cbf1_Pho4_uniq_mutMax_3362	-0.493544	-1.29227
Probes_Cbf1_Pho4_uniq_mutMax_1232	-0.485554	0.341749
Probes_Cbf1_Pho4_uniq_mutMax_2287	-0.484931	-0.418924
Probes_Cbf1_Pho4_uniq_mutMax_1291	-0.484926	-1.02217
Probes_Cbf1_Pho4_uniq_mutMax_4115	-0.472748	0.114821
Probes_Cbf1_Pho4_uniq_mutMax_1807	-0.470582	-0.671168
Probes_Cbf1_Pho4_uniq_mutMax_3354	-0.467734	0.115513
Probes_Cbf1_Pho4_uniq_mutMax_2969	-0.467152	-0.528643
Probes_Cbf1_Pho4_uniq_mutMax_4040	-0.466261	0.0609945
Probes_Cbf1_Pho4_uniq_mutMax_2003	-0.464559	-0.0993725
Probes_Cbf1_Pho4_uniq_mutMax_2132	-0.463977	-1.46754
Probes_Cbf1_Pho4_uniq_mutMax_1790	-0.457953	-0.846055
Probes_Cbf1_Pho4_uniq_mutMax_2802	-0.457084	-1.54045
Probes_Cbf1_Pho4_uniq_mutMax_1816	-0.4559	0.204095
Probes_Cbf1_Pho4_uniq_mutMax_3499	-0.454931	-0.674026
Probes_Cbf1_Pho4_uniq_mutMax_5002	-0.44916	0.115832
Probes_Cbf1_Pho4_uniq_mutMax_1959	-0.448566	-0.784119
Probes_Cbf1_Pho4_uniq_mutMax_2803	-0.443604	-1.00594
Probes_Cbf1_Pho4_uniq_mutMax_3302	-0.439942	-2.11967
Probes_Cbf1_Pho4_uniq_mutMax_3611	-0.43892	-0.292771
Probes_Cbf1_Pho4_uniq_mutMax_124	-0.43562	-0.830931
Probes_Cbf1_Pho4_uniq_mutMax_4447	-0.431707	0.182322
Probes_Cbf1_Pho4_uniq_mutMax_5131	-0.429931	-0.219363
Probes_Cbf1_Pho4_uniq_mutMax_3309	-0.426853	-0.843266
Probes_Cbf1_Pho4_uniq_mutMax_84	-0.424131	-0.73861
Probes_Cbf1_Pho4_uniq_mutMax_2864	-0.419564	-0.980829
Probes_Cbf1_Pho4_uniq_mutMax_3010	-0.41915	0.398192
Probes_Cbf1_Pho4_uniq_mutMax_2903	-0.41842	-0.122602
Probes_Cbf1_Pho4_uniq_mutMax_3497	-0.416807	-1.0227
Probes_Cbf1_Pho4_uniq_mutMax_1564	-0.415062	-0.639746
Probes_Cbf1_Pho4_uniq_mutMax_367	-0.413443	-1.36069
Probes_Cbf1_Pho4_uniq_mutMax_2516	-0.412586	-0.219054
Probes_Cbf1_Pho4_uniq_mutMax_3063	-0.412433	-1.76155
Probes_Cbf1_Pho4_uniq_mutMax_5010	-0.411318	0.804851
Probes_Cbf1_Pho4_uniq_mutMax_4571	-0.408875	-1.41208
Probes_Cbf1_Pho4_uniq_mutMax_1099	-0.408677	-0.216223
Probes_Cbf1_Pho4_uniq_mutMax_1306	-0.405378	-1.06853
Probes_Cbf1_Pho4_uniq_mutMax_3985	-0.405063	-0.0772313
Probes_Cbf1_Pho4_uniq_mutMax_2434	-0.404965	-0.0757118
Probes_Cbf1_Pho4_uniq_mutMax_2437	-0.404181	-1.23454
Probes_Cbf1_Pho4_uniq_mutMax_1635	-0.402661	-1.04093
Probes_core_supplement_mut_180	-0.402406	0.798508
Probes_Cbf1_Pho4_uniq_mutMax_209	-0.402371	0.229574
Probes_core_supplement_mut_186	-0.40186	0.0870114
Probes_Cbf1_Pho4_uniq_mutMax_2259	-0.401078	-1.01891
Probes_core_supplement_mut_81	-0.398259	0.14994
Probes_Cbf1_Pho4_uniq_mutMax_1095	-0.396405	0.0122701
Probes_Cbf1_Pho4_uniq_mutMax_989	-0.393383	-0.204794
Probes_Cbf1_Pho4_uniq_mutMax_2476	-0.392619	0.613104
Probes_Cbf1_Pho4_uniq_mutMax_2393	-0.391515	0.396415
Probes_Cbf1_Pho4_uniq_mutMax_4645	-0.391112	-0.5738
Probes_Cbf1_Pho4_uniq_mutMax_4476	-0.388733	-0.612581
Probes_Cbf1_Pho4_uniq_mutMax_5188	-0.388575	-0.868171
Probes_Cbf1_Pho4_uniq_mutMax_427	-0.388446	-0.628609
Probes_Cbf1_Pho4_uniq_mutMax_4677	-0.384826	0.70002
Probes_Cbf1_Pho4_uniq_mutMax_866	-0.37834	0.0452566
Probes_Cbf1_Pho4_uniq_mutMax_2833	-0.37812	-1.01066
Probes_Cbf1_Pho4_uniq_mutMax_614	-0.375824	0.31612
Probes_core_supplement_mut_77	-0.372766	-0.473784
Probes_Cbf1_Pho4_uniq_mutMax_2040	-0.371887	0.607492
Probes_Cbf1_Pho4_uniq_mutMax_3960	-0.370412	0.591364
Probes_Cbf1_Pho4_uniq_mutMax_2656	-0.368882	-0.276253
Probes_Cbf1_Pho4_uniq_mutMax_3174	-0.368395	0.930475
Probes_Cbf1_Pho4_uniq_mutMax_1190	-0.36772	-1.66208
Probes_Cbf1_Pho4_uniq_mutMax_2134	-0.366299	-0.140147
Probes_Cbf1_Pho4_uniq_mutMax_3778	-0.365413	-0.345746
Probes_Cbf1_Pho4_uniq_mutMax_1024	-0.363881	0.572069
Probes_Cbf1_Pho4_uniq_mutMax_2909	-0.362066	0.472359
Probes_Cbf1_Pho4_uniq_mutMax_553	-0.362014	-0.693147
Probes_Cbf1_Pho4_uniq_mutMax_2552	-0.360823	-1.72299
Probes_Cbf1_Pho4_uniq_mutMax_4930	-0.358889	-1.17055
Probes_Cbf1_Pho4_uniq_mutMax_2813	-0.357122	-0.934309
Probes_Cbf1_Pho4_uniq_mutMax_4036	-0.355309	-0.134819
Probes_Cbf1_Pho4_uniq_mutMax_2202	-0.355177	0.453474
Probes_Cbf1_Pho4_uniq_mutMax_1610	-0.35387	-1.37913
Probes_Cbf1_Pho4_uniq_mutMax_493	-0.352444	-1.10948
Probes_Cbf1_Pho4_uniq_mutMax_4979	-0.35163	0.726171
Probes_Cbf1_Pho4_uniq_mutMax_1393	-0.351522	-0.295117
Probes_Cbf1_Pho4_uniq_mutMax_1051	-0.351239	0.125577
Probes_Cbf1_Pho4_uniq_mutMax_2606	-0.350028	-0.035932
Probes_Cbf1_Pho4_uniq_mutMax_987	-0.34782	0.0722449
Probes_Cbf1_Pho4_uniq_mutMax_4208	-0.344994	0.924949
Probes_Cbf1_Pho4_uniq_mutMax_2595	-0.344935	-0.851938
Probes_Cbf1_Pho4_uniq_mutMax_979	-0.343496	-0.0369435
Probes_Cbf1_Pho4_uniq_mutMax_2871	-0.342735	-0.463573
Probes_Cbf1_Pho4_uniq_mutMax_1717	-0.342134	-1.08744
Probes_Cbf1_Pho4_uniq_mutMax_3966	-0.341297	0.903824
Probes_Cbf1_Pho4_uniq_mutMax_3004	-0.340877	0.517257
Probes_Cbf1_Pho4_uniq_mutMax_5190	-0.339703	0.351104
Probes_Cbf1_Pho4_uniq_mutMax_4481	-0.339635	1.1906
Probes_Cbf1_Pho4_uniq_mutMax_662	-0.339348	0.0940289
Probes_Cbf1_Pho4_uniq_mutMax_4474	-0.338971	0.251938
Probes_Cbf1_Pho4_uniq_mutMax_4978	-0.338781	0.57515
Probes_Cbf1_Pho4_uniq_mutMax_4509	-0.336122	0.314115
Probes_Cbf1_Pho4_uniq_mutMax_4594	-0.335148	0.79766
Probes_Cbf1_Pho4_uniq_mutMax_1657	-0.33504	0.410503
Probes_Cbf1_Pho4_uniq_mutMax_644	-0.334032	0.0155042
Probes_Cbf1_Pho4_uniq_mutMax_3648	-0.333414	-0.168623
Probes_Cbf1_Pho4_uniq_mutMax_4755	-0.332921	-0.324953
Probes_Cbf1_Pho4_uniq_mutMax_5345	-0.332881	-0.486591
Probes_Cbf1_Pho4_uniq_mutMax_999	-0.332258	0.414682
Probes_Cbf1_Pho4_uniq_mutMax_5204	-0.331457	1.21392
Probes_Cbf1_Pho4_uniq_mutMax_2654	-0.330876	0.116637
Probes_Cbf1_Pho4_uniq_mutMax_4553	-0.330617	0.456017
Probes_Cbf1_Pho4_uniq_mutMax_4069	-0.33002	-0.257089
Probes_Cbf1_Pho4_uniq_mutMax_2551	-0.330018	-1.43089
Probes_Cbf1_Pho4_uniq_mutMax_2983	-0.329626	-0.340927
Probes_Cbf1_Pho4_uniq_mutMax_2834	-0.328849	-0.969572
Probes_Cbf1_Pho4_uniq_mutMax_1960	-0.327861	-1.3622
Probes_Cbf1_Pho4_uniq_mutMax_1663	-0.327594	0.76747
Probes_Cbf1_Pho4_uniq_mutMax_4627	-0.326126	-0.762523
Probes_Cbf1_Pho4_uniq_mutMax_2076	-0.325122	-0.573346
Probes_Cbf1_Pho4_uniq_mutMax_3107	-0.323979	-0.474739
Probes_Cbf1_Pho4_uniq_mutMax_5206	-0.323965	0.581356
Probes_Cbf1_Pho4_uniq_mutMax_2755	-0.321867	0.0143887
Probes_Cbf1_Pho4_uniq_mutMax_1637	-0.321519	0.276848
Probes_Cbf1_Pho4_uniq_mutMax_1016	-0.321286	0.702537
Probes_Cbf1_Pho4_uniq_mutMax_2179	-0.321034	-1.04648
Probes_Cbf1_Pho4_uniq_mutMax_1925	-0.317944	0.6042
Probes_Cbf1_Pho4_uniq_mutMax_1519	-0.31623	0.840783
Probes_Cbf1_Pho4_uniq_mutMax_4556	-0.314744	0.187599
Probes_Cbf1_Pho4_uniq_mutMax_4179	-0.314259	0.796782
Probes_Cbf1_Pho4_uniq_mutMax_3207	-0.314124	0.455062
Probes_Cbf1_Pho4_uniq_mutMax_2346	-0.313091	0.369217
Probes_Cbf1_Pho4_uniq_mutMax_2195	-0.313021	0.0887281
Probes_Cbf1_Pho4_uniq_mutMax_2133	-0.311532	-1.12805
Probes_Cbf1_Pho4_uniq_mutMax_692	-0.311421	0.540636
Probes_Cbf1_Pho4_uniq_mutMax_1307	-0.311086	-1.15607
Probes_core_supplement_mut_15	-0.310565	0.926762
Probes_Cbf1_Pho4_uniq_mutMax_3483	-0.310094	0.708896
Probes_Cbf1_Pho4_uniq_mutMax_1494	-0.309355	0.135341
Probes_Cbf1_Pho4_uniq_mutMax_2799	-0.309161	-0.0163491
Probes_Cbf1_Pho4_uniq_mutMax_2177	-0.307192	0.619039
Probes_Cbf1_Pho4_uniq_mutMax_4576	-0.30652	0.426879
Probes_Cbf1_Pho4_uniq_mutMax_3064	-0.30536	-0.346276
Probes_Cbf1_Pho4_uniq_mutMax_5292	-0.304934	-0.72667
Probes_Cbf1_Pho4_uniq_mutMax_290	-0.303741	0.0151518
Probes_Cbf1_Pho4_uniq_mutMax_5082	-0.303661	1.05755
Probes_Cbf1_Pho4_uniq_mutMax_5182	-0.30287	0.510826
Probes_core_supplement_mut_18	-0.300274	-0.587787
Probes_Cbf1_Pho4_uniq_mutMax_189	-0.299742	0.00766287
Probes_Cbf1_Pho4_uniq_mutMax_5252	-0.298325	-0.0152675
Probes_core_supplement_mut_23	-0.297666	-0.693147
Probes_Cbf1_Pho4_uniq_mutMax_684	-0.296282	0.578484
Probes_core_supplement_mut_113	-0.295429	0.685657
Probes_Cbf1_Pho4_uniq_mutMax_1203	-0.29536	0.149532
Probes_Cbf1_Pho4_uniq_mutMax_913	-0.294642	-0.139762
Probes_Cbf1_Pho4_uniq_mutMax_4876	-0.29	0.616186
Probes_Cbf1_Pho4_uniq_mutMax_2451	-0.289861	-1.16246
Probes_Cbf1_Pho4_uniq_mutMax_5218	-0.289502	0.0674413
Probes_Cbf1_Pho4_uniq_mutMax_440	-0.289278	0.573524
Probes_Cbf1_Pho4_uniq_mutMax_3629	-0.28823	0.796688
Probes_Cbf1_Pho4_uniq_mutMax_4949	-0.288192	0.647651
Probes_Cbf1_Pho4_uniq_mutMax_3879	-0.288138	0.644091
Probes_Cbf1_Pho4_uniq_mutMax_2372	-0.287461	0.659246
Probes_Cbf1_Pho4_uniq_mutMax_5413	-0.287156	0.957676
Probes_Cbf1_Pho4_uniq_mutMax_2943	-0.286835	0.711039
Probes_Cbf1_Pho4_uniq_mutMax_834	-0.286153	1.03609
Probes_Cbf1_Pho4_uniq_mutMax_494	-0.285195	-1.31587
Probes_Cbf1_Pho4_uniq_mutMax_2185	-0.285135	0.91992
Probes_Cbf1_Pho4_uniq_mutMax_202	-0.284877	-0.034133
Probes_Cbf1_Pho4_uniq_mutMax_5036	-0.284705	0.653142
Probes_Cbf1_Pho4_uniq_mutMax_4729	-0.284441	-0.106483
Probes_Cbf1_Pho4_uniq_mutMax_2996	-0.283999	0.815037
Probes_Cbf1_Pho4_uniq_mutMax_4018	-0.283673	0.454473
Probes_Cbf1_Pho4_uniq_mutMax_235	-0.283384	0.42216
Probes_Cbf1_Pho4_uniq_mutMax_3837	-0.283381	0.264152
Probes_Cbf1_Pho4_uniq_mutMax_3321	-0.281026	-0.343772
Probes_core_supplement_mut_150	-0.281014	0.401237
Probes_Cbf1_Pho4_uniq_mutMax_4933	-0.280607	0.923857
Probes_Cbf1_Pho4_uniq_mutMax_3085	-0.279998	0.0504309
Probes_Cbf1_Pho4_uniq_mutMax_1075	-0.279871	0.446287
Probes_Cbf1_Pho4_uniq_mutMax_1472	-0.278255	-0.609309
Probes_Cbf1_Pho4_uniq_mutMax_3348	-0.277755	1.20111
Probes_Cbf1_Pho4_uniq_mutMax_3325	-0.277633	0.065958
Probes_Cbf1_Pho4_uniq_mutMax_4180	-0.277554	-0.696368
Probes_Cbf1_Pho4_uniq_mutMax_5187	-0.27754	-0.223144
Probes_Cbf1_Pho4_uniq_mutMax_1257	-0.277261	0.735111
Probes_Cbf1_Pho4_uniq_mutMax_5042	-0.276583	0.481177
Probes_Cbf1_Pho4_uniq_mutMax_5194	-0.275495	0.856936
Probes_Cbf1_Pho4_uniq_mutMax_2487	-0.275478	0.127724
Probes_Cbf1_Pho4_uniq_mutMax_4881	-0.273107	0.796331
Probes_Cbf1_Pho4_uniq_mutMax_693	-0.272994	1.14866
Probes_Cbf1_Pho4_uniq_mutMax_4541	-0.271063	0.875469
Probes_Cbf1_Pho4_uniq_mutMax_3043	-0.270609	-1.09861
Probes_Cbf1_Pho4_uniq_mutMax_3950	-0.269523	0.866591
Probes_Cbf1_Pho4_uniq_mutMax_5272	-0.269455	0.672944
Probes_Cbf1_Pho4_uniq_mutMax_2573	-0.268801	0.347054
Probes_Cbf1_Pho4_uniq_mutMax_1210	-0.268794	-0.0145988
Probes_Cbf1_Pho4_uniq_mutMax_669	-0.268637	0.0248976
Probes_Cbf1_Pho4_uniq_mutMax_4463	-0.266758	-0.0285734
Probes_Cbf1_Pho4_uniq_mutMax_33	-0.266325	-0.257335
Probes_Cbf1_Pho4_uniq_mutMax_4302	-0.26578	0.327213
Probes_Cbf1_Pho4_uniq_mutMax_4974	-0.265134	1.1116
Probes_Cbf1_Pho4_uniq_mutMax_820	-0.264094	0.950922
Probes_Cbf1_Pho4_uniq_mutMax_1678	-0.261705	-1.04577
Probes_core_supplement_mut_234	-0.261697	0.666945
Probes_Cbf1_Pho4_uniq_mutMax_2357	-0.261231	0.552565
Probes_Cbf1_Pho4_uniq_mutMax_501	-0.260636	0.58103
Probes_Cbf1_Pho4_uniq_mutMax_2958	-0.260143	-0.869676
Probes_Cbf1_Pho4_uniq_mutMax_1185	-0.25979	-0.192684
Probes_Cbf1_Pho4_uniq_mutMax_5314	-0.259656	0.42064
Probes_Cbf1_Pho4_uniq_mutMax_2453	-0.25963	0.961411
Probes_Cbf1_Pho4_uniq_mutMax_4990	-0.259273	0.301924
Probes_Cbf1_Pho4_uniq_mutMax_2561	-0.259272	-0.047628
Probes_Cbf1_Pho4_uniq_mutMax_1828	-0.259158	-0.186877
Probes_Cbf1_Pho4_uniq_mutMax_3534	-0.258997	0.233377
Probes_Cbf1_Pho4_uniq_mutMax_2018	-0.256381	-0.354545
Probes_Cbf1_Pho4_uniq_mutMax_4528	-0.255947	0.257829
Probes_Cbf1_Pho4_uniq_mutMax_2852	-0.255004	-0.574783
Probes_Cbf1_Pho4_uniq_mutMax_1969	-0.254691	0.563962
Probes_Cbf1_Pho4_uniq_mutMax_1294	-0.251424	-0.242313
Probes_Cbf1_Pho4_uniq_mutMax_2405	-0.251251	0.150573
Probes_Cbf1_Pho4_uniq_mutMax_1731	-0.251176	0.495321
Probes_Cbf1_Pho4_uniq_mutMax_5191	-0.250804	0.138683
Probes_Cbf1_Pho4_uniq_mutMax_530	-0.250757	-0.253988
Probes_Cbf1_Pho4_uniq_mutMax_4688	-0.250503	0.551697
Probes_Cbf1_Pho4_uniq_mutMax_2596	-0.250228	-1.06232
Probes_Cbf1_Pho4_uniq_mutMax_1050	-0.249643	-0.0940289
Probes_Cbf1_Pho4_uniq_mutMax_5351	-0.249415	1.53641
Probes_Cbf1_Pho4_uniq_mutMax_2708	-0.248765	0.169899
Probes_Cbf1_Pho4_uniq_mutMax_3552	-0.24838	-1.51193
Probes_Cbf1_Pho4_uniq_mutMax_921	-0.248237	1.31755
Probes_Cbf1_Pho4_uniq_mutMax_2769	-0.248213	0.95247
Probes_Cbf1_Pho4_uniq_mutMax_1634	-0.247548	0.747872
Probes_Cbf1_Pho4_uniq_mutMax_1537	-0.246813	0.830769
Probes_Cbf1_Pho4_uniq_mutMax_2954	-0.246332	-0.192372
Probes_Cbf1_Pho4_uniq_mutMax_5058	-0.245336	0.558616
Probes_Cbf1_Pho4_uniq_mutMax_2565	-0.245225	0.758008
Probes_Cbf1_Pho4_uniq_mutMax_3774	-0.244043	0.270875
Probes_Cbf1_Pho4_uniq_mutMax_3881	-0.243284	0.0370413
Probes_Cbf1_Pho4_uniq_mutMax_1057	-0.242303	0.366625
Probes_Cbf1_Pho4_uniq_mutMax_114	-0.241707	0.397302
Probes_Cbf1_Pho4_uniq_mutMax_4684	-0.241698	0.405465
Probes_Cbf1_Pho4_uniq_mutMax_5265	-0.240923	1.0033
Probes_Cbf1_Pho4_uniq_mutMax_4365	-0.240863	0.808217
Probes_Cbf1_Pho4_uniq_mutMax_1751	-0.239311	-0.244099
Probes_Cbf1_Pho4_uniq_mutMax_2117	-0.238868	0.875469
Probes_Cbf1_Pho4_uniq_mutMax_96	-0.238688	0.717718
Probes_Cbf1_Pho4_uniq_mutMax_4786	-0.238611	0.360003
Probes_Cbf1_Pho4_uniq_mutMax_3541	-0.238531	0.212922
Probes_core_supplement_mut_188	-0.238159	1.19807
Probes_Cbf1_Pho4_uniq_mutMax_4260	-0.237072	0.418369
Probes_Cbf1_Pho4_uniq_mutMax_4420	-0.236644	-1.36636
Probes_Cbf1_Pho4_uniq_mutMax_3903	-0.236269	0.555188
Probes_Cbf1_Pho4_uniq_mutMax_4372	-0.23534	0.664437
Probes_Cbf1_Pho4_uniq_mutMax_1376	-0.234596	0.163325
Probes_Cbf1_Pho4_uniq_mutMax_1729	-0.233608	0.71295
Probes_Cbf1_Pho4_uniq_mutMax_4172	-0.233571	0.269333
Probes_Cbf1_Pho4_uniq_mutMax_1616	-0.233291	-1.64284
Probes_Cbf1_Pho4_uniq_mutMax_1467	-0.23311	0.315853
Probes_Cbf1_Pho4_uniq_mutMax_2509	-0.232069	0.371176
Probes_Cbf1_Pho4_uniq_mutMax_2582	-0.230281	-0.0294139
Probes_Cbf1_Pho4_uniq_mutMax_1301	-0.230257	0.784955
Probes_Cbf1_Pho4_uniq_mutMax_1932	-0.230245	-0.0666914
Probes_Cbf1_Pho4_uniq_mutMax_259	-0.230039	0.235314
Probes_Cbf1_Pho4_uniq_mutMax_3696	-0.229867	0.0827424
Probes_Cbf1_Pho4_uniq_mutMax_5100	-0.229647	0.0653828
Probes_Cbf1_Pho4_uniq_mutMax_1450	-0.229575	0.509627
Probes_Cbf1_Pho4_uniq_mutMax_1951	-0.228156	0.0784716
Probes_Cbf1_Pho4_uniq_mutMax_3632	-0.227875	-0.323787
Probes_Cbf1_Pho4_uniq_mutMax_724	-0.227659	0.191317
Probes_Cbf1_Pho4_uniq_mutMax_1592	-0.226841	-0.0779615
Probes_Cbf1_Pho4_uniq_mutMax_4296	-0.22678	1.10434
Probes_Cbf1_Pho4_uniq_mutMax_3938	-0.226618	0.0548082
Probes_Cbf1_Pho4_uniq_mutMax_1015	-0.225896	0.515813
Probes_core_supplement_mut_252	-0.225837	0.559616
Probes_Cbf1_Pho4_uniq_mutMax_4720	-0.225585	0.345502
Probes_Cbf1_Pho4_uniq_mutMax_1726	-0.225205	1.17093
Probes_Cbf1_Pho4_uniq_mutMax_1707	-0.224639	0.729515
Probes_Cbf1_Pho4_uniq_mutMax_4094	-0.224343	-0.14126
Probes_Cbf1_Pho4_uniq_mutMax_1461	-0.224236	-0.171148
Probes_Cbf1_Pho4_uniq_mutMax_3662	-0.223885	0.387283
Probes_Cbf1_Pho4_uniq_mutMax_2627	-0.223636	0.602633
Probes_Cbf1_Pho4_uniq_mutMax_1462	-0.223551	0.182322
Probes_Cbf1_Pho4_uniq_mutMax_1201	-0.223483	-0.036814
Probes_Cbf1_Pho4_uniq_mutMax_4089	-0.223122	0.62253
Probes_Cbf1_Pho4_uniq_mutMax_1620	-0.22277	1.02118
Probes_Cbf1_Pho4_uniq_mutMax_457	-0.222589	0.239951
Probes_Cbf1_Pho4_uniq_mutMax_2914	-0.222056	0.43979
Probes_Cbf1_Pho4_uniq_mutMax_1527	-0.221848	0.200671
Probes_Cbf1_Pho4_uniq_mutMax_2912	-0.221674	-0.506052
Probes_Cbf1_Pho4_uniq_mutMax_1814	-0.221162	-0.970358
Probes_Cbf1_Pho4_uniq_mutMax_4721	-0.220896	0.355341
Probes_Cbf1_Pho4_uniq_mutMax_5037	-0.220431	0.468266
Probes_Cbf1_Pho4_uniq_mutMax_2792	-0.219806	0.523248
Probes_Cbf1_Pho4_uniq_mutMax_1706	-0.218446	0.612295
Probes_Cbf1_Pho4_uniq_mutMax_2613	-0.218269	-0.223144
Probes_Cbf1_Pho4_uniq_mutMax_378	-0.217937	1.56143
Probes_Cbf1_Pho4_uniq_mutMax_3972	-0.216866	1.0614
Probes_Cbf1_Pho4_uniq_mutMax_2404	-0.216746	0.624828
Probes_Cbf1_Pho4_uniq_mutMax_997	-0.216612	1.67006
Probes_core_supplement_mut_97	-0.21629	-0.0333364
Probes_Cbf1_Pho4_uniq_mutMax_3939	-0.215925	-1.35812
Probes_Cbf1_Pho4_uniq_mutMax_1900	-0.215502	1.18766
Probes_Cbf1_Pho4_uniq_mutMax_1121	-0.215248	0.974301
Probes_Cbf1_Pho4_uniq_mutMax_4462	-0.21506	-1.0322
Probes_Cbf1_Pho4_uniq_mutMax_3523	-0.214381	0.264883
Probes_Cbf1_Pho4_uniq_mutMax_4598	-0.213892	0.305382
Probes_Cbf1_Pho4_uniq_mutMax_3771	-0.213859	0.545511
Probes_Cbf1_Pho4_uniq_mutMax_1101	-0.21285	-0.176351
Probes_core_supplement_mut_54	-0.212299	0.0180185
Probes_Cbf1_Pho4_uniq_mutMax_4784	-0.212203	0.950777
Probes_Cbf1_Pho4_uniq_mutMax_961	-0.212179	1.53553
Probes_Cbf1_Pho4_uniq_mutMax_4915	-0.211915	0.531015
Probes_Cbf1_Pho4_uniq_mutMax_1926	-0.211386	0.385125
Probes_Cbf1_Pho4_uniq_mutMax_697	-0.211255	1.35566
Probes_Cbf1_Pho4_uniq_mutMax_4523	-0.211022	0.394654
Probes_Cbf1_Pho4_uniq_mutMax_2362	-0.210833	-0.474894
Probes_Cbf1_Pho4_uniq_mutMax_1425	-0.210673	0.620388
Probes_Cbf1_Pho4_uniq_mutMax_5123	-0.210569	-1.33449
Probes_core_supplement_mut_176	-0.210442	0.129212
Probes_Cbf1_Pho4_uniq_mutMax_52	-0.210378	0.526591
Probes_Cbf1_Pho4_uniq_mutMax_2547	-0.210235	0.522522
Probes_Cbf1_Pho4_uniq_mutMax_3521	-0.209964	0.390993
Probes_Cbf1_Pho4_uniq_mutMax_5122	-0.209737	0.457833
Probes_Cbf1_Pho4_uniq_mutMax_1857	-0.209388	0.448549
Probes_Cbf1_Pho4_uniq_mutMax_5127	-0.208309	1.51491
Probes_Cbf1_Pho4_uniq_mutMax_2153	-0.208163	0.330742
Probes_Cbf1_Pho4_uniq_mutMax_3032	-0.208135	0.447577
Probes_Cbf1_Pho4_uniq_mutMax_894	-0.207568	0.00619197
Probes_Cbf1_Pho4_uniq_mutMax_3835	-0.20756	0.818724
Probes_core_supplement_mut_181	-0.207414	-0.144581
Probes_Cbf1_Pho4_uniq_mutMax_1122	-0.207273	1.07586
Probes_Cbf1_Pho4_uniq_mutMax_1721	-0.207197	0.866591
Probes_Cbf1_Pho4_uniq_mutMax_4346	-0.206451	0.76952
Probes_Cbf1_Pho4_uniq_mutMax_3267	-0.206449	0.183665
Probes_Cbf1_Pho4_uniq_mutMax_5304	-0.206435	0.260132
Probes_Cbf1_Pho4_uniq_mutMax_203	-0.206139	0.965081
Probes_Cbf1_Pho4_uniq_mutMax_2676	-0.205646	0.892417
Probes_Cbf1_Pho4_uniq_mutMax_1636	-0.205139	0.305382
Probes_Cbf1_Pho4_uniq_mutMax_4068	-0.204743	0.693147
Probes_Cbf1_Pho4_uniq_mutMax_4515	-0.204653	0.332706
Probes_Cbf1_Pho4_uniq_mutMax_2929	-0.203965	0.0410615
Probes_Cbf1_Pho4_uniq_mutMax_1074	-0.203198	1.01538
Probes_Cbf1_Pho4_uniq_mutMax_2632	-0.203023	0.389465
Probes_Cbf1_Pho4_uniq_mutMax_467	-0.202953	0.509509
Probes_Cbf1_Pho4_uniq_mutMax_4220	-0.202946	0.857035
Probes_Cbf1_Pho4_uniq_mutMax_2285	-0.202443	0.135802
Probes_Cbf1_Pho4_uniq_mutMax_4954	-0.202231	0.569768
Probes_Cbf1_Pho4_uniq_mutMax_661	-0.20178	0.0896122
Probes_Cbf1_Pho4_uniq_mutMax_2382	-0.201378	-0.0358095
Probes_Cbf1_Pho4_uniq_mutMax_3860	-0.201285	-0.805414
Probes_Cbf1_Pho4_uniq_mutMax_1861	-0.201133	0.557481
Probes_Cbf1_Pho4_uniq_mutMax_4883	-0.201082	1.33679
Probes_Cbf1_Pho4_uniq_mutMax_659	-0.200005	0.575738
Probes_Cbf1_Pho4_uniq_mutMax_1468	-0.199707	0.420601
Probes_Cbf1_Pho4_uniq_mutMax_3075	-0.199227	0.147781
Probes_Cbf1_Pho4_uniq_mutMax_4398	-0.19888	0.071459
Probes_Cbf1_Pho4_uniq_mutMax_2171	-0.198858	0.661731
Probes_Cbf1_Pho4_uniq_mutMax_5356	-0.198796	0.595383
Probes_Cbf1_Pho4_uniq_mutMax_4800	-0.198434	0.93827
Probes_Cbf1_Pho4_uniq_mutMax_4852	-0.19838	0.547781
Probes_Cbf1_Pho4_uniq_mutMax_2882	-0.198363	0.521297
Probes_Cbf1_Pho4_uniq_mutMax_1971	-0.197834	0.710847
Probes_Cbf1_Pho4_uniq_mutMax_2529	-0.197765	0.90029
Probes_Cbf1_Pho4_uniq_mutMax_4303	-0.196953	0.885038
Probes_Cbf1_Pho4_uniq_mutMax_3108	-0.196949	0.933288
Probes_Cbf1_Pho4_uniq_mutMax_1509	-0.19678	-0.0341914
Probes_Cbf1_Pho4_uniq_mutMax_4890	-0.196541	-0.534542
Probes_Cbf1_Pho4_uniq_mutMax_3334	-0.196194	1.0937
Probes_Cbf1_Pho4_uniq_mutMax_3159	-0.196001	0.81093
Probes_Cbf1_Pho4_uniq_mutMax_4580	-0.195685	0.0363676
Probes_Cbf1_Pho4_uniq_mutMax_1894	-0.195486	-0.199976
Probes_core_supplement_mut_275	-0.195423	0.12189
Probes_Cbf1_Pho4_uniq_mutMax_5267	-0.194712	1.01415
Probes_Cbf1_Pho4_uniq_mutMax_1135	-0.194138	0.0547011
Probes_Cbf1_Pho4_uniq_mutMax_2414	-0.193992	0.0202027
Probes_Cbf1_Pho4_uniq_mutMax_3128	-0.193015	0.117783
Probes_Cbf1_Pho4_uniq_mutMax_5241	-0.192769	1.02893
Probes_Cbf1_Pho4_uniq_mutMax_4170	-0.192761	0.553631
Probes_Cbf1_Pho4_uniq_mutMax_1140	-0.192728	0.398776
Probes_Cbf1_Pho4_uniq_mutMax_536	-0.192679	1.66034
Probes_Cbf1_Pho4_uniq_mutMax_3080	-0.1923	0.279024
Probes_Cbf1_Pho4_uniq_mutMax_3524	-0.19188	0.537954
Probes_Cbf1_Pho4_uniq_mutMax_4783	-0.191665	0.639494
Probes_Cbf1_Pho4_uniq_mutMax_650	-0.191515	0.459532
Probes_Cbf1_Pho4_uniq_mutMax_575	-0.191174	0.563272
Probes_Cbf1_Pho4_uniq_mutMax_768	-0.191091	0.11441
Probes_Cbf1_Pho4_uniq_mutMax_1727	-0.191079	-1.42382
Probes_Cbf1_Pho4_uniq_mutMax_3891	-0.190917	0.783298
Probes_Cbf1_Pho4_uniq_mutMax_5410	-0.190525	0.299085
Probes_Cbf1_Pho4_uniq_mutMax_1320	-0.19002	0.586175
Probes_Cbf1_Pho4_uniq_mutMax_1652	-0.189919	0.243788
Probes_Cbf1_Pho4_uniq_mutMax_4247	-0.189771	0.806806
Probes_Cbf1_Pho4_uniq_mutMax_3481	-0.189591	-0.599118
Probes_Cbf1_Pho4_uniq_mutMax_31	-0.189254	0.639866
Probes_Cbf1_Pho4_uniq_mutMax_4495	-0.188995	1.11696
Probes_Cbf1_Pho4_uniq_mutMax_1781	-0.188156	-0.0689929
Probes_Cbf1_Pho4_uniq_mutMax_4133	-0.18809	0.671641
Probes_Cbf1_Pho4_uniq_mutMax_3797	-0.187892	0.249812
Probes_Cbf1_Pho4_uniq_mutMax_4665	-0.187808	-0.107797
Probes_Cbf1_Pho4_uniq_mutMax_2060	-0.187458	1.07919
Probes_Cbf1_Pho4_uniq_mutMax_1773	-0.187325	0.532374
Probes_Cbf1_Pho4_uniq_mutMax_2288	-0.186686	-0.502629
Probes_Cbf1_Pho4_uniq_mutMax_1865	-0.185544	0.755948
Probes_Cbf1_Pho4_uniq_mutMax_2223	-0.185441	0.896488
Probes_Cbf1_Pho4_uniq_mutMax_2913	-0.185408	0.42028
Probes_Cbf1_Pho4_uniq_mutMax_4976	-0.185405	0.455476
Probes_Cbf1_Pho4_uniq_mutMax_5337	-0.184712	0.559616
Probes_Cbf1_Pho4_uniq_mutMax_5376	-0.184563	1.16431
Probes_Cbf1_Pho4_uniq_mutMax_1899	-0.184267	0.386561
Probes_Cbf1_Pho4_uniq_mutMax_3276	-0.183837	0.561378
Probes_Cbf1_Pho4_uniq_mutMax_2700	-0.183566	0.381368
Probes_Cbf1_Pho4_uniq_mutMax_5138	-0.182242	0.507045
Probes_Cbf1_Pho4_uniq_mutMax_3216	-0.182223	0.249942
Probes_Cbf1_Pho4_uniq_mutMax_5231	-0.182076	0.948179
Probes_Cbf1_Pho4_uniq_mutMax_1211	-0.181748	1.0455
Probes_Cbf1_Pho4_uniq_mutMax_3902	-0.18174	0.510826
Probes_Cbf1_Pho4_uniq_mutMax_3945	-0.181549	0.589469
Probes_Cbf1_Pho4_uniq_mutMax_3517	-0.181489	-0.0175958
Probes_Cbf1_Pho4_uniq_mutMax_1769	-0.181423	0.876682
Probes_Cbf1_Pho4_uniq_mutMax_5166	-0.180585	0.517582
Probes_Cbf1_Pho4_uniq_mutMax_3543	-0.180563	-0.547823
Probes_Cbf1_Pho4_uniq_mutMax_1482	-0.180553	0.0419642
Probes_core_supplement_mut_67	-0.180098	0.405465
Probes_Cbf1_Pho4_uniq_mutMax_4330	-0.17971	0.604068
Probes_Cbf1_Pho4_uniq_mutMax_1679	-0.179681	-0.0196085
Probes_Cbf1_Pho4_uniq_mutMax_3361	-0.179592	0.693147
Probes_Cbf1_Pho4_uniq_mutMax_3812	-0.179163	0.693147
Probes_Cbf1_Pho4_uniq_mutMax_1096	-0.179038	0.955511
Probes_Cbf1_Pho4_uniq_mutMax_4873	-0.178925	0.856652
Probes_core_supplement_mut_95	-0.178587	0.278203
Probes_Cbf1_Pho4_uniq_mutMax_4514	-0.178307	-0.213574
Probes_Cbf1_Pho4_uniq_mutMax_1639	-0.178247	1.17164
Probes_Cbf1_Pho4_uniq_mutMax_681	-0.177733	-0.464889
Probes_Cbf1_Pho4_uniq_mutMax_4327	-0.177316	-0.980829
Probes_Cbf1_Pho4_uniq_mutMax_1569	-0.177241	0.388223
Probes_Cbf1_Pho4_uniq_mutMax_2147	-0.177073	0.623786
Probes_core_supplement_mut_127	-0.176846	1.08545
Probes_Cbf1_Pho4_uniq_mutMax_3654	-0.176271	1.00199
Probes_Cbf1_Pho4_uniq_mutMax_2411	-0.175849	-0.161969
Probes_Cbf1_Pho4_uniq_mutMax_617	-0.175393	-0.138708
Probes_Cbf1_Pho4_uniq_mutMax_2478	-0.174136	0
Probes_Cbf1_Pho4_uniq_mutMax_3522	-0.173727	0.488664
Probes_Cbf1_Pho4_uniq_mutMax_3631	-0.173556	0.757686
Probes_Cbf1_Pho4_uniq_mutMax_2353	-0.172929	0.852777
Probes_Cbf1_Pho4_uniq_mutMax_379	-0.17275	1.47887
Probes_Cbf1_Pho4_uniq_mutMax_3076	-0.172713	-0.0338134
Probes_Cbf1_Pho4_uniq_mutMax_5224	-0.172677	1.22034
Probes_Cbf1_Pho4_uniq_mutMax_4035	-0.172598	0.200671
Probes_Cbf1_Pho4_uniq_mutMax_3783	-0.172257	0.49151
Probes_Cbf1_Pho4_uniq_mutMax_1416	-0.171395	0.562308
Probes_Cbf1_Pho4_uniq_mutMax_4505	-0.171146	0.6698
Probes_Cbf1_Pho4_uniq_mutMax_1675	-0.170945	0.693147
Probes_Cbf1_Pho4_uniq_mutMax_2458	-0.170828	0.589684
Probes_Cbf1_Pho4_uniq_mutMax_5062	-0.170502	-0.58974
Probes_Cbf1_Pho4_uniq_mutMax_2387	-0.170391	0.86628
Probes_Cbf1_Pho4_uniq_mutMax_3212	-0.170282	0.645745
Probes_Cbf1_Pho4_uniq_mutMax_2651	-0.170071	0.753772
Probes_Cbf1_Pho4_uniq_mutMax_2366	-0.169572	0.0902868
Probes_Cbf1_Pho4_uniq_mutMax_2332	-0.169391	0.549359
Probes_Cbf1_Pho4_uniq_mutMax_2625	-0.168348	-0.082148
Probes_Cbf1_Pho4_uniq_mutMax_4675	-0.167828	0.0372714
Probes_Cbf1_Pho4_uniq_mutMax_4631	-0.167282	0.22809
Probes_Cbf1_Pho4_uniq_mutMax_4848	-0.166853	0.347054
Probes_Cbf1_Pho4_uniq_mutMax_1787	-0.166687	0.332343
Probes_Cbf1_Pho4_uniq_mutMax_2705	-0.166349	-1.32338
Probes_Cbf1_Pho4_uniq_mutMax_619	-0.165969	0.681974
Probes_Cbf1_Pho4_uniq_mutMax_37	-0.165374	0.888317
Probes_Cbf1_Pho4_uniq_mutMax_1844	-0.165079	-0.4379
Probes_Cbf1_Pho4_uniq_mutMax_5338	-0.164834	0.784662
Probes_Cbf1_Pho4_uniq_mutMax_1087	-0.16289	0.770439
Probes_Cbf1_Pho4_uniq_mutMax_2222	-0.162583	0.533111
Probes_Cbf1_Pho4_uniq_mutMax_1219	-0.16185	0.380464
Probes_Cbf1_Pho4_uniq_mutMax_2275	-0.161072	0.776761
Probes_Cbf1_Pho4_uniq_mutMax_48	-0.160411	0.00566574
Probes_Cbf1_Pho4_uniq_mutMax_2797	-0.160143	-0.0914342
Probes_Cbf1_Pho4_uniq_mutMax_4884	-0.160119	0.524249
Probes_Cbf1_Pho4_uniq_mutMax_731	-0.159598	0.0155042
Probes_Cbf1_Pho4_uniq_mutMax_5073	-0.159581	1.01664
Probes_Cbf1_Pho4_uniq_mutMax_4098	-0.159474	0.465363
Probes_Cbf1_Pho4_uniq_mutMax_1583	-0.159269	0.432864
Probes_Cbf1_Pho4_uniq_mutMax_817	-0.159269	0.968737
Probes_Cbf1_Pho4_uniq_mutMax_3466	-0.15899	0.623491
Probes_Cbf1_Pho4_uniq_mutMax_1080	-0.158797	0.216223
Probes_Cbf1_Pho4_uniq_mutMax_1026	-0.158719	-0.332864
Probes_Cbf1_Pho4_uniq_mutMax_3904	-0.157924	0.631589
Probes_Cbf1_Pho4_uniq_mutMax_1003	-0.157904	-1.1955
Probes_Cbf1_Pho4_uniq_mutMax_4981	-0.157783	0.698441
Probes_Cbf1_Pho4_uniq_mutMax_2350	-0.157203	-0.195567
Probes_Cbf1_Pho4_uniq_mutMax_3866	-0.155978	0.519875
Probes_Cbf1_Pho4_uniq_mutMax_4206	-0.155602	0.693147
Probes_Cbf1_Pho4_uniq_mutMax_323	-0.155588	0.939105
Probes_Cbf1_Pho4_uniq_mutMax_2917	-0.155043	0.387766
Probes_Cbf1_Pho4_uniq_mutMax_980	-0.154834	-0.24818
Probes_Cbf1_Pho4_uniq_mutMax_3977	-0.154697	0.363163
Probes_Cbf1_Pho4_uniq_mutMax_354	-0.154153	0.203125
Probes_Cbf1_Pho4_uniq_mutMax_5374	-0.153913	0.910212
Probes_Cbf1_Pho4_uniq_mutMax_2984	-0.153839	0.604594
Probes_Cbf1_Pho4_uniq_mutMax_2386	-0.15346	0.80428
Probes_Cbf1_Pho4_uniq_mutMax_5173	-0.153234	0
Probes_Cbf1_Pho4_uniq_mutMax_5219	-0.1532	0.419854
Probes_core_supplement_mut_160	-0.153128	0.845063
Probes_Cbf1_Pho4_uniq_mutMax_1689	-0.152856	0.820981
Probes_Cbf1_Pho4_uniq_mutMax_2093	-0.152412	-0.150823
Probes_Cbf1_Pho4_uniq_mutMax_2991	-0.152381	0.87807
Probes_Cbf1_Pho4_uniq_mutMax_3818	-0.15233	1.08664
Probes_Cbf1_Pho4_uniq_mutMax_51	-0.152178	0.747898
Probes_Cbf1_Pho4_uniq_mutMax_4120	-0.152065	0.133531
Probes_Cbf1_Pho4_uniq_mutMax_1059	-0.151824	-0.212922
Probes_Cbf1_Pho4_uniq_mutMax_4597	-0.151751	0.806476
Probes_Cbf1_Pho4_uniq_mutMax_3677	-0.151667	0.605331
Probes_core_supplement_mut_148	-0.151277	0.481838
Probes_Cbf1_Pho4_uniq_mutMax_4838	-0.151046	-0.0363676
Probes_Cbf1_Pho4_uniq_mutMax_4702	-0.150568	0.744067
Probes_Cbf1_Pho4_uniq_mutMax_1681	-0.150562	0.537854
Probes_Cbf1_Pho4_uniq_mutMax_1841	-0.150484	0.236389
Probes_Cbf1_Pho4_uniq_mutMax_4770	-0.150446	0.704576
Probes_Cbf1_Pho4_uniq_mutMax_1431	-0.149741	0.161641
Probes_Cbf1_Pho4_uniq_mutMax_405	-0.149712	0.665238
Probes_Cbf1_Pho4_uniq_mutMax_2331	-0.149614	0.595349
Probes_Cbf1_Pho4_uniq_mutMax_4560	-0.149571	0.659246
Probes_core_supplement_mut_135	-0.149432	0.401441
Probes_Cbf1_Pho4_uniq_mutMax_4118	-0.149385	0.219363
Probes_Cbf1_Pho4_uniq_mutMax_4431	-0.14798	0.583948
Probes_Cbf1_Pho4_uniq_mutMax_3608	-0.147618	-0.476924
Probes_Cbf1_Pho4_uniq_mutMax_4742	-0.147556	0.598656
Probes_Cbf1_Pho4_uniq_mutMax_4793	-0.14744	-0.147325
Probes_Cbf1_Pho4_uniq_mutMax_5415	-0.147269	0.410428
Probes_Cbf1_Pho4_uniq_mutMax_4143	-0.147157	0.0263173
Probes_core_supplement_mut_11	-0.146777	0.96248
Probes_Cbf1_Pho4_uniq_mutMax_5281	-0.14668	0.158605
Probes_Cbf1_Pho4_uniq_mutMax_1656	-0.146544	0.388487
Probes_Cbf1_Pho4_uniq_mutMax_5160	-0.146505	1.511
Probes_Cbf1_Pho4_uniq_mutMax_4727	-0.146272	0.600774
Probes_Cbf1_Pho4_uniq_mutMax_4238	-0.145848	0.635989
Probes_Cbf1_Pho4_uniq_mutMax_4421	-0.145658	-0.376235
Probes_Cbf1_Pho4_uniq_mutMax_4339	-0.145611	0.37949
Probes_Cbf1_Pho4_uniq_mutMax_4178	-0.145259	0.348114
Probes_Cbf1_Pho4_uniq_mutMax_4360	-0.145161	0.332343
Probes_Cbf1_Pho4_uniq_mutMax_3919	-0.144823	-0.242012
Probes_Cbf1_Pho4_uniq_mutMax_1685	-0.144785	0.550831
Probes_Cbf1_Pho4_uniq_mutMax_3273	-0.144608	-0.16525
Probes_Cbf1_Pho4_uniq_mutMax_2964	-0.144553	0.537854
Probes_Cbf1_Pho4_uniq_mutMax_4846	-0.144515	0.494696
Probes_Cbf1_Pho4_uniq_mutMax_694	-0.14399	1.24538
Probes_Cbf1_Pho4_uniq_mutMax_3733	-0.143973	0.309565
Probes_Cbf1_Pho4_uniq_mutMax_2543	-0.143752	0.524249
Probes_Cbf1_Pho4_uniq_mutMax_2959	-0.143494	0.405465
Probes_Cbf1_Pho4_uniq_mutMax_2445	-0.143308	0.864105
Probes_Cbf1_Pho4_uniq_mutMax_822	-0.142908	0.79168
Probes_Cbf1_Pho4_uniq_mutMax_2774	-0.140986	1.18774
Probes_Cbf1_Pho4_uniq_mutMax_1418	-0.140685	-1.511
Probes_Cbf1_Pho4_uniq_mutMax_2760	-0.140199	0.103541
Probes_Cbf1_Pho4_uniq_mutMax_2100	-0.140129	0.431441
Probes_Cbf1_Pho4_uniq_mutMax_3437	-0.138873	-0.0896122
Probes_Cbf1_Pho4_uniq_mutMax_3464	-0.138327	0.37949
Probes_Cbf1_Pho4_uniq_mutMax_1097	-0.138073	0.187072
Probes_Cbf1_Pho4_uniq_mutMax_5060	-0.137479	0.548491
Probes_Cbf1_Pho4_uniq_mutMax_5223	-0.136488	0.59861
Probes_core_supplement_mut_143	-0.1364	0.405465
Probes_Cbf1_Pho4_uniq_mutMax_888	-0.136326	0.527355
Probes_Cbf1_Pho4_uniq_mutMax_5061	-0.135992	0.0415764
Probes_Cbf1_Pho4_uniq_mutMax_2342	-0.135791	0.428996
Probes_Cbf1_Pho4_uniq_mutMax_5201	-0.134946	0.540312
Probes_Cbf1_Pho4_uniq_mutMax_4867	-0.134877	0.624154
Probes_Cbf1_Pho4_uniq_mutMax_5057	-0.134717	0.522522
Probes_Cbf1_Pho4_uniq_mutMax_1156	-0.133912	0.778669
Probes_Cbf1_Pho4_uniq_mutMax_4902	-0.133722	0
Probes_Cbf1_Pho4_uniq_mutMax_4198	-0.132911	0.531304
Probes_Cbf1_Pho4_uniq_mutMax_40	-0.132654	0.206614
Probes_Cbf1_Pho4_uniq_mutMax_3620	-0.132369	0.175204
Probes_Cbf1_Pho4_uniq_mutMax_2049	-0.132286	1.03471
Probes_Cbf1_Pho4_uniq_mutMax_45	-0.13223	0.248896
Probes_Cbf1_Pho4_uniq_mutMax_3859	-0.131994	-0.410915
Probes_Cbf1_Pho4_uniq_mutMax_825	-0.131856	0.475669
Probes_Cbf1_Pho4_uniq_mutMax_5240	-0.131727	1.20291
Probes_Cbf1_Pho4_uniq_mutMax_2167	-0.131571	0.495077
Probes_Cbf1_Pho4_uniq_mutMax_3850	-0.131493	1.46655
Probes_core_supplement_mut_164	-0.130914	-0.231802
Probes_Cbf1_Pho4_uniq_mutMax_32	-0.130862	-0.014493
Probes_Cbf1_Pho4_uniq_mutMax_4579	-0.130409	0.804851
Probes_Cbf1_Pho4_uniq_mutMax_5379	-0.130036	0.124703
Probes_Cbf1_Pho4_uniq_mutMax_2428	-0.129652	1.01459
Probes_Cbf1_Pho4_uniq_mutMax_1171	-0.129639	0.898999
Probes_Cbf1_Pho4_uniq_mutMax_6	-0.129008	0.34484
Probes_Cbf1_Pho4_uniq_mutMax_2277	-0.128989	0.047006
Probes_Cbf1_Pho4_uniq_mutMax_878	-0.12867	0.894432
Probes_Cbf1_Pho4_uniq_mutMax_3854	-0.128632	1.42247
Probes_core_supplement_mut_280	-0.128026	-0.125163
Probes_core_supplement_mut_102	-0.127348	0
Probes_Cbf1_Pho4_uniq_mutMax_4424	-0.127063	0.388936
Probes_Cbf1_Pho4_uniq_mutMax_2400	-0.126822	0.559616
Probes_Cbf1_Pho4_uniq_mutMax_2455	-0.126432	0.0921788
Probes_Cbf1_Pho4_uniq_mutMax_2674	-0.126406	0.454619
Probes_Cbf1_Pho4_uniq_mutMax_4342	-0.126394	0.254326
Probes_Cbf1_Pho4_uniq_mutMax_1063	-0.126021	0.0721033
Probes_Cbf1_Pho4_uniq_mutMax_573	-0.125902	0.234193
Probes_Cbf1_Pho4_uniq_mutMax_3773	-0.125545	0.307154
Probes_Cbf1_Pho4_uniq_mutMax_2759	-0.125457	0.169899
Probes_Cbf1_Pho4_uniq_mutMax_1157	-0.125375	0.534457
Probes_Cbf1_Pho4_uniq_mutMax_3869	-0.125056	0.630409
Probes_Cbf1_Pho4_uniq_mutMax_2061	-0.125044	0.682995
Probes_Cbf1_Pho4_uniq_mutMax_2538	-0.124869	0.984344
Probes_Cbf1_Pho4_uniq_mutMax_5232	-0.124772	0.605206
Probes_Cbf1_Pho4_uniq_mutMax_2921	-0.123851	-0.169899
Probes_Cbf1_Pho4_uniq_mutMax_2566	-0.123785	-0.0870114
Probes_Cbf1_Pho4_uniq_mutMax_1867	-0.123711	-0.474458
Probes_Cbf1_Pho4_uniq_mutMax_5175	-0.123295	0.154151
Probes_Cbf1_Pho4_uniq_mutMax_3693	-0.122872	0.71295
Probes_Cbf1_Pho4_uniq_mutMax_2583	-0.122735	0.527355
Probes_Cbf1_Pho4_uniq_mutMax_2600	-0.122059	-0.409307
Probes_Cbf1_Pho4_uniq_mutMax_884	-0.12202	0.81575
Probes_Cbf1_Pho4_uniq_mutMax_280	-0.121963	0.0870114
Probes_Cbf1_Pho4_uniq_mutMax_2198	-0.12161	0.36936
Probes_Cbf1_Pho4_uniq_mutMax_912	-0.121519	0.65569
Probes_Cbf1_Pho4_uniq_mutMax_3142	-0.121208	0.4959
Probes_Cbf1_Pho4_uniq_mutMax_4557	-0.121097	0.822359
Probes_Cbf1_Pho4_uniq_mutMax_5064	-0.121087	0.775212
Probes_Cbf1_Pho4_uniq_mutMax_5211	-0.120663	-0.0881073
Probes_Cbf1_Pho4_uniq_mutMax_4438	-0.120559	0.763863
Probes_Cbf1_Pho4_uniq_mutMax_4690	-0.120496	0.619039
Probes_Cbf1_Pho4_uniq_mutMax_3422	-0.120214	0.93827
Probes_Cbf1_Pho4_uniq_mutMax_994	-0.120057	0.635989
Probes_Cbf1_Pho4_uniq_mutMax_2549	-0.119129	0.293547
Probes_Cbf1_Pho4_uniq_mutMax_5394	-0.118421	0.80188
Probes_Cbf1_Pho4_uniq_mutMax_4088	-0.117378	0.156569
Probes_core_supplement_mut_193	-0.117114	0.274437
Probes_Cbf1_Pho4_uniq_mutMax_3326	-0.116374	0.942043
Probes_Cbf1_Pho4_uniq_mutMax_2308	-0.116325	0.626456
Probes_Cbf1_Pho4_uniq_mutMax_1935	-0.116154	-0.0492269
Probes_Cbf1_Pho4_uniq_mutMax_3685	-0.116016	0.793231
Probes_Cbf1_Pho4_uniq_mutMax_5130	-0.115698	0.339868
Probes_Cbf1_Pho4_uniq_mutMax_1810	-0.115129	0.541131
Probes_Cbf1_Pho4_uniq_mutMax_1898	-0.115074	0.00865806
Probes_core_supplement_mut_225	-0.114918	0.428996
Probes_Cbf1_Pho4_uniq_mutMax_4607	-0.114202	0.875469
Probes_Cbf1_Pho4_uniq_mutMax_424	-0.113829	0.530628
Probes_Cbf1_Pho4_uniq_mutMax_3137	-0.113647	0.721318
Probes_Cbf1_Pho4_uniq_mutMax_2499	-0.113389	0.232332
Probes_Cbf1_Pho4_uniq_mutMax_3249	-0.113359	1.12863
Probes_Cbf1_Pho4_uniq_mutMax_4086	-0.113262	0.707746
Probes_Cbf1_Pho4_uniq_mutMax_4028	-0.113239	-0.128617
Probes_Cbf1_Pho4_uniq_mutMax_1216	-0.112936	0.259511
Probes_Cbf1_Pho4_uniq_mutMax_2696	-0.112494	0.493658
Probes_Cbf1_Pho4_uniq_mutMax_215	-0.112183	0.451007
Probes_Cbf1_Pho4_uniq_mutMax_1584	-0.112134	0.394883
Probes_Cbf1_Pho4_uniq_mutMax_2684	-0.111824	0.353279
Probes_Cbf1_Pho4_uniq_mutMax_3755	-0.11175	0.916291
Probes_Cbf1_Pho4_uniq_mutMax_695	-0.11174	1.1474
Probes_Cbf1_Pho4_uniq_mutMax_5146	-0.111417	0.776761
Probes_Cbf1_Pho4_uniq_mutMax_4271	-0.111189	0.699153
Probes_Cbf1_Pho4_uniq_mutMax_1879	-0.111001	0.663547
Probes_Cbf1_Pho4_uniq_mutMax_1772	-0.110923	0.661059
Probes_Cbf1_Pho4_uniq_mutMax_3252	-0.110908	0.57581
Probes_Cbf1_Pho4_uniq_mutMax_1511	-0.110835	0.654433
Probes_Cbf1_Pho4_uniq_mutMax_2309	-0.110599	0.461346
Probes_Cbf1_Pho4_uniq_mutMax_3188	-0.110014	0.487382
Probes_Cbf1_Pho4_uniq_mutMax_3165	-0.109356	1.03062
Probes_Cbf1_Pho4_uniq_mutMax_5342	-0.109282	0.459532
Probes_Cbf1_Pho4_uniq_mutMax_2037	-0.109162	0.0953102
Probes_Cbf1_Pho4_uniq_mutMax_335	-0.108614	0.687814
Probes_Cbf1_Pho4_uniq_mutMax_2293	-0.10857	0.346999
Probes_Cbf1_Pho4_uniq_mutMax_54	-0.107975	0.601676
Probes_Cbf1_Pho4_uniq_mutMax_3345	-0.107476	0.755518
Probes_Cbf1_Pho4_uniq_mutMax_4613	-0.106779	-0.0434851
Probes_Cbf1_Pho4_uniq_mutMax_5112	-0.106696	0.561469
Probes_core_supplement_mut_277	-0.106663	0.381014
Probes_Cbf1_Pho4_uniq_mutMax_5169	-0.106592	0.366244
Probes_Cbf1_Pho4_uniq_mutMax_2380	-0.105972	0.773909
Probes_Cbf1_Pho4_uniq_mutMax_2087	-0.105939	0.0960147
Probes_Cbf1_Pho4_uniq_mutMax_3052	-0.105933	0.653301
Probes_Cbf1_Pho4_uniq_mutMax_3502	-0.105551	0.623467
Probes_Cbf1_Pho4_uniq_mutMax_978	-0.105506	0.687756
Probes_Cbf1_Pho4_uniq_mutMax_2986	-0.104531	0.455103
Probes_Cbf1_Pho4_uniq_mutMax_2205	-0.104415	0.839201
Probes_Cbf1_Pho4_uniq_mutMax_5233	-0.104384	0.466178
Probes_Cbf1_Pho4_uniq_mutMax_2211	-0.104134	0.352821
Probes_Cbf1_Pho4_uniq_mutMax_1397	-0.103308	0.0519597
Probes_Cbf1_Pho4_uniq_mutMax_2130	-0.103256	-0.213964
Probes_Cbf1_Pho4_uniq_mutMax_929	-0.103048	0.583948
Probes_Cbf1_Pho4_uniq_mutMax_24	-0.102922	0.31612
Probes_Cbf1_Pho4_uniq_mutMax_3633	-0.102561	0.684179
Probes_Cbf1_Pho4_uniq_mutMax_4274	-0.102431	0.707151
Probes_Cbf1_Pho4_uniq_mutMax_883	-0.10212	0.661398
Probes_Cbf1_Pho4_uniq_mutMax_183	-0.102048	0.458669
Probes_Cbf1_Pho4_uniq_mutMax_870	-0.101998	0.16304
Probes_Cbf1_Pho4_uniq_mutMax_1712	-0.101872	0.863692
Probes_Cbf1_Pho4_uniq_mutMax_1643	-0.101614	0.698829
Probes_Cbf1_Pho4_uniq_mutMax_447	-0.101521	0.237328
Probes_Cbf1_Pho4_uniq_mutMax_2016	-0.10146	0.145182
Probes_Cbf1_Pho4_uniq_mutMax_3874	-0.100801	0.271153
Probes_Cbf1_Pho4_uniq_mutMax_4278	-0.100403	0.182322
Probes_Cbf1_Pho4_uniq_mutMax_1275	-0.100395	0.18633
Probes_Cbf1_Pho4_uniq_mutMax_4469	-0.100271	0.377833
Probes_Cbf1_Pho4_uniq_mutMax_3906	-0.0997578	0.269824
Probes_core_supplement_mut_31	-0.0997046	0.0903841
Probes_Cbf1_Pho4_uniq_mutMax_2690	-0.0989095	-0.0253178
Probes_Cbf1_Pho4_uniq_mutMax_2152	-0.0983029	1.17412
Probes_Cbf1_Pho4_uniq_mutMax_2206	-0.0968544	0.518488
Probes_Cbf1_Pho4_uniq_mutMax_2383	-0.0968	0.369097
Probes_Cbf1_Pho4_uniq_mutMax_5370	-0.0964532	0.550455
Probes_Cbf1_Pho4_uniq_mutMax_3024	-0.0962715	0.778669
Probes_Cbf1_Pho4_uniq_mutMax_281	-0.0945882	0.522522
Probes_Cbf1_Pho4_uniq_mutMax_920	-0.0942527	1.17963
Probes_Cbf1_Pho4_uniq_mutMax_3136	-0.0940223	1.48427
Probes_Cbf1_Pho4_uniq_mutMax_5156	-0.0931003	-0.074108
Probes_Cbf1_Pho4_uniq_mutMax_4872	-0.0926735	1.18438
Probes_Cbf1_Pho4_uniq_mutMax_3151	-0.0922266	0.502728
Probes_Cbf1_Pho4_uniq_mutMax_395	-0.0920398	-0.0923733
Probes_Cbf1_Pho4_uniq_mutMax_166	-0.091647	0.532805
Probes_Cbf1_Pho4_uniq_mutMax_1271	-0.0914808	0.748207
Probes_Cbf1_Pho4_uniq_mutMax_1250	-0.0914673	0.237959
Probes_core_supplement_mut_47	-0.0910555	-0.131928
Probes_Cbf1_Pho4_uniq_mutMax_3669	-0.0906725	0.165792
Probes_Cbf1_Pho4_uniq_mutMax_4761	-0.0905091	0.135175
Probes_Cbf1_Pho4_uniq_mutMax_361	-0.0902605	0.935709
Probes_Cbf1_Pho4_uniq_mutMax_5237	-0.090075	0.955511
Probes_Cbf1_Pho4_uniq_mutMax_5003	-0.089461	0.952009
Probes_Cbf1_Pho4_uniq_mutMax_3258	-0.0890149	1.46929
Probes_Cbf1_Pho4_uniq_mutMax_1642	-0.0881912	0.806183
Probes_Cbf1_Pho4_uniq_mutMax_596	-0.0877879	0.961411
Probes_Cbf1_Pho4_uniq_mutMax_1513	-0.0871619	0.873636
Probes_core_supplement_mut_233	-0.0869915	0.191891
Probes_Cbf1_Pho4_uniq_mutMax_3525	-0.0864279	0.608854
Probes_Cbf1_Pho4_uniq_mutMax_996	-0.0863661	0.604019
Probes_Cbf1_Pho4_uniq_mutMax_4371	-0.0861054	0.902868
Probes_Cbf1_Pho4_uniq_mutMax_3051	-0.0858178	0.14197
Probes_Cbf1_Pho4_uniq_mutMax_112	-0.0854721	0.851752
Probes_Cbf1_Pho4_uniq_mutMax_2965	-0.0850108	0.699378
Probes_Cbf1_Pho4_uniq_mutMax_4256	-0.0847273	0.436556
Probes_Cbf1_Pho4_uniq_mutMax_637	-0.0845268	0.182322
Probes_Cbf1_Pho4_uniq_mutMax_3138	-0.0836058	0.802846
Probes_Cbf1_Pho4_uniq_mutMax_1018	-0.083047	0.583948
Probes_Cbf1_Pho4_uniq_mutMax_4396	-0.0829638	0.766009
Probes_core_supplement_mut_158	-0.0829044	-0.381935
Probes_Cbf1_Pho4_uniq_mutMax_4660	-0.0824857	1.02275
Probes_Cbf1_Pho4_uniq_mutMax_4471	-0.0824772	0.361013
Probes_Cbf1_Pho4_uniq_mutMax_4214	-0.0818631	0.902402
Probes_Cbf1_Pho4_uniq_mutMax_4708	-0.081813	0.0629138
Probes_Cbf1_Pho4_uniq_mutMax_4455	-0.0816197	0.492046
Probes_Cbf1_Pho4_uniq_mutMax_652	-0.0813274	0.725743
Probes_Cbf1_Pho4_uniq_mutMax_3851	-0.0809134	1.02875
Probes_Cbf1_Pho4_uniq_mutMax_5254	-0.07969	0.541341
Probes_Cbf1_Pho4_uniq_mutMax_1764	-0.0796719	1.66018
Probes_Cbf1_Pho4_uniq_mutMax_1256	-0.0795363	0.542324
Probes_Cbf1_Pho4_uniq_mutMax_2397	-0.0794943	0.157062
Probes_Cbf1_Pho4_uniq_mutMax_2432	-0.0792615	0.600774
Probes_core_supplement_mut_91	-0.0791608	0.801781
Probes_Cbf1_Pho4_uniq_mutMax_2318	-0.0786138	0.313215
Probes_Cbf1_Pho4_uniq_mutMax_5011	-0.0778778	1.00583
Probes_Cbf1_Pho4_uniq_mutMax_240	-0.0775625	0.464708
Probes_Cbf1_Pho4_uniq_mutMax_1013	-0.0768174	0.182322
Probes_Cbf1_Pho4_uniq_mutMax_4789	-0.0768173	0.464114
Probes_Cbf1_Pho4_uniq_mutMax_343	-0.0767065	0.217838
Probes_Cbf1_Pho4_uniq_mutMax_3747	-0.076161	0.0487902
Probes_Cbf1_Pho4_uniq_mutMax_403	-0.0761367	0.219859
Probes_Cbf1_Pho4_uniq_mutMax_2942	-0.0761208	0.756713
Probes_Cbf1_Pho4_uniq_mutMax_5408	-0.0760472	0.565992
Probes_Cbf1_Pho4_uniq_mutMax_3681	-0.0759717	0.435924
Probes_Cbf1_Pho4_uniq_mutMax_1893	-0.0757826	0.0323653
Probes_Cbf1_Pho4_uniq_mutMax_4653	-0.0749321	1.04252
Probes_Cbf1_Pho4_uniq_mutMax_5118	-0.0745001	-0.476619
Probes_Cbf1_Pho4_uniq_mutMax_344	-0.0742178	0.474894
Probes_Cbf1_Pho4_uniq_mutMax_2851	-0.0741296	0.251314
Probes_Cbf1_Pho4_uniq_mutMax_3156	-0.0738778	0.225388
Probes_Cbf1_Pho4_uniq_mutMax_3210	-0.0734283	0.767255
Probes_Cbf1_Pho4_uniq_mutMax_216	-0.0731397	0.154151
Probes_Cbf1_Pho4_uniq_mutMax_1512	-0.0726619	0.554843
Probes_Cbf1_Pho4_uniq_mutMax_4972	-0.07255	1.10587
Probes_Cbf1_Pho4_uniq_mutMax_4566	-0.0718375	0.797191
Probes_Cbf1_Pho4_uniq_mutMax_2488	-0.0717886	-0.0589915
Probes_Cbf1_Pho4_uniq_mutMax_5221	-0.0717373	0.899911
Probes_Cbf1_Pho4_uniq_mutMax_3182	-0.071338	0.22809
Probes_Cbf1_Pho4_uniq_mutMax_5303	-0.0711741	0.543615
Probes_Cbf1_Pho4_uniq_mutMax_5006	-0.0706448	0.262364
Probes_Cbf1_Pho4_uniq_mutMax_483	-0.0702979	0.916291
Probes_Cbf1_Pho4_uniq_mutMax_5115	-0.0700699	1.04345
Probes_Cbf1_Pho4_uniq_mutMax_2593	-0.0698413	-0.654495
Probes_Cbf1_Pho4_uniq_mutMax_2860	-0.0697956	0.475544
Probes_Cbf1_Pho4_uniq_mutMax_535	-0.0696151	1.56977
Probes_Cbf1_Pho4_uniq_mutMax_464	-0.0680182	0.74254
Probes_Cbf1_Pho4_uniq_mutMax_927	-0.0678176	-0.212561
Probes_Cbf1_Pho4_uniq_mutMax_967	-0.0675577	-0.523248
Probes_Cbf1_Pho4_uniq_mutMax_856	-0.0672152	0.388223
Probes_Cbf1_Pho4_uniq_mutMax_3852	-0.0672022	0.953945
Probes_Cbf1_Pho4_uniq_mutMax_3238	-0.0666876	0.693147
Probes_Cbf1_Pho4_uniq_mutMax_49	-0.066129	0.351555
Probes_Cbf1_Pho4_uniq_mutMax_1357	-0.0653192	0.269476
Probes_Cbf1_Pho4_uniq_mutMax_1740	-0.0650265	0.534677
Probes_Cbf1_Pho4_uniq_mutMax_3473	-0.0645088	-0.520534
Probes_Cbf1_Pho4_uniq_mutMax_3091	-0.060735	0.969401
Probes_Cbf1_Pho4_uniq_mutMax_1191	-0.060266	0.82746
Probes_Cbf1_Pho4_uniq_mutMax_1762	-0.0589804	0.0525373
Probes_Cbf1_Pho4_uniq_mutMax_3822	-0.0588602	-0.0114287
Probes_Cbf1_Pho4_uniq_mutMax_4468	-0.05864	0.0343676
Probes_Cbf1_Pho4_uniq_mutMax_2266	-0.0581633	0.869038
Probes_Cbf1_Pho4_uniq_mutMax_2540	-0.0571736	0.767871
Probes_Cbf1_Pho4_uniq_mutMax_1401	-0.0563917	0.574088
Probes_Cbf1_Pho4_uniq_mutMax_4604	-0.0562935	-0.031297
Probes_Cbf1_Pho4_uniq_mutMax_2784	-0.0557531	0.968559
Probes_Cbf1_Pho4_uniq_mutMax_5294	-0.0555567	0.395156
Probes_Cbf1_Pho4_uniq_mutMax_4253	-0.0547527	-0.114113
Probes_Cbf1_Pho4_uniq_mutMax_1452	-0.054451	0.285561
Probes_Cbf1_Pho4_uniq_mutMax_1078	-0.0535144	0.437622
Probes_Cbf1_Pho4_uniq_mutMax_779	-0.053178	0.458109
Probes_Cbf1_Pho4_uniq_mutMax_622	-0.0512401	0.654406
Probes_Cbf1_Pho4_uniq_mutMax_4712	-0.0466662	0.9941
Probes_Cbf1_Pho4_uniq_mutMax_100	-0.0465664	1.01331
Probes_Cbf1_Pho4_uniq_mutMax_2310	-0.0446982	-0.339216
Probes_Cbf1_Pho4_uniq_mutMax_2679	-0.0432594	1.00518
Probes_Cbf1_Pho4_uniq_mutMax_2138	-0.0425983	0.184922
Probes_Cbf1_Pho4_uniq_mutMax_2403	-0.0424648	0.18633
Probes_Cbf1_Pho4_uniq_mutMax_2216	-0.0417248	1.0033
Probes_core_supplement_mut_220	-0.0398922	-0.154151
Probes_Cbf1_Pho4_uniq_mutMax_880	-0.0397381	1.73092
Probes_core_supplement_mut_177	-0.0393512	0.606136
Probes_Cbf1_Pho4_uniq_mutMax_4142	-0.0379315	1.40691
Probes_Cbf1_Pho4_uniq_mutMax_2174	-0.0373954	0.16508
Probes_Cbf1_Pho4_uniq_mutMax_2033	-0.0369813	0.264798
Probes_Cbf1_Pho4_uniq_mutMax_2523	-0.0369725	0.862224
Probes_Cbf1_Pho4_uniq_mutMax_2381	-0.0368531	0.275329
Probes_Cbf1_Pho4_uniq_mutMax_891	-0.0363526	0.412532
Probes_core_supplement_mut_63	-0.0355067	0.131336
Probes_Cbf1_Pho4_uniq_mutMax_4909	-0.0349573	0.317604
Probes_Cbf1_Pho4_uniq_mutMax_5133	-0.0347771	0.901365
Probes_Cbf1_Pho4_uniq_mutMax_4240	-0.0340132	-0.0953102
Probes_Cbf1_Pho4_uniq_mutMax_99	-0.0336369	0.623038
Probes_Cbf1_Pho4_uniq_mutMax_4404	-0.0334655	0.897942
Probes_Cbf1_Pho4_uniq_mutMax_2212	-0.0329183	0.524071
Probes_Cbf1_Pho4_uniq_mutMax_184	-0.0325968	0.0879688
Probes_Cbf1_Pho4_uniq_mutMax_3113	-0.0317155	-0.208848
Probes_core_supplement_mut_137	-0.0308033	0.948039
Probes_Cbf1_Pho4_uniq_mutMax_2990	-0.0289852	0.530893
Probes_Cbf1_Pho4_uniq_mutMax_2907	-0.0288468	1.60181
Probes_Cbf1_Pho4_uniq_mutMax_465	-0.0278607	0.723919
Probes_Cbf1_Pho4_uniq_mutMax_1744	-0.0277967	-0.24222
Probes_Cbf1_Pho4_uniq_mutMax_3414	-0.0275819	0.405465
Probes_Cbf1_Pho4_uniq_mutMax_324	-0.0272654	0.597837
Probes_Cbf1_Pho4_uniq_mutMax_38	-0.0262768	0.572069
Probes_Cbf1_Pho4_uniq_mutMax_3926	-0.025602	0.920449
Probes_Cbf1_Pho4_uniq_mutMax_1031	-0.0230625	0.920283
Probes_Cbf1_Pho4_uniq_mutMax_1540	-0.0223859	0.778669
Probes_Cbf1_Pho4_uniq_mutMax_1780	-0.0213798	0.971457
Probes_Cbf1_Pho4_uniq_mutMax_4369	-0.0206535	1.24432
Probes_Cbf1_Pho4_uniq_mutMax_2924	-0.0178817	0.769133
Probes_Cbf1_Pho4_uniq_mutMax_642	-0.0176361	0.545694
Probes_Cbf1_Pho4_uniq_mutMax_5295	-0.017387	0.274943
Probes_Cbf1_Pho4_uniq_mutMax_4977	-0.0161217	0.695459
Probes_Cbf1_Pho4_uniq_mutMax_3256	-0.015587	1.04902
Probes_Cbf1_Pho4_uniq_mutMax_1525	-0.0147091	0.732888
Probes_Cbf1_Pho4_uniq_mutMax_1711	-0.0126995	1.35166
Probes_Cbf1_Pho4_uniq_mutMax_5360	-0.0123008	0.0296318
Probes_Cbf1_Pho4_uniq_mutMax_653	-0.0109545	0.813984
Probes_Cbf1_Pho4_uniq_mutMax_21	-0.0087252	0.185403
Probes_core_supplement_mut_214	-0.00749583	0.306374
Probes_core_supplement_mut_58	-0.00563816	0.117783
Probes_Cbf1_Pho4_uniq_mutMax_1950	-0.00512326	0.472068
Probes_Cbf1_Pho4_uniq_mutMax_380	-0.00437026	1.67669
Probes_Cbf1_Pho4_uniq_mutMax_1838	-0.00369424	0.890145
Probes_Cbf1_Pho4_uniq_mutMax_3836	-0.000603691	0.14242
Probes_Cbf1_Pho4_uniq_mutMax_127	0.00104263	-0.0638515
Probes_Cbf1_Pho4_uniq_mutMax_5288	0.00261166	0.720546
Probes_Cbf1_Pho4_uniq_mutMax_869	0.00273768	0.924949
Probes_Cbf1_Pho4_uniq_mutMax_5095	0.00335166	0.180262
Probes_Cbf1_Pho4_uniq_mutMax_1585	0.00503002	0.796005
Probes_Cbf1_Pho4_uniq_mutMax_4010	0.00523352	-0.193066
Probes_Cbf1_Pho4_uniq_mutMax_4425	0.0061629	0.459532
Probes_Cbf1_Pho4_uniq_mutMax_512	0.00832453	0.597133
Probes_Cbf1_Pho4_uniq_mutMax_4785	0.00968457	0.470004
Probes_Cbf1_Pho4_uniq_mutMax_2675	0.0100681	0.808204
Probes_Cbf1_Pho4_uniq_mutMax_628	0.010684	0.747854
Probes_Cbf1_Pho4_uniq_mutMax_4730	0.0120638	0.917793
Probes_Cbf1_Pho4_uniq_mutMax_5335	0.013942	0.56453
Probes_Cbf1_Pho4_uniq_mutMax_4820	0.0217773	0.295464
Probes_Cbf1_Pho4_uniq_mutMax_636	0.023979	1.02087
Probes_core_supplement_mut_28	0.0242205	0.405465
Probes_Cbf1_Pho4_uniq_mutMax_3279	0.0268958	-0.215422
Probes_Cbf1_Pho4_uniq_mutMax_3021	0.0270385	0.550046
Probes_Cbf1_Pho4_uniq_mutMax_559	0.0282536	0.676526
Probes_core_supplement_mut_130	0.0284073	0.306374
Probes_Cbf1_Pho4_uniq_mutMax_2995	0.0286079	1.00518
Probes_Cbf1_Pho4_uniq_mutMax_1677	0.0305961	-0.969227
Probes_Cbf1_Pho4_uniq_mutMax_5167	0.0335202	-0.158523
Probes_Cbf1_Pho4_uniq_mutMax_2264	0.0465059	-0.308301
Probes_Cbf1_Pho4_uniq_mutMax_4016	0.0468918	1.02233
Probes_Cbf1_Pho4_uniq_mutMax_1464	0.0507928	0.875469
Probes_Cbf1_Pho4_uniq_mutMax_20	0.0569779	-0.0344862
Probes_Cbf1_Pho4_uniq_mutMax_1655	0.0638324	0.605235
Probes_Cbf1_Pho4_uniq_mutMax_2731	0.071967	1.03967
Probes_Cbf1_Pho4_uniq_mutMax_3246	0.0802736	0.677399
Probes_Cbf1_Pho4_uniq_mutMax_2875	0.0850664	0.932039
Probes_Cbf1_Pho4_uniq_mutMax_1363	0.0914119	0.373716
Probes_Cbf1_Pho4_uniq_mutMax_3958	0.0921381	1.03564
Probes_Cbf1_Pho4_uniq_mutMax_1234	0.116658	0.517853
Probes_Cbf1_Pho4_uniq_mutMax_4565	0.150021	0.519124

## Sheet: B. Full data for Fig3 G, H
Probe_Name	In_Vitro_Resilience	In_Vivo_Resilience
Probes_Cbf1_Pho4_uniq_mutMax_3851	-3.05336	-1.20692
Probes_Cbf1_Pho4_uniq_mutMax_1540	-2.6655	-1.20831
Probes_Cbf1_Pho4_uniq_mutMax_2688	-2.4652	-0.287682
Probes_Cbf1_Pho4_uniq_mutMax_5031	-2.43864	-0.415515
Probes_core_supplement_mut_202	-2.4358	-0.914663
Probes_Cbf1_Pho4_uniq_mutMax_4838	-2.43562	-0.527179
Probes_Cbf1_Pho4_uniq_mutMax_2851	-2.41782	-1.04624
Probes_Cbf1_Pho4_uniq_mutMax_2506	-2.40689	-1.08836
Probes_Cbf1_Pho4_uniq_mutMax_822	-2.40068	0.0236476
Probes_Cbf1_Pho4_uniq_mutMax_3345	-2.39903	-1.32998
Probes_Cbf1_Pho4_uniq_mutMax_1207	-2.3803	-1.46961
Probes_Cbf1_Pho4_uniq_mutMax_1932	-2.35346	-1.19546
Probes_Cbf1_Pho4_uniq_mutMax_5045	-2.33597	-0.721121
Probes_Cbf1_Pho4_uniq_mutMax_2723	-2.32561	-0.876946
Probes_Cbf1_Pho4_uniq_mutMax_1969	-2.32336	-0.210207
Probes_Cbf1_Pho4_uniq_mutMax_2280	-2.30167	-1.46248
Probes_Cbf1_Pho4_uniq_mutMax_2488	-2.2988	-1.29979
Probes_Cbf1_Pho4_uniq_mutMax_4178	-2.27352	-0.346344
Probes_Cbf1_Pho4_uniq_mutMax_4335	-2.26534	-0.939494
Probes_Cbf1_Pho4_uniq_mutMax_2943	-2.26354	-0.317108
Probes_Cbf1_Pho4_uniq_mutMax_2153	-2.24108	-0.263495
Probes_Cbf1_Pho4_uniq_mutMax_1003	-2.236	-0.763257
Probes_Cbf1_Pho4_uniq_mutMax_5340	-2.23102	-0.757367
Probes_Cbf1_Pho4_uniq_mutMax_2964	-2.22202	-0.770605
Probes_Cbf1_Pho4_uniq_mutMax_202	-2.21927	-0.347619
Probes_Cbf1_Pho4_uniq_mutMax_617	-2.21827	-0.791951
Probes_Cbf1_Pho4_uniq_mutMax_4579	-2.2128	-0.698528
Probes_Cbf1_Pho4_uniq_mutMax_4949	-2.20116	-1.25337
Probes_Cbf1_Pho4_uniq_mutMax_530	-2.19143	-0.0169701
Probes_Cbf1_Pho4_uniq_mutMax_1504	-2.18428	-0.714365
Probes_Cbf1_Pho4_uniq_mutMax_3361	-2.1841	-0.496765
Probes_Cbf1_Pho4_uniq_mutMax_5171	-2.18278	-0.771552
Probes_Cbf1_Pho4_uniq_mutMax_5294	-2.18196	-1.37265
Probes_Cbf1_Pho4_uniq_mutMax_744	-2.17267	-0.642546
Probes_Cbf1_Pho4_uniq_mutMax_1901	-2.16642	-0.62198
Probes_Cbf1_Pho4_uniq_mutMax_4565	-2.16171	-0.803909
Probes_Cbf1_Pho4_uniq_mutMax_2990	-2.15419	-1.31869
Probes_Cbf1_Pho4_uniq_mutMax_5025	-2.1495	-1.30355
Probes_Cbf1_Pho4_uniq_mutMax_3926	-2.1454	-0.507045
Probes_Cbf1_Pho4_uniq_mutMax_4142	-2.14519	0.405465
Probes_Cbf1_Pho4_uniq_mutMax_5090	-2.14387	-0.473784
Probes_core_supplement_mut_217	-2.14154	-1.4491
Probes_Cbf1_Pho4_uniq_mutMax_2455	-2.1398	-0.285381
Probes_Cbf1_Pho4_uniq_mutMax_2875	-2.13365	-1.05812
Probes_Cbf1_Pho4_uniq_mutMax_395	-2.12699	-1.29928
Probes_core_supplement_mut_148	-2.12029	-1.97081
Probes_Cbf1_Pho4_uniq_mutMax_3958	-2.11331	-0.646744
Probes_Cbf1_Pho4_uniq_mutMax_2617	-2.11215	-1.30643
Probes_Cbf1_Pho4_uniq_mutMax_1	-2.10571	-0.301475
Probes_Cbf1_Pho4_uniq_mutMax_4604	-2.10251	-0.837561
Probes_Cbf1_Pho4_uniq_mutMax_4820	-2.09992	-0.942471
Probes_Cbf1_Pho4_uniq_mutMax_3805	-2.09798	-0.523646
Probes_Cbf1_Pho4_uniq_mutMax_24	-2.09596	-1.25276
Probes_Cbf1_Pho4_uniq_mutMax_3443	-2.09559	-0.242468
Probes_Cbf1_Pho4_uniq_mutMax_3159	-2.09251	-0.76092
Probes_Cbf1_Pho4_uniq_mutMax_3765	-2.09116	-1.21144
Probes_Cbf1_Pho4_uniq_mutMax_4557	-2.09007	-1.06371
Probes_Cbf1_Pho4_uniq_mutMax_1246	-2.0877	-0.791648
Probes_Cbf1_Pho4_uniq_mutMax_3258	-2.08719	0.326551
Probes_Cbf1_Pho4_uniq_mutMax_546	-2.08616	-0.799528
Probes_Cbf1_Pho4_uniq_mutMax_5267	-2.0859	-0.701966
Probes_core_supplement_mut_93	-2.08121	-1.06604
Probes_Cbf1_Pho4_uniq_mutMax_52	-2.07876	-0.384165
Probes_Cbf1_Pho4_uniq_mutMax_1590	-2.0764	-1.73912
Probes_Cbf1_Pho4_uniq_mutMax_5003	-2.06827	-0.739523
Probes_Cbf1_Pho4_uniq_mutMax_1236	-2.06764	-0.39128
Probes_Cbf1_Pho4_uniq_mutMax_2130	-2.06394	-1.03164
Probes_Cbf1_Pho4_uniq_mutMax_680	-2.06221	-1.41513
Probes_Cbf1_Pho4_uniq_mutMax_2674	-2.05806	-0.511073
Probes_Cbf1_Pho4_uniq_mutMax_201	-2.05474	-0.60873
Probes_Cbf1_Pho4_uniq_mutMax_1191	-2.05166	-1.28246
Probes_Cbf1_Pho4_uniq_mutMax_5379	-2.04762	-1.75554
Probes_Cbf1_Pho4_uniq_mutMax_4684	-2.03744	-1.56709
Probes_Cbf1_Pho4_uniq_mutMax_3909	-2.02716	-1.49821
Probes_Cbf1_Pho4_uniq_mutMax_4852	-2.02581	-0.574431
Probes_Cbf1_Pho4_uniq_mutMax_880	-2.02409	-0.766419
Probes_Cbf1_Pho4_uniq_mutMax_2600	-2.02362	-1.22189
Probes_Cbf1_Pho4_uniq_mutMax_1973	-2.02173	-0.264224
Probes_Cbf1_Pho4_uniq_mutMax_1685	-2.01537	-1.81619
Probes_Cbf1_Pho4_uniq_mutMax_1275	-2.01347	-0.770439
Probes_Cbf1_Pho4_uniq_mutMax_1841	-2.0121	-1.05797
Probes_Cbf1_Pho4_uniq_mutMax_99	-2.01157	-1.03143
Probes_Cbf1_Pho4_uniq_mutMax_5318	-1.99961	-0.809871
Probes_Cbf1_Pho4_uniq_mutMax_1018	-1.99787	-1.62161
Probes_Cbf1_Pho4_uniq_mutMax_2099	-1.98936	-2.05347
Probes_Cbf1_Pho4_uniq_mutMax_1135	-1.98673	-1.11637
Probes_Cbf1_Pho4_uniq_mutMax_1634	-1.97884	-0.658607
Probes_core_supplement_mut_66	-1.96831	-1.21956
Probes_Cbf1_Pho4_uniq_mutMax_336	-1.96822	-0.635083
Probes_core_supplement_mut_131	-1.96731	-2.46891
Probes_Cbf1_Pho4_uniq_mutMax_3212	-1.96399	-0.989494
Probes_Cbf1_Pho4_uniq_mutMax_1537	-1.96367	-1.19896
Probes_Cbf1_Pho4_uniq_mutMax_1677	-1.95602	-1.40082
Probes_core_supplement_mut_68	-1.95276	-1.4018
Probes_Cbf1_Pho4_uniq_mutMax_2803	-1.9508	-0.784808
Probes_core_supplement_mut_20	-1.94256	-1.1421
Probes_Cbf1_Pho4_uniq_mutMax_188	-1.94222	-0.983837
Probes_core_supplement_mut_15	-1.93924	-1.22561
Probes_Cbf1_Pho4_uniq_mutMax_1861	-1.93791	-0.915617
Probes_Cbf1_Pho4_uniq_mutMax_5046	-1.93189	-1.13695
Probes_Cbf1_Pho4_uniq_mutMax_5054	-1.92841	0.0577588
Probes_Cbf1_Pho4_uniq_mutMax_3629	-1.92626	-1.13588
Probes_Cbf1_Pho4_uniq_mutMax_1519	-1.92425	-1.36164
Probes_Cbf1_Pho4_uniq_mutMax_366	-1.92357	-0.693147
Probes_Cbf1_Pho4_uniq_mutMax_2005	-1.92347	-0.988788
Probes_Cbf1_Pho4_uniq_mutMax_4653	-1.91178	-0.757497
Probes_Cbf1_Pho4_uniq_mutMax_4810	-1.90626	-0.885038
Probes_Cbf1_Pho4_uniq_mutMax_3677	-1.90366	-0.693795
Probes_Cbf1_Pho4_uniq_mutMax_4245	-1.89755	-0.312649
Probes_Cbf1_Pho4_uniq_mutMax_1838	-1.89724	-0.0421115
Probes_Cbf1_Pho4_uniq_mutMax_3097	-1.89703	-1.08792
Probes_Cbf1_Pho4_uniq_mutMax_3837	-1.89577	-0.585847
Probes_Cbf1_Pho4_uniq_mutMax_396	-1.8949	-1.16874
Probes_Cbf1_Pho4_uniq_mutMax_3481	-1.89305	-0.898197
Probes_Cbf1_Pho4_uniq_mutMax_5216	-1.89141	-0.766994
Probes_Cbf1_Pho4_uniq_mutMax_978	-1.88868	-0.608481
Probes_Cbf1_Pho4_uniq_mutMax_4495	-1.88505	-0.466971
Probes_core_supplement_mut_165	-1.88475	-1.33702
Probes_Cbf1_Pho4_uniq_mutMax_4206	-1.88439	-1.08736
Probes_Cbf1_Pho4_uniq_mutMax_652	-1.87765	-0.31649
Probes_Cbf1_Pho4_uniq_mutMax_303	-1.87688	-1.8139
Probes_Cbf1_Pho4_uniq_mutMax_3325	-1.87121	-1.01267
Probes_Cbf1_Pho4_uniq_mutMax_3543	-1.86989	0.137041
Probes_Cbf1_Pho4_uniq_mutMax_2033	-1.86072	-0.535738
Probes_Cbf1_Pho4_uniq_mutMax_1762	-1.85378	0.574392
Probes_Cbf1_Pho4_uniq_mutMax_3135	-1.85257	-0.876166
Probes_Cbf1_Pho4_uniq_mutMax_1663	-1.84771	-1.06267
Probes_Cbf1_Pho4_uniq_mutMax_4729	-1.84672	-0.81093
Probes_Cbf1_Pho4_uniq_mutMax_1907	-1.84614	-0.787812
Probes_Cbf1_Pho4_uniq_mutMax_2432	-1.84155	-0.0134834
Probes_Cbf1_Pho4_uniq_mutMax_3256	-1.84068	-0.673577
Probes_Cbf1_Pho4_uniq_mutMax_4094	-1.83908	-0.739834
Probes_Cbf1_Pho4_uniq_mutMax_4601	-1.83425	-0.474094
Probes_core_supplement_mut_277	-1.82348	-0.581922
Probes_Cbf1_Pho4_uniq_mutMax_5424	-1.82333	-0.96459
Probes_Cbf1_Pho4_uniq_mutMax_2731	-1.823	-0.681643
Probes_Cbf1_Pho4_uniq_mutMax_4505	-1.81894	-0.395896
Probes_Cbf1_Pho4_uniq_mutMax_1772	-1.81863	-1.22673
Probes_Cbf1_Pho4_uniq_mutMax_1467	-1.81235	-1.15288
Probes_Cbf1_Pho4_uniq_mutMax_3076	-1.81162	-1.14384
Probes_Cbf1_Pho4_uniq_mutMax_4253	-1.80749	-1.22378
Probes_Cbf1_Pho4_uniq_mutMax_787	-1.80663	-1.42058
Probes_Cbf1_Pho4_uniq_mutMax_5342	-1.80649	-1.6198
Probes_Cbf1_Pho4_uniq_mutMax_3330	-1.80543	-1.12938
Probes_Cbf1_Pho4_uniq_mutMax_5201	-1.80512	-1.25939
Probes_Cbf1_Pho4_uniq_mutMax_4016	-1.80305	-0.0387145
Probes_core_supplement_mut_33	-1.7875	-0.1692
Probes_Cbf1_Pho4_uniq_mutMax_152	-1.78164	-1.15089
Probes_Cbf1_Pho4_uniq_mutMax_5254	-1.78147	-0.812812
Probes_Cbf1_Pho4_uniq_mutMax_1336	-1.77845	-1.1147
Probes_Cbf1_Pho4_uniq_mutMax_5232	-1.77045	-0.510355
Probes_core_supplement_mut_267	-1.76931	-1.03977
Probes_Cbf1_Pho4_uniq_mutMax_768	-1.76806	-1.40269
Probes_Cbf1_Pho4_uniq_mutMax_2076	-1.76594	-0.996143
Probes_Cbf1_Pho4_uniq_mutMax_4954	-1.7641	-0.899942
Probes_Cbf1_Pho4_uniq_mutMax_2668	-1.76286	-0.678796
Probes_Cbf1_Pho4_uniq_mutMax_4220	-1.76127	-1.60095
Probes_Cbf1_Pho4_uniq_mutMax_2387	-1.75747	0.0855383
Probes_Cbf1_Pho4_uniq_mutMax_5115	-1.75396	0.359878
Probes_Cbf1_Pho4_uniq_mutMax_5359	-1.75302	-1.13902
Probes_Cbf1_Pho4_uniq_mutMax_3891	-1.74882	-1.43683
Probes_Cbf1_Pho4_uniq_mutMax_5130	-1.74809	-0.958255
Probes_Cbf1_Pho4_uniq_mutMax_3206	-1.7425	-0.544464
Probes_Cbf1_Pho4_uniq_mutMax_628	-1.72448	-1.45299
Probes_core_supplement_mut_179	-1.72247	-0.86177
Probes_Cbf1_Pho4_uniq_mutMax_967	-1.71708	-0.462624
Probes_Cbf1_Pho4_uniq_mutMax_3552	-1.69894	-1.47555
Probes_Cbf1_Pho4_uniq_mutMax_1530	-1.69593	-1.04422
Probes_Cbf1_Pho4_uniq_mutMax_553	-1.68529	-0.992779
Probes_Cbf1_Pho4_uniq_mutMax_2573	-1.67566	-0.473204
Probes_Cbf1_Pho4_uniq_mutMax_2654	-1.66271	-0.462596
Probes_Cbf1_Pho4_uniq_mutMax_2995	-1.65574	0.356436
Probes_Cbf1_Pho4_uniq_mutMax_4978	-1.65102	-0.432335
Probes_Cbf1_Pho4_uniq_mutMax_5100	-1.64874	-0.203455
Probes_Cbf1_Pho4_uniq_mutMax_4979	-1.64618	-1.17417
Probes_Cbf1_Pho4_uniq_mutMax_644	-1.63439	-1.94591
Probes_Cbf1_Pho4_uniq_mutMax_5091	-1.62916	-0.681451
Probes_Cbf1_Pho4_uniq_mutMax_2023	-1.61619	-1.76766
Probes_Cbf1_Pho4_uniq_mutMax_473	-1.61507	-0.859807
Probes_Cbf1_Pho4_uniq_mutMax_96	-1.61485	-1.04378
Probes_Cbf1_Pho4_uniq_mutMax_1814	-1.61266	-1.05649
Probes_Cbf1_Pho4_uniq_mutMax_1744	-1.61056	-1.07964
Probes_Cbf1_Pho4_uniq_mutMax_5187	-1.61027	-1.22984
Probes_Cbf1_Pho4_uniq_mutMax_480	-1.60775	-1.2646
Probes_Cbf1_Pho4_uniq_mutMax_760	-1.60414	-1.34051
Probes_Cbf1_Pho4_uniq_mutMax_4420	-1.59997	-1.37434
Probes_Cbf1_Pho4_uniq_mutMax_724	-1.59923	0.182322
Probes_Cbf1_Pho4_uniq_mutMax_692	-1.58466	-0.528067
Probes_Cbf1_Pho4_uniq_mutMax_2113	-1.58392	-0.849188
Probes_Cbf1_Pho4_uniq_mutMax_1332	-1.58282	-1.37195
Probes_Cbf1_Pho4_uniq_mutMax_4462	-1.56311	-0.119651
Probes_Cbf1_Pho4_uniq_mutMax_2912	-1.56242	-0.773482
Probes_Cbf1_Pho4_uniq_mutMax_825	-1.55847	-0.500031
Probes_Cbf1_Pho4_uniq_mutMax_913	-1.55456	-0.736543
Probes_Cbf1_Pho4_uniq_mutMax_3852	-1.55334	-1.30505
Probes_Cbf1_Pho4_uniq_mutMax_2909	-1.55081	-0.487183
Probes_Cbf1_Pho4_uniq_mutMax_894	-1.54532	-0.886365
Probes_Cbf1_Pho4_uniq_mutMax_1271	-1.54272	-0.450605
Probes_Cbf1_Pho4_uniq_mutMax_1203	-1.52557	-1.11721
Probes_core_supplement_mut_249	-1.51175	-0.651378
Probes_Cbf1_Pho4_uniq_mutMax_681	-1.51093	-0.684948
Probes_Cbf1_Pho4_uniq_mutMax_294	-1.50202	-0.967668
Probes_Cbf1_Pho4_uniq_mutMax_1095	-1.49898	-0.793104
Probes_Cbf1_Pho4_uniq_mutMax_189	-1.49229	-0.81644
Probes_Cbf1_Pho4_uniq_mutMax_3104	-1.49179	-0.809448
Probes_Cbf1_Pho4_uniq_mutMax_2625	-1.4882	-1.36638
Probes_Cbf1_Pho4_uniq_mutMax_3778	-1.48324	-0.509751
Probes_Cbf1_Pho4_uniq_mutMax_4510	-1.47893	-0.531003
Probes_Cbf1_Pho4_uniq_mutMax_4180	-1.47449	-0.582653
Probes_Cbf1_Pho4_uniq_mutMax_4930	-1.47248	-1.38742
Probes_Cbf1_Pho4_uniq_mutMax_4528	-1.47239	-0.337594
Probes_Cbf1_Pho4_uniq_mutMax_3064	-1.4688	0.119862
Probes_Cbf1_Pho4_uniq_mutMax_3648	-1.4667	-0.456207
Probes_Cbf1_Pho4_uniq_mutMax_32	-1.46319	-0.786979
Probes_Cbf1_Pho4_uniq_mutMax_1904	-1.46086	-1.02299
Probes_Cbf1_Pho4_uniq_mutMax_2683	-1.45302	-1.99243
Probes_Cbf1_Pho4_uniq_mutMax_4742	-1.44223	-1.11114
Probes_Cbf1_Pho4_uniq_mutMax_5290	-1.4417	-0.854306
Probes_Cbf1_Pho4_uniq_mutMax_5390	-1.437	-0.467985
Probes_Cbf1_Pho4_uniq_mutMax_999	-1.42633	-1.15237
Probes_Cbf1_Pho4_uniq_mutMax_719	-1.42325	-0.682218
Probes_Cbf1_Pho4_uniq_mutMax_2437	-1.41948	-1.03639
Probes_Cbf1_Pho4_uniq_mutMax_3939	-1.41589	0.444937
Probes_Cbf1_Pho4_uniq_mutMax_251	-1.41588	-0.784381
Probes_Cbf1_Pho4_uniq_mutMax_3302	-1.41309	-0.984136
Probes_Cbf1_Pho4_uniq_mutMax_4705	-1.40991	-0.741003
Probes_Cbf1_Pho4_uniq_mutMax_5292	-1.40884	-0.685979
Probes_Cbf1_Pho4_uniq_mutMax_781	-1.40722	-0.835956
Probes_Cbf1_Pho4_uniq_mutMax_1019	-1.39865	-1.08705
Probes_Cbf1_Pho4_uniq_mutMax_2040	-1.39823	-0.558981
Probes_Cbf1_Pho4_uniq_mutMax_3534	-1.3957	-0.775772
Probes_Cbf1_Pho4_uniq_mutMax_4755	-1.38819	-0.897133
Probes_Cbf1_Pho4_uniq_mutMax_2958	-1.37921	-1.14866
Probes_Cbf1_Pho4_uniq_mutMax_3696	-1.37915	-0.917255
Probes_Cbf1_Pho4_uniq_mutMax_4474	-1.37669	0.764205
Probes_Cbf1_Pho4_uniq_mutMax_3771	-1.37066	-0.482028
Probes_Cbf1_Pho4_uniq_mutMax_3655	-1.37018	-0.597837
Probes_Cbf1_Pho4_uniq_mutMax_3483	-1.36732	-1.07803
Probes_Cbf1_Pho4_uniq_mutMax_290	-1.36264	-0.785721
Probes_Cbf1_Pho4_uniq_mutMax_75	-1.35363	-1.409
Probes_Cbf1_Pho4_uniq_mutMax_1020	-1.35327	-0.956482
Probes_Cbf1_Pho4_uniq_mutMax_3244	-1.34479	-0.746851
Probes_Cbf1_Pho4_uniq_mutMax_403	-1.33351	-1.28859
Probes_Cbf1_Pho4_uniq_mutMax_4886	-1.33234	-0.863066
Probes_Cbf1_Pho4_uniq_mutMax_3591	-1.32783	-0.920309
Probes_Cbf1_Pho4_uniq_mutMax_2659	-1.32425	-1.03845
Probes_Cbf1_Pho4_uniq_mutMax_4885	-1.32229	-1.33449
Probes_Cbf1_Pho4_uniq_mutMax_2217	-1.32155	-0.705806
Probes_Cbf1_Pho4_uniq_mutMax_2902	-1.32008	-0.580669
Probes_Cbf1_Pho4_uniq_mutMax_5304	-1.31743	-1.21248
Probes_Cbf1_Pho4_uniq_mutMax_323	-1.31548	-0.630476
Probes_Cbf1_Pho4_uniq_mutMax_2806	-1.31426	-0.0367558
Probes_Cbf1_Pho4_uniq_mutMax_1562	-1.31424	-0.594285
Probes_Cbf1_Pho4_uniq_mutMax_4383	-1.31115	-0.437373
Probes_core_supplement_mut_260	-1.30664	-1.43075
Probes_Cbf1_Pho4_uniq_mutMax_3760	-1.30441	-1.18039
Probes_Cbf1_Pho4_uniq_mutMax_2871	-1.30277	-0.216647
Probes_Cbf1_Pho4_uniq_mutMax_2551	-1.29828	-1.93439
Probes_Cbf1_Pho4_uniq_mutMax_3442	-1.2967	-0.655154
Probes_Cbf1_Pho4_uniq_mutMax_2132	-1.29594	-1.50611
Probes_Cbf1_Pho4_uniq_mutMax_4069	-1.29403	-0.67794
Probes_Cbf1_Pho4_uniq_mutMax_3866	-1.29156	-1.5086
Probes_Cbf1_Pho4_uniq_mutMax_4793	-1.28983	-0.478511
Probes_Cbf1_Pho4_uniq_mutMax_989	-1.28817	-0.116018
Probes_Cbf1_Pho4_uniq_mutMax_4840	-1.28698	-0.738215
Probes_core_supplement_mut_156	-1.28604	-1.13783
Probes_Cbf1_Pho4_uniq_mutMax_3354	-1.28526	-0.767688
Probes_Cbf1_Pho4_uniq_mutMax_1051	-1.2841	-0.365716
Probes_Cbf1_Pho4_uniq_mutMax_4334	-1.27674	-0.553976
Probes_Cbf1_Pho4_uniq_mutMax_3497	-1.27249	-1.50705
Probes_Cbf1_Pho4_uniq_mutMax_1894	-1.26779	-1.527
Probes_Cbf1_Pho4_uniq_mutMax_2061	-1.26741	-0.97456
Probes_Cbf1_Pho4_uniq_mutMax_1219	-1.25727	-0.880025
Probes_Cbf1_Pho4_uniq_mutMax_2018	-1.25613	-1.5655
Probes_Cbf1_Pho4_uniq_mutMax_1840	-1.24737	-1.09189
Probes_Cbf1_Pho4_uniq_mutMax_1482	-1.24366	-0.0131038
Probes_Cbf1_Pho4_uniq_mutMax_3078	-1.242	-1.13062
Probes_Cbf1_Pho4_uniq_mutMax_5062	-1.24153	-1.29375
Probes_Cbf1_Pho4_uniq_mutMax_3432	-1.2404	-0.961141
Probes_Cbf1_Pho4_uniq_mutMax_753	-1.24036	-0.938052
Probes_Cbf1_Pho4_uniq_mutMax_2661	-1.24028	0.0529925
Probes_Cbf1_Pho4_uniq_mutMax_4884	-1.23954	-1.05774
Probes_Cbf1_Pho4_uniq_mutMax_1616	-1.23554	-0.729958
Probes_Cbf1_Pho4_uniq_mutMax_2393	-1.23327	-1.11773
Probes_Cbf1_Pho4_uniq_mutMax_4918	-1.23138	0.225162
Probes_Cbf1_Pho4_uniq_mutMax_3936	-1.23081	-0.350483
Probes_Cbf1_Pho4_uniq_mutMax_4952	-1.22782	-1.12218
Probes_Cbf1_Pho4_uniq_mutMax_5188	-1.22446	-1.43392
Probes_Cbf1_Pho4_uniq_mutMax_482	-1.22387	-0.413833
Probes_Cbf1_Pho4_uniq_mutMax_230	-1.22105	-1.15745
Probes_Cbf1_Pho4_uniq_mutMax_1908	-1.21723	-1.07886
Probes_Cbf1_Pho4_uniq_mutMax_3859	-1.21656	-0.0740351
Probes_Cbf1_Pho4_uniq_mutMax_3080	-1.21323	-0.548244
Probes_Cbf1_Pho4_uniq_mutMax_552	-1.21073	-0.914186
Probes_Cbf1_Pho4_uniq_mutMax_1564	-1.2103	0.458721
Probes_Cbf1_Pho4_uniq_mutMax_1190	-1.20464	-0.673378
Probes_Cbf1_Pho4_uniq_mutMax_1737	-1.20257	-0.166266
Probes_Cbf1_Pho4_uniq_mutMax_2133	-1.19899	-1.63627
Probes_Cbf1_Pho4_uniq_mutMax_3207	-1.19821	0.137006
Probes_core_supplement_mut_113	-1.19817	-1.56143
Probes_Cbf1_Pho4_uniq_mutMax_3231	-1.1944	-0.628609
Probes_Cbf1_Pho4_uniq_mutMax_3174	-1.19182	-0.311336
Probes_Cbf1_Pho4_uniq_mutMax_4115	-1.18972	-1.11406
Probes_Cbf1_Pho4_uniq_mutMax_4476	-1.18967	-1.31316
Probes_Cbf1_Pho4_uniq_mutMax_3217	-1.17945	-0.379664
Probes_Cbf1_Pho4_uniq_mutMax_928	-1.17634	0.274002
Probes_Cbf1_Pho4_uniq_mutMax_2755	-1.17618	-0.596213
Probes_Cbf1_Pho4_uniq_mutMax_3236	-1.1741	-1.39834
Probes_Cbf1_Pho4_uniq_mutMax_3004	-1.16717	-1.48023
Probes_Cbf1_Pho4_uniq_mutMax_1306	-1.16354	-1.14268
Probes_Cbf1_Pho4_uniq_mutMax_4327	-1.1545	-1.37681
Probes_Cbf1_Pho4_uniq_mutMax_2878	-1.15268	-0.888089
Probes_Cbf1_Pho4_uniq_mutMax_2606	-1.14743	-1.08374
Probes_Cbf1_Pho4_uniq_mutMax_2496	-1.14535	-0.934983
Probes_Cbf1_Pho4_uniq_mutMax_2813	-1.14502	-0.314763
Probes_Cbf1_Pho4_uniq_mutMax_5127	-1.1337	-1.00313
Probes_Cbf1_Pho4_uniq_mutMax_2287	-1.13277	-0.729609
Probes_Cbf1_Pho4_uniq_mutMax_1472	-1.13182	-0.978116
Probes_Cbf1_Pho4_uniq_mutMax_2185	-1.13018	-0.686049
Probes_Cbf1_Pho4_uniq_mutMax_3043	-1.12772	-0.0821401
Probes_Cbf1_Pho4_uniq_mutMax_2358	-1.12599	-0.122394
Probes_Cbf1_Pho4_uniq_mutMax_5345	-1.12554	-1.1331
Probes_Cbf1_Pho4_uniq_mutMax_2833	-1.12451	-1.05259
Probes_Cbf1_Pho4_uniq_mutMax_4365	-1.12132	-1.19385
Probes_Cbf1_Pho4_uniq_mutMax_2852	-1.12046	-1.35968
Probes_Cbf1_Pho4_uniq_mutMax_2595	-1.11543	-0.861983
Probes_Cbf1_Pho4_uniq_mutMax_2438	-1.11234	-0.932137
Probes_Cbf1_Pho4_uniq_mutMax_987	-1.1084	-1.26501
Probes_Cbf1_Pho4_uniq_mutMax_1548	-1.09924	-0.225215
Probes_Cbf1_Pho4_uniq_mutMax_3477	-1.09582	-1.18191
Probes_Cbf1_Pho4_uniq_mutMax_2903	-1.09553	-0.435543
Probes_Cbf1_Pho4_uniq_mutMax_1727	-1.08722	-0.955854
Probes_Cbf1_Pho4_uniq_mutMax_494	-1.08026	-1.41469
Probes_Cbf1_Pho4_uniq_mutMax_2334	-1.08019	0.128537
Probes_Cbf1_Pho4_uniq_mutMax_2818	-1.07821	-1.1861
Probes_Cbf1_Pho4_uniq_mutMax_5206	-1.07655	-0.0478391
Probes_Cbf1_Pho4_uniq_mutMax_1029	-1.07548	-0.689409
Probes_Cbf1_Pho4_uniq_mutMax_1183	-1.07378	-0.712672
Probes_Cbf1_Pho4_uniq_mutMax_1915	-1.07304	-1.11771
Probes_Cbf1_Pho4_uniq_mutMax_3305	-1.07226	-1.678
Probes_Cbf1_Pho4_uniq_mutMax_4186	-1.06879	-0.891857
Probes_Cbf1_Pho4_uniq_mutMax_2308	-1.06808	-0.84308
Probes_Cbf1_Pho4_uniq_mutMax_1237	-1.06806	-0.301948
Probes_Cbf1_Pho4_uniq_mutMax_736	-1.06667	-0.713957
Probes_Cbf1_Pho4_uniq_mutMax_4234	-1.0646	-0.981916
Probes_Cbf1_Pho4_uniq_mutMax_1432	-1.0568	0.113899
Probes_Cbf1_Pho4_uniq_mutMax_1790	-1.05659	-1.2062
Probes_Cbf1_Pho4_uniq_mutMax_5123	-1.04644	-1.37912
Probes_Cbf1_Pho4_uniq_mutMax_1507	-1.04546	-1.00363
Probes_Cbf1_Pho4_uniq_mutMax_4571	-1.04346	-0.61963
Probes_Cbf1_Pho4_uniq_mutMax_4805	-1.04152	-0.398774
Probes_Cbf1_Pho4_uniq_mutMax_3063	-1.03921	0.129371
Probes_Cbf1_Pho4_uniq_mutMax_2794	-1.03637	-0.276045
Probes_Cbf1_Pho4_uniq_mutMax_1376	-1.03213	-1.12267
Probes_Cbf1_Pho4_uniq_mutMax_2247	-1.03135	-0.600839
Probes_Cbf1_Pho4_uniq_mutMax_2002	-1.03028	-1.09159
Probes_Cbf1_Pho4_uniq_mutMax_2297	-1.02894	-1.44734
Probes_Cbf1_Pho4_uniq_mutMax_3985	-1.0285	-0.919057
Probes_Cbf1_Pho4_uniq_mutMax_5256	-1.02609	-0.723919
Probes_Cbf1_Pho4_uniq_mutMax_1678	-1.02564	-1.43179
Probes_Cbf1_Pho4_uniq_mutMax_2202	-1.02415	-1.11393
Probes_Cbf1_Pho4_uniq_mutMax_2451	-1.01923	-0.268444
Probes_Cbf1_Pho4_uniq_mutMax_3381	-1.01914	-0.602418
Probes_Cbf1_Pho4_uniq_mutMax_4906	-1.01148	-0.31193
Probes_Cbf1_Pho4_uniq_mutMax_4040	-1.00876	-1.20218
Probes_core_supplement_mut_245	-1.00619	-1.22223
Probes_Cbf1_Pho4_uniq_mutMax_2003	-0.995979	-1.04906
Probes_Cbf1_Pho4_uniq_mutMax_2179	-0.993069	-1.31088
Probes_Cbf1_Pho4_uniq_mutMax_2285	-0.991472	-0.904893
Probes_Cbf1_Pho4_uniq_mutMax_866	-0.979904	-0.838885
Probes_Cbf1_Pho4_uniq_mutMax_5036	-0.97904	-0.801078
Probes_Cbf1_Pho4_uniq_mutMax_4084	-0.974604	-0.00300752
Probes_Cbf1_Pho4_uniq_mutMax_4627	-0.974134	-1.45529
Probes_Cbf1_Pho4_uniq_mutMax_1232	-0.970074	-0.433718
Probes_Cbf1_Pho4_uniq_mutMax_3446	-0.968388	-1.03525
Probes_Cbf1_Pho4_uniq_mutMax_5422	-0.968192	-0.389729
Probes_Cbf1_Pho4_uniq_mutMax_2834	-0.965873	-1.12535
Probes_Cbf1_Pho4_uniq_mutMax_1033	-0.961646	-0.0170297
Probes_Cbf1_Pho4_uniq_mutMax_2259	-0.961357	-1.45864
Probes_Cbf1_Pho4_uniq_mutMax_4148	-0.960453	0.309823
Probes_Cbf1_Pho4_uniq_mutMax_1494	-0.95385	-0.91915
Probes_Cbf1_Pho4_uniq_mutMax_1883	-0.951907	-0.697642
Probes_Cbf1_Pho4_uniq_mutMax_3010	-0.949644	-0.726247
Probes_Cbf1_Pho4_uniq_mutMax_4556	-0.946287	-1.06905
Probes_Cbf1_Pho4_uniq_mutMax_2724	-0.941272	-0.31055
Probes_Cbf1_Pho4_uniq_mutMax_4815	-0.931189	-0.692449
Probes_Cbf1_Pho4_uniq_mutMax_5164	-0.918843	-0.751798
Probes_Cbf1_Pho4_uniq_mutMax_5019	-0.906041	-0.345451
Probes_Cbf1_Pho4_uniq_mutMax_238	-0.904826	-1.26397
Probes_Cbf1_Pho4_uniq_mutMax_979	-0.890511	-0.615314
Probes_Cbf1_Pho4_uniq_mutMax_1323	-0.885795	-0.102639
Probes_Cbf1_Pho4_uniq_mutMax_5002	-0.880663	-0.661473
Probes_Cbf1_Pho4_uniq_mutMax_2864	-0.873393	-1.46481
Probes_Cbf1_Pho4_uniq_mutMax_493	-0.86453	-1.42806
Probes_Cbf1_Pho4_uniq_mutMax_4447	-0.859721	-1.27714
Probes_Cbf1_Pho4_uniq_mutMax_4541	-0.854855	-1.5008
Probes_Cbf1_Pho4_uniq_mutMax_3173	-0.85389	-0.778131
Probes_core_supplement_mut_82	-0.853046	-0.887891
Probes_Cbf1_Pho4_uniq_mutMax_4509	-0.845736	-0.950598
Probes_core_supplement_mut_250	-0.842891	-0.880088
Probes_Cbf1_Pho4_uniq_mutMax_1291	-0.838667	-0.649457
Probes_Cbf1_Pho4_uniq_mutMax_4432	-0.836807	-1.58224
Probes_Cbf1_Pho4_uniq_mutMax_3385	-0.835383	-0.942766
Probes_Cbf1_Pho4_uniq_mutMax_1610	-0.834764	-1.51282
Probes_Cbf1_Pho4_uniq_mutMax_2807	-0.83204	-0.560758
Probes_Cbf1_Pho4_uniq_mutMax_4340	-0.812077	-0.98171
Probes_Cbf1_Pho4_uniq_mutMax_3950	-0.804125	-1.02292
Probes_Cbf1_Pho4_uniq_mutMax_134	-0.802322	-0.751724
Probes_Cbf1_Pho4_uniq_mutMax_2512	-0.797312	-1.18744
Probes_Cbf1_Pho4_uniq_mutMax_124	-0.790903	-1.40738
Probes_Cbf1_Pho4_uniq_mutMax_2670	-0.790577	-0.970836
Probes_Cbf1_Pho4_uniq_mutMax_12	-0.785443	-0.344115
Probes_Cbf1_Pho4_uniq_mutMax_1099	-0.785138	-0.620352
Probes_Cbf1_Pho4_uniq_mutMax_1960	-0.777742	-0.0207847
Probes_Cbf1_Pho4_uniq_mutMax_3831	-0.775705	-1.07044
Probes_Cbf1_Pho4_uniq_mutMax_909	-0.775203	-0.736364
Probes_Cbf1_Pho4_uniq_mutMax_2158	-0.774956	-0.312728
Probes_Cbf1_Pho4_uniq_mutMax_383	-0.771882	-0.0953102
Probes_Cbf1_Pho4_uniq_mutMax_775	-0.763396	-0.238549
Probes_Cbf1_Pho4_uniq_mutMax_2434	-0.760181	-0.57688
Probes_Cbf1_Pho4_uniq_mutMax_78	-0.753455	-0.467455
Probes_Cbf1_Pho4_uniq_mutMax_4645	-0.74974	-0.2012
Probes_Cbf1_Pho4_uniq_mutMax_3864	-0.747807	-0.667455
Probes_Cbf1_Pho4_uniq_mutMax_1635	-0.739791	-1.33003
Probes_Cbf1_Pho4_uniq_mutMax_1717	-0.714922	-1.01153
Probes_Cbf1_Pho4_uniq_mutMax_5104	-0.709554	-0.816915
Probes_Cbf1_Pho4_uniq_mutMax_812	-0.708995	0.545822
Probes_Cbf1_Pho4_uniq_mutMax_5059	-0.707145	-1.38243
Probes_Cbf1_Pho4_uniq_mutMax_2593	-0.696157	-1.00036
Probes_Cbf1_Pho4_uniq_mutMax_2656	-0.687672	-0.0425596
Probes_Cbf1_Pho4_uniq_mutMax_2552	-0.679771	-1.30801
Probes_Cbf1_Pho4_uniq_mutMax_3178	-0.671368	-1.22071
Probes_Cbf1_Pho4_uniq_mutMax_4294	-0.667074	-0.555239
Probes_Cbf1_Pho4_uniq_mutMax_1391	-0.664635	-0.440521
Probes_Cbf1_Pho4_uniq_mutMax_5380	-0.661692	-0.171873
Probes_Cbf1_Pho4_uniq_mutMax_3499	-0.647566	-1.45939
Probes_Cbf1_Pho4_uniq_mutMax_1107	-0.643036	0.616472
Probes_Cbf1_Pho4_uniq_mutMax_983	-0.640914	-0.606051
Probes_Cbf1_Pho4_uniq_mutMax_3611	-0.632642	-1.116
Probes_Cbf1_Pho4_uniq_mutMax_1444	-0.630139	-0.0383426
Probes_Cbf1_Pho4_uniq_mutMax_4632	-0.62065	-0.666693
Probes_Cbf1_Pho4_uniq_mutMax_3745	-0.608393	-1.2648
Probes_Cbf1_Pho4_uniq_mutMax_1774	-0.606886	-0.735021
Probes_Cbf1_Pho4_uniq_mutMax_2030	-0.598893	-0.579026
Probes_Cbf1_Pho4_uniq_mutMax_4614	-0.597374	-1.14788
Probes_Cbf1_Pho4_uniq_mutMax_84	-0.597016	-0.748762
Probes_Cbf1_Pho4_uniq_mutMax_1945	-0.592732	-0.427959
Probes_Cbf1_Pho4_uniq_mutMax_4787	-0.590761	-1.12938
Probes_Cbf1_Pho4_uniq_mutMax_1243	-0.585447	-0.715824
Probes_Cbf1_Pho4_uniq_mutMax_2802	-0.584969	-1.16604
Probes_Cbf1_Pho4_uniq_mutMax_1529	-0.584202	-1.01995
Probes_Cbf1_Pho4_uniq_mutMax_3107	-0.572268	-0.73245
Probes_Cbf1_Pho4_uniq_mutMax_4925	-0.56627	-0.951805
Probes_Cbf1_Pho4_uniq_mutMax_205	-0.562016	-1.23866
Probes_Cbf1_Pho4_uniq_mutMax_4706	-0.557149	-0.624527
Probes_Cbf1_Pho4_uniq_mutMax_3362	-0.556337	0.239104
Probes_Cbf1_Pho4_uniq_mutMax_4119	-0.554394	-0.438041
Probes_Cbf1_Pho4_uniq_mutMax_1412	-0.55393	-0.411676
Probes_Cbf1_Pho4_uniq_mutMax_4223	-0.53813	-0.696897
Probes_Cbf1_Pho4_uniq_mutMax_4661	-0.537174	-0.564926
Probes_Cbf1_Pho4_uniq_mutMax_385	-0.52918	-1.20397
Probes_Cbf1_Pho4_uniq_mutMax_2359	-0.520386	-1.0471
Probes_Cbf1_Pho4_uniq_mutMax_3213	-0.513376	-0.467585
Probes_Cbf1_Pho4_uniq_mutMax_4478	-0.510935	-1.17543
Probes_Cbf1_Pho4_uniq_mutMax_3001	-0.508369	-0.895671
Probes_Cbf1_Pho4_uniq_mutMax_5088	-0.488022	-1.15433
Probes_Cbf1_Pho4_uniq_mutMax_4093	-0.484905	-1.47085
Probes_Cbf1_Pho4_uniq_mutMax_4281	-0.462431	-0.895068
Probes_Cbf1_Pho4_uniq_mutMax_567	-0.460136	-0.517606
Probes_Cbf1_Pho4_uniq_mutMax_1816	-0.457037	-0.769167
Probes_Cbf1_Pho4_uniq_mutMax_916	-0.456698	-1.73957
Probes_Cbf1_Pho4_uniq_mutMax_4333	-0.449966	-0.561986
Probes_Cbf1_Pho4_uniq_mutMax_176	-0.449032	-0.35364
Probes_Cbf1_Pho4_uniq_mutMax_963	-0.447105	0.0142334
Probes_Cbf1_Pho4_uniq_mutMax_4590	-0.432553	-0.914378
Probes_Cbf1_Pho4_uniq_mutMax_1811	-0.428851	0.596722
Probes_Cbf1_Pho4_uniq_mutMax_3383	-0.410698	-0.439017
Probes_Cbf1_Pho4_uniq_mutMax_367	-0.409145	-1.03647
Probes_Cbf1_Pho4_uniq_mutMax_1946	-0.404733	-0.642311
Probes_Cbf1_Pho4_uniq_mutMax_5131	-0.401448	0.33531
Probes_Cbf1_Pho4_uniq_mutMax_2025	-0.400018	-0.664101
Probes_Cbf1_Pho4_uniq_mutMax_3670	-0.397317	-0.51015
Probes_Cbf1_Pho4_uniq_mutMax_4512	-0.393727	-0.127033
Probes_Cbf1_Pho4_uniq_mutMax_3914	-0.390866	-1.08846
Probes_Cbf1_Pho4_uniq_mutMax_4958	-0.387319	-0.933856
Probes_Cbf1_Pho4_uniq_mutMax_1807	-0.382037	-0.728446
Probes_Cbf1_Pho4_uniq_mutMax_4325	-0.377799	-0.32561
Probes_Cbf1_Pho4_uniq_mutMax_833	-0.377646	-0.960695
Probes_Cbf1_Pho4_uniq_mutMax_5420	-0.377369	-0.943262
Probes_Cbf1_Pho4_uniq_mutMax_1213	-0.37526	-1.14831
Probes_Cbf1_Pho4_uniq_mutMax_2824	-0.362396	-0.411535
Probes_Cbf1_Pho4_uniq_mutMax_1022	-0.354712	-0.727549
Probes_Cbf1_Pho4_uniq_mutMax_2839	-0.354043	-0.54773
Probes_Cbf1_Pho4_uniq_mutMax_5044	-0.340246	-0.806428
Probes_Cbf1_Pho4_uniq_mutMax_3309	-0.330134	-1.15167
Probes_Cbf1_Pho4_uniq_mutMax_565	-0.330112	-1.15937
Probes_Cbf1_Pho4_uniq_mutMax_1959	-0.329283	-0.0623759
Probes_Cbf1_Pho4_uniq_mutMax_5067	-0.327426	0.536867
Probes_Cbf1_Pho4_uniq_mutMax_515	-0.326976	0.297983
Probes_Cbf1_Pho4_uniq_mutMax_1417	-0.325403	0.700318
Probes_Cbf1_Pho4_uniq_mutMax_1571	-0.324124	-1.09861
Probes_Cbf1_Pho4_uniq_mutMax_3368	-0.312679	0.0687293
Probes_Cbf1_Pho4_uniq_mutMax_4345	-0.311662	-0.792374
Probes_Cbf1_Pho4_uniq_mutMax_3694	-0.311654	-0.695855
Probes_Cbf1_Pho4_uniq_mutMax_1348	-0.311582	-1.03609
Probes_Cbf1_Pho4_uniq_mutMax_4100	-0.305724	-0.9643
Probes_Cbf1_Pho4_uniq_mutMax_511	-0.29721	-0.507105
Probes_Cbf1_Pho4_uniq_mutMax_3695	-0.293191	-0.893441
Probes_Cbf1_Pho4_uniq_mutMax_3806	-0.292722	-1.32377
Probes_Cbf1_Pho4_uniq_mutMax_4693	-0.292427	-1.5437
Probes_Cbf1_Pho4_uniq_mutMax_1311	-0.288875	-0.813236
Probes_Cbf1_Pho4_uniq_mutMax_2961	-0.287712	-1.14022
Probes_Cbf1_Pho4_uniq_mutMax_2698	-0.280296	0.317689
Probes_Cbf1_Pho4_uniq_mutMax_1231	-0.2793	-0.340985
Probes_Cbf1_Pho4_uniq_mutMax_4292	-0.278572	-0.152048
Probes_Cbf1_Pho4_uniq_mutMax_2121	-0.276992	-0.135438
Probes_Cbf1_Pho4_uniq_mutMax_3303	-0.271276	-0.985463
Probes_Cbf1_Pho4_uniq_mutMax_5419	-0.270984	-0.57256
Probes_Cbf1_Pho4_uniq_mutMax_1024	-0.26601	-1.32981
Probes_Cbf1_Pho4_uniq_mutMax_844	-0.260047	-0.45404
Probes_Cbf1_Pho4_uniq_mutMax_1796	-0.257037	-1.19296
Probes_Cbf1_Pho4_uniq_mutMax_5018	-0.243477	-1.12215
Probes_Cbf1_Pho4_uniq_mutMax_898	-0.240199	-1.17532
Probes_Cbf1_Pho4_uniq_mutMax_714	-0.231675	-0.865824
Probes_Cbf1_Pho4_uniq_mutMax_1409	-0.229804	-0.773113
Probes_Cbf1_Pho4_uniq_mutMax_139	-0.228492	-0.90712
Probes_Cbf1_Pho4_uniq_mutMax_4558	-0.224325	-0.840053
Probes_Cbf1_Pho4_uniq_mutMax_3311	-0.223819	0.0289875
Probes_Cbf1_Pho4_uniq_mutMax_3684	-0.223054	-1.34212
Probes_Cbf1_Pho4_uniq_mutMax_3304	-0.221307	-0.907034
Probes_Cbf1_Pho4_uniq_mutMax_5210	-0.215752	-0.819996
Probes_Cbf1_Pho4_uniq_mutMax_5165	-0.208675	-0.414659
Probes_Cbf1_Pho4_uniq_mutMax_2406	-0.20759	-0.693147
Probes_Cbf1_Pho4_uniq_mutMax_742	-0.19644	-0.663365
Probes_Cbf1_Pho4_uniq_mutMax_1645	-0.193569	-0.340949
Probes_Cbf1_Pho4_uniq_mutMax_3955	-0.19009	0.815536
Probes_Cbf1_Pho4_uniq_mutMax_1308	-0.186325	-1.05931
Probes_Cbf1_Pho4_uniq_mutMax_3643	-0.185003	-0.853748
Probes_Cbf1_Pho4_uniq_mutMax_2128	-0.184612	-1.33194
Probes_Cbf1_Pho4_uniq_mutMax_310	-0.180542	-0.773626
Probes_Cbf1_Pho4_uniq_mutMax_421	-0.178416	-0.525173
Probes_Cbf1_Pho4_uniq_mutMax_4316	-0.177973	-0.637442
Probes_Cbf1_Pho4_uniq_mutMax_1411	-0.177752	0.324321
Probes_Cbf1_Pho4_uniq_mutMax_686	-0.174444	-0.010987
Probes_Cbf1_Pho4_uniq_mutMax_3176	-0.172722	-1.48041
Probes_Cbf1_Pho4_uniq_mutMax_4151	-0.163805	-1.57819
Probes_Cbf1_Pho4_uniq_mutMax_4794	-0.158015	-0.632289
Probes_Cbf1_Pho4_uniq_mutMax_3438	-0.153852	-0.976763
Probes_Cbf1_Pho4_uniq_mutMax_3068	-0.153462	-0.665012
Probes_Cbf1_Pho4_uniq_mutMax_4905	-0.153109	-0.939185
Probes_Cbf1_Pho4_uniq_mutMax_2677	-0.152174	-1.08241
Probes_Cbf1_Pho4_uniq_mutMax_675	-0.14273	-0.507248
Probes_Cbf1_Pho4_uniq_mutMax_3878	-0.127506	-1.27337
Probes_Cbf1_Pho4_uniq_mutMax_4275	-0.125162	-1.3238
Probes_Cbf1_Pho4_uniq_mutMax_1742	-0.122595	-0.131035
Probes_Cbf1_Pho4_uniq_mutMax_1392	-0.119916	-0.574123
Probes_Cbf1_Pho4_uniq_mutMax_2660	-0.118838	-0.671029
Probes_Cbf1_Pho4_uniq_mutMax_2846	-0.118086	-0.938982
Probes_Cbf1_Pho4_uniq_mutMax_5330	-0.116887	-0.180541
Probes_Cbf1_Pho4_uniq_mutMax_1009	-0.111346	-0.96938
Probes_Cbf1_Pho4_uniq_mutMax_3711	-0.104574	-0.418623
Probes_Cbf1_Pho4_uniq_mutMax_3314	-0.100578	-0.608572
Probes_Cbf1_Pho4_uniq_mutMax_3899	-0.0944021	-1.37699
Probes_Cbf1_Pho4_uniq_mutMax_3439	-0.0927221	-1.69948
Probes_Cbf1_Pho4_uniq_mutMax_1535	-0.0872094	-1.28131
Probes_Cbf1_Pho4_uniq_mutMax_814	-0.0855721	-0.520905
Probes_Cbf1_Pho4_uniq_mutMax_1837	-0.085451	-1.74223
Probes_Cbf1_Pho4_uniq_mutMax_4146	-0.082411	-1.89712
Probes_Cbf1_Pho4_uniq_mutMax_2450	-0.0695295	-0.493065
Probes_Cbf1_Pho4_uniq_mutMax_4778	-0.0687753	0.410672
Probes_Cbf1_Pho4_uniq_mutMax_2776	-0.0642183	-0.497948
Probes_Cbf1_Pho4_uniq_mutMax_63	-0.0631218	-0.54057
Probes_Cbf1_Pho4_uniq_mutMax_850	-0.0517888	0.220398
Probes_Cbf1_Pho4_uniq_mutMax_93	-0.050512	-0.837248
Probes_Cbf1_Pho4_uniq_mutMax_4280	-0.0481695	0.420949
Probes_Cbf1_Pho4_uniq_mutMax_2066	-0.0465187	0.102745
Probes_Cbf1_Pho4_uniq_mutMax_1521	-0.0417467	-0.105294
Probes_Cbf1_Pho4_uniq_mutMax_981	-0.0268308	-0.649918
Probes_Cbf1_Pho4_uniq_mutMax_3308	-0.00542995	-1.10137
Probes_Cbf1_Pho4_uniq_mutMax_1491	0.00524795	-0.518766
Probes_Cbf1_Pho4_uniq_mutMax_3965	0.0141767	-1.25496
Probes_Cbf1_Pho4_uniq_mutMax_4777	0.0246847	-0.754972
Probes_Cbf1_Pho4_uniq_mutMax_3605	0.0509561	-0.376309
Probes_Cbf1_Pho4_uniq_mutMax_513	0.051727	-0.317618
Probes_Cbf1_Pho4_uniq_mutMax_3049	0.0726049	-0.625396
Probes_Cbf1_Pho4_uniq_mutMax_3020	0.0743081	-1.13735
Probes_Cbf1_Pho4_uniq_mutMax_1746	0.0773059	-0.532281
Probes_Cbf1_Pho4_uniq_mutMax_4736	0.077649	-1.19059
Probes_Cbf1_Pho4_uniq_mutMax_3495	0.0831695	-1.13011
Probes_Cbf1_Pho4_uniq_mutMax_5094	0.0878674	-0.314963
Probes_Cbf1_Pho4_uniq_mutMax_3551	0.088192	-1.48828
Probes_Cbf1_Pho4_uniq_mutMax_3124	0.0940474	-0.265919
Probes_Cbf1_Pho4_uniq_mutMax_3923	0.0979919	-1.21386
Probes_Cbf1_Pho4_uniq_mutMax_1933	0.102486	-0.218453
Probes_Cbf1_Pho4_uniq_mutMax_3856	0.111375	-0.0615758
Probes_Cbf1_Pho4_uniq_mutMax_2338	0.111997	-0.284761
Probes_Cbf1_Pho4_uniq_mutMax_2640	0.114879	-0.304353
Probes_Cbf1_Pho4_uniq_mutMax_1815	0.123492	-1.07573
Probes_Cbf1_Pho4_uniq_mutMax_1789	0.130781	-1.16147
Probes_Cbf1_Pho4_uniq_mutMax_3555	0.138797	-1.01064
Probes_Cbf1_Pho4_uniq_mutMax_2191	0.152592	-0.335904
Probes_Cbf1_Pho4_uniq_mutMax_4122	0.155981	0.868351
Probes_Cbf1_Pho4_uniq_mutMax_2560	0.16408	0.341508
Probes_Cbf1_Pho4_uniq_mutMax_3445	0.165334	-1.06779
Probes_Cbf1_Pho4_uniq_mutMax_1836	0.16559	-1.96431
Probes_Cbf1_Pho4_uniq_mutMax_3398	0.166675	-1.05487
Probes_Cbf1_Pho4_uniq_mutMax_1241	0.17195	-1.12312
Probes_Cbf1_Pho4_uniq_mutMax_711	0.186858	-0.618202
Probes_Cbf1_Pho4_uniq_mutMax_1767	0.190755	-0.0299214
Probes_Cbf1_Pho4_uniq_mutMax_2052	0.207929	-1.05871
Probes_Cbf1_Pho4_uniq_mutMax_4477	0.234302	-1.17369
Probes_Cbf1_Pho4_uniq_mutMax_3737	0.2386	-0.448762
Probes_Cbf1_Pho4_uniq_mutMax_1957	0.241851	-0.802106
Probes_Cbf1_Pho4_uniq_mutMax_1988	0.246567	-1.29395
Probes_Cbf1_Pho4_uniq_mutMax_1691	0.247572	-0.622401
Probes_Cbf1_Pho4_uniq_mutMax_598	0.250825	-0.046847
Probes_Cbf1_Pho4_uniq_mutMax_1394	0.262887	0.177038
Probes_Cbf1_Pho4_uniq_mutMax_305	0.278361	-1.12282
Probes_Cbf1_Pho4_uniq_mutMax_2791	0.295788	0.169513
Probes_Cbf1_Pho4_uniq_mutMax_3066	0.321862	0.559186
Probes_Cbf1_Pho4_uniq_mutMax_2960	0.32641	-1.10869
Probes_Cbf1_Pho4_uniq_mutMax_2631	0.330685	-0.280623
