# Supplementary material for: Competition for DNA binding between paralogous transcription factors determines their genomic occupancy and regulatory functions
Source: HighWire-hosted journal article supplement (doi:10.1101/gr.275145.120), 2021-05-11
Supplement: Supplemental_Table_S4.xlsx [file Supplemental_Table_S4.xlsx]

## Sheet: README
Supplemental Table S4. Gene expression analyses. (A) Gene lists analyzed in Fig. 4 and Supplemental Fig. S5A-D. Blue: the 18 Pho4 targets in physiological conditions. Red: the 10 genes that are Pho4 targets only in cbf1∆. (B) Yeast and human TF paralogs co-expressed at different percentile cutoffs. (C) Co-expression of TFs from the MITF and MLX orthologous groups. (D) Co-expression of human TF pa…

## Sheet: A. Data for Fig.4
Gene_Name	Probe_Name	Pho4_PBM	Pho4_competition_PBM	Pho4_ChIP_dPHO80dCbf1	Pho4_ChIP_dPHO80	resilience	Cbf1_PBM	nucleosomeXpbm	nucleosome
PHO8	Probes_Cbf1_Pho4_uniq_mutMax_1271	22091.4	15636.7	689	1456	0.912579	828.605	1.91974e+07	443
PHO81	Probes_Cbf1_Pho4_uniq_mutMax_2455	18599.4	15338.1	756	829	0.881234	1178.67	2.26541e+07	94
PHO86	Probes_Cbf1_Pho4_uniq_mutMax_2851	26646.8	17111.5	609	783	0.928551	979.984	3.42145e+07	28
PHO5	Probes_Cbf1_Pho4_uniq_mutMax_379	18766.4	15051.9	250	1097	0.841348	225.362	1.38121e+07	576
PHO11	Probes_Cbf1_Pho4_uniq_mutMax_144	24703	12456.9	0	0	0.752517	509.349	3.24103e+07	0
PHO89	Probes_Cbf1_Pho4_uniq_mutMax_535	21120.2	16910.4	468	2249	0.932753	1089.8	2.27676e+07	234
PHM6	Probes_Cbf1_Pho4_uniq_mutMax_1122	23808	14801.8	563	1651	0.812798	260.564	2.73554e+07	163
VTC1	Probes_Cbf1_Pho4_uniq_mutMax_1762	23383.2	16435.8	482	508	0.942725	1027.97	2.97201e+07	41
ENA2	Probes_Cbf1_Pho4_uniq_mutMax_957	13075	12037.5	0	0	0.806744	435.849	1.71543e+07	0
VTC2	Probes_Cbf1_Pho4_uniq_mutMax_1969	25873.2	16576.7	656	1153	0.775156	1322.9	2.89521e+07	193
ENA1	Probes_Cbf1_Pho4_uniq_mutMax_961	17950.2	14642.8	379	1760	0.80882	280.627	1.72502e+07	351
GDE1	Probes_Cbf1_Pho4_uniq_mutMax_5160	19651.5	13523.9	64	290	0.863721	219.061	1.91405e+07	338
PHM8	Probes_Cbf1_Pho4_uniq_mutMax_1711	14579.2	14114.9	213	823	0.987381	129.814	NA	NA
VIP1	Probes_Cbf1_Pho4_uniq_mutMax_3797	20157.4	15852.9	74	95	0.828704	4596.47	2.64061e+07	2
DDP1	Probes_Cbf1_Pho4_uniq_mutMax_4838	27266.4	17233	448	432	0.859808	1346.59	2.70755e+07	319
YJL119C	Probes_Cbf1_Pho4_uniq_mutMax_4342	13242.7	13159.5	221	285	0.881267	113.948	NA	NA
HOR2	Probes_Cbf1_Pho4_uniq_mutMax_1744	15365.7	13954.3	172	135	0.972586	2510.91	1.9115e+07	68
YNL217W	Probes_Cbf1_Pho4_uniq_mutMax_4342	13242.7	13159.5	221	285	0.881267	113.948	NA	NA
SUL2	Probes_Cbf1_Pho4_uniq_mutMax_3497	20809.8	11288.4	317	114	0.659148	4886.28	2.32654e+07	194
SER33	Probes_Cbf1_Pho4_uniq_mutMax_1444	13179.8	8872.78	311	117	0.53879	6916.96	1.6567e+07	55
RMD6	Probes_Cbf1_Pho4_uniq_mutMax_1564	19298.8	11377.9	237	125	0.660299	3581.7	2.45095e+07	42
YDR061W	Probes_Cbf1_Pho4_uniq_mutMax_983	16652.5	8160.65	107	85	0.534792	9067.94	2.00662e+07	107
GSH1	Probes_Cbf1_Pho4_uniq_mutMax_2864	28872.4	11274.2	504	189	0.657333	5602.04	3.25103e+07	186
YAL018C	Probes_Cbf1_Pho4_uniq_mutMax_78	25050.7	9350.14	157	43	0.599385	14663	3.27914e+07	3
YHR033W	Probes_Cbf1_Pho4_uniq_mutMax_2600	27652.5	12892.8	652	433	0.885096	569.651	1.84995e+07	643
SAM2	Probes_Cbf1_Pho4_uniq_mutMax_1291	25175.7	10183.5	428	154	0.615743	10439.5	3.04625e+07	102
GFD1	Probes_Cbf1_Pho4_uniq_mutMax_4180	16717.3	13279.7	311	155	0.757634	3229.03	1.96596e+07	136
QCR10	Probes_Cbf1_Pho4_uniq_mutMax_2560	20341.9	6808.88	51	76	0.521799	11531.5	NA	NA

## Sheet: B. Data for Fig.S5E
Yeast				Human
Percentile cutoff (%)	Number of TF families	Percent of all TF families (excluding zinc finger families)		Percentile cutoff (%)	Number of TF families	Percent of all TF families (excluding zinc finger families)
0	16	100		0	45	100
5	16	100		1	45	100
10	14	87.5		2	45	100
15	14	87.5		3	45	100
20	14	87.5		4	45	100
25	14	87.5		5	45	100
30	13	81.25		6	45	100
35	13	81.25		7	45	100
40	13	81.25		8	45	100
45	11	68.75		9	45	100
50	11	68.75		10	45	100
55	10	62.5		11	45	100
60	10	62.5		12	45	100
65	10	62.5		13	45	100
70	7	43.75		14	45	100
75	5	31.25		15	45	100
80	5	31.25		16	45	100
85	4	25		17	45	100
90	2	12.5		18	45	100
95	1	6.25		19	45	100
100	0	0		20	45	100
				21	45	100
				22	44	97.7778
				23	44	97.7778
				24	44	97.7778
				25	44	97.7778
				26	44	97.7778
				27	44	97.7778
				28	44	97.7778
				29	44	97.7778
				30	44	97.7778
				31	44	97.7778
				32	44	97.7778
				33	44	97.7778
				34	44	97.7778
				35	44	97.7778
				36	44	97.7778
				37	44	97.7778
				38	44	97.7778
				39	44	97.7778
				40	44	97.7778
				41	44	97.7778
				42	44	97.7778
				43	44	97.7778
				44	44	97.7778
				45	44	97.7778
				46	44	97.7778
				47	44	97.7778
				48	44	97.7778
				49	44	97.7778
				50	44	97.7778
				51	44	97.7778
				52	44	97.7778
				53	44	97.7778
				54	44	97.7778
				55	44	97.7778
				56	44	97.7778
				57	44	97.7778
				58	44	97.7778
				59	43	95.5556
				60	43	95.5556
				61	43	95.5556
				62	43	95.5556
				63	43	95.5556
				64	43	95.5556
				65	43	95.5556
				66	43	95.5556
				67	43	95.5556
				68	43	95.5556
				69	43	95.5556
				70	43	95.5556
				71	43	95.5556
				72	43	95.5556
				73	43	95.5556
				74	43	95.5556
				75	43	95.5556
				76	42	93.3333
				77	42	93.3333
				78	42	93.3333
				79	42	93.3333
				80	42	93.3333
				81	42	93.3333
				82	42	93.3333
				83	42	93.3333
				84	42	93.3333
				85	42	93.3333
				86	42	93.3333
				87	41	91.1111
				88	41	91.1111
				89	39	86.6667
				90	39	86.6667
				91	39	86.6667
				92	39	86.6667
				93	38	84.4444
				94	36	80
				95	33	73.3333
				96	31	68.8889
				97	28	62.2222
				98	22	48.8889
				99	16	35.5556
				100	0	0

## Sheet: C. MITF and MLX co-expression
		The 15 tissues where both MLX and MITF group member have expression levels above the 75th percentile of all genes															The other 22 tissues
Orhtologous group	Protein	heart muscle	lung	skeletal muscle	adrenal gland	tonsil	adipose tissue	duodenum	kidney	liver	pancreas	salivary gland	small intestine	colon	esophagus	rectum	stomach	appendix	spleen	lymph node	bone marrow	gallbladder	placenta	seminal vesicle	smooth muscle	cervix;uterine	urinary bladder	cerebral cortex	endometrium	ovary	parathyroid gland	breast	epididymis	fallopian tube	prostate	skin	testis	thyroid gland
MLX (EggNog5 ID: KOG1319)	MLX	1	1	1	1	1	1	1	1	1	1	1	1	1	1	1	1	0	0	0	0	0	0	0	0	0	0	0	0	0	0	0	0	0	0	0	0	0
MITF (EggNog5 ID: KOG1318)	MITF	1	0	1	0	0	0	0	1	0	0	0	0	0	0	0	0	0	0	0	0	1	0	1	1	1	0	0	1	0	0	0	0	0	0	0	0	0
MITF (EggNog5 ID: KOG1318)	TFE3	0	1	0	1	0	1	0	0	0	0	0	0	0	0	0	0	1	1	0	1	0	1	1	1	1	0	0	0	0	0	0	0	0	0	0	0	0
MITF (EggNog5 ID: KOG1318)	TFEB	1	0	1	0	1	0	0	0	0	1	1	0	0	1	0	0	1	1	1	0	1	1	0	0	0	1	0	0	0	1	0	0	0	0	0	0	0
MITF (EggNog5 ID: KOG1318)	TFEC	0	1	0	0	1	0	0	1	0	0	0	1	0	0	0	0	1	1	1	1	1	0	0	0	0	0	0	0	0	0	0	0	0	0	0	0	0
MITF (EggNog5 ID: KOG1318)	USF1	1	1	1	1	1	0	1	0	1	0	0	0	1	0	1	0	1	1	1	0	0	1	1	1	0	1	0	0	0	0	0	0	0	0	0	0	0
MITF (EggNog5 ID: KOG1318)	USF2	1	1	1	1	0	1	1	0	1	1	1	1	0	0	0	0	1	1	1	1	0	0	0	0	0	0	1	0	1	0	0	0	0	0	0	0	0

## Sheet: D. Data for Fig.S5E (clusters)
Human
Percentile cutoff (%)	Number of TF families	Percent of all TF families (excluding zinc finger families)
0	158	100
1	158	100
2	158	100
3	158	100
4	158	100
5	158	100
6	158	100
7	158	100
8	158	100
9	158	100
10	158	100
11	158	100
12	158	100
13	158	100
14	158	100
15	158	100
16	158	100
17	158	100
18	158	100
19	157	99.3671
20	157	99.3671
21	157	99.3671
22	157	99.3671
23	157	99.3671
24	157	99.3671
25	157	99.3671
26	157	99.3671
27	157	99.3671
28	157	99.3671
29	157	99.3671
30	157	99.3671
31	157	99.3671
32	157	99.3671
33	157	99.3671
34	157	99.3671
35	157	99.3671
36	157	99.3671
37	157	99.3671
38	157	99.3671
39	157	99.3671
40	157	99.3671
41	157	99.3671
42	157	99.3671
43	157	99.3671
44	157	99.3671
45	157	99.3671
46	157	99.3671
47	157	99.3671
48	157	99.3671
49	156	98.7342
50	156	98.7342
51	156	98.7342
52	156	98.7342
53	156	98.7342
54	156	98.7342
55	156	98.7342
56	156	98.7342
57	156	98.7342
58	156	98.7342
59	156	98.7342
60	156	98.7342
61	156	98.7342
62	156	98.7342
63	156	98.7342
64	155	98.1013
65	155	98.1013
66	155	98.1013
67	155	98.1013
68	154	97.4684
69	154	97.4684
70	154	97.4684
71	154	97.4684
72	154	97.4684
73	154	97.4684
74	154	97.4684
75	154	97.4684
76	154	97.4684
77	154	97.4684
78	153	96.8354
79	152	96.2025
80	151	95.5696
81	149	94.3038
82	149	94.3038
83	147	93.038
84	145	91.7722
85	144	91.1392
86	142	89.8734
87	141	89.2405
88	137	86.7089
89	135	85.443
90	130	82.2785
91	123	77.8481
92	117	74.0506
93	110	69.6203
94	100	63.2911
95	91	57.5949
96	86	54.4304
97	77	48.7342
98	65	41.1392
99	47	29.7468
100	0	0
